# Supplementary material for: Substrate-controlled divergent remote C–H and N–H polyfluoroarylation of 2-aminopyrimidines with polyfluoroarenes via Pd(ii)/Pd(0) catalysis
Source: Royal Society of Chemistry journal article supplement (doi:10.1039/d4cc01518e), 2024-01-01

--- Electronic Supplementary Information---

**Substrate-controlled divergent remote C-H and N-H  
polyfluoroarylation of 2-aminopyrimidines with polyfluoroarenes  
via Pd(II)/Pd(0) catalysis**

**Animesh Das and Biplab Maji\***

**Department of Chemical Sciences, Indian Institute of Science Education and Research Kolkata,  
Mohanpur 741246, India.**

**E-mail: [bm@iiserkol.ac.in](mailto:bm@iiserkol.ac.in)**

## Table of Contents:

|                                                                                                    |     |
|----------------------------------------------------------------------------------------------------|-----|
| 1. General information.....                                                                        | S3  |
| 2. Preparation of starting materials and their characterization.....                               | S4  |
| 3. Optimization studies for C5-H and N-H polyfluoroarylation of 2-aminopyrimidines.....            | S24 |
| 4. General procedure for Pd-catalyzed C5-H polyfluoroarylation of 2-aminopyrimidines.....          | S27 |
| 5. General procedure for Pd-catalyzed N-H polyfluoroarylation of 2-aminopyrimidines.....           | S27 |
| 6. Characterisation of products <b>3</b> and <b>4</b> .....                                        | S28 |
| 7. Synthetic applications.....                                                                     | S48 |
| 7.1 Late-stage functionalization of Buspirone.....                                                 | S48 |
| 7.2 Deprotection of tert-butyl group.....                                                          | S48 |
| 8. Crystal data.....                                                                               | S49 |
| 9. Mechanistic investigations.....                                                                 | S53 |
| 9.1 H/D exchange experiment with 2-aminopyrimidine <b>1a</b> using CD <sub>3</sub> COOD.....       | S53 |
| 9.2 Kinetic isotope effect Experiments .....                                                       | S54 |
| 9.3 H/D exchange experiment with N-phenylpyrimidin-2-amine <b>1'a</b> using D <sub>2</sub> O.....  | S56 |
| 9.4 Control experiment with Pd(OAc) <sub>2</sub> ( <i>i</i> -Pr <sub>2</sub> S) <sub>2</sub> ..... | S58 |
| 9.5 Control experiment with <b>1'l</b> , <b>5a</b> and <b>5b</b> .....                             | S59 |
| 9.6 Equilibrium study with <b>1a</b> and Pd(OAc) <sub>2</sub> .....                                | S59 |
| 10. Proposed Mechanism.....                                                                        | S61 |
| 11. References.....                                                                                | S62 |
| 12. Copies of NMR spectra.....                                                                     | S63 |

## 1. General information

Reaction temperatures are reported as the temperature of the bath surrounding the vessel unless otherwise stated. Non-halogenated solvents were dried over calcium hydride. All the solvents were degassed with argon and stored over activated molecular sieves (4 Å).

*Analytical:*  $^1\text{H}$ ,  $^{13}\text{C}$ ,  $^{19}\text{F}$  NMR spectra were collected using Bruker ( $^1\text{H}$ : 500 MHz,  $^{13}\text{C}$ : 126 MHz,  $^{19}\text{F}$  { $^1\text{H}$ }: 470 MHz) and JEOL ( $^1\text{H}$ : 400 MHz,  $^{13}\text{C}$  { $^1\text{H}$ }: 100 MHz,  $^{19}\text{F}$  { $^1\text{H}$ }: 376 MHz) and were referenced to the resonances of the solvent used. Coupling constants ( $J$ ) are reported in Hertz (Hz). Coupling patterns are indicated as: s (singlet), d (doublet), t (triplet), q (quartet), dd (doublet of doublet), dt (doublet of triplet), ddd (doublet of doublets of doublets), m (multiplet), or br (broad). Mass spectra were recorded on Bruker micrOTOF-Q II spectrometer. For thin-layer chromatography (TLC) analysis Merck pre-coated TLC plates (silica gel 60 F254 0.25 mm) were used. Visualization was accomplished by UV light (254 nm),  $\text{KMnO}_4$ , and ceric ammonium molybdate stain.

*Chemicals:* Commercially available chemicals were purchased from Sigma–Aldrich, Combi-Blocks, TCI Chemicals, BLD Pharma, Alfa–Aesar, and Avra Synthesis and used without further purification. 2-Aminoazines, polyfluoroarenes,<sup>2</sup> **11**,<sup>3</sup> and **5b**<sup>3</sup> were prepared by following the literature procedures.

## 2. Preparation of starting materials and their characterization

**Table S1.** Preparation of 2-aminopyrimidines

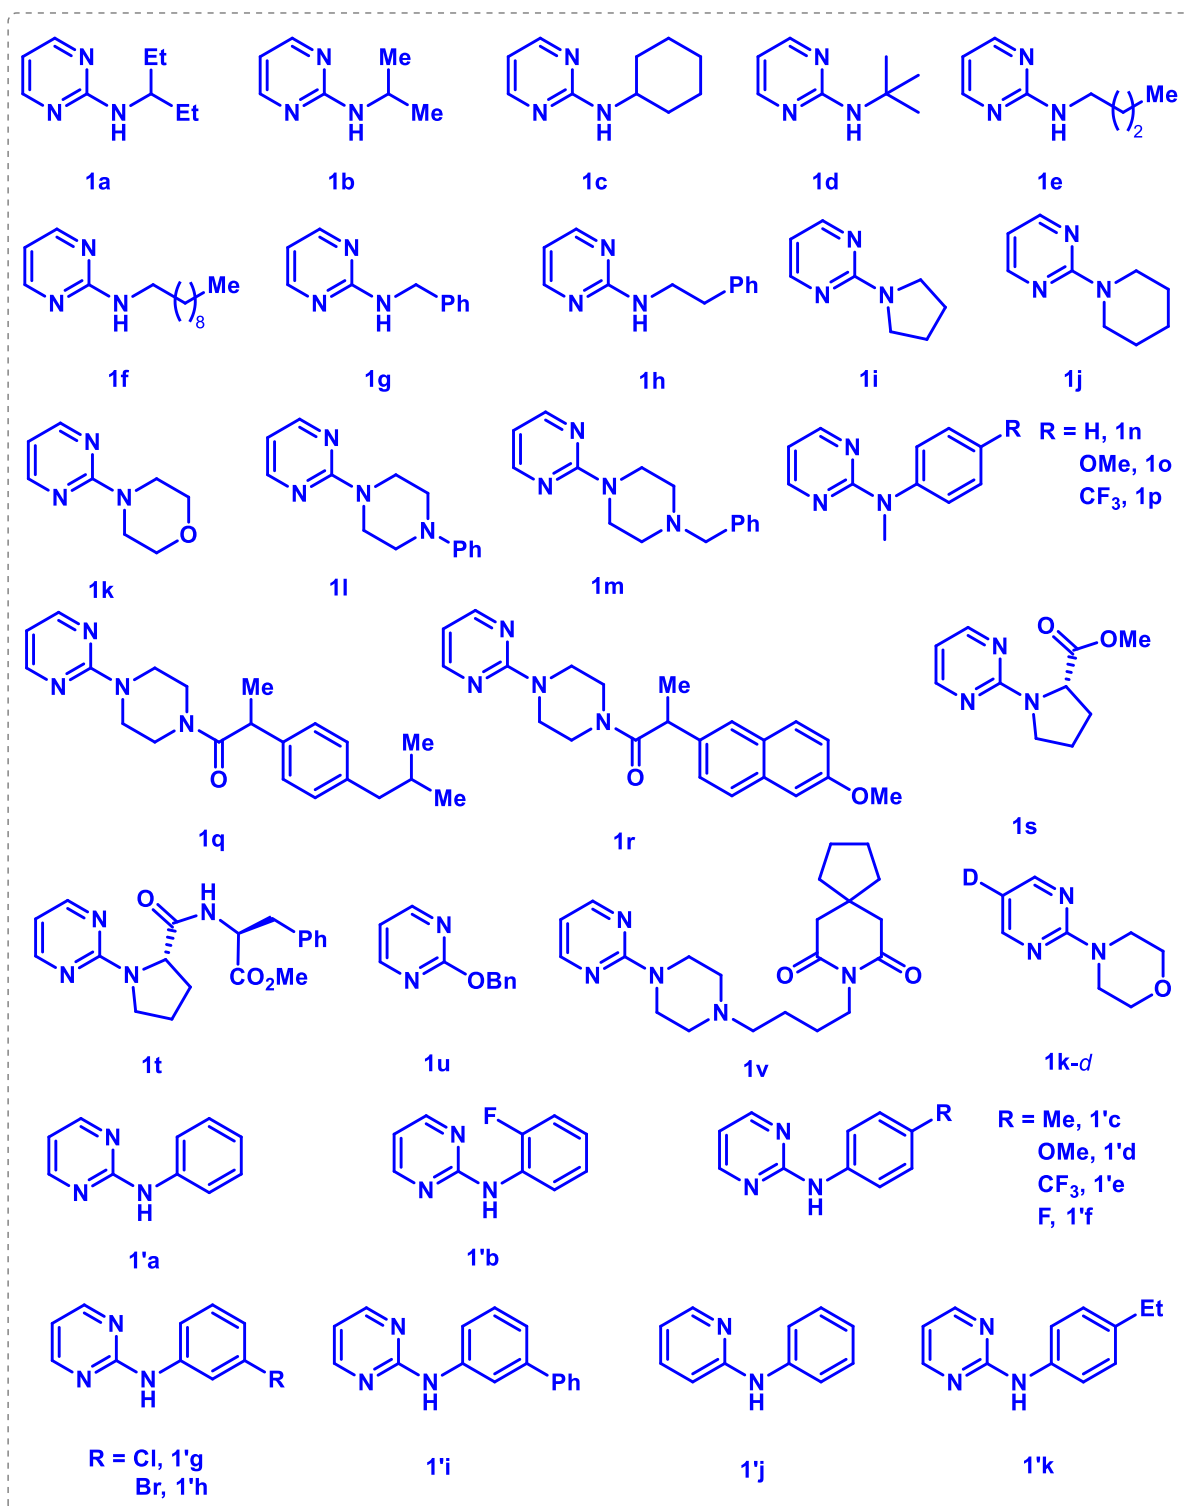

## General procedure for preparation of substrates 1a-1l

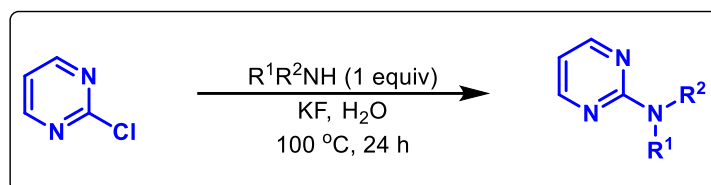

2-Aminopyrimidines **1a-1l** were prepared according to the literature procedure.<sup>4</sup> To a 15 mL sealed tube was added 2-chloropyrimidine (4 mmol), amine (4 mmol), and potassium fluoride (8 mmol) in water (2.5 mL), and the resulting mixture was heated to 100 °C for 17 h on an oil bath. Once cooled, the mixture was quenched with aqueous potassium carbonate solution (40 mL) and extracted into ethyl acetate (2 x 30 mL). The organic extracts were then combined and washed with brine before being dried over sodium sulfate, and the solvent evaporated under reduced pressure. The purification was carried out by column chromatography over silica gel. Yields are not optimized.

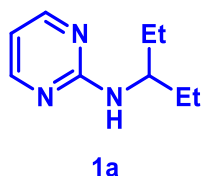

**N-(pentan-3-yl)pyrimidin-2-amine (1a):**<sup>5</sup> Yield: 85% (3.4 mmol, 561 mg). <sup>1</sup>H NMR (500 MHz, CDCl<sub>3</sub>) δ 8.22 (d, *J* = 4.6 Hz, 2H), 6.45 (t, *J* = 4.8 Hz, 1H), 5.30 (d, *J* = 7.2 Hz, 1H), 3.88 (dd, *J* = 7.3, 1.7 Hz, 1H), 1.67 – 1.57 (m, 2H), 1.53 – 1.43 (m, 2H), 0.92 (t, *J* = 7.4 Hz, 6H). <sup>13</sup>C NMR (101 MHz, CDCl<sub>3</sub>) δ 158.1, 110.0, 53.4, 27.2, 10.2.

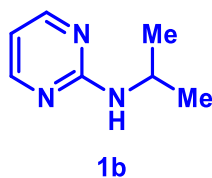

**N-isopropylpyrimidin-2-amine (1b):**<sup>5</sup> Yield: 84% (3.36 mmol, 460 mg). <sup>1</sup>H NMR (500 MHz, CDCl<sub>3</sub>) δ 8.25 (d, *J* = 4.7 Hz, 4H), 6.48 (d, *J* = 4.8 Hz, 2H), 4.12 (d, *J* = 7.4 Hz, 2H), 1.23 (d, *J* = 6.5 Hz, 13H). <sup>13</sup>C NMR (126 MHz, CDCl<sub>3</sub>) δ 162.0, 158.2, 110.3, 42.9, 23.0.

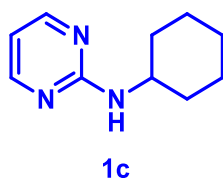

**N-cyclohexylpyrimidin-2-amine (1c):**<sup>5</sup> Yield: 77% (3.1 mmol, 545 mg). <sup>1</sup>H NMR (500 MHz, CDCl<sub>3</sub>) δ 8.22 (d, *J* = 4.7 Hz, 2H), 6.44 (t, *J* = 4.8 Hz, 1H), 5.27 (d, *J* = 4.3 Hz, 1H), 3.79 (ddd, *J* = 10.4, 9.3, 4.3 Hz, 1H), 2.06 – 1.98 (m, 2H), 1.76 – 1.68 (m, 2H), 1.65 – 1.57 (m, 1H), 1.39 (dd, *J* = 20.8, 7.7 Hz,

2H), 1.21 (dd,  $J = 16.9, 8.0$  Hz, 3H).  $^{13}\text{C}$  NMR (126 MHz,  $\text{CDCl}_3$ )  $\delta$  162.0, 158.1, 110.2, 49.7, 33.4, 25.9, 25.0.

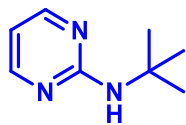

**1d**

**N-(tert-butyl)pyrimidin-2-amine (1d):**<sup>5,6</sup> Yield: 86% (3.44 mmol, 519 mg).  $^1\text{H}$  NMR (500 MHz,  $\text{CDCl}_3$ )  $\delta$  8.23 (d,  $J = 4.7$  Hz, 2H), 6.46 (t,  $J = 4.8$  Hz, 1H), 5.12 (s, 1H), 1.44 (s, 9H).  $^{13}\text{C}$  NMR (101 MHz,  $\text{CDCl}_3$ )  $\delta$  162.3, 157.7, 110.2, 50.9, 29.0.

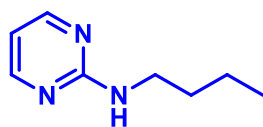

**1e**

**N-butylpyrimidin-2-amine (1e):**<sup>5,7</sup> Yield: 76% (3.05 mmol, 459 mg).  $^1\text{H}$  NMR (400 MHz,  $\text{CDCl}_3$ )  $\delta$  8.25 (d,  $J = 4.7$  Hz, 2H), 6.48 (t,  $J = 4.8$  Hz, 1H), 5.30 (s, 1H), 3.38 (td,  $J = 7.2, 5.9$  Hz, 2H), 1.63 – 1.53 (m, 2H), 1.40 (dd,  $J = 15.2, 7.4$  Hz, 2H), 0.93 (t,  $J = 7.3$  Hz, 3H).  $^{13}\text{C}$  NMR (126 MHz,  $\text{CDCl}_3$ )  $\delta$  162.6, 158.1, 110.35, 41.3, 31.8, 20.2, 13.9.

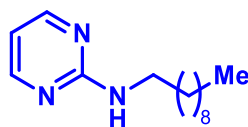

**1f**

**N-decylpyrimidin-2-amine (1f):**<sup>8</sup> Yield: 73% (2.9 mmol, 686 mg).  $^1\text{H}$  NMR (500 MHz,  $\text{CDCl}_3$ )  $\delta$  8.27 (d,  $J = 4.7$  Hz, 2H), 6.51 (t,  $J = 4.8$  Hz, 1H), 5.24 (s, 1H), 3.39 (td,  $J = 7.1, 5.9$  Hz, 2H), 1.60 (dt,  $J = 14.8, 7.3$  Hz, 2H), 1.27 (d,  $J = 13.1$  Hz, 14H), 0.88 (t,  $J = 7.0$  Hz, 3H).  $^{13}\text{C}$  NMR (101 MHz,  $\text{CDCl}_3$ )  $\delta$  162.6, 158.1, 110.4, 41.6, 32.0, 29.8 – 29.7 (m), 29.5, 29.5, 27.1, 22.8, 15.0.

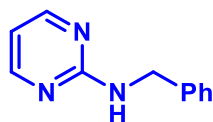

**1g**

**N-benzylpyrimidin-2-amine (1g):**<sup>9</sup> Yield: 59% (2.4 mmol, 436 mg).  $^1\text{H}$  NMR (400 MHz,  $\text{CDCl}_3$ )  $\delta$  8.20 (s, 2H), 7.34 (q,  $J = 8.0$  Hz, 4H), 7.30 – 7.25 (m, 1H), 6.51 (t,  $J = 4.8$  Hz, 1H), 5.97 (s, 1H), 4.64 (d,  $J = 5.9$  Hz, 2H).  $^{13}\text{C}$  NMR (101 MHz,  $\text{CDCl}_3$ )  $\delta$  162.4, 158.2, 128.7, 127.7, 127.4, 110.9, 45.6.

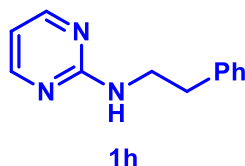

**N-phenethylpyrimidin-2-amine (1h):**<sup>10</sup> Yield: 78% (3.1 mmol, 620 mg). **<sup>1</sup>H NMR** (400 MHz, CDCl<sub>3</sub>) δ 8.27 (d, *J* = 4.7 Hz, 4H), 7.33 – 7.27 (m, 5H), 7.23 (d, *J* = 7.5 Hz, 7H), 6.52 (t, *J* = 4.8 Hz, 2H), 5.18 (s, 2H), 3.77 – 3.63 (m, 5H), 2.92 (t, *J* = 7.0 Hz, 5H). **<sup>13</sup>C NMR** (101 MHz, CDCl<sub>3</sub>) δ 158.2, 139.3, 129.0, 128.7, 126.5, 110.7, 42.7, 35.8.

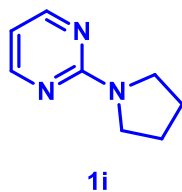

**2-(pyrrolidin-1-yl)pyrimidine (1i):**<sup>11</sup> Yield: 72% (2.9 mmol, 429 mg). **<sup>1</sup>H NMR** (400 MHz, CDCl<sub>3</sub>) δ 8.27 (d, *J* = 4.7 Hz, 2H), 6.41 (t, *J* = 4.7 Hz, 1H), 3.56 – 3.51 (m, 4H), 1.96 (dd, *J* = 6.5, 3.3 Hz, 4H). **<sup>13</sup>C NMR** (101 MHz, CDCl<sub>3</sub>) δ 160.3, 157.8, 108.9, 46.7, 25.7.

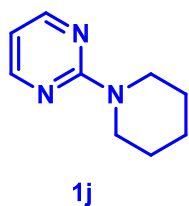

**2-(piperidin-1-yl)pyrimidine (1j):**<sup>11</sup> Yield: 85% (3.4 mmol, 554 mg). **<sup>1</sup>H NMR** (400 MHz, CDCl<sub>3</sub>) δ 8.27 (d, *J* = 4.7 Hz, 2H), 6.40 (t, *J* = 4.7 Hz, 1H), 3.78 – 3.74 (m, 4H), 1.69 – 1.63 (m, 2H), 1.62 – 1.56 (m, 4H). **<sup>13</sup>C NMR** (101 MHz, CDCl<sub>3</sub>) δ 161.7, 157.8, 109.1, 44.8, 25.8, 25.0.

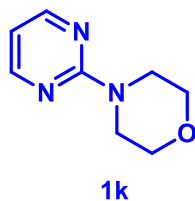

**4-(pyrimidin-2-yl)morpholine (1k):**<sup>11</sup> Yield: 84% (3.4 mmol, 554 mg). **<sup>1</sup>H NMR** (500 MHz, CDCl<sub>3</sub>) δ 8.29 (d, *J* = 4.7 Hz), 6.49 (t, *J* = 4.7 Hz), 3.75 (tt, *J* = 6.9, 2.8 Hz). **<sup>13</sup>C NMR** (126 MHz, CDCl<sub>3</sub>) δ 161.9, 157.8, 110.4, 66.9, 44.3.

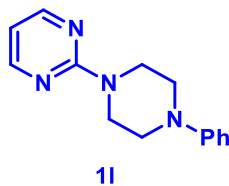

**2-(4-phenylpiperazin-1-yl)pyrimidine (1l):**<sup>4</sup> Yield: 79% (3.2 mmol, 758 mg). **<sup>1</sup>H NMR** (500 MHz, CDCl<sub>3</sub>) δ 8.34 (d, *J* = 4.7 Hz), 7.29 (t, *J* = 7.8 Hz), 6.98 (d, *J* = 8.4 Hz), 6.89 (t, *J* = 7.3 Hz), 6.51 (t, *J* =

4.7 Hz), 4.01 – 3.98 (m), 3.27 – 3.24 (m).  $^{13}\text{C}$  NMR (126 MHz,  $\text{CDCl}_3$ )  $\delta$  161.8, 157.9, 151.5, 129.3, 120.2, 116.6, 110.2, 49.4, 43.8.

### General procedure for preparation of substrates **1m**

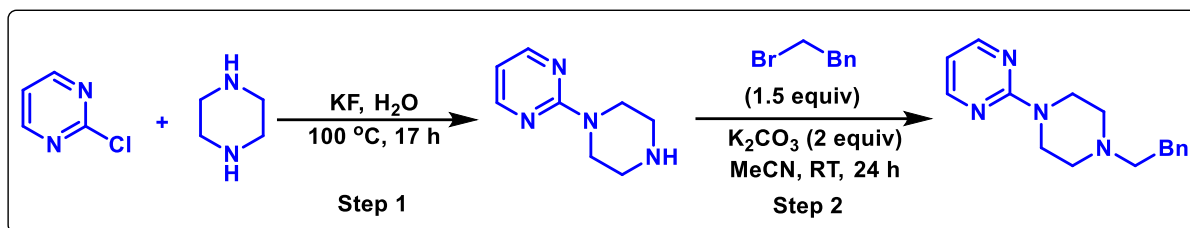

**Step 1:** To a 15 mL sealed tube was added 2-chloropyrimidine (4 mmol), piperazine (4 mmol), and potassium fluoride (8 mmol) in solvent (2.5 mL), and the resulting mixture was heated to 100 °C for 17 h on an oil bath. Once cooled, the mixture was quenched with aqueous potassium carbonate solution (40 mL) and extracted into ethyl acetate (2 x 30 mL). The organic extracts were then combined and washed with brine before being dried over anhydrous sodium sulfate, and the solvent evaporated under reduced pressure. The 2-(piperazin-1-yl)pyrimidine was purified by column chromatography over silica gel using a mixture of MeOH/DCM as eluent.

**Step 2:** To a solution of 2-(piperazin-1-yl)pyrimidine (3 mmol) in MeCN (6 mL) was added K<sub>2</sub>CO<sub>3</sub> (6 mmol), followed by dropwise addition of benzyl bromide (4.5 mmol). The reaction mixture was stirred for 24 hours at 70 °C. The reaction mixture was cooled to room temperature and diluted with water and EtOAc. The organic layer was washed with brine, dried over anhydrous sodium sulfate, filtered, and concentrated *in vacuo*. The product was purified by silica gel column chromatography using a mixture of EtOAc/n-hexane as eluent.

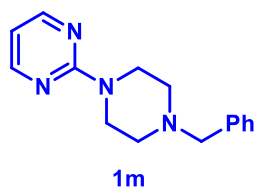

**2-(4-benzylpiperazin-1-yl)pyrimidine (1m):** Yield: 52% (1.56, 396 mg).  $^1\text{H}$  NMR (400 MHz,  $\text{CDCl}_3$ )  $\delta$  8.29 (d,  $J$  = 4.8 Hz, 2H), 7.37 – 7.31 (m, 4H), 7.28 (dd,  $J$  = 5.7, 2.7 Hz, 1H), 6.46 (t,  $J$  = 4.8 Hz, 1H), 3.85 – 3.81 (m, 4H), 3.56 (s, 2H), 2.53 – 2.49 (m, 4H).  $^{13}\text{C}$  NMR (101 MHz,  $\text{CDCl}_3$ )  $\delta$  161.8, 157.8, 138.0, 129.4, 128.4, 127.3, 109.9, 63.3, 53.1, 43.8. HRMS calcd. for  $\text{C}_{15}\text{H}_{19}\text{N}_4$   $[\text{M}+\text{H}]^+$ : 255.1604 Found: 255.1601.



## General procedure for preparation of substrates 1n-1p

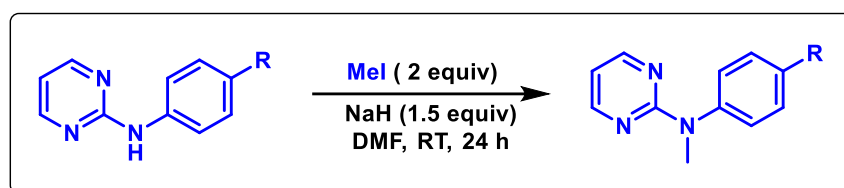

To a solution of *N*-arylpyrimidin-2-amine derivative (3 mmol) in dry DMF (6 mL) was added NaH (4.5 mmol), followed by dropwise addition of iodomethane (6 mmol). The reaction mixture was stirred for 24 hours at room temperature. Upon completion, the reaction mixture was diluted with water and EtOAc. The organic layer was washed with brine, dried over anhydrous sodium sulfate, filtered, and concentrated *in vacuo*. The mixture was purified by silica gel column chromatography using a mixture of EtOAc/n-hexane as eluent to afford the desired product *N*-methyl-*N*-arylpyrimidin-2-amine derivatives.

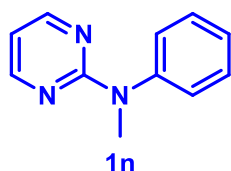

***N*-methyl-*N*-phenylpyrimidin-2-amine (1n):**<sup>12</sup> Yield: 84% (2.52 mmol, 466 mg). <sup>1</sup>H NMR (500 MHz, CDCl<sub>3</sub>) δ 8.34 (d, *J* = 4.6 Hz, 2H), 7.41 (t, *J* = 7.7 Hz, 2H), 7.32 (d, *J* = 7.6 Hz, 2H), 7.24 (t, *J* = 7.4 Hz, 1H), 6.57 (t, *J* = 4.4 Hz, 1H), 3.53 (s, 3H). <sup>13</sup>C NMR (126 MHz, CDCl<sub>3</sub>) δ 157.8, 145.7, 129.3, 126.7, 126.0, 110.9, 38.8.

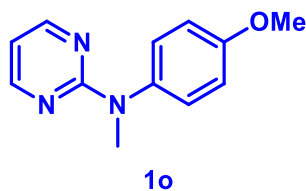

***N*-(4-methoxyphenyl)-*N*-methylpyrimidin-2-amine (1o):**<sup>13</sup> Yield: 90% (2.7 mmol, 580 mg). <sup>1</sup>H NMR (400 MHz, CDCl<sub>3</sub>) δ 8.32 (d, *J* = 4.8 Hz, 2H), 7.24 – 7.19 (m, 2H), 6.97 – 6.92 (m, 2H), 6.53 (t, *J* = 4.7 Hz, 1H), 3.81 (s, 3H), 3.48 (s, 3H). <sup>13</sup>C NMR (101 MHz, CDCl<sub>3</sub>) δ 162.3, 157.8, 138.5, 128.0, 114.7, 110.4, 55.5, 39.0.

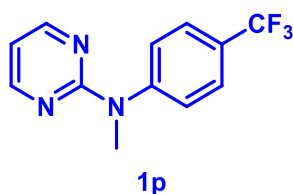

***N*-methyl-*N*-(4-(trifluoromethyl)phenyl)pyrimidin-2-amine (1p):**<sup>14</sup> Yield: 75% (2.25 mmol, 570 mg). <sup>1</sup>H NMR (500 MHz, CDCl<sub>3</sub>) δ 8.38 (d, *J* = 3.8 Hz, 2H), 7.64 (d, *J* = 7.6 Hz, 2H), 7.48 (d, *J* = 7.8 Hz, 2H), 6.65 (d, *J* = 3.4 Hz, 1H), 3.58 (s, 3H). <sup>13</sup>C NMR (126 MHz, CDCl<sub>3</sub>) δ 161.6, 157.8, 148.6,

127.1 (q,  $^2J_{C-F} = 32.8$  Hz), 126.2 (q,  $^1J_{C-F} = 2.5$  Hz), 126.1, 124.3 (q,  $^3J_{C-F} = 272.2$  Hz), 111.9, 38.3.  $^{19}\text{F}$  NMR (471 MHz,  $\text{CDCl}_3$ )  $\delta$  -62.25.

### General procedure for preparation of substrates **1q** and **1r**

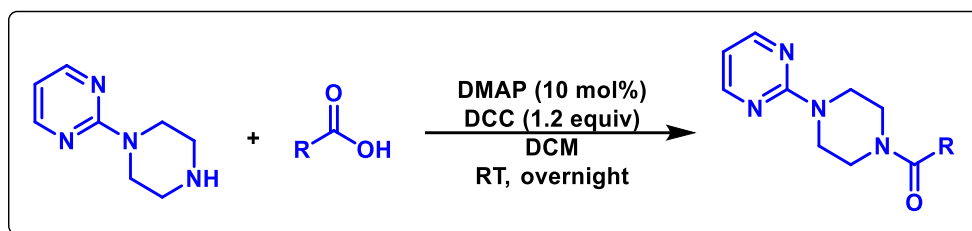

The piperazine derivatives **1q** and **1r** were prepared according to the literature procedure.<sup>15</sup> To a stirred solution of 2-(piperazin-1-yl)pyrimidine (3 mmol) and the carboxylic acid (3 mmol) in DCM (9 mL) was added DCC (3.6 mmol) and DMAP (10 mol%). The solution was stirred for 24 h at room temperature, during which a white precipitate was formed. The solids were filtered, and the filtrate was washed with saturated  $\text{NaHCO}_3$  solution ( $2 \times 5$  mL). The combined organic layers were dried over  $\text{Na}_2\text{SO}_4$ , filtered, and concentrated *in vacuo*. The crude mixture was purified by silica gel column chromatography using a mixture of EtOAc/n-hexane as eluent.

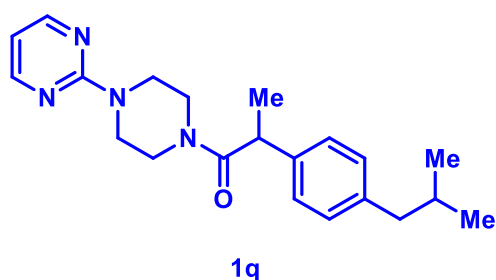

**2-(4-isobutylphenyl)-1-(4-(pyrimidin-2-yl)piperazin-1-yl)propan-1-one (1q)**: Yield: 82% (2.5 mmol, 865 mg).  $^1\text{H}$  NMR (400 MHz,  $\text{CDCl}_3$ )  $\delta$  8.26 (d,  $J = 4.7$  Hz, 2H), 7.15 (d,  $J = 8.2$  Hz, 2H), 7.08 (d,  $J = 8.0$  Hz, 2H), 6.48 (t,  $J = 4.8$  Hz, 1H), 3.99 – 3.85 (m, 3H), 3.81 – 3.75 (m, 1H), 3.58 – 3.47 (m, 2H), 3.46 – 3.37 (m, 2H), 3.10 – 3.03 (m, 1H), 2.42 (d,  $J = 7.2$  Hz, 2H), 1.87 – 1.77 (m, 1H), 1.46 (d,  $J = 6.8$  Hz, 3H), 0.86 (d,  $J = 6.6$  Hz, 6H).  $^{13}\text{C}$  NMR (101 MHz,  $\text{CDCl}_3$ )  $\delta$  172.6, 161.5, 157.8, 140.4, 129.8, 127.0, 110.4, 45.4, 45.1, 43.5 (d,  $J = 6.3$  Hz), 43.3, 42.0, 30.3, 22.5, 20.8. HRMS calcd. for  $\text{C}_{21}\text{H}_{29}\text{N}_4\text{O}$   $[\text{M}+\text{H}]^+$ : 353.2336 Found: 353.2343.

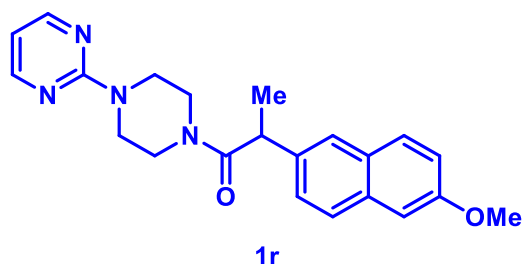

**2-(6-methoxynaphthalen-2-yl)-1-(4-(pyrimidin-2-yl)piperazin-1-yl)propan-1-one (1r)**: Yield: 69% (2.1 mmol, 778 mg).  $^1\text{H}$  NMR (400 MHz,  $\text{CDCl}_3$ )  $\delta$  8.24 (d,  $J = 4.8$  Hz, 2H), 7.69 (dd,  $J = 11.5, 8.8$

Hz, 2H), 7.62 (s, 1H), 7.37 (dd,  $J = 8.4, 1.8$  Hz, 1H), 7.16 – 7.08 (m, 2H), 6.46 (t,  $J = 4.6$  Hz, 1H), 4.04 (q,  $J = 6.7$  Hz, 1H), 3.99 – 3.92 (m, 2H), 3.90 (s, 3H), 3.75 (dt,  $J = 13.0, 4.5$  Hz, 1H), 3.55 (d,  $J = 10.4$  Hz, 2H), 3.47 (t,  $J = 4.6$  Hz, 2H), 3.09 – 3.00 (m, 1H), 1.54 (d,  $J = 6.8$  Hz, 3H).  $^{13}\text{C}$  NMR (101 MHz,  $\text{CDCl}_3$ )  $\delta$  157.8, 129.2, 127.8, 126.1, 125.6, 110.4, 105.7, 55.4, 45.4, 43.6, 42.0, 20.9. HRMS calcd. for  $\text{C}_{22}\text{H}_{25}\text{N}_4\text{O}_2$   $[\text{M}+\text{H}]^+$ : 377.1972 Found: 377.1973.

#### Procedure for preparation of substrates **1s**

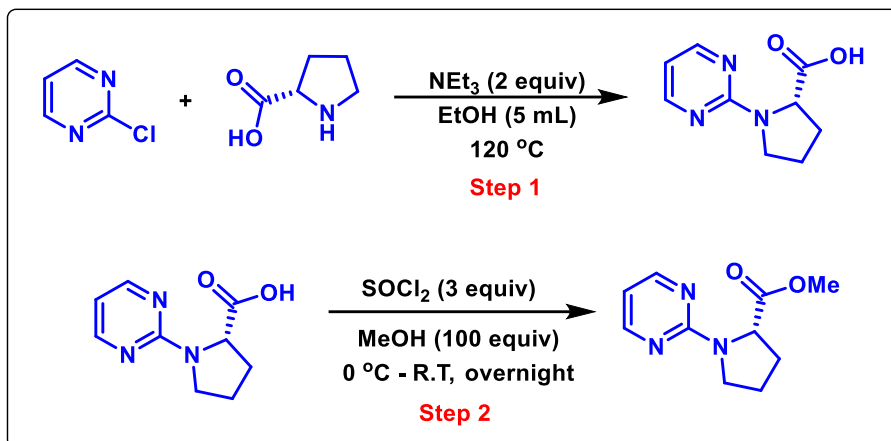

**Step 1:** To a solution of 2-chloropyrimidine (4 mmol) in ethanol (5 mL) was added triethylamine (2 equiv) followed by the addition of L-proline (1.3 equiv). The reaction mixture was stirred at 120 °C overnight. Upon completion, the reaction mixture was quenched with water, diluted with EtOAc, and acidified to pH < 4 with 3 M HCl (aq.). Then, the aqueous layer was extracted with EtOAc. The combined organic layers were dried over anhydrous  $\text{Na}_2\text{SO}_4$ , filtered, and concentrated *in vacuo*. The crude carboxylic acid was used without further purification.

**Step 2:** pyrimidin-2-ylproline (2 mmol, 1.00 equiv) was dissolved in methanol (100 equiv), and the mixture was cooled with an ice bath to 0°C. Subsequently, thionyl chloride (3.00 equiv) was added dropwise, and the solution was stirred at room temperature overnight. The solution was neutralized with saturated  $\text{NaHCO}_3$ -solution, and then  $\text{K}_2\text{CO}_3$  was added till a pH value of eight was acquired. Precipitating salts were dissolved by the addition of water. Afterward, the organic phase was extracted with DCM ( $7 \times 150$  mL), and the combined organic layers were dried over sodium sulfate, filtered, and concentrated *in vacuo*. The ester product was purified by silica gel column chromatography using a mixture of EtOAc/n-hexane as eluent to give **1s** in 58% yield.

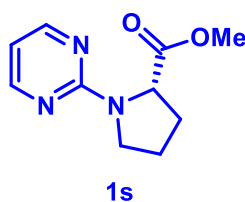

**methyl pyrimidin-2-ylproline (1s):**<sup>16</sup> Yield: 58% (1.2 mmol, 240 mg). <sup>1</sup>H NMR (400 MHz, CDCl<sub>3</sub>) δ 8.29 (s, 2H), 6.50 (t, *J* = 4.8 Hz, 1H), 4.57 (dd, *J* = 8.6, 3.3 Hz, 1H), 3.84 – 3.76 (m, 1H), 3.71 (s, 3H), 3.69 – 3.64 (m, 1H), 2.39 – 2.27 (m, 1H), 2.19 – 1.92 (m, 4H). <sup>13</sup>C NMR (101 MHz, CDCl<sub>3</sub>) δ 174.3, 160.1, 157.8, 110.2, 59.6, 52.2, 47.1, 30.6, 24.2.

#### Procedure for preparation of substrates 1t

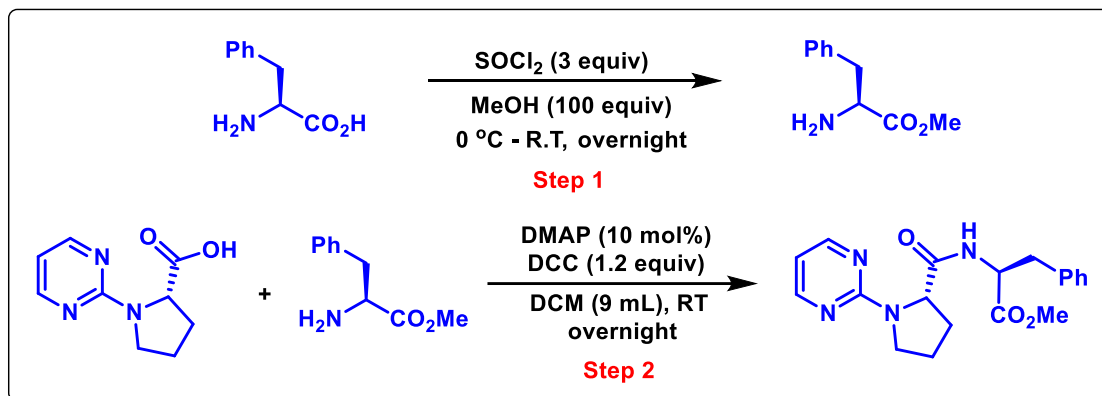

**Step 1:** L-phenylalanine (5 mmol, 1.00 equiv) was dissolved in methanol (100 equiv), and the mixture was cooled with an ice bath to 0°C. Subsequently, thionyl chloride (3.00 equiv) was added dropwise, and the solution was stirred at room temperature overnight. The solution was neutralized with saturated NaHCO<sub>3</sub>-solution, and then K<sub>2</sub>CO<sub>3</sub> was added till a pH value of eight was acquired. Precipitating salts were dissolved by the addition of water. Afterward, the organic phase was extracted with DCM (7 × 150 mL), the combined organic layers were dried over sodium sulfate, filtered, and concentrated under a vacuum. The ester product was purified by silica gel column chromatography using a mixture of EtOAc/n-hexane as eluent.

**Step 2:** To a stirred solution of methyl L-phenylalaninate (3 mmol) and the pyrimidin-2-ylproline (3 mmol) in DCM (9 mL) was added DCC (3.6 mmol) and DMAP (10 mol%). The solution was stirred for 24 h at room temperature, during which a white precipitate was formed. The solids were filtered, and the filtrate was washed with saturated NaHCO<sub>3</sub> solution (2 × 5 mL). The combined organic layers were dried over Na<sub>2</sub>SO<sub>4</sub>, filtered, and concentrated in vacuo. The crude mixture was purified by silica gel column chromatography using a mixture of EtOAc/n-hexane as eluent to give **1t** in 68% yield.

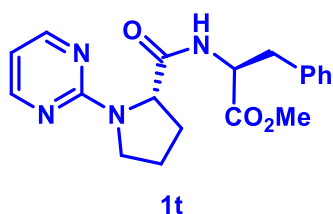

**methyl pyrimidin-2-ylprolylphenylalaninate (1t):** Yield: 68% (2.04 mmol, 722 mg). <sup>1</sup>H NMR (400 MHz, CDCl<sub>3</sub>) δ 8.25 (d, *J* = 4.6 Hz, 2H), 7.53 (d, *J* = 7.8 Hz, 1H), 7.14 – 7.09 (m, 3H), 6.94 (dd, *J* = 6.4, 3.1 Hz, 2H), 6.51 (t, *J* = 4.8 Hz, 1H), 4.89 – 4.84 (m, 1H), 4.60 – 4.53 (m, 1H), 3.67 (s, 3H), 3.63

– 3.57 (m, 1H), 3.56 – 3.47 (m, 1H), 3.13 (dd,  $J = 13.9, 5.5$  Hz, 1H), 2.96 (dd,  $J = 13.9, 6.4$  Hz, 1H), 2.37 – 2.30 (m, 1H), 1.98 – 1.91 (m, 3H).  $^{13}\text{C}$  NMR (101 MHz,  $\text{CDCl}_3$ )  $\delta$  172.2, 172.0, 160.7, 157.7, 136.0, 129.2, 128.3, 126.9, 110.6, 60.8, 53.1, 52.3, 47.7, 37.9, 29.0, 24.4. HRMS calcd. for  $\text{C}_{19}\text{H}_{23}\text{N}_4\text{O}_3$   $[\text{M}+\text{H}]^+$ : 355.1765 Found: 355.1768.

#### Procedure for preparation of substrate 1u

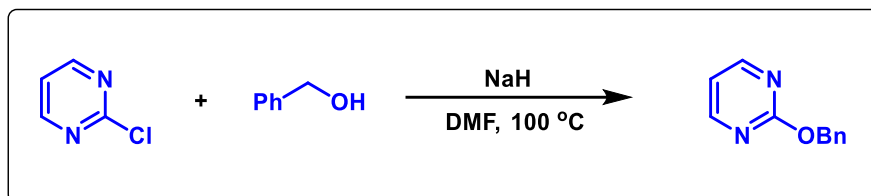

To a solution of benzylalcohol (1.5 equiv.) in DMF was added NaH (1.5 equiv.) slowly, and the reaction mixture was stirred for 1 hour at room temperature. A solution of 2-chloropyrimidine (3 mmol) was added slowly, and then the reaction mixture was stirred overnight at 100 °C. After cooling down, the resulting suspension was quenched with saturated  $\text{NH}_4\text{Cl}$ , diluted with EtOAc, and washed with water and brine. The solvents were removed, and the resulting mixture was purified by silica gel-packed flash chromatography.

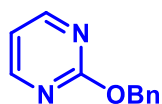

1u

**2-(benzyloxy)pyrimidine (1u):**<sup>11</sup> Yield: 82% (2.46 mmol, 457 mg).  $^1\text{H}$  NMR (500 MHz,  $\text{CDCl}_3$ )  $\delta$  8.51 (d,  $J = 4.8$  Hz, 2H), 7.48 (d,  $J = 7.3$  Hz, 2H), 7.36 (dd,  $J = 10.1, 4.7$  Hz, 2H), 7.32 – 7.28 (m, 1H), 6.92 (t,  $J = 4.8$  Hz, 1H), 5.45 (s, 2H).  $^{13}\text{C}$  NMR (126 MHz,  $\text{CDCl}_3$ )  $\delta$  165.2, 159.4, 136.6, 128.5, 128.0, 115.2, 69.1.

#### Procedure for preparation of substrate 1v

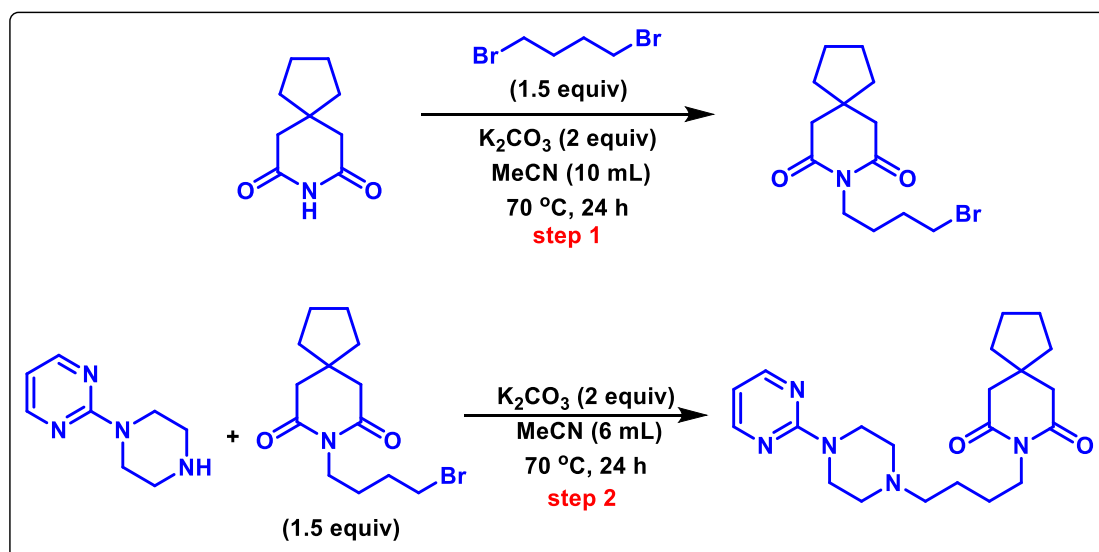

**Step 1:** To a solution of amide (4 mmol) in MeCN (10 mL) was added  $K_2CO_3$  (8 mmol), followed by dropwise addition of 1,4-dibromobutane (6 mmol). The reaction mixture was stirred for 24 hours at 70 °C. The reaction mixture was cooled to room temperature and diluted with water and EtOAc. The organic layer was washed with brine, dried over anhydrous sodium sulfate, filtered, and concentrated *in vacuo*. The product was purified by silica gel column chromatography using a mixture of EtOAc/n-hexane as eluent.

**Step 2:** To a solution of 2-(piperazin-1-yl)pyrimidine (2 mmol) in MeCN (6 mL) was added  $K_2CO_3$  (4 mmol), followed by dropwise addition of alkyl bromide (3 mmol). The reaction mixture was stirred for 24 hours at 70 °C. The reaction mixture was cooled to room temperature and diluted with water and EtOAc. The organic layer was washed with brine, dried over anhydrous sodium sulfate, filtered, and concentrated *in vacuo*. The product was purified by silica gel column chromatography using a mixture of EtOAc/n-hexane as eluent.

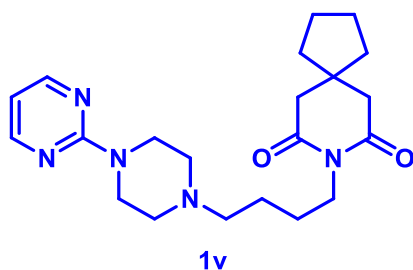

**8-(4-(4-(pyrimidin-2-yl)piperazin-1-yl)butyl)-8-azaspiro[4.5]decane-7,9-dione (1v):** Yield: 72% (1.44 mmol, 555 mg).  $^1H$  NMR (400 MHz,  $CDCl_3$ )  $\delta$  8.28 (d,  $J = 4.8$  Hz, 2H), 6.45 (t,  $J = 4.7$  Hz, 1H), 3.82 – 3.75 (m, 6H), 2.57 (s, 4H), 2.51 – 2.44 (m, 4H), 2.38 (t,  $J = 6.9$  Hz, 2H), 1.73 – 1.66 (m, 4H), 1.53 – 1.46 (m, 8H).  $^{13}C$  NMR (126 MHz,  $CDCl_3$ )  $\delta$  172.3, 161.8, 157.8, 109.9, 58.4, 53.2, 45.0, 43.7, 39.6, 39.4, 37.7, 26.1, 24.3.

**Procedure for preparation of substrates 1k-d**

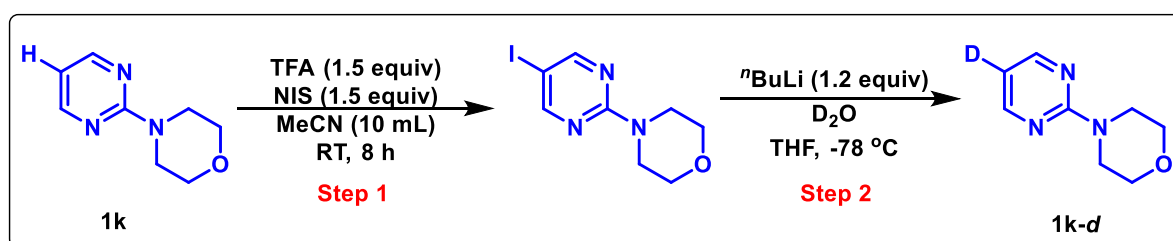

**Step 1:** To a solution of **1k** (3 mmol) in 10 mL of acetonitrile was added NIS (4.5 mmol) and TFA (1.5 equiv), and the resulting solution was stirred at room temperature for 8 h. The reaction mixture was diluted with 30 mL of  $CH_2Cl_2$ , washed with 10% sodium thiosulfate solution (30 mL) and 5%  $NaHCO_3$  (2  $\times$  20 mL), dried over  $MgSO_4$ , filtered, and concentrated *in vacuo* to give a residue which was purified by silica gel column chromatography using a mixture of EtOAc/n-hexane as eluent.

**Step 2:** To an oven-dried, two neck round bottom flask was added 4-(5-iodopyrimidin-2-yl)morpholine (1.5 mmol) and THF (15 mL) under nitrogen condition, the solution was cooled to -78 °C, and *n*-BuLi (1.5 mL, 2.5 M in THF) was added slowly. After stirring for one hour, D<sub>2</sub>O (1 mL) was added to the reaction mixture. After stirring for two hours, the reaction mixture was allowed to warm to room temperature. The mixture was diluted with ethyl acetate, washed with water, dried over Na<sub>2</sub>SO<sub>4</sub>, and concentrated. The product was purified with silica gel chromatography using a mixture of EtOAc/*n*-hexane as eluent to give **1k-d** as a yellow oil (130 mg, 88%).

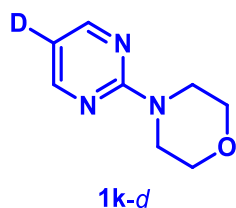

**4-(pyrimidin-2-yl-5-d)morpholine (1k-d):** <sup>1</sup>H NMR (400 MHz, CDCl<sub>3</sub>) δ 8.31 (s, 2H), 6.51 (t, *J* = 4.9 Hz, 0.09H), 3.81 – 3.78 (m, 4H), 3.77 – 3.74 (m, 4H). <sup>13</sup>C NMR (101 MHz, CDCl<sub>3</sub>) δ 161.9, 157.8, 110.4, 67.0, 44.3.

**General procedure for preparation of substrates 1'a-1'h and 1'k**

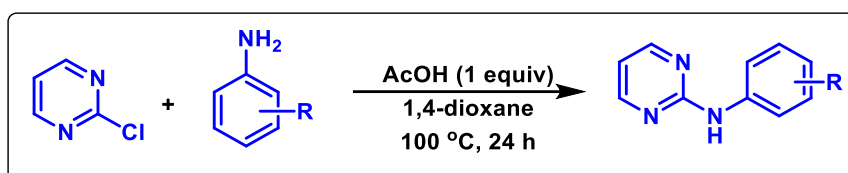

*N*-arylpyrimidin-2-amine derivatives were prepared according to the literature procedure.<sup>17</sup> To an oven-dried flask charged with aniline (7.5 mmol), 2-chloropyrimidine (5.0 mmol), and acetic acid (5 mL) in 1,4-dioxane (14 mL) were added. The reaction mixture was stirred at 110 °C for 24 h and monitored by TLC. Upon completion, the reaction mixture was extracted with EtOAc (3 × 20 mL) and washed with brine. The organic layer was dried over sodium sulfate and concentrated *in vacuo*. The residue was purified by silica gel column chromatography using a mixture of EtOAc/*n*-hexane as eluent.

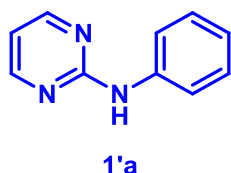

**N-phenylpyrimidin-2-amine (1'a):**<sup>18</sup> Yield: 76% (3.8 mmol, 650 mg) <sup>1</sup>H NMR (400 MHz, CDCl<sub>3</sub>) δ 8.43 (d, *J* = 4.8 Hz, 2H), 7.71 (br s, 1H), 7.65 – 7.61 (m, 2H), 7.41 – 7.31 (m, 2H), 7.06 (t, *J* = 7.4 Hz, 1H), 6.72 (t, *J* = 4.8 Hz, 1H). <sup>13</sup>C NMR (101 MHz, CDCl<sub>3</sub>) δ 160.4, 158.1, 139.5, 129.1, 122.9, 119.7, 112.6.

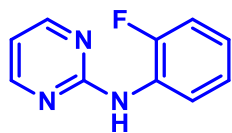

1'b

**N-(2-fluorophenyl)pyrimidin-2-amine (1'b):**<sup>19</sup> Yield: 70% (3.5 mmol, 661 mg) <sup>1</sup>H NMR (500 MHz, CDCl<sub>3</sub>) δ 8.47 – 8.40 (m, 3H), 7.52 (br s, 1H), 7.19 – 7.08 (m, 2H), 7.01 – 6.95 (m, 1H), 6.76 (t, *J* = 4.8 Hz, 1H). <sup>13</sup>C NMR (126 MHz, CDCl<sub>3</sub>) δ 160.1, 158.1, 152.8 (d, *J* = 243.0 Hz), 128.1 (d, *J* = 9.6 Hz), 124.4 (d, *J* = 3.7 Hz), 122.6 (d, *J* = 7.5 Hz), 121.1, 114.9 (d, *J* = 19.4 Hz), 113.2. <sup>19</sup>F NMR (471 MHz, CDCl<sub>3</sub>) δ -131.04 (s).

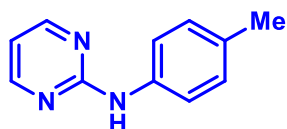

1'c

**N-(p-tolyl)pyrimidin-2-amine (1'c):**<sup>18</sup> Yield: 74% (3.7 mmol, 684 mg) <sup>1</sup>H NMR (400 MHz CDCl<sub>3</sub>) δ 8.40 (d, *J* = 4.8 Hz, 2H), 7.78 (s, 1H), 7.48 (d, *J* = 8.3 Hz, 2H), 7.15 (d, *J* = 8.3 Hz, 2H), 6.67 (t, *J* = 4.8 Hz, 1H), 2.33 (s, 3H). <sup>13</sup>C NMR (126 MHz, CDCl<sub>3</sub>) δ 160.6, 158.1, 136.9, 132.6, 129.6, 120.3, 112.3, 20.9.

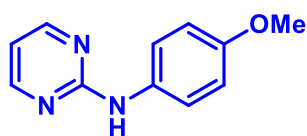

1'd

**N-(4-methoxyphenyl)pyrimidin-2-amine (1'd):**<sup>18</sup> Yield: 79% (3.95 mmol, 794 mg) <sup>1</sup>H NMR (400 MHz, CDCl<sub>3</sub>) δ 8.37 (d, *J* = 4.8 Hz, 2H), 7.51 – 7.44 (m, 2H), 7.36 (br s, 1H), 6.93 – 6.88 (m, 2H), 6.68 – 6.64 (m, 1H), 3.80 (s, 3H). <sup>13</sup>C NMR (126 MHz, CDCl<sub>3</sub>) δ 160.8, 158.2, 156.0, 132.4, 122.4, 114.4, 112.2, 55.7.

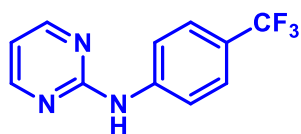

1'e

**N-(4-(trifluoromethyl)phenyl)pyrimidin-2-amine (1'e):**<sup>20</sup> Yield: 74% (3.7 mmol, 884 mg) <sup>1</sup>H NMR (400 MHz, CDCl<sub>3</sub>) δ 8.48 (d, *J* = 4.8 Hz, 2H), 8.06 (br s, 1H), 7.77 (d, *J* = 8.5 Hz, 2H), 7.58 (d, *J* = 8.5 Hz, 2H), 6.81 (t, *J* = 4.8 Hz, 1H). <sup>13</sup>C NMR (126 MHz, CDCl<sub>3</sub>) δ 159.9, 158.2, 142.8, 126.3 (q, <sup>1</sup>*J*<sub>F</sub> = 3.7 Hz), 124.5 (q, <sup>3</sup>*J*<sub>F</sub> = 272.2 Hz), 124.2 (q, <sup>2</sup>*J*<sub>F</sub> = 32.8 Hz), 118.7, 113.5.



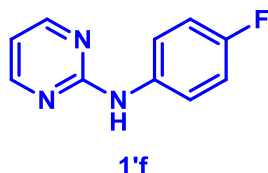

**N-(4-fluorophenyl)pyrimidin-2-amine (1'f):**<sup>20</sup> Yield: 82% (4.1 mmol, 775 mg) **<sup>1</sup>H NMR** (400 MHz, CDCl<sub>3</sub>) δ 8.40 (d, *J* = 4.8 Hz, 2H), 7.59 – 7.51 (m, 2H), 7.36 (br s, 1H), 7.08 – 7.00 (m, 2H), 6.74 – 6.70 (m, 1H). **<sup>13</sup>C NMR** (126 MHz, CDCl<sub>3</sub>) δ 160.3, 158.9 (d, *J* = 241.9 Hz), 158.2, 135.4 (d, *J* = 2.6 Hz), 121.7 (d, *J* = 7.6 Hz), 115.7 (d, *J* = 22.5 Hz), 112.7.

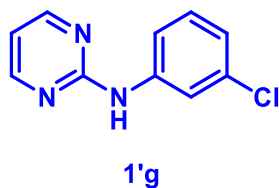

**N-(3-chlorophenyl)pyrimidin-2-amine (1'g):**<sup>18</sup> Yield: 80% (4.0 mmol, 820 mg) **<sup>1</sup>H NMR** (500 MHz, CDCl<sub>3</sub>) δ 8.49 (d, *J* = 4.7 Hz, 2H), 7.92 – 7.87 (m, 1H), 7.55 (br s, 1H), 7.43 (d, *J* = 8.2 Hz, 1H), 7.31 – 7.27 (m, 1H), 7.05 (dd, *J* = 7.9, 0.8 Hz, 1H), 6.81 (t, *J* = 4.8 Hz, 1H). **<sup>13</sup>C NMR** (126 MHz, CDCl<sub>3</sub>) δ 159.9, 158.1, 140.8, 134.8, 130.0, 122.7, 119.3, 117.4, 113.2.

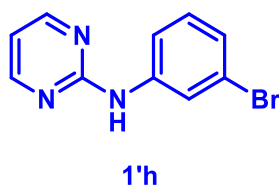

**N-(3-bromophenyl)pyrimidin-2-amine (1'h):**<sup>21</sup> Yield: 55% (2.2 mmol, 545 mg) **<sup>1</sup>H NMR** (500 MHz, CDCl<sub>3</sub>) δ 8.45 (d, *J* = 4.8 Hz, 2H), 7.99 (t, *J* = 1.8 Hz, 1H), 7.64 (s, 1H), 7.46 (dt, *J* = 7.4, 2.0 Hz, 1H), 7.21 – 7.15 (m, 2H), 6.77 (t, *J* = 4.8 Hz, 1H). **<sup>13</sup>C NMR** (126 MHz, CDCl<sub>3</sub>) δ 160.0, 158.1, 141.0, 130.3, 125.5, 122.8, 122.2, 117.9, 113.2.

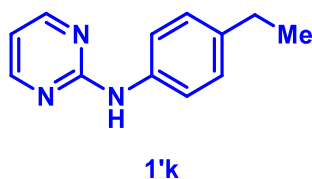

**N-(4-ethylphenyl)pyrimidin-2-amine (1'k):**<sup>22</sup> Yield: 59% (2.95 mmol, 587 mg). **<sup>1</sup>H NMR** (500 MHz, CDCl<sub>3</sub>) δ 8.40 (d, *J* = 4.8 Hz, 2H), 7.95 (br s, 1H), 7.52 (d, *J* = 8.4 Hz, 2H), 7.19 (d, *J* = 8.4 Hz, 2H), 6.67 (t, *J* = 4.8 Hz, 1H), 2.64 (q, *J* = 7.6 Hz, 2H), 1.24 (t, *J* = 7.6 Hz, 3H). **<sup>13</sup>C NMR** (126 MHz, CDCl<sub>3</sub>) δ 160.6, 158.1, 139.1, 137.1, 128.4, 120.4, 112.2, 28.4, 15.8.

### Procedure for preparation of substrate 1'i

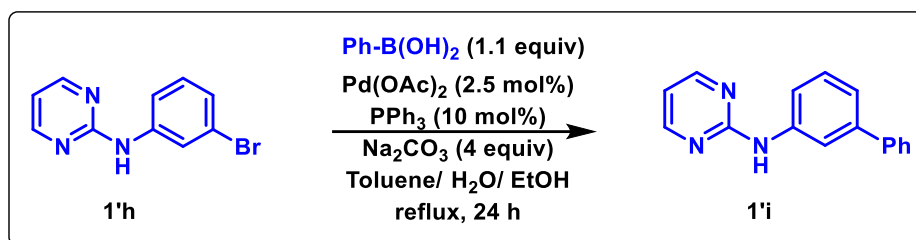

**1'i** was prepared by the following procedure. An oven-dried two-neck round bottom flask equipped with a reflux condenser and a stir bar. **1'h** (3 mmol), phenylboronic acid (1.1 equiv),  $\text{Pd(OAc)}_2$  (2.5 mol%),  $\text{PPh}_3$  (10 mol%),  $\text{Na}_2\text{CO}_3$  (4 equiv) and Toluene/ $\text{H}_2\text{O}$ /EtOH (25 mL, 5/1/1) were taken under  $\text{N}_2$ . The reaction mixture was stirred at reflux overnight. To quench 1M NaOH was added. The reaction mixture was extracted with DCM (3× 20 mL), dried over  $\text{Na}_2\text{SO}_4$ , and concentrated in vacuo. The crude residue was purified by silica-gel column chromatography using a mixture of EtOAc/n-hexane as an eluent to give the title product **1'i** as a white solid.

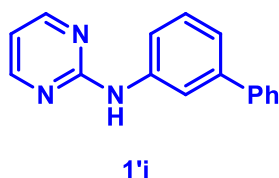

**N-([1,1'-biphenyl]-3-yl)pyrimidin-2-amine (1'i)**: Yield: 72% (2.16 mmol, 533 mg).  $^1\text{H NMR}$  (500 MHz,  $\text{CDCl}_3$ )  $\delta$  8.44 (d,  $J = 4.8$  Hz, 2H), 7.86 (t,  $J = 1.9$  Hz, 1H), 7.74 (br s, 1H), 7.66 – 7.61 (m, 3H), 7.47 – 7.40 (m, 3H), 7.38 – 7.34 (m, 1H), 7.31 – 7.29 (m, 1H), 6.74 (t,  $J = 4.8$  Hz, 1H).  $^{13}\text{C NMR}$  (126 MHz,  $\text{CDCl}_3$ )  $\delta$  160.1, 158.1, 142.3, 141.3, 139.8, 129.4, 128.9, 127.5, 127.4, 122.0, 118.8, 118.7, 112.6. **HRMS** calcd. for  $\text{C}_{16}\text{H}_{14}\text{N}_3$   $[\text{M}+\text{H}]^+$ : 248.1182 Found: 248.1181.

### Procedure for preparation of substrate 1'j

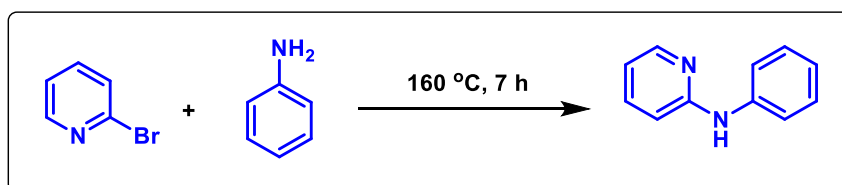

To an oven-dried flask containing 2-bromopyridine (5.0 mmol), aniline (5.0 mmol) was added. The reaction mixture was stirred at 160 °C for 7 h and monitored by TLC. Upon completion, saturated  $\text{NaHCO}_3$  was added, and the reaction mixture was extracted with ethyl acetate (3×30 mL). The combined organic phase was washed with brine and dried over  $\text{Na}_2\text{SO}_4$ . After that, the solid was filtered off through a thin pad of celite, and the filtrate was evaporated in a vacuum to give the crude product which was purified by column chromatography on silica gel to give **1'j** as a white solid. 52% yield

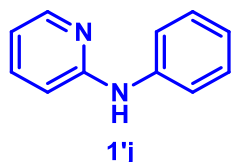

**N-phenylpyridin-2-amine (1'j):**<sup>18</sup> Yield: 52% (2.6 mmol, 442 mg). <sup>1</sup>H NMR (400 MHz, CDCl<sub>3</sub>) δ 8.21 (ddd, *J* = 5.0, 1.9, 0.9 Hz, 1H), 7.52 – 7.46 (m, 1H), 7.34 (dd, *J* = 4.1, 3.6 Hz, 4H), 7.09 – 7.02 (m, 1H), 6.89 (d, *J* = 8.4 Hz, 1H), 6.82 (br s, 1H), 6.76 – 6.71 (m, 1H). <sup>13</sup>C NMR (101 MHz, CDCl<sub>3</sub>) δ 156.2, 148.6, 140.6, 137.8, 129.4, 122.9, 120.5, 115.1, 108.3.

**Table S2.** Preparation of polyfluoroarene substrates

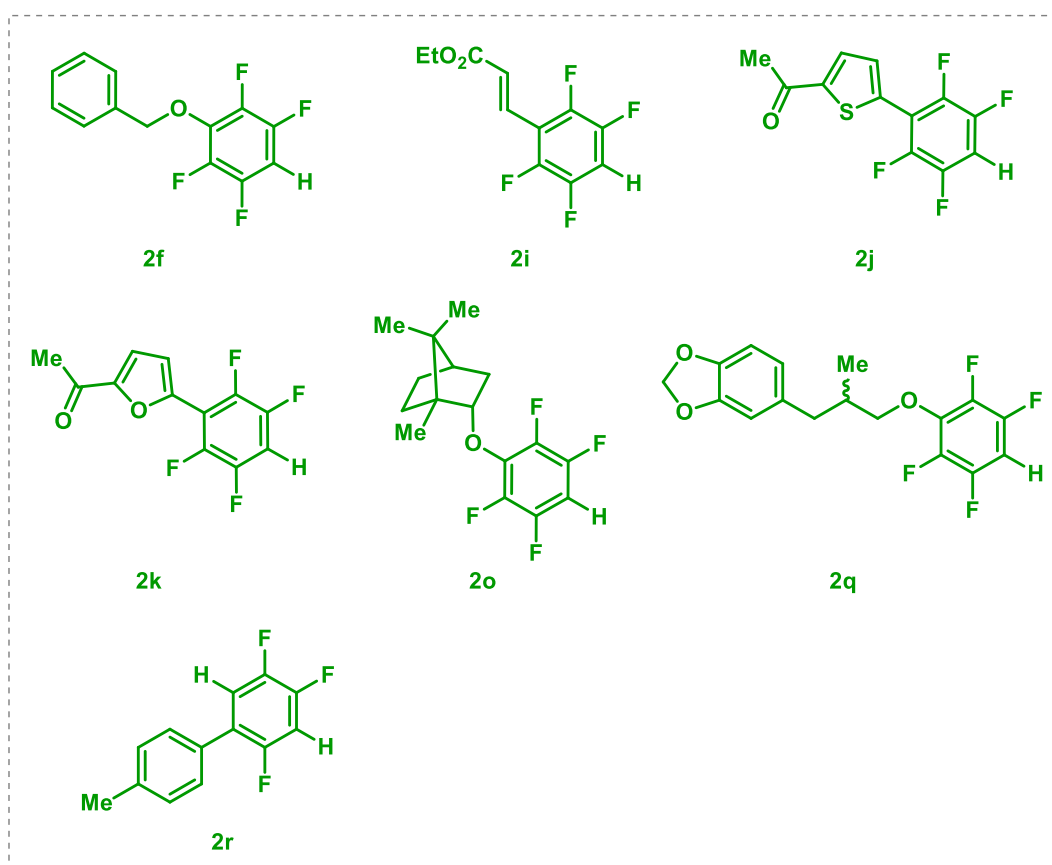

Polyfluoroarenes **2f**, **2i-2k**, **2o**, **2q** and **2r** were prepared by following the reported literature procedures, and the rest of the polyfluoroarenes were previously synthesized<sup>2</sup> and characterized by our group or commercially available.

**Procedure for preparation of substrates 2f, 2o and 2q**

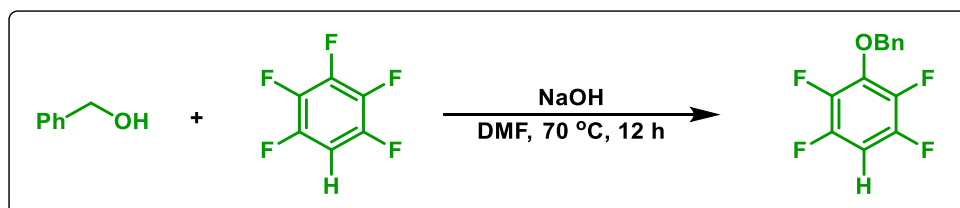

Polyfluoroarene **2f**, **2o**, and **2q** were prepared by following the literature procedures.<sup>23</sup> To an oven-dried round bottom flask were added benzyl alcohol (5 mmol), pentafluorobenzene (6 mmol), and sodium hydroxide (1.5 equiv) in anhydrous DMF (5 mL). The reaction was capped and stirred at 70 °C for 12 h. The reaction mixture was cooled to room temperature, quenched with water (30 mL), and extracted with EtOAc (3 x 50 mL). The combined organic layers were dried over Na<sub>2</sub>SO<sub>4</sub>, filtered, and concentrated *in vacuo*. The crude mixture was purified by silica gel column chromatography using a mixture of EtOAc/n-hexane as eluent.

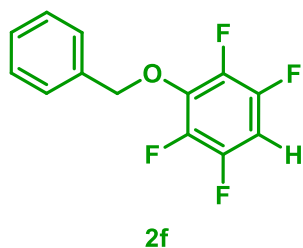

**3-(benzyloxy)-1,2,4,5-tetrafluorobenzene (2f):**<sup>23</sup> Yield: 64% (3.2 mmol, 819 mg). <sup>1</sup>H NMR (500 MHz, CDCl<sub>3</sub>) δ 7.44 (d, *J* = 6.6 Hz, 2H), 7.38 (td, *J* = 8.4, 4.5 Hz, 3H), 6.76 (tt, *J* = 10.0, 7.0 Hz, 1H), 5.26 (s, 2H). <sup>13</sup>C NMR (101 MHz, CDCl<sub>3</sub>) δ 147.8 – 147.5 (m), 145.3 – 145.0 (m), 142.8 – 142.6 (m), 140.4 – 140.1 (m), 137.8 – 137.5 (m), 135.7, 129.0, 128.8, 128.5, 99.9 (t, *J* = 23.1 Hz), 76.5 (t, *J* = 3.6 Hz).

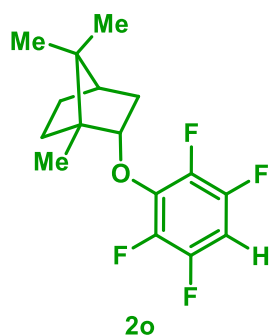

**(1S,2S,4R)-1,7,7-trimethyl-2-(2,3,5,6-tetrafluorophenoxy)bicyclo[2.2.1]heptane (2o):** Yield: 43% (1.7 mmol, 519 mg). <sup>1</sup>H NMR (400 MHz, CDCl<sub>3</sub>) δ 6.73 (tt, *J* = 9.9, 7.0 Hz, 6H), 4.50 (dd, *J* = 9.7, 1.5 Hz, 6H), 2.26 (dq, *J* = 7.8, 5.3 Hz, 13H), 1.79 (ddd, *J* = 10.0, 8.9, 5.1 Hz, 7H), 1.41 – 1.24 (m, 22H), 0.95 (s, 18H), 0.90 (s, 18H), 0.87 (s, 18H). <sup>13</sup>C NMR (126 MHz, CDCl<sub>3</sub>) δ 147.5 (dt, *J* = 12.6, 6.2 Hz), 145.5 (td, *J* = 12.7, 4.1 Hz), 142.6 – 142.2 (m), 140.7 – 140.2 (m), 139.0 (tq, *J* = 10.6, 3.5 Hz), 99.2, 99.0, 98.8, 91.5 (d, *J* = 2.5 Hz), 50.4, 48.2, 45.1, 36.4, 28.2, 26.3, 19.9, 19.0, 13.5. <sup>19</sup>F NMR (376 MHz, CDCl<sub>3</sub>) δ -145.55 (ddd, *J* = 10.5, 8.9, 4.5 Hz), -155.27 (dd, *J* = 23.3, 9.4 Hz). HRMS calcd. for C<sub>16</sub>H<sub>17</sub>F<sub>4</sub>O [M-H]<sup>-</sup>: 301.1221 Found: 301.1224.

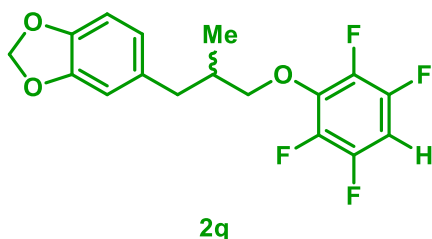

**5-(2-methyl-3-(2,3,5,6-tetrafluorophenoxy)propyl)benzo[d][1,3]dioxole (2q):** Yield; 37% (1.5 mmol, 506 mg).  $^1\text{H NMR}$  (400 MHz,  $\text{CDCl}_3$ )  $\delta$  6.80 – 6.71 (m, 1H), 6.68 (d,  $J = 1.4$  Hz, 1H), 6.63 (dd,  $J = 7.9, 1.5$  Hz, 1H), 5.93 (s, 2H), 4.04 (p,  $J = 9.2$  Hz, 2H), 2.82 (dd,  $J = 13.6, 6.4$  Hz, 1H), 2.47 (dd,  $J = 13.6, 7.9$  Hz, 1H), 2.23 – 2.08 (m, 1H), 1.04 (d,  $J = 6.8$  Hz, 3H).  $^{13}\text{C NMR}$  (126 MHz,  $\text{CDCl}_3$ )  $\delta$  147.8 – 147.3 (m), 146.1, 145.5 (td,  $J = 12.8, 4.1$  Hz), 142.5 – 142.1 (m), 140.4 – 140.1 (m), 138.7 (tt,  $J = 11.9, 3.6$  Hz), 133.8, 122.2, 109.6, 108.2, 100.9, 99.6, 99.4, 99.2, 79.2, 39.1, 36.3, 16.4.  $^{19}\text{F NMR}$  (376 MHz,  $\text{CDCl}_3$ )  $\delta$  -139.27 – -140.77 (m), -156.85 (dt,  $J = 17.3, 9.8$  Hz). **HRMS** calcd. for  $\text{C}_{17}\text{H}_{15}\text{F}_4\text{O}_3$   $[\text{M}+\text{H}]^+$ : 343.0952 Found: 303.0953.

#### Procedure for preparation of substrate 2i

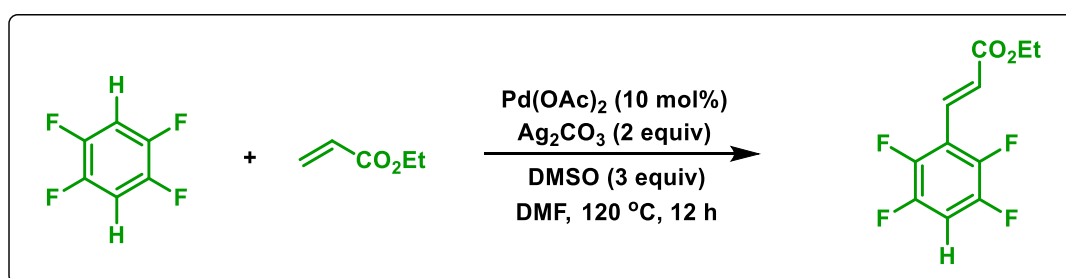

To an oven-dried 25 mL sealed tube were added  $\text{Pd}(\text{OAc})_2$  (10 mol%) and  $\text{Ag}_2\text{CO}_3$  (2.0 equiv) under  $\text{N}_2$ , followed by DMF (2.4 mL) and DMSO (3 equiv) with stirring. Next, 1,2,4,5-tetrafluorobenzene (0.6 mmol, 1.0 equiv) and ethyl acrylate (1.0 equiv) were added subsequently. The sealed tube was screw-capped and kept in a preheated oil bath at 120 °C. A total of three batches of this reaction were kept. After stirring for 12 h, the reaction mixture was cooled to room temperature and diluted with ethyl acetate, washed with 1 N HCl and brine, dried over  $\text{Na}_2\text{SO}_4$ , filtered, and concentrated *in vacuo*. The residue was purified with silica gel chromatography to provide the product.

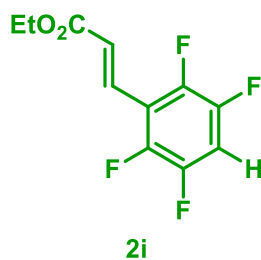

**ethyl (E)-3-(2,3,5,6-tetrafluorophenyl)acrylate (2i):**<sup>24</sup> Combined yield: 24% (0.43 mmol, 107 mg).  $^1\text{H NMR}$  (400 MHz,  $\text{CDCl}_3$ )  $\delta$  7.70 (d,  $J = 16.5$  Hz, 1H), 7.09 (dq,  $J = 9.4, 7.5$  Hz, 1H), 6.78 (d,  $J =$

16.5 Hz, 1H), 4.30 (q,  $J = 7.1$  Hz, 2H), 1.35 (t,  $J = 7.1$  Hz, 3H).  $^{13}\text{C}$  NMR (101 MHz,  $\text{CDCl}_3$ )  $\delta$  166.3, 147.5 – 147.2 (m), 146.6 – 146.4 (m), 145.1 – 144.8 (m), 144.2 – 143.9 (m), 143.2 – 142.9 (m) 129.2, 126.9 (t,  $J = 8.7$  Hz), 106.9 (t,  $J = 22.7$  Hz), 61.2, 14.4.

#### General procedure for preparation of substrates **2j** and **2k**

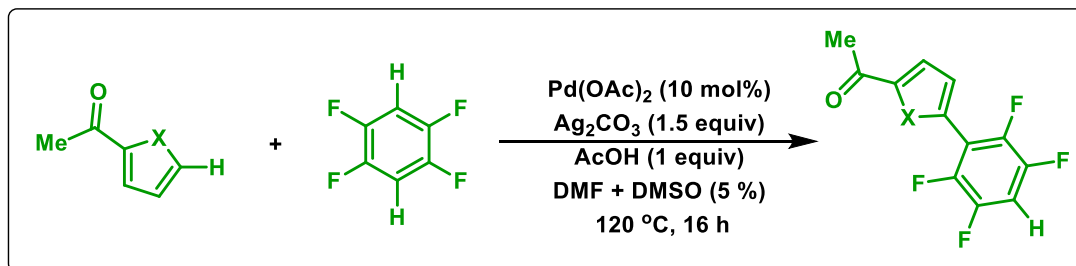

Polyfluoroarenes **2j** and **2k** were prepared according to the literature procedure.<sup>25</sup> To an oven-dried 25 mL sealed tube, were added  $\text{Pd}(\text{OAc})_2$  (10 mol%) and  $\text{Ag}_2\text{CO}_3$  (1.5 equiv) under  $\text{N}_2$ , followed by solvent (2 mL) and additive with stirring. 1,2,4,5-tetrafluorobenzene (2.0 equiv) and heteroarene (thiophene or furan) (0.6 mmol, 1 equiv) were then added subsequently. The sealed tube was screw-capped and heated to 120 °C (oil bath). Two batches of this reaction were kept with 0.6 mmol each. After stirring for 16 h, the reaction mixture was cooled to room temperature, and the reaction mixture was diluted with ethyl acetate, washed with 1 N HCl and brine, dried over  $\text{Na}_2\text{SO}_4$ , filtered, and concentrated. The crude residue was purified with silica gel chromatography using a mixture of EtOAc/n-hexane as eluent to provide the pure product.

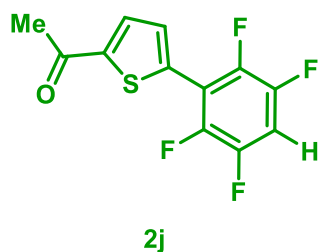

**1-(5-(2,3,5,6-tetrafluorophenyl)thiophen-2-yl)ethan-1-one (2j):** Combined yield: 71% (1.2 mmol, 233 mg).  $^1\text{H}$  NMR (400 MHz,  $\text{CDCl}_3$ )  $\delta$  7.72 (d,  $J = 3.7$  Hz, 1H), 7.59 – 7.55 (m, 1H), 7.09 (tt,  $J = 9.3$ , 7.3 Hz, 1H), 2.60 (s, 3H).  $^{13}\text{C}$  NMR (126 MHz,  $\text{CDCl}_3$ )  $\delta$  190.7, 147.5 (ddd,  $J = 14.7$ , 10.6, 4.2 Hz), 146.0 (t,  $J = 3.5$  Hz), 145.5 (ddd,  $J = 14.8$ , 10.6, 4.2 Hz), 144.8 (dt,  $J = 15.0$ , 4.3 Hz), 142.8 (dt,  $J = 14.8$ , 4.3 Hz), 135.7 – 135.1 (m), 132.0, 131.1 (t,  $J = 5.8$  Hz), 114.3 (t,  $J = 14.6$  Hz), 105.9, 105.7, 105.5, 27.0.  $^{19}\text{F}$  NMR (376 MHz,  $\text{CDCl}_3$ )  $\delta$  -137.95 – -138.13 (m), -139.12 – -139.29 (m). HRMS calcd. for  $\text{C}_{12}\text{H}_7\text{F}_4\text{OS}$   $[\text{M}+\text{H}]^+$ : 275.0148 Found: 275.0145.

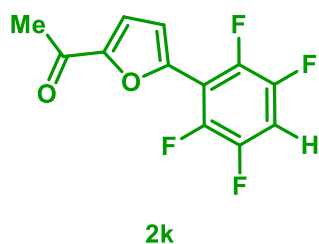

**1-(5-(2,3,5,6-tetrafluorophenyl)furan-2-yl)ethan-1-one (2k):** Combined yield: 82% (1.2 mmol, 254 mg).  $^1\text{H NMR}$  (400 MHz,  $\text{CDCl}_3$ )  $\delta$  7.30 (d,  $J = 3.8$  Hz, 1H), 7.11 (tt,  $J = 9.3, 7.3$  Hz, 1H), 7.03 (dt,  $J = 3.7, 1.8$  Hz, 1H), 2.56 (s, 3H).  $^{13}\text{C NMR}$  (126 MHz,  $\text{CDCl}_3$ )  $\delta$  190.7, 147.5 (ddd,  $J = 14.7, 10.6, 4.2$  Hz), 146.0 (t,  $J = 3.5$  Hz), 145.5 (ddd,  $J = 14.8, 10.6, 4.2$  Hz), 144.8 (dt,  $J = 15.0, 4.3$  Hz), 142.8 (dt,  $J = 14.8, 4.3$  Hz), 135.7 – 135.1 (m), 132.0, 131.1 (t,  $J = 5.8$  Hz), 114.3 (t,  $J = 14.6$  Hz), 105.9, 105.7, 105.5, 27.0.  $^{19}\text{F NMR}$  (376 MHz,  $\text{CDCl}_3$ )  $\delta$  -137.97 – -138.29 (m), -139.97 – -140.43 (m). **HRMS** calcd. for  $\text{C}_{12}\text{H}_7\text{F}_4\text{O}_2$   $[\text{M}+\text{H}]^+$ : 259.0377 Found: 259.0379.

### Procedure for preparation of substrates 2r

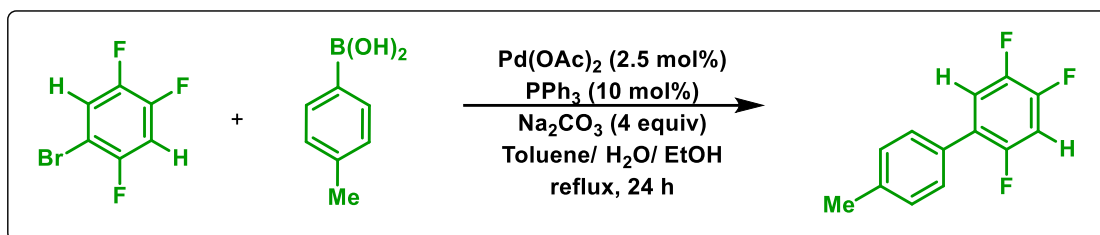

**2r** was prepared by the following procedure. An oven-dried two-neck round bottom flask equipped with a reflux condenser and a stir bar. 1-bromo-2,4,5-trifluorobenzene (3 mmol), 4-methylphenylboronic acid (1.1 equiv),  $\text{Pd}(\text{OAc})_2$  (2.5 mol%),  $\text{PPh}_3$  (10 mol%),  $\text{Na}_2\text{CO}_3$  (4 equiv) and Toluene/ $\text{H}_2\text{O}$ / $\text{EtOH}$  (25 mL, 5/1/1) were taken under  $\text{N}_2$ . The reaction mixture was stirred at reflux overnight. To quench 1M  $\text{NaOH}$  was added. The reaction mixture was extracted with  $\text{DCM}$  ( $3 \times 20$  mL), dried over  $\text{Na}_2\text{SO}_4$ , and concentrated in vacuo. The crude residue was purified by silica-gel column chromatography using a mixture of  $\text{EtOAc}/n$ -hexane as an eluent to give the title product **2r** as colorless oil.

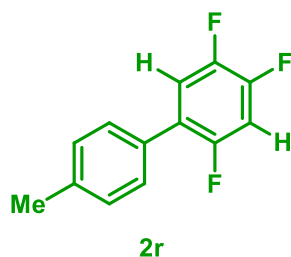

**2,4,5-trifluoro-4'-methyl-1,1'-biphenyl (2r):**<sup>26</sup> Combined yield: 83% (2.48 mmol, 552 mg).  $^1\text{H NMR}$  (400 MHz,  $\text{CDCl}_3$ )  $\delta$  7.42 – 7.37 (m, 2H), 7.30 – 7.20 (m, 3H), 7.01 (td,  $J = 10.0, 6.7$  Hz, 1H), 2.41 (s, 3H).  $^{13}\text{C NMR}$  (126 MHz,  $\text{CDCl}_3$ )  $\delta$  155.8 (dd,  $J = 9.2, 2.5$  Hz), 153.8 (dd,  $J = 9.1, 2.1$  Hz), 150.2 (dd,  $J = 14.3, 12.3$  Hz), 148.3 – 148.0 (m), 146.1 (dd,  $J = 12.6, 3.6$  Hz), 138.3, 131.2, 129.5, 128.8 (d,  $J =$

2.9 Hz), 125.7 – 125.5 (m), 118.2 (dd,  $J = 19.5, 5.0$  Hz), 106.2 (dd,  $J = 29.1, 20.7$  Hz), 21.3.  $^{19}\text{F}$  NMR (376 MHz,  $\text{CDCl}_3$ )  $\delta$  -119.23 – -119.48 (m), -135.48 (ddd,  $J = 7.6, 4.2, 1.9$  Hz), -142.74 – -143.05 (m).

### 3. Optimization studies for C5-H and N-H polyfluoroarylation of 2-aminopyrimidines

**Table S3.** Optimization of the reaction conditions for C5-H polyfluoroarylation<sup>a</sup>

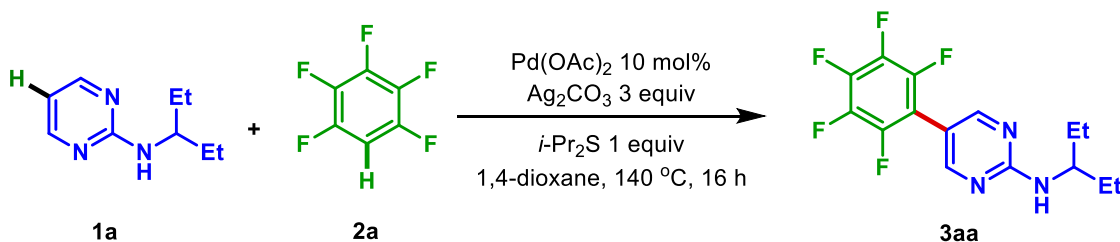

| Entry | Deviation from above                                                                              | Yield (%) <sup>b</sup> |
|-------|---------------------------------------------------------------------------------------------------|------------------------|
| 1     | none                                                                                              | 94                     |
| 2     | $\text{AgOAc}$ instead of $\text{Ag}_2\text{CO}_3$                                                | 61                     |
| 3     | $\text{AgNO}_3$ instead of $\text{Ag}_2\text{CO}_3$                                               | 55                     |
| 4     | $\text{Ag}_2\text{O}$ instead of $\text{Ag}_2\text{CO}_3$                                         | 26                     |
| 5     | 1 equiv $\text{Ag}_2\text{CO}_3 + \text{O}_2$ (1 atm) instead of 3 equiv $\text{Ag}_2\text{CO}_3$ | 38                     |
| 6     | 1,4-Benzoquinone instead $\text{Ag}_2\text{CO}_3$                                                 | n.d.                   |
| 7     | DMSO instead of $i\text{-Pr}_2\text{S}$                                                           | 38                     |
| 8     | PhSMe instead of $i\text{-Pr}_2\text{S}$                                                          | 64                     |
| 9     | 20 mol% pyridine instead of $i\text{-Pr}_2\text{S}$                                               | 15                     |
| 10    | DMF instead of 1,4-dioxane                                                                        | 12                     |
| 11    | DCE instead of 1,4-dioxane                                                                        | 8                      |
| 12    | MeCN instead of 1,4-dioxane                                                                       | trace                  |
| 13    | DMSO instead of 1,4-dioxane                                                                       | 36                     |
| 14    | 120 °C instead of 140 °C                                                                          | 58                     |
| 15    | 24 h instead of 16 h                                                                              | 92                     |

<sup>a</sup>Reaction conditions: **1a** (0.1 mmol), **2a** (0.2 mmol),  $\text{Pd}(\text{OAc})_2$  (10 mol%),  $\text{Ag}_2\text{CO}_3$  (3 equiv),  $i\text{-Pr}_2\text{S}$  (1 equiv), 1,4-dioxane (0.5 mL), 140 °C, 16 h. <sup>b</sup>Isolated yield. n.d. = not detected.



**Table S4.** Screening of metal salts<sup>a</sup>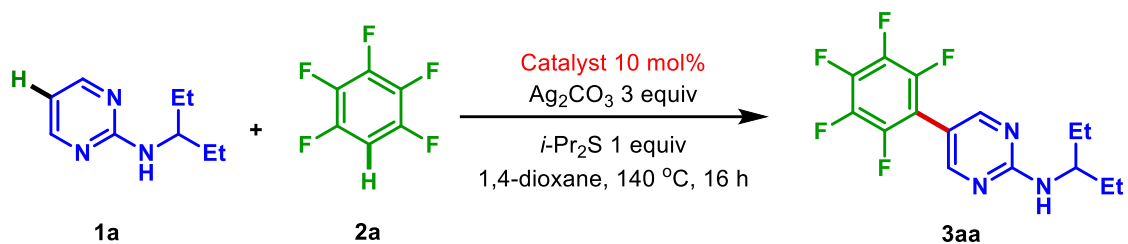

| Entry    | Catalyst                                            | Yield (%) <sup>b</sup> |
|----------|-----------------------------------------------------|------------------------|
| 1        | $\text{Co}(\text{OAc})_2$                           | n.d.                   |
| 2        | $\text{Ni}(\text{OAc})_2 \cdot 4\text{H}_2\text{O}$ | n.d.                   |
| 3        | $\text{PdCl}_2$                                     | 10                     |
| <b>4</b> | <b><math>\text{Pd}(\text{OAc})_2</math></b>         | <b>94</b>              |

<sup>a</sup>Reaction conditions: **1a** (0.1 mmol), **2a** (0.2 mmol), catalyst (10 mol%),  $\text{Ag}_2\text{CO}_3$  (3 equiv),  $i\text{-Pr}_2\text{S}$  (1 equiv), 1,4-dioxane (0.5 mL), 140 °C, 16 h. <sup>b</sup>Isolated yield.

**Table S5.** Optimization of equivalency of  $i\text{-Pr}_2\text{S}$ <sup>a</sup>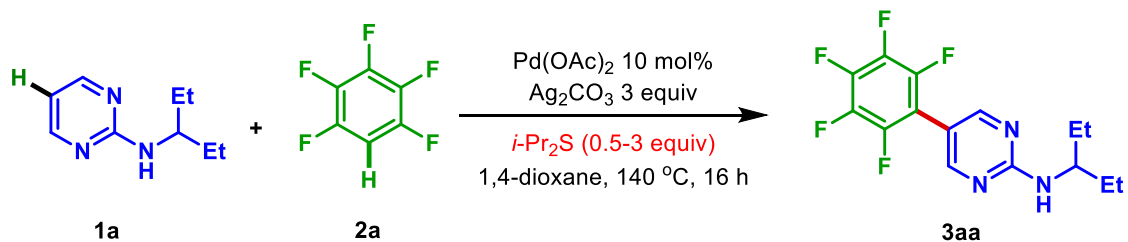

| Entry    | Equivalency of $i\text{-Pr}_2\text{S}$ | Yield (%) <sup>b</sup> |
|----------|----------------------------------------|------------------------|
| 1        | 0.5                                    | 68                     |
| <b>2</b> | <b>1</b>                               | <b>94</b>              |
| 3        | 3                                      | 95                     |

<sup>a</sup>Reaction conditions: **1a** (0.1 mmol), **2a** (0.2 mmol),  $\text{Pd}(\text{OAc})_2$  (10 mol%),  $\text{Ag}_2\text{CO}_3$  (3 equiv),  $i\text{-Pr}_2\text{S}$  (0.5-3 equiv), 1,4-dioxane (0.5 mL), 140 °C, 16 h. <sup>b</sup>Isolated yield.

**Table S6:** Control experiments<sup>a</sup>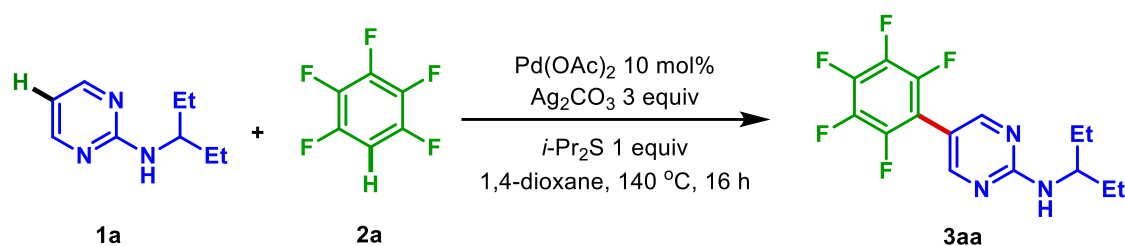

| Entry | Deviation from above                    | Yield (%) <sup>b</sup> |
|-------|-----------------------------------------|------------------------|
| 1     | Without Ag <sub>2</sub> CO <sub>3</sub> | 10                     |
| 2     | Without <i>i</i> -Pr <sub>2</sub> S     | 35                     |
| 3     | Without Pd(OAc) <sub>2</sub>            | n.d.                   |

<sup>a</sup>Reaction conditions: **1a** (0.1 mmol), **2a** (0.2 mmol), Pd(OAc)<sub>2</sub> (10 mol%), Ag<sub>2</sub>CO<sub>3</sub> (3 equiv), *i*-Pr<sub>2</sub>S (1 equiv), 1,4-dioxane (0.5 mL), 140 °C, 16 h. <sup>b</sup>Isolated yield. n.d. = not detected.

**Table S7.** Optimization of the reaction conditions for N-H polyfluoroarylation<sup>a</sup>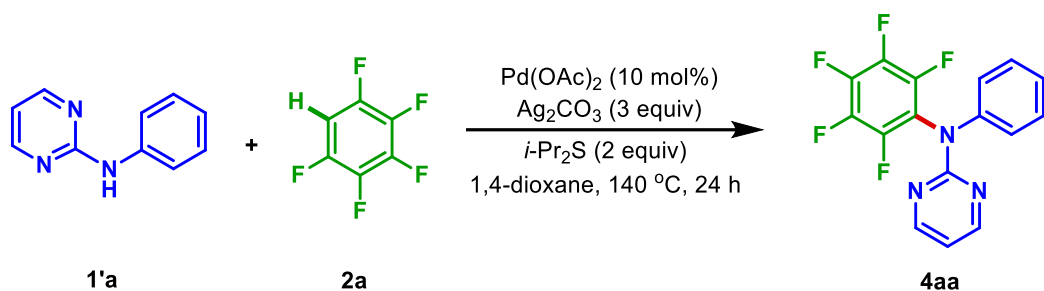

| Entry    | Deviation from above                                          | Yield (%) <sup>b</sup> |
|----------|---------------------------------------------------------------|------------------------|
| <b>1</b> | <b>none</b>                                                   | <b>56</b>              |
| 2        | AgOAc instead of Ag <sub>2</sub> CO <sub>3</sub>              | 37                     |
| 3        | 2 equiv of Ag <sub>2</sub> CO <sub>3</sub> instead of 3 equiv | 41                     |
| 4        | 130 °C instead of 140 °C                                      | 36                     |
| 5        | PhSMe instead of <i>i</i> -Pr <sub>2</sub> S                  | 32                     |
| 6        | 1 equiv of <i>i</i> -Pr <sub>2</sub> S instead of 3 equiv     | 35                     |
| 7        | 36 h instead of 24 h                                          | 53                     |
| 8        | Without <i>i</i> -Pr <sub>2</sub> S                           | 12                     |
| 9        | Without Ag <sub>2</sub> CO <sub>3</sub>                       | n.d.                   |
| 10       | Without Pd(OAc) <sub>2</sub>                                  | n.d.                   |

<sup>a</sup>Reaction conditions: **1'a** (0.1 mmol), **2a** (0.2 mmol), Pd(OAc)<sub>2</sub> (10 mol%), Ag<sub>2</sub>CO<sub>3</sub> (3 equiv), *i*-Pr<sub>2</sub>S (2 equiv), 1,4-dioxane (0.5 mL), 140 °C, 24 h. <sup>b</sup>Isolated yield. n.d. = not detected.

#### 4. General procedure for Pd-catalyzed C-5 polyfluoroarylation of 2-aminopyrimidines

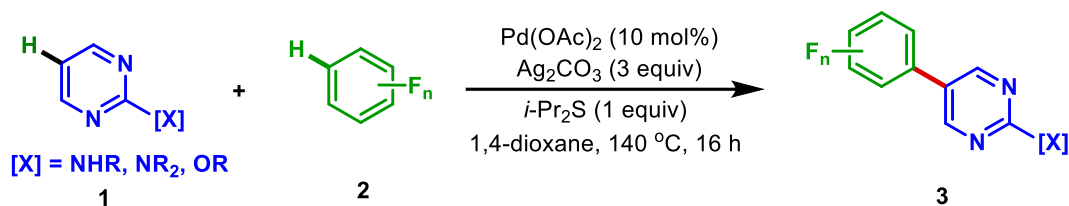

An oven-dried screw cap reaction tube was charged with a magnetic stir-bar, 2-aminopyrimidine substrate **1** (0.1 mmol, 1.0 equiv), Pd(OAc)<sub>2</sub> (10 mol%, 0.01 mmol, 2.3 mg) and Ag<sub>2</sub>CO<sub>3</sub> (0.3 mmol, 3 equiv, 82 mg) were taken in air. Subsequently, 1,4-dioxane (0.5 mL), polyfluoroarene **2** (0.4 mmol, 2 equiv), and isopropyl sulfide (0.1 mmol, 1 equiv, 14  $\mu$ L) were added. The reaction tube was capped tightly and placed in a preheated oil bath at 140  $^\circ$ C. The reaction mixture was stirred vigorously for 16 h. After that, the resulting mixture was diluted with EtOAc, filtered through a plug of Celite, and concentrated under reduced pressure. The purification was carried out by column chromatography over silica gel using a mixture of EtOAc/n-hexane as eluent to afford the C-H polyfluoroarylated products **3**.

#### 5. General procedure for Pd-catalyzed N-H polyfluoroarylation of *N*-phenylpyrimidin-2-amines

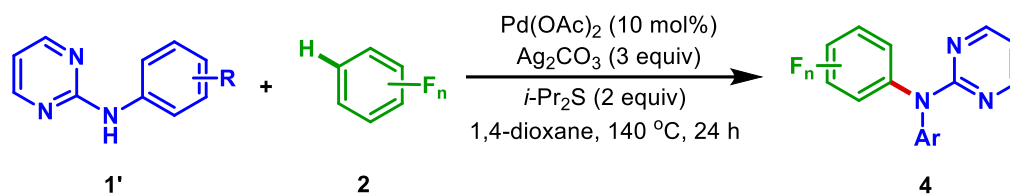

An oven-dried screw cap reaction tube was charged with a magnetic stir-bar, *N*-arylpyrimidin-2-amine substrate **1'** (0.1 mmol, 1.0 equiv), Pd(OAc)<sub>2</sub> (10 mol%, 0.01 mmol, 2.3 mg) and Ag<sub>2</sub>CO<sub>3</sub> (0.3 mmol, 3 equiv, 82 mg) were taken in air. Subsequently, 1,4-dioxane (0.5 mL), polyfluoroarene **2** (0.5 mmol, 2 equiv), and isopropyl sulfide (0.2 mmol, 2 equiv, 29  $\mu$ L) were added. The reaction tube was capped tightly and placed in a preheated oil bath at 140  $^\circ$ C. The reaction mixture was stirred vigorously for 24 h. After that, the resulting mixture was diluted with EtOAc, filtered through a plug of Celite, and concentrated under reduced pressure. The purification was carried out by column chromatography over silica gel using a mixture of EtOAc/n-hexane as eluent to afford the C-H polyfluoroarylated products **4**.

## 6. Characterisation of product 3 and 4

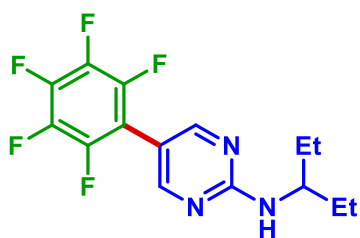

**3aa**

**N-(pentan-3-yl)-5-(perfluorophenyl)pyrimidin-2-amine (3aa):** Yield: 94% (0.094 mmol, 31 mg).  $^1\text{H}$  NMR (400 MHz,  $\text{CDCl}_3$ )  $\delta$  8.33 (s, 2H), 5.53 (s, 1H), 1.47 (s, 9H).  $^{13}\text{C}$  NMR (126 MHz,  $\text{CDCl}_3$ )  $\delta$  161.8, 158.2, 145.4 – 145.0 (m), 143.4 – 143.2 (m), 141.7 – 141.1 (m), 139.6 – 138.9 (m), 137.4 – 136.8 (m), 111.1 (td,  $J = 16.9, 4.0$  Hz), 109.6, 51.5, 28.9.  $^{19}\text{F}$  (376 MHz,  $\text{CDCl}_3$ )  $\delta$  -143.47 (d,  $J = 22.8$  Hz), -155.34 (td,  $J = 20.7, 5.2$  Hz), -161.62 (dd,  $J = 28.6, 15.3$  Hz). HRMS calcd. for  $\text{C}_{15}\text{H}_{15}\text{F}_5\text{N}_3$   $[\text{M}+\text{H}]^+$ : 332.1181. Found: 332.1142.

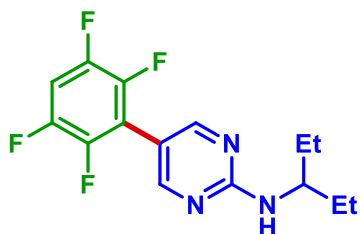

**3ab**

**N-(pentan-3-yl)-5-(2,3,5,6-tetrafluorophenyl)pyrimidin-2-amine (3ab):** Yield: 81% (0.081 mmol, 25.5 mg).  $^1\text{H}$  NMR (400 MHz,  $\text{CDCl}_3$ )  $\delta$  8.38 (s, 2H), 7.03 (tt,  $J = 9.6, 7.4$  Hz, 1H), 5.61 (s, 1H), 3.96 (dq,  $J = 8.9, 7.3, 5.6$  Hz, 1H), 1.72 – 1.61 (m, 2H), 1.57 – 1.46 (m, 2H), 0.95 (t,  $J = 7.4$  Hz, 6H).  $^{13}\text{C}$  NMR (126 MHz,  $\text{CDCl}_3$ )  $\delta$  162.3, 158.7, 147.5 (ddd,  $J = 14.7, 10.9, 4.0$  Hz), 145.5 (ddd,  $J = 14.9, 10.7, 4.0$  Hz), 145.0 – 144.4 (m), 143.0 – 142.4 (m), 116.5 (t,  $J = 16.4$  Hz), 110.6, 104.9 (d,  $J = 22.7$  Hz), 104.6, 104.4 – 104.1 (m), 53.8, 27.2, 10.2.  $^{19}\text{F}$  NMR (471 MHz,  $\text{CDCl}_3$ )  $\delta$  -138.60 (dd,  $J = 22.7, 12.9$  Hz), -144.09 (dd,  $J = 22.8, 12.9$  Hz). HRMS calcd. for  $\text{C}_{15}\text{H}_{16}\text{F}_4\text{N}_3$   $[\text{M}+\text{H}]^+$ : 314.1275 Found: 314.1280.

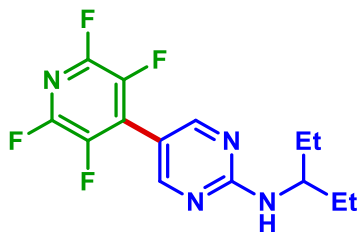

**3ac**

**N-(pentan-3-yl)-5-(perfluoropyridin-4-yl)pyrimidin-2-amine (3ac):** Yield: 72% (0.072 mmol, 22.5 mg).  $^1\text{H}$  NMR (500 MHz,  $\text{CDCl}_3$ )  $\delta$  8.50 (d,  $J = 37.5$  Hz, 2H), 5.56 (d,  $J = 8.7$  Hz, 1H), 4.04 – 3.94 (m, 1H), 1.73 – 1.63 (m, 2H), 1.53 (dp,  $J = 14.7, 7.4$  Hz, 2H), 0.96 (t,  $J = 7.4$  Hz, 6H).  $^{13}\text{C}$  NMR (126 MHz,  $\text{CDCl}_3$ )  $\delta$  162.4, 159.0, 158.5, 145.4 – 145.2 (m), 143.6 – 143.2 (m), 140.2 – 139.7 (m), 138.3 – 137.7

(m), 128.7 – 128.5 (m), 109.9 – 109.4 (m), 54.1, 27.3, 10.2.  $^{19}\text{F}$  NMR (471 MHz,  $\text{CDCl}_3$ )  $\delta$  -90.30 – -90.66 (m), -145.43 – -145.60 (m). HRMS calcd. for  $\text{C}_{14}\text{H}_{15}\text{F}_4\text{N}_4$   $[\text{M}+\text{H}]^+$ : 315.1227 Found: 315.1227.

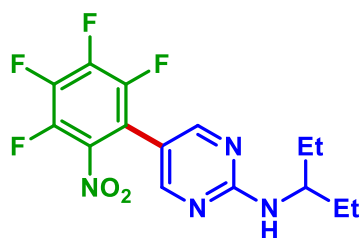

**3ad**

**N-(pentan-3-yl)-5-(2,3,4,5-tetrafluoro-6-nitrophenyl)pyrimidin-2-amine (3ad):** Yield: 58% (0.058 mmol, 21 mg).  $^1\text{H}$  NMR (400 MHz,  $\text{CDCl}_3$ )  $\delta$  8.20 (s, 2H), 5.36 (d,  $J$  = 8.8 Hz, 1H), 3.93 (dq,  $J$  = 8.7, 7.1, 5.7 Hz, 1H), 1.65 (ddd,  $J$  = 9.1, 7.5, 3.8 Hz, 2H), 1.53 (td,  $J$  = 14.4, 7.3 Hz, 2H), 0.95 (t,  $J$  = 7.4 Hz, 6H).  $^{13}\text{C}$  NMR (126 MHz,  $\text{CDCl}_3$ )  $\delta$  162.6, 157.9, 146.2 – 145.9 (m), 144.2 – 143.3 (m), 142.5 – 142.1 (m), 142.0 – 141.0 (m), 140.2 (ddd,  $J$  = 8.1, 4.7, 2.8 Hz), 139.5 – 138.9 (m), 116.1 (dd,  $J$  = 18.5, 4.2 Hz), 109.5 (s), 54.0, 27.1, 10.2.  $^{19}\text{F}$  NMR (376 MHz,  $\text{CDCl}_3$ )  $\delta$  -136.82 (ddd,  $J$  = 23.2, 11.0, 4.1 Hz), -146.34 (ddd,  $J$  = 21.9, 10.8, 5.6 Hz), -148.58 (ddd,  $J$  = 22.9, 20.5, 5.7 Hz), -151.27 (td,  $J$  = 20.9, 4.0 Hz). HRMS calcd. for  $\text{C}_{15}\text{H}_{15}\text{F}_4\text{N}_4\text{O}_2$   $[\text{M}+\text{H}]^+$ : 359.1126 Found: 359.1139.

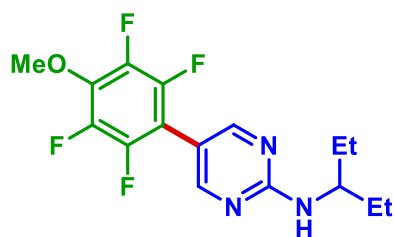

**3ae**

**N-(pentan-3-yl)-5-(2,3,5,6-tetrafluoro-4-methoxyphenyl)pyrimidin-2-amine (3ae):** Yield: 80% (0.08 mmol, 27.5 mg).  $^1\text{H}$  NMR (500 MHz,  $\text{CDCl}_3$ )  $\delta$  8.34 (s, 2H), 5.49 (d,  $J$  = 8.9 Hz, 1H), 4.10 (s, 3H), 3.99 – 3.91 (m, 1H), 1.70 – 1.61 (m, 2H), 1.56 – 1.47 (m, 2H), 0.95 (t,  $J$  = 7.4 Hz, 6H).  $^{13}\text{C}$  NMR (126 MHz,  $\text{CDCl}_3$ )  $\delta$  162.1, 158.6, 145.6 – 145.2 (m), 143.6 – 143.2 (m), 142.4 (dt,  $J$  = 15.8, 4.2 Hz), 140.4 (dt,  $J$  = 15.8, 4.4 Hz), 137.7 – 137.5 (m), 110.4, 109.1 (t,  $J$  = 17.1 Hz), 62.3, 53.8, 27.2, 10.2.  $^{19}\text{F}$  NMR (471 MHz,  $\text{CDCl}_3$ )  $\delta$  -145.30 (d,  $J$  = 21.2 Hz), -157.67 (d,  $J$  = 20.6 Hz). HRMS calcd. for  $\text{C}_{16}\text{H}_{18}\text{F}_4\text{N}_3\text{O}$   $[\text{M}+\text{H}]^+$ : 344.1381 Found: 344.1379.

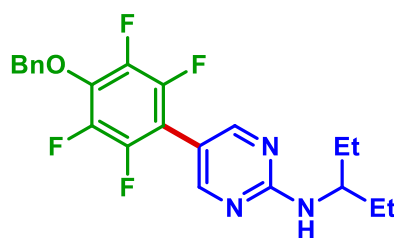

**3af**

**5-(4-(benzyloxy)-2,3,5,6-tetrafluorophenyl)-N-(pentan-3-yl)pyrimidin-2-amine (3af):** Yield: 57% (0.057 mmol, 24 mg).  $^1\text{H}$  NMR (400 MHz,  $\text{CDCl}_3$ )  $\delta$  8.34 (s, 2H), 7.46 (dd,  $J$  = 7.7, 1.4 Hz, 2H), 7.42

– 7.33 (m, 3H), 5.29 (s, 2H), 5.26 (d,  $J = 9.1$  Hz, 1H), 3.95 (dq,  $J = 8.9, 7.2, 5.6$  Hz, 1H), 1.72 – 1.60 (m, 2H), 1.58 – 1.46 (m, 2H), 0.95 (t,  $J = 7.5$  Hz, 6H).  $^{13}\text{C}$  NMR (126 MHz,  $\text{CDCl}_3$ )  $\delta$  162.1, 158.6, 145.4 – 145.2 (m), 143.7 – 143.1 (m), 142.9 (dt,  $J = 15.7, 4.3$  Hz), 140.9 (dt,  $J = 15.7, 4.4$  Hz), 136.4 – 135.9 (m), 110.5, 109.6 (t,  $J = 17.1$  Hz), 76.6 (t,  $J = 3.5$  Hz), 53.8, 27.2, 10.2.  $^{19}\text{F}$  NMR (376 MHz,  $\text{CDCl}_3$ )  $\delta$  -145.10 (dd,  $J = 23.4, 9.7$  Hz), -155.72 (dd,  $J = 23.0, 9.3$  Hz). HRMS calcd. for  $\text{C}_{22}\text{H}_{22}\text{F}_4\text{N}_3\text{O}$   $[\text{M}+\text{H}]^+$ : 420.1694 Found: 420.1684.

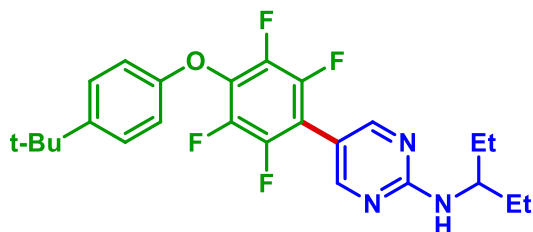

**3ag**

**5-(4-(4-(tert-butyl)phenoxy)-2,3,5,6-tetrafluorophenyl)-N-(pentan-3-yl)pyrimidin-2-amine (3ag):**

Yield: 76% (0.076 mmol, 35 mg).  $^1\text{H}$  NMR (400 MHz,  $\text{CDCl}_3$ )  $\delta$  8.40 (br s, 2H), 7.37 – 7.33 (m, 2H), 6.97 – 6.92 (m, 2H), 5.38 (br s, 1H), 4.03 – 3.92 (m, 1H), 1.73 – 1.63 (m, 2H), 1.55 (td,  $J = 14.4, 7.3$  Hz, 2H), 1.31 (s, 9H), 0.97 (t,  $J = 7.5$  Hz, 6H).  $^{13}\text{C}$  NMR (126 MHz,  $\text{CDCl}_3$ )  $\delta$  162.1, 158.7, 155.2, 146.9, 145.6 – 145.3 (m), 143.7 – 143.0 (m), 141.2 (dt,  $J = 16.0, 3.9$  Hz), 133.1 (tt,  $J = 14.5, 4.0$  Hz), 126.8, 115.2, 111.6 (t,  $J = 17.0$  Hz), 110.2, 53.8, 34.5, 31.57, 27.2, 10.2.  $^{19}\text{F}$  NMR (376 MHz,  $\text{CDCl}_3$ )  $\delta$  -144.09 (dd,  $J = 23.5, 10.0$  Hz), -153.81 (dd,  $J = 23.1, 9.8$  Hz). HRMS calcd. for  $\text{C}_{25}\text{H}_{28}\text{F}_4\text{N}_3\text{O}$   $[\text{M}+\text{H}]^+$ : 462.2163 Found: 462.2161.

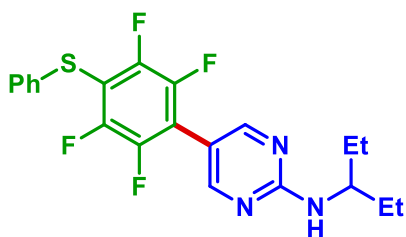

**3ah**

**N-(pentan-3-yl)-5-(2,3,5,6-tetrafluoro-4-(phenylthio)phenyl)pyrimidin-2-amine (3ah):**

Yield: 56% (0.056 mmol, 23.5 mg).  $^1\text{H}$  NMR (400 MHz,  $\text{CDCl}_3$ )  $\delta$  8.41 (br s, 2H), 7.45 – 7.37 (m, 2H), 7.35 – 7.26 (m, 3H), 5.53 (d,  $J = 8.6$  Hz, 1H), 4.02 – 3.93 (m), 1.72 – 1.62 (m, 2H), 1.59 – 1.47 (m, 2H), 0.96 (t,  $J = 7.4$  Hz, 6H).  $^{13}\text{C}$  NMR (126 MHz,  $\text{CDCl}_3$ )  $\delta$  162.0, 158.6, 148.5 (dt,  $J = 14.6, 3.3$  Hz), 146.6 (dt,  $J = 14.6, 3.6$  Hz), 145.2 – 144.6 (m), 143.3 – 142.8 (m), 133.2, 130.8, 129.5, 128.0, 116.7 (t,  $J = 16.5$  Hz), 112.9, 112.8, 112.6, 110.4, 53.9, 27.2, 10.2.  $^{19}\text{F}$  NMR (471 MHz,  $\text{CDCl}_3$ )  $\delta$  -108.59 (t,  $J = 5.6$  Hz), -111.54 (d,  $J = 5.8$  Hz). HRMS calcd. for  $\text{C}_{21}\text{H}_{20}\text{F}_4\text{N}_3\text{S}$   $[\text{M}+\text{H}]^+$ : 422.1309 Found: 422.1302.

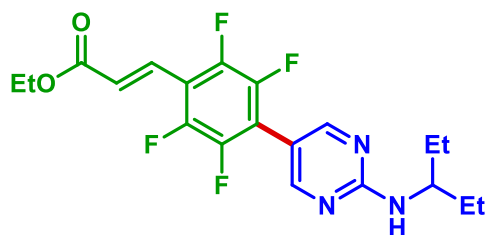

**3ai**

**ethyl (E)-3-(2,3,5,6-tetrafluoro-4-(2-(pentan-3-ylamino)pyrimidin-5-yl)phenyl)acrylate (3ai):** Yield: 65% (0.065 mmol, 27 mg).  $^1\text{H NMR}$  (400 MHz,  $\text{CDCl}_3$ )  $\delta$  8.45 (s, 2H), 7.72 (d,  $J = 16.5$  Hz, 1H), 6.79 (d,  $J = 16.4$  Hz, 1H), 5.45 (d,  $J = 8.4$  Hz, 1H), 4.30 (q,  $J = 7.1$  Hz, 2H), 4.02 – 3.92 (m, 1H), 1.71 – 1.62 (m, 2H), 1.58 – 1.48 (m, 2H), 1.35 (t,  $J = 7.2$  Hz, 3H), 0.95 (t,  $J = 7.5$  Hz, 6H).  $^{13}\text{C NMR}$  (126 MHz,  $\text{CDCl}_3$ )  $\delta$  166.3, 162.1, 159.0 – 158.4 (m), 146.8 (ddd,  $J = 14.6, 6.6, 3.3$  Hz), 145.2 – 144.6 (m), 143.1 – 142.6 (m), 129.1, 126.5 (t,  $J = 8.6$  Hz), 116.7 (t,  $J = 16.4$  Hz), 113.2 (t,  $J = 13.4$  Hz), 110.5 (d,  $J = 4.0$  Hz), 61.2, 53.9, 27.2, 14.4, 10.2.  $^{19}\text{F NMR}$  (376 MHz,  $\text{CDCl}_3$ )  $\delta$  -140.01 (td,  $J = 14.0, 2.8$  Hz), -144.27 (dd,  $J = 22.9, 13.4$  Hz). **HRMS** calcd. for  $\text{C}_{20}\text{H}_{22}\text{F}_4\text{N}_3\text{O}_2$   $[\text{M}+\text{H}]^+$ : 412.1643 Found: 412.1631.

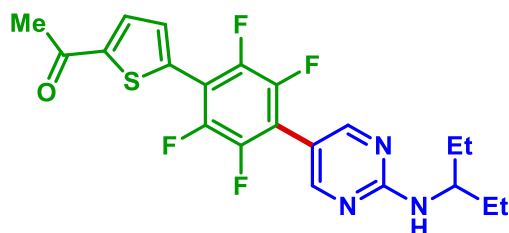

**3aj**

**1-(5-(2,3,5,6-tetrafluoro-4-(2-(pentan-3-ylamino)pyrimidin-5-yl)phenyl)thiophen-2-yl)ethan-1-one (3aj):** Yield: 64% (0.064 mmol, 28 mg).  $^1\text{H NMR}$  (400 MHz,  $\text{CDCl}_3$ )  $\delta$  8.43 (s, 2H), 7.73 (d,  $J = 3.8$  Hz, 1H), 7.61 (d,  $J = 4.1$  Hz, 1H), 5.57 (d,  $J = 9.0$  Hz, 1H), 3.97 (dtd,  $J = 9.0, 7.3, 1.7$  Hz, 1H), 2.60 (s, 3H), 1.73 – 1.61 (m, 2H), 1.52 (dt,  $J = 21.4, 7.4$  Hz, 2H), 0.95 (t,  $J = 7.4$  Hz, 6H).  $^{13}\text{C NMR}$  (126 MHz,  $\text{CDCl}_3$ )  $\delta$  190.7, 162.2, 158.7, 145.8 (t,  $J = 3.5$  Hz), 145.6 – 145.1 (m), 143.4 – 143.2 (m), 135.9 – 135.3 (m), 132.1, 131.0 (t,  $J = 6.1$  Hz), 115.4 (t,  $J = 16.6$  Hz), 112.2 (t,  $J = 14.7$  Hz), 110.3, 53.8, 27.2, 27.0, 10.2.  $^{19}\text{F NMR}$  (376 MHz,  $\text{CDCl}_3$ )  $\delta$  -138.99 (td,  $J = 13.6, 3.1$  Hz), -143.08 – -144.43 (m). **HRMS** calcd. for  $\text{C}_{21}\text{H}_{19}\text{F}_4\text{N}_3\text{OS}$   $[\text{M}+\text{H}]^+$ : 438.1258 Found: 438.1260.

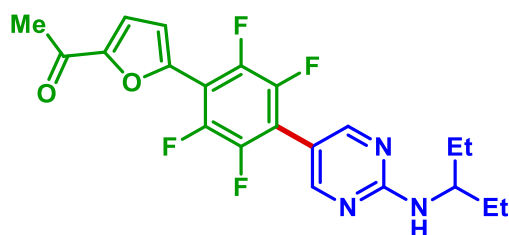

**3ak**

**1-(5-(2,3,5,6-tetrafluoro-4-(2-(pentan-3-ylamino)pyrimidin-5-yl)phenyl)furan-2-yl)ethan-1-one (3ak):** Yield: 44% (0.044 mmol, 18.5 mg).  $^1\text{H NMR}$  (400 MHz,  $\text{CDCl}_3$ )  $\delta$  8.45 (s, 2H), 7.32 (d,  $J = 3.7$

Hz, 1H), 7.06 (dt,  $J = 3.6, 1.7$  Hz, 1H), 5.37 (d,  $J = 9.1$  Hz, 1H), 3.98 (ddq,  $J = 11.1, 7.3, 5.6$  Hz, 1H), 2.57 (s, 3H), 1.73 – 1.63 (m, 2H), 1.59 – 1.48 (m, 2H), 0.96 (t,  $J = 7.4$  Hz, 6H).  $^{13}\text{C}$  NMR (126 MHz,  $\text{CDCl}_3$ )  $\delta$  187.2, 162.0, 159.3 – 157.9 (m), 153.3, 145.8 – 144.7 (m), 143.5 – 142.9 (m), 117.5, 115.9 (t,  $J = 6.5$  Hz), 110.3, 108.7 (t,  $J = 13.7$  Hz), 54.0, 27.2, 26.3, 10.2.  $^{19}\text{F}$  NMR (376 MHz,  $\text{CDCl}_3$ )  $\delta$  -140.04 (ddd,  $J = 23.6, 13.4, 2.4$  Hz), -143.57 – -143.91 (m). HRMS calcd. for  $\text{C}_{21}\text{H}_{20}\text{F}_4\text{N}_3\text{O}_2$   $[\text{M}+\text{H}]^+$ : 422.1486 Found: 422.1445.

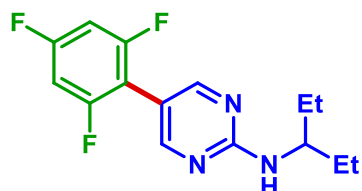

**3al**

**N-(pentan-3-yl)-5-(2,4,6-trifluorophenyl)pyrimidin-2-amine (3al):** Yield: 68% (0.068 mmol, 20 mg).  $^1\text{H}$  NMR (500 MHz,  $\text{CDCl}_3$ )  $\delta$  8.33 (s, 2H), 6.83 – 6.65 (m, 2H), 5.38 (d,  $J = 8.8$  Hz, 1H), 3.94 (dq,  $J = 14.3, 7.2, 5.7$  Hz, 1H), 1.71 – 1.59 (m, 2H), 1.50 (dt,  $J = 21.4, 7.4$  Hz, 2H), 0.94 (t,  $J = 7.4$  Hz, 6H).  $^{13}\text{C}$  NMR (126 MHz,  $\text{CDCl}_3$ )  $\delta$  162.8 (t,  $J = 15.6$  Hz), 162.0, 161.4 (dd,  $J = 14.7, 9.8$  Hz), 160.9 (t,  $J = 15.7$  Hz), 159.4 (dd,  $J = 14.8, 9.8$  Hz), 158.7, 111.2, 109.8 (td,  $J = 19.2, 4.8$  Hz), 101.3 – 100.4 (m), 53.7, 27.2, 10.2.  $^{19}\text{F}$  NMR (471 MHz,  $\text{CDCl}_3$ )  $\delta$  -108.59 (t,  $J = 5.6$  Hz), -111.54 (d,  $J = 5.8$  Hz). HRMS calcd. for  $\text{C}_{15}\text{H}_{17}\text{F}_3\text{N}_3$   $[\text{M}+2\text{H}]^+$ : 296.1369 Found: 296.1369.

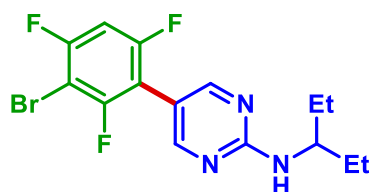

**3am**

**5-(3-bromo-2,4,6-trifluorophenyl)-N-(pentan-3-yl)pyrimidin-2-amine (3am):** Yield: 70% (0.07 mmol, 26 mg).  $^1\text{H}$  NMR (500 MHz,  $\text{CDCl}_3$ )  $\delta$  8.32 (s, 2H), 6.95 – 6.82 (m, 1H), 5.26 (d,  $J = 8.8$  Hz, 1H), 4.00 – 3.91 (m, 1H), 1.70 – 1.62 (m, 2H), 1.53 (td,  $J = 14.4, 7.3$  Hz, 2H), 0.95 (t,  $J = 7.4$  Hz, 6H).  $^{13}\text{C}$  NMR (126 MHz,  $\text{CDCl}_3$ )  $\delta$  162.1, 160.3 – 159.9 (m), 159.9 – 159.5 (m), 158.7, 158.5 – 158.0 (m), 157.8 (dd,  $J = 15.2, 6.5$  Hz), 156.4 (dd,  $J = 9.4, 6.2$  Hz), 111.4 – 110.6 (m), 101.4 (td,  $J = 27.5, 3.7$  Hz), 94.7 – 94.3 (m), 53.8, 27.2, 10.2.  $^{19}\text{F}$  NMR (471 MHz,  $\text{CDCl}_3$ )  $\delta$  -103.46 (s), -105.12 (s), -112.66 (s). HRMS calcd. for  $\text{C}_{15}\text{H}_{16}^{79}\text{BrF}_3\text{N}_3$   $[\text{M}+\text{H}]^+$ : 374.0480; Found: 374.0478.  $\text{C}_{15}\text{H}_{16}^{81}\text{BrF}_3\text{N}_3$   $[\text{M}+\text{H}]^+$ : 376.0461; Found: 374.0459.



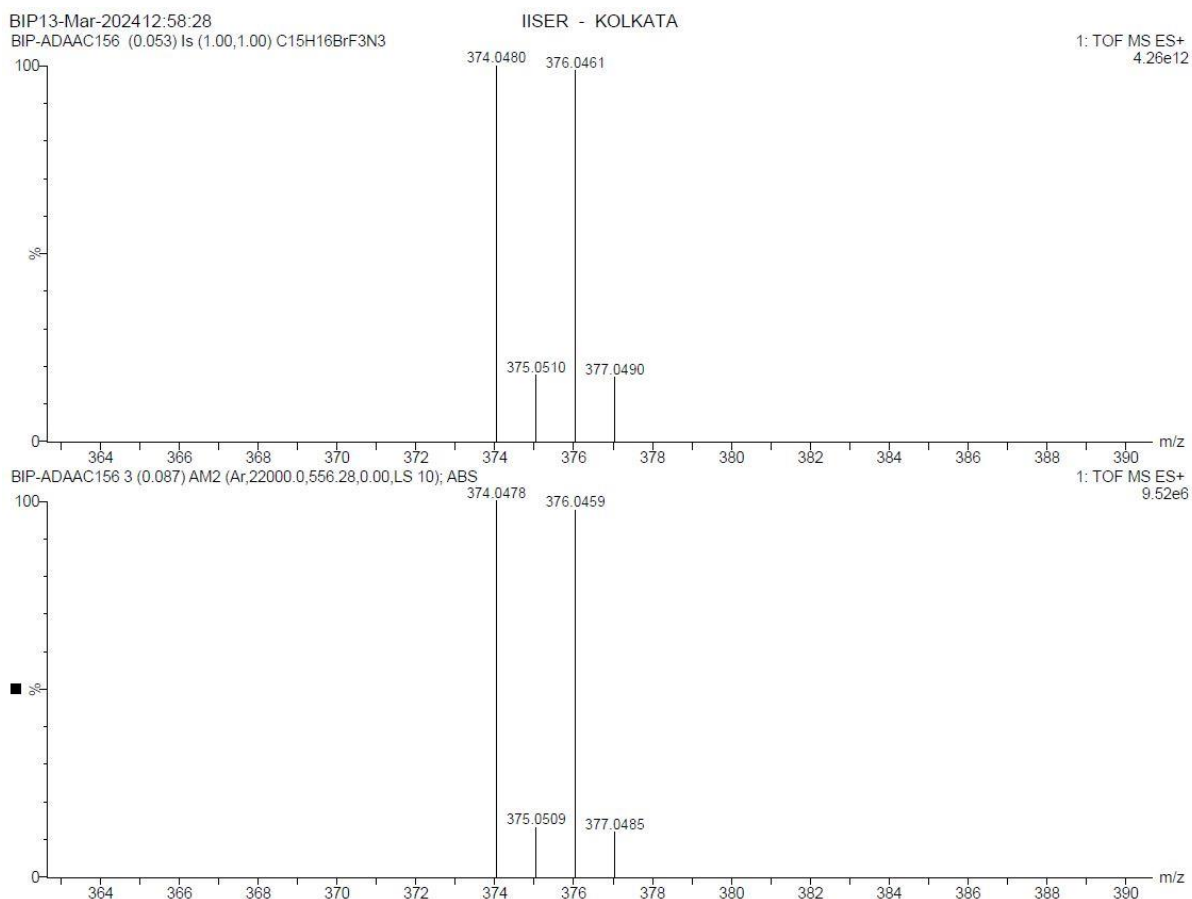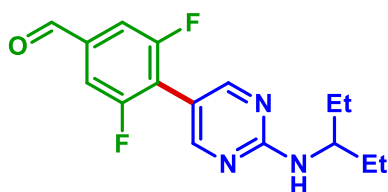

**3an**

**3,5-difluoro-4-(2-(pentan-3-ylamino)pyrimidin-5-yl)benzaldehyde (3an):** Yield: 36% (0.036 mmol, 11 mg). <sup>1</sup>H NMR (400 MHz, CDCl<sub>3</sub>) δ 9.94 (t, *J* = 1.7 Hz, 1H), 8.45 (s, 2H), 7.58 – 7.45 (m, 2H), 5.32 (d, *J* = 8.9 Hz, 1H), 4.02 – 3.39 (m, 1H), 1.73 – 1.62 (m, 2H), 1.54 (td, *J* = 14.4, 7.3 Hz, 2H), 0.96 (t, *J* = 7.4 Hz, 6H). <sup>13</sup>C NMR (126 MHz, CDCl<sub>3</sub>) δ 189.1, 161.9, 161.4 (d, *J* = 7.2 Hz), 159.4 (d, *J* = 6.9 Hz), 159.2 – 158.4 (m), 136.7 (t, *J* = 7.8 Hz), 119.5 (t, *J* = 18.6 Hz), 112.8 (dd, *J* = 20.6, 7.0 Hz), 111.1 (s), 53.9, 27.3, 10.2. <sup>19</sup>F NMR (376 MHz, CDCl<sub>3</sub>) δ -111.80 (dq, *J* = 7.9, 1.6 Hz). HRMS calcd. for C<sub>16</sub>H<sub>17</sub>F<sub>2</sub>N<sub>3</sub>O [M+H]<sup>+</sup>: 306.1412 Found: 306.1418.

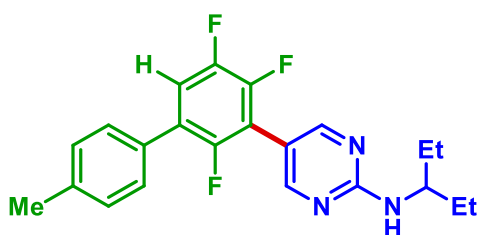

**3ao**

**N-(pentan-3-yl)-5-(2,4,5-trifluoro-4'-methyl-[1,1'-biphenyl]-3-yl)pyrimidin-2-amine (3ao):** Yield: 47% (0.047 mmol, 18 mg). <sup>1</sup>H NMR (400 MHz, CDCl<sub>3</sub>) δ 8.43 (s, 2H), 7.43 – 7.36 (m, 2H), 7.31 – 7.18 (m, 3H), 5.66 (s, 1H), 4.05 – 3.93 (m, 1H), 2.41 (s, 3H), 1.74 – 1.62 (m, 2H), 1.61– 1.50 (m, 2H), 0.97 (t, *J* = 7.4 Hz, 6H). <sup>13</sup>C NMR (101 MHz, CDCl<sub>3</sub>) δ 161.1, 153.2 (dd, *J* = 4.1, 2.5 Hz), 150.8 (dd, *J* = 4.0, 2.6 Hz), 148.7 – 148.5 (m), 148.1 – 147.8 (m), 146.2 (dd, *J* = 13.3, 3.5 Hz), 145.5 (dd, *J* = 14.6, 6.8 Hz), 138.5, 131.2, 129.6, 128.9 (d, *J* = 3.0 Hz), 125.9 (ddd, *J* = 17.2, 6.2, 4.4 Hz), 116.8 (dd, *J* = 19.2, 4.7 Hz), 114.9 (dd, *J* = 21.7, 14.9 Hz), 111.6, 54.0, 27.2, 21.4, 10.2. <sup>19</sup>F NMR (376 MHz, CDCl<sub>3</sub>) δ -123.77 – -123.92 (m), -139.57 (dt, *J* = 7.6, 2.9 Hz), -141.23 – -141.34 (m). **HRMS** calcd. for C<sub>22</sub>H<sub>23</sub>F<sub>3</sub>N<sub>3</sub> [M+H]<sup>+</sup>: 386.1839 Found: 386.1828.

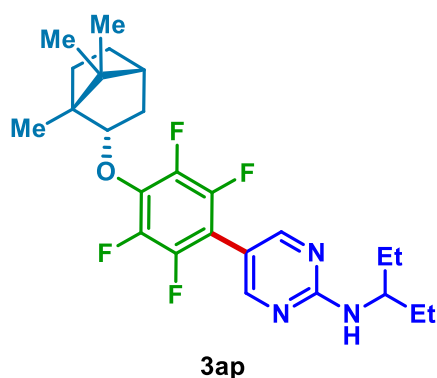

**N-(pentan-3-yl)-5-(2,3,5,6-tetrafluoro-4-(((1S,2S,4R)-1,7,7-trimethylbicyclo[2.2.1]heptan-2-yl)oxy)phenyl)pyrimidin-2-amine (3ap):** Yield: 64% (0.064 mmol, 30 mg). <sup>1</sup>H NMR (400 MHz, CDCl<sub>3</sub>) δ 8.35 (s, 2H), 5.38 (d, *J* = 9.0 Hz, 1H), 4.59 – 4.47 (m, 1H), 3.95 (ddt, *J* = 14.5, 9.0, 3.6 Hz, 1H), 2.36 – 2.20 (m, 2H), 1.88 – 1.43 (m, 6H), 1.43 – 1.28 (m, 3H), 0.99 – 0.85 (m, 14H). <sup>13</sup>C NMR (126 MHz, CDCl<sub>3</sub>) δ 162.0, 158.6, 145.6 – 145.2 (m), 143.7 – 143.1 (m), 142.7 (dt, *J* = 15.4, 4.2 Hz), 140.8 (dt, *J* = 15.5, 4.3 Hz), 137.5 (tt, *J* = 11.6, 2.9 Hz), 110.6, 108.6 (t, *J* = 17.1 Hz), 91.6 (t, *J* = 2.1 Hz), 53.8, 50.4, 48.3, 45.1, 36.5, 28.2, 27.2, 26.3, 19.9, 19.0, 13.6, 10.2. <sup>19</sup>F NMR (471 MHz, CDCl<sub>3</sub>) δ -145.68 (dd, *J* = 23.7, 11.6 Hz), -156.32 (dd, *J* = 23.3, 11.6 Hz). **HRMS** calcd. for C<sub>25</sub>H<sub>32</sub>F<sub>4</sub>N<sub>3</sub>O [M+H]<sup>+</sup>: 466.2476 Found: 466.2490.

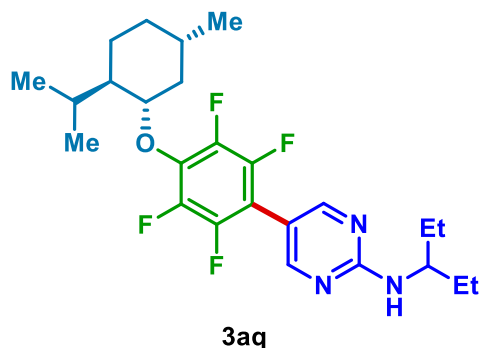

**N-(pentan-3-yl)-5-(2,3,5,6-tetrafluoro-4-(((1R,2S,5R)-2-isopropyl-5-methylcyclohexyl)oxy)phenyl)pyrimidin-2-amine (3aq):** Yield: 75% (0.075 mmol, 35 mg). <sup>1</sup>H NMR (400 MHz, CDCl<sub>3</sub>) δ 8.36 (s, 2H), 5.33 (d, *J* = 9.0 Hz, 1H), 4.17 (td, *J* = 10.6, 4.3 Hz, 1H), 4.03 – 3.90

(m, 1H), 2.40 (dtd,  $J = 13.6, 6.8, 2.3$  Hz, 1H), 1.95 (d,  $J = 12.2$  Hz, 1H), 1.76 – 1.61 (m, 4H), 1.53 (dt,  $J = 21.2, 7.2$  Hz, 3H), 1.45 – 1.34 (m, 1H), 1.12 (ddd,  $J = 20.8, 18.2, 10.8$  Hz, 2H), 1.01 – 0.85 (m, 17H).  $^{13}\text{C}$  NMR (126 MHz,  $\text{CDCl}_3$ )  $\delta$  161.8, 158.7, 145.3 (dd,  $J = 14.3, 9.5$  Hz), 143.5 – 143.0 (m), 141.3 (dt,  $J = 22.5, 7.6$  Hz), 136.0 – 135.6 (m), 110.7, 108.9, 84.5, 53.8, 48.6, 40.7, 34.3, 31.6, 27.2, 25.9 (d,  $J = 9.5$  Hz), 23.3, 22.2, 21.1, 16.2, 10.2.  $^{19}\text{F}$  NMR (376 MHz,  $\text{CDCl}_3$ )  $\delta$  -145.56 (dd,  $J = 23.2, 9.4$  Hz), -155.31 (dd,  $J = 23.3, 9.5$  Hz). HRMS calcd. for  $\text{C}_{25}\text{H}_{33}\text{F}_4\text{N}_3\text{O}$   $[\text{M}+\text{H}]^+$ : 467.2560 Found: 467.2558.

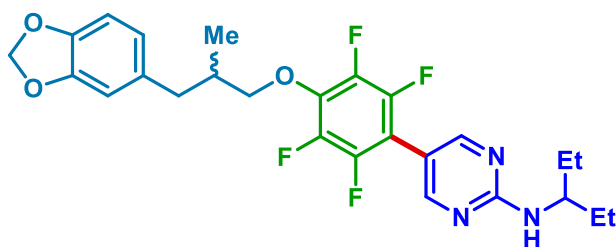

**3ar**

**5-(4-(3-(benzo[d][1,3]dioxol-5-yl)-2-methylpropoxy)-2,3,5,6-tetrafluorophenyl)-N-(pentan-3-yl)pyrimidin-2-amine (3ar):** Yield: 52 % (0.052 mmol, 26 mg).  $^1\text{H}$  NMR (400 MHz,  $\text{CDCl}_3$ )  $\delta$  8.35 (br s, 2H), 6.74 (d,  $J = 7.9$  Hz, 1H), 6.69 (d,  $J = 1.4$  Hz, 1H), 6.64 (dd,  $J = 7.9, 1.6$  Hz, 1H), 5.93 (s, 2H), 5.32 (d,  $J = 9.1$  Hz, 1H), 4.12 – 4.02 (m, 2H), 4.00 – 3.91 (m, 1H), 2.83 (dd,  $J = 13.6, 6.4$  Hz, 1H), 2.48 (dd,  $J = 13.6, 7.8$  Hz, 1H), 2.17 (dq,  $J = 13.2, 6.4$  Hz, 1H), 1.72 – 1.61 (m, 2H), 1.58 – 1.47 (m, 2H), 1.04 (d,  $J = 6.8$  Hz, 3H), 0.96 (t,  $J = 7.5$  Hz, 6H).  $^{13}\text{C}$  NMR (126 MHz,  $\text{CDCl}_3$ )  $\delta$  162.0, 158.7, 147.7, 146.0, 145.6 – 145.1 (m), 143.6 – 143.3 (m), 142.9 – 142.4 (m), 140.7 (dt,  $J = 8.4, 4.7$  Hz), 137.4 – 137.0 (m), 133.8, 122.2, 110.6, 109.6, 109.1 (t,  $J = 17.2$  Hz), 108.3, 101.0, 79.3, 53.8, 39.0, 36.3, 27.2, 16.5, 10.2.  $^{19}\text{F}$  NMR (376 MHz,  $\text{CDCl}_3$ )  $\delta$  -145.18 – 145.26 (m), -156.63 (dd,  $J = 22.9, 9.3$  Hz). HRMS calcd. for  $\text{C}_{26}\text{H}_{28}\text{F}_4\text{N}_3\text{O}_3$   $[\text{M}+\text{H}]^+$ : 506.2061 Found: 506.2056.

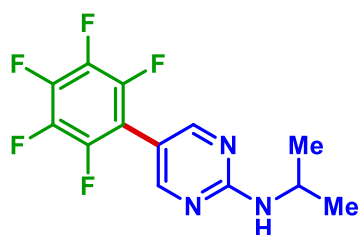

**3ba**

**N-isopropyl-5-(perfluorophenyl)pyrimidin-2-amine (3ba):** Yield: 76% (0.076 mmol, 23 mg).  $^1\text{H}$  NMR (500 MHz,  $\text{CDCl}_3$ )  $\delta$  8.35 (s, 2H), 5.90 (s, 1H), 4.24 – 4.16 (m, 1H), 1.27 (d,  $J = 6.5$  Hz, 6H).  $^{13}\text{C}$  NMR (126 MHz,  $\text{CDCl}_3$ )  $\delta$  160.9, 158.6, 145.4 – 144.8 (m), 143.4 – 143.2 (m), 141.8 – 141.1 (m), 139.7 – 138.9 (m), 137.4 – 136.9 (m), 110.8 (td,  $J = 16.9, 3.7$  Hz), 109.5, 43.3, 22.8.  $^{19}\text{F}$  NMR (471 MHz,  $\text{CDCl}_3$ )  $\delta$  -143.40 (dd,  $J = 22.9, 8.2$  Hz), -154.93 (t,  $J = 20.9$  Hz), -161.46 (td,  $J = 22.6, 8.2$  Hz). HRMS calcd. for  $\text{C}_{13}\text{H}_{11}\text{F}_5\text{N}_3$   $[\text{M}+\text{H}]^+$ : 304.0868. Found: 304.0882.

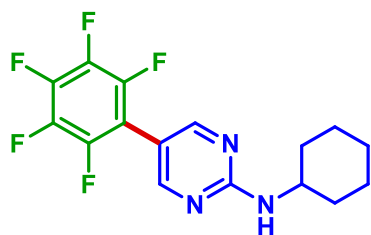

**3ca**

**N-cyclohexyl-5-(perfluorophenyl)pyrimidin-2-amine (3ca):** Yield: 72% (0.072 mmol, 25 mg).  $^1\text{H NMR}$  (400 MHz,  $\text{CDCl}_3$ )  $\delta$  8.34 (s, 2H), 5.63 (d,  $J = 8.0$  Hz, 1H), 3.86 (tdd,  $J = 10.6, 7.4, 4.0$  Hz, 1H), 2.11 – 2.01 (m, 2H), 1.82 – 1.71 (m, 2H), 1.69 – 1.60 (m, 1H), 1.48 – 1.36 (m, 2H), 1.29 – 1.19 (m, 3H).  $^{13}\text{C NMR}$  (126 MHz,  $\text{CDCl}_3$ )  $\delta$  161.4, 158.7, 145.5 – 145.0 (m), 143.4 – 143.2 (m), 141.6 – 141.3 (m), 139.8 – 138.8 (m), 137.3 – 136.9 (m), 111.0 (td,  $J = 17.1, 3.9$  Hz), 109.6, 50.0, 33.2, 25.8, 25.0.  $^{19}\text{F NMR}$  (471 MHz,  $\text{CDCl}_3$ )  $\delta$  -143.37 (d,  $J = 20.5$  Hz), -155.03 (t,  $J = 18.1$  Hz), -161.50 (t,  $J = 20.9$  Hz). **HRMS** calcd. for  $\text{C}_{16}\text{H}_{15}\text{F}_5\text{N}_3$   $[\text{M}+\text{H}]^+$ : 344.1181. Found: 344.1183.

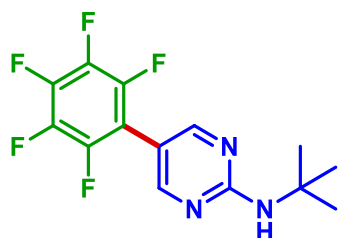

**3da**

**N-(tert-butyl)-5-(perfluorophenyl)pyrimidin-2-amine (3da):** Yield: 82% (0.082 mmol, 26 mg).  $^1\text{H NMR}$  (400 MHz,  $\text{CDCl}_3$ )  $\delta$  8.33 (s, 2H), 5.53 (s, 1H), 1.47 (s, 9H).  $^{13}\text{C NMR}$  (126 MHz,  $\text{CDCl}_3$ )  $\delta$  161.8, 158.2, 145.4 – 145.0 (m), 143.4 – 143.2 (m), 141.7 – 141.1 (m), 139.6 – 138.9 (m), 137.4 – 136.8 (m), 111.1 (td,  $J = 16.9, 4.0$  Hz), 109.6, 51.5, 28.9.  $^{19}\text{F NMR}$  (471 MHz,  $\text{CDCl}_3$ )  $\delta$  -143.40 (d,  $J = 19.4$  Hz), -155.20 (t,  $J = 21.9$  Hz), -161.60 (t,  $J = 27.0$  Hz). **HRMS** calcd. for  $\text{C}_{14}\text{H}_{13}\text{F}_5\text{N}_3$   $[\text{M}+\text{H}]^+$ : 318.1024. Found: 318.1024.

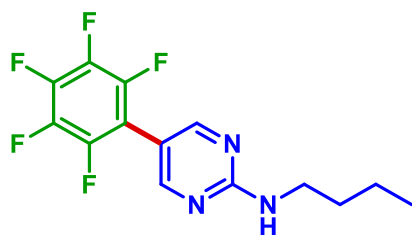

**3ea**

**N-butyl-5-(perfluorophenyl)pyrimidin-2-amine (3ea):** Yield: 79% (0.079 mmol, 25 mg).  $^1\text{H NMR}$  (500 MHz,  $\text{CDCl}_3$ )  $\delta$  8.35 (s, 2H), 5.58 (d,  $J = 9.3$  Hz, 1H), 3.47 (dd,  $J = 13.2, 6.8$  Hz, 2H), 1.63 (dt,  $J = 14.8, 7.3$  Hz, 2H), 1.43 (dq,  $J = 14.7, 7.4$  Hz, 2H), 0.96 (t,  $J = 7.3$  Hz, 3H).  $^{13}\text{C NMR}$  (126 MHz,  $\text{CDCl}_3$ )  $\delta$  162.1, 158.7, 145.4 – 145.2 (m), 143.5 – 142.8 (m), 141.6 – 141.4 (m), 139.6 – 138.7 (m), 137.3 – 137.0 (m), 111.2 – 110.6 (m), 109.8, 41.5, 31.7, 20.2, 13.9.  $^{19}\text{F NMR}$  (471 MHz,  $\text{CDCl}_3$ )  $\delta$  -

143.22 – -143.44 (m), -155.09 (t,  $J = 20.6$  Hz), -161.55 (dd,  $J = 23.8, 16.8$  Hz). **HRMS** calcd. for  $C_{14}H_{13}F_5N_3$   $[M+H]^+$ : 318.1024. Found: 318.1022.

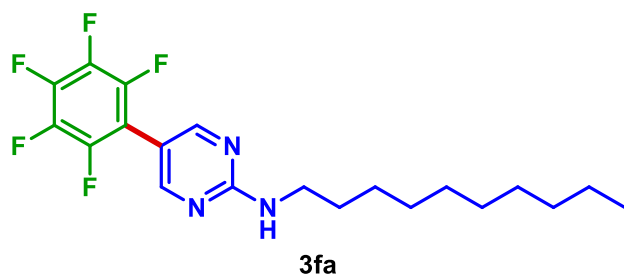

**N-decyl-5-(perfluorophenyl)pyrimidin-2-amine (3fa):** Yield: 71% (0.071 mmol, 28.5 mg).  **$^1H$  NMR** (500 MHz,  $CDCl_3$ )  $\delta$  8.35 (s, 2H), 5.73 (s, 1H), 3.45 (dd,  $J = 13.1, 7.0$  Hz, 2H), 1.68 – 1.59 (m, 2H), 1.25 (br s, 14H), 0.87 (t,  $J = 6.9$  Hz, 3H).  **$^{13}C$  NMR** (126 MHz,  $CDCl_3$ )  $\delta$  162.1, 158.7, 145.4 – 145.2 (m), 143.4 – 143.2 (m), 141.7 – 141.2 (m), 139.7 – 138.9 (m), 137.6 – 136.9 (m), 111.0 (td,  $J = 17.1, 3.9$  Hz), 109.7 (s), 41.8 (s), 32.0 (s), 29.9 – 29.6 (m), 29.5, 27.1, 22.8, 14.2.  **$^{19}F$  NMR** (471 MHz,  $CDCl_3$ )  $\delta$  -143.35 – -143.47 (m), -155.16 (t,  $J = 21.6$  Hz), -161.11 – -162.18 (m). **HRMS** calcd. for  $C_{20}H_{25}F_5N_3$   $[M+H]^+$ : 402.1963. Found: 402.1951.

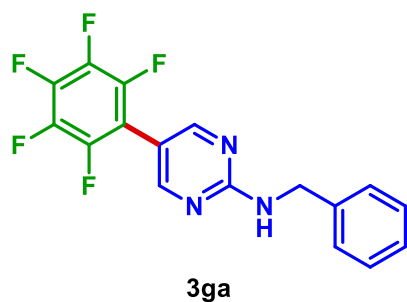

**N-benzyl-5-(perfluorophenyl)pyrimidin-2-amine (3ga):** Yield: 65% (0.065 mmol, 22.5 mg).  **$^1H$  NMR** (400 MHz,  $CDCl_3$ )  $\delta$  8.31 (s, 2H), 7.39 – 7.33 (m, 4H), 7.29 (d,  $J = 6.8$  Hz, 1H), 6.17 (s, 1H), 4.70 (d,  $J = 5.8$  Hz, 2H);  **$^{13}C$  NMR** (126 MHz,  $CDCl_3$ )  $\delta$  161.91, 158.7, 145.4 – 145.2 (m), 143.4 – 143.2 (m), 141.7 – 141.5 (m), 139.7 – 139.0 (m), 138.6, 137.3 – 137.0 (m), 128.9, 127.8, 127.6, 111.0 – 110.7 (m), 110.4, 45.8;  **$^{19}F$  NMR** (376 MHz,  $CDCl_3$ )  $\delta$  -143.1 (dd,  $J = 23.7, 8.8$  Hz), -154.6 – -154.7 (m), -161.2 – -161.4 (m); **HRMS** calcd. for  $C_{17}H_{11}F_5N_3$   $[M+H]^+$ : 352.0868. Found: 352.0873.

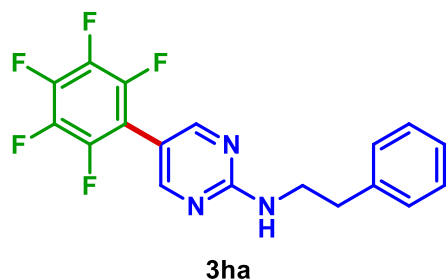

**5-(perfluorophenyl)-N-phenethylpyridin-2-amine (3ha):** Yield: 43% (0.043 mmol, 15.5 mg).  **$^1H$  NMR** (400 MHz,  $CDCl_3$ )  $\delta$  8.36 (s, 2H), 7.36 – 7.29 (m, 2H), 7.26 – 7.22 (m, 3H), 5.50 (s, 1H), 3.76 (dd,  $J = 13.2, 6.8$  Hz, 2H), 2.96 (t,  $J = 7.0$  Hz, 2H).  **$^{13}C$  NMR** (126 MHz,  $CDCl_3$ )  $\delta$  162.0, 158.7, 145.4

-145.2 (m), 143.4 – 143.2 (m), 141.7 – 141.4 (m), 139.7 – 139.0 (m), 137.3 – 137.0 (m), 129.0, 128.8, 126.7, 110.9 (td,  $J = 17.2, 4.4$  Hz), 110.2, 42.9, 35.8.  $^{19}\text{F}$  NMR (471 MHz,  $\text{CDCl}_3$ )  $\delta$  -143.31 (d,  $J = 20.5$  Hz), -154.92 (t,  $J = 22.0$  Hz), -161.48 (t,  $J = 20.1$  Hz). HRMS calcd. for  $\text{C}_{18}\text{H}_{13}\text{F}_5\text{N}_3$   $[\text{M}+\text{H}]^+$ : 366.1024. Found: 366.1034.

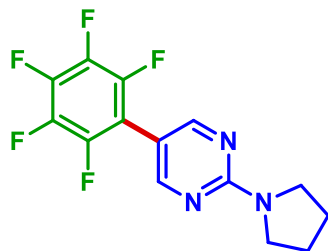

3ia

**5-(perfluorophenyl)-2-(pyrrolidin-1-yl)pyrimidine (3ia):** Yield: 61% (0.061 mmol, 19.5 mg).  $^1\text{H}$  NMR (400 MHz,  $\text{CDCl}_3$ )  $\delta$  8.38 (s, 2H), 3.62 (t,  $J = 6.7$  Hz, 4H), 2.06 – 1.99 (m, 4H).  $^{13}\text{C}$  NMR (126 MHz,  $\text{CDCl}_3$ )  $\delta$  159.7, 158.3 (t,  $J = 2.5$  Hz), 145.4 – 145.2 (m), 143.4 – 143.2 (m), 141.5 – 141.2 (m), 139.5 – 139.0 (m), 137.3 – 137.0 (m), 111.5 – 111.4 (m), 110.5 (s), 108.3 (d,  $J = 1.4$  Hz), 47.0, 25.6;  $^{19}\text{F}$  NMR (376 MHz,  $\text{CDCl}_3$ )  $\delta$  -143.4 (dd,  $J = 23.6, 8.8$  Hz), -155.4 – -155.7 (m), -161.6 – -161.7 (m). HRMS calcd. for  $\text{C}_{14}\text{H}_{11}\text{F}_5\text{N}_3$   $[\text{M}+\text{H}]^+$ : 316.0868. Found: 316.0867.

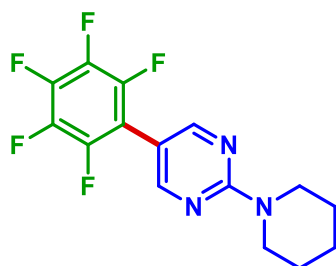

3ja

**5-(perfluorophenyl)-2-(piperidin-1-yl)pyrimidine (3ja):** Yield: 58%. (0.058 mmol, 19 mg).  $^1\text{H}$  NMR (400 MHz,  $\text{CDCl}_3$ )  $\delta$  8.35 (s, 2H), 3.86 – 3.82 (m, 4H), 1.73 – 1.67 (m, 2H), 1.66 – 1.60 (m, 4H).  $^{13}\text{C}$  NMR (101 MHz,  $\text{CDCl}_3$ )  $\delta$  160.95 (s), 158.30 (s), 145.51 (s), 143.02 (s), 141.84 – 141.06 (m), 139.15 (dt,  $J = 17.9, 13.3$  Hz), 136.86 (t,  $J = 13.4$  Hz), 108.22 (s), 45.00 (s), 25.91 (s), 24.90 (s).  $^{19}\text{F}$  NMR (376 MHz,  $\text{CDCl}_3$ )  $\delta$  -143.43 (dd,  $J = 23.1, 8.2$  Hz), -155.61 (t,  $J = 21.0$  Hz), -161.59 – -161.81 (m). HRMS calcd. for  $\text{C}_{15}\text{H}_{13}\text{F}_5\text{N}_3$   $[\text{M}+\text{H}]^+$ : 330.1024 Found: 330.1041.

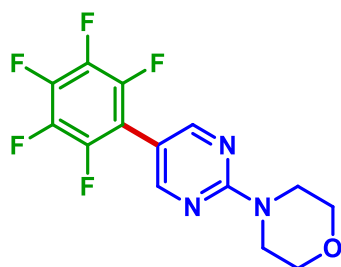

3ka

**4-(5-(perfluorophenyl)pyrimidin-2-yl)morpholine (3ka):** Yield: 65%. (0.065 mmol, 21.5 mg).  $^1\text{H}$  NMR (500 MHz,  $\text{CDCl}_3$ )  $\delta$  8.37 (s, 2H), 3.89 – 3.82 (m, 4H), 3.78 – 3.72 (m, 4H).  $^{13}\text{C}$  NMR (126

MHz, CDCl<sub>3</sub>)  $\delta$  161.1, 158.3 (t,  $J = 2.5$  Hz), 145.3 – 145.1 (m), 143.4 – 143.2 (m), 141.6 – 141.3 (m), 139.8 – 138.9 (m), 137.3 – 136.8 (m), 110.9 (td,  $J = 17.1, 3.9$  Hz), 109.5, 66.8, 44.3. **<sup>19</sup>F NMR** (471 MHz, CDCl<sub>3</sub>)  $\delta$  -143.14 – -143.44 (m), -154.94 (t,  $J = 21.0$  Hz), -161.44 (td,  $J = 22.6, 8.3$  Hz). **HRMS** calcd. for C<sub>14</sub>H<sub>11</sub>F<sub>5</sub>N<sub>3</sub>O [M+H]<sup>+</sup>: 332.0817 Found: 332.0810.

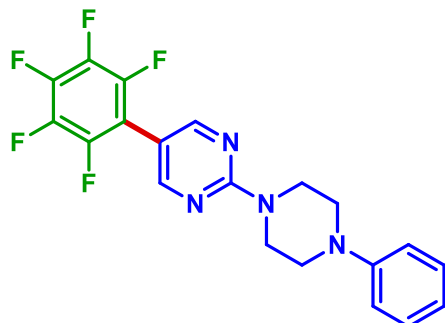

**3la**

**5-(perfluorophenyl)-2-(4-phenylpiperazin-1-yl)pyrimidine (3la):** Yield: 48% (0.048 mmol, 19.5 mg). **<sup>1</sup>H NMR** (400 MHz, CDCl<sub>3</sub>)  $\delta$  8.42 (t,  $J = 1.3$  Hz, 2H), 7.33 – 7.27 (m, 2H), 6.99 (d,  $J = 8.1$  Hz, 2H), 6.91 (t,  $J = 7.3$  Hz, 1H), 4.10 – 4.06 (m, 4H), 3.32 – 3.26 (m, 4H). **<sup>13</sup>C NMR** (126 MHz, CDCl<sub>3</sub>)  $\delta$  161.1, 158.4, 151.3, 145.5 – 145.0 (m), 143.4 – 143.3 (m), 141.7 – 141.3 (m), 139.2 (tdd,  $J = 27.5, 18.0, 12.0$  Hz), 137.8 – 136.7 (m), 129.4, 120.5, 116.7, 110.9 (td,  $J = 17.4, 4.1$  Hz), 109.4, 49.5, 43.9. **<sup>19</sup>F NMR** (376 MHz, CDCl<sub>3</sub>)  $\delta$  -143.27 (dd,  $J = 23.8, 8.8$  Hz), -154.96 (t,  $J = 22.56$  Hz), -161.21 – -161.57 (m). **HRMS** calcd. for C<sub>20</sub>H<sub>16</sub>F<sub>5</sub>N<sub>4</sub> [M+H]<sup>+</sup>: 407.1290 Found: 407.1281.

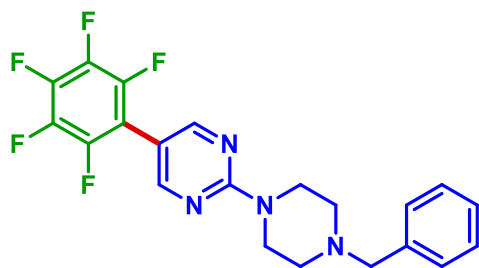

**3ma**

**2-(4-benzylpiperazin-1-yl)-5-(perfluorophenyl)pyrimidine (3ma):** Yield: 42% (0.042 mmol, 17.5 mg). **<sup>1</sup>H NMR** (500 MHz, CDCl<sub>3</sub>)  $\delta$  8.38 (s, 2H), 7.39 – 7.30 (m, 4H), 7.30 – 7.25 (m, 1H), 3.95 – 3.90 (m, 4H), 3.57 (s, 2H), 2.56 – 2.52 (m, 4H). **<sup>13</sup>C NMR** (126 MHz, CDCl<sub>3</sub>)  $\delta$  161.0, 158.3, 145.4 – 145.2 (m), 143.4 – 143.2 (m), 141.7 – 141.2 (m), 139.6 – 138.9 (m), 137.9, 137.4 – 136.9 (m), 129.3, 128.5, 127.4, 111.1 (td,  $J = 17.2, 3.9$  Hz), 108.9, 63.2, 53.0, 43.9. **<sup>19</sup>F NMR** (471 MHz, CDCl<sub>3</sub>)  $\delta$  -143.42 (dd,  $J = 23.2, 8.1$  Hz), -155.26 (t,  $J = 21.0$  Hz), -161.57 (td,  $J = 22.8, 8.2$  Hz). **HRMS** calcd. for C<sub>21</sub>H<sub>18</sub>F<sub>5</sub>N<sub>4</sub> [M+H]<sup>+</sup>: 421.1446 Found: 421.1432.

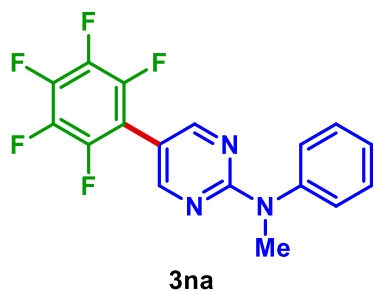

**N-methyl-5-(perfluorophenyl)-N-phenylpyrimidin-2-amine (3na):** Yield: 45% (0.045 mmol, 16 mg).  $^1\text{H NMR}$  (400 MHz,  $\text{CDCl}_3$ )  $\delta$  8.44 (d,  $J = 1.0$  Hz, 2H), 7.45 (dt,  $J = 9.2, 4.6$  Hz, 2H), 7.38 – 7.34 (m, 2H), 7.32 – 7.27 (m, 1H), 3.60 (s, 3H).  $^{13}\text{C NMR}$  (126 MHz,  $\text{CDCl}_3$ )  $\delta$  161.5, 158.3 (t,  $J = 2.5$  Hz), 145.6 – 144.9 (m), 143.3 (ddt,  $J = 10.9, 7.2, 3.8$  Hz), 141.6 (tt,  $J = 13.0, 4.7$  Hz), 140.0 – 138.9 (m), 137.4 – 136.7 (m), 129.5, 126.7 (d,  $J = 14.5$  Hz), 110.9 (td,  $J = 17.2, 4.0$  Hz), 110.2 (d,  $J = 1.3$  Hz), 39.1.  $^{19}\text{F NMR}$  (376 MHz,  $\text{CDCl}_3$ )  $\delta$  -143.22 (dd,  $J = 23.5, 8.6$  Hz), -154.79 (t,  $J = 21.2$  Hz), -161.31 (ddd,  $J = 23.3, 21.1, 8.4$  Hz). **HRMS** calcd. for  $\text{C}_{17}\text{H}_{11}\text{F}_5\text{N}_3$   $[\text{M}+\text{H}]^+$ : 352.0868 Found: 352.0857.

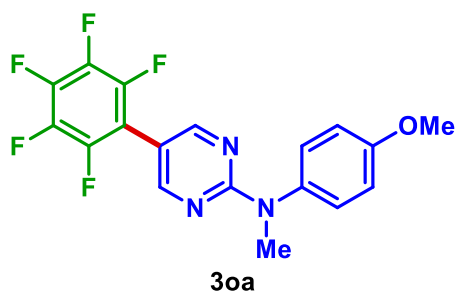

**N-(4-methoxyphenyl)-N-methyl-5-(perfluorophenyl)pyrimidin-2-amine (3oa):** Yield: 52% (0.052 mmol, 20 mg).  $^1\text{H NMR}$  (400 MHz,  $\text{CDCl}_3$ )  $\delta$  8.42 (s, 2H), 7.25 (dd,  $J = 7.2, 5.1$  Hz, 2H), 6.99 – 6.96 (m, 2H), 3.84 (s, 3H), 3.55 (s, 2H).  $^{13}\text{C NMR}$  (126 MHz,  $\text{CDCl}_3$ )  $\delta$  161.8, 158.3, 158.1, 145.4 – 145.2 (m), 143.4 – 143.2 (m), 141.6 – 141.4 (m), 139.6 – 139.0 (m), 137.8, 137.3 – 137.0 (m), 128.0, 114.9, 111.0 (td,  $J = 17.0, 3.9$  Hz), 109.9, 55.6, 39.3.  $^{19}\text{F NMR}$  (376 MHz,  $\text{CDCl}_3$ )  $\delta$  -143.26 (dd,  $J = 23.6, 8.6$  Hz), -154.94 (t,  $J = 22.56$  Hz), -161.30 – -161.45 (m). **HRMS** calcd. for  $\text{C}_{18}\text{H}_{13}\text{F}_5\text{N}_3\text{O}$   $[\text{M}+\text{H}]^+$ : 382.0973 Found: 382.0954.

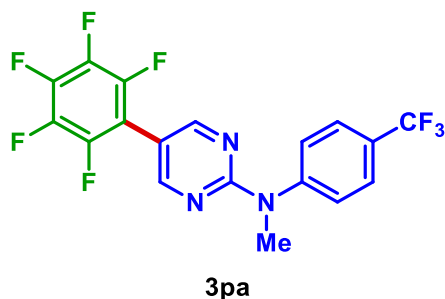

**N-methyl-5-(perfluorophenyl)-N-(4-(trifluoromethyl)phenyl)pyrimidin-2-amine (3pa):** Yield: 60% (0.06 mmol, 25 mg).  $^1\text{H NMR}$  (500 MHz,  $\text{CDCl}_3$ )  $\delta$  8.47 (s, 2H), 7.69 (d,  $J = 8.1$  Hz, 2H), 7.51 (d,  $J = 8.1$  Hz, 2H), 3.64 (s, 3H).  $^{13}\text{C NMR}$  (126 MHz,  $\text{CDCl}_3$ )  $\delta$  161.1, 158.3 (t,  $J = 2.5$  Hz), 147.9, 145.4 – 145.2 (m), 143.4 – 143.2 (m), 142.0 – 141.5 (m), 140.0 – 139.4 (m), 139.4 – 138.7 (m), 137.5



- 137.0 (m), 128.02 (q,  $^2J_F = 32.8$  Hz), 126.5, 126.45 (q,  $^1J_F = 3.6$  Hz), 124.2 (q,  $^3J_F = 272.16$  Hz) 111.3, 110.5 (td,  $J = 17.0, 3.9$  Hz), 38.7.  $^{19}\text{F}$  NMR (471 MHz,  $\text{CDCl}_3$ )  $\delta$  -62.40 (s), -143.28 (dd,  $J = 24.8, 10.4$  Hz), -154.28 (t,  $J = 22.0$  Hz), -161.16 (dd,  $J = 33.1, 23.2$  Hz). HRMS calcd. for  $\text{C}_{18}\text{H}_{10}\text{F}_8\text{N}_3$   $[\text{M}+\text{H}]^+$ : 420.0741 Found:420.0726.

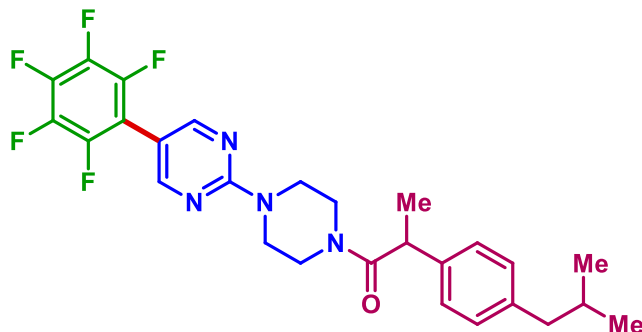

**3qa**

**2-(4-isobutylphenyl)-1-(4-(5-(perfluorophenyl)pyrimidin-2-yl)piperazin-1-yl)propan-1-one**

**(3qa):** Yield: 87% (0.087 mmol, 45 mg).  $^1\text{H}$  NMR (400 MHz,  $\text{CDCl}_3$ )  $\delta$  8.35 (s, 2H), 7.16 (d,  $J = 8.0$  Hz, 2H), 7.09 (d,  $J = 8.1$  Hz, 2H), 4.11 – 4.03 (m, 1H), 4.00 – 3.96 (m, 1H), 3.88 (q,  $J = 6.8$  Hz, 2H), 3.65 – 3.39 (m, 4H), 3.16 – 3.05 (m, 1H), 2.43 (d,  $J = 7.2$  Hz, 2H), 1.83 (dt,  $J = 13.5, 6.7$  Hz, 1H), 1.46 (d,  $J = 6.8$  Hz, 3H), 0.87 (d,  $J = 6.6$  Hz, 6H).  $^{13}\text{C}$  NMR (126 MHz,  $\text{CDCl}_3$ )  $\delta$  172.7, 160.9, 158.3, 145.5 – 145.0 (m), 143.4 – 143.2 (m), 141.8 – 141.3 (m), 140.5, 139.7 – 138.9 (m), 137.4 – 136.8 (m), 129.9, 127.0, 110.8 (td,  $J = 16.8, 3.6$  Hz), 109.6, 45.4, 45.1, 43.6 (d,  $J = 15.0$  Hz), 43.3, 44.0, 30.3, 22.5, 20.8.  $^{19}\text{F}$  NMR (376 MHz,  $\text{CDCl}_3$ )  $\delta$  -143.30 (dd,  $J = 23.8, 8.8$  Hz), -154.73 (t,  $J = 22.56$ ), -161.10 – -161.47 (m). HRMS calcd. for  $\text{C}_{27}\text{H}_{28}\text{F}_5\text{N}_4\text{O}$   $[\text{M}+\text{H}]^+$ : 519.2178 Found:519.2175.

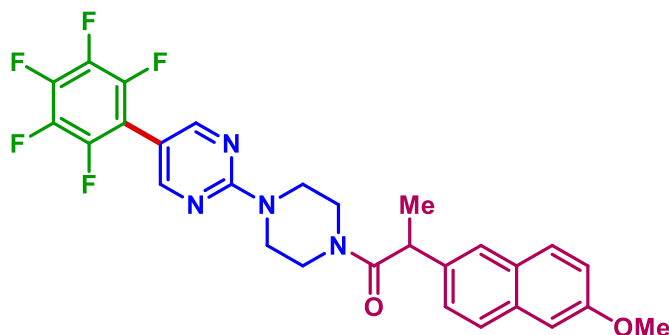

**3ra**

**2-(6-methoxynaphthalen-2-yl)-1-(4-(5-(perfluorophenyl)pyrimidin-2-yl)piperazin-1-yl)propan-1-one**

**(3ra):** Yield: 86% (0.086 mmol, 46.6 mg).  $^1\text{H}$  NMR (500 MHz,  $\text{CDCl}_3$ )  $\delta$  8.32 (s, 2H), 7.70 (dd,  $J = 16.1, 8.7$  Hz, 2H), 7.63 (s, 1H), 7.37 (d,  $J = 8.4$  Hz, 1H), 7.17 – 7.08 (m, 2H), 4.07 – 3.96 (m, 3H), 3.90 (s, 3H), 3.84 (d,  $J = 13.3$  Hz, 1H), 3.64 – 3.48 (m, 4H), 3.15 – 3.06 (m, 1H), 1.55 (d,  $J = 6.7$  Hz, 3H).  $^{13}\text{C}$  NMR (126 MHz,  $\text{CDCl}_3$ )  $\delta$  172.6, 160.8, 158.3, 157.9, 145.3 – 145.2 (m), 143.5 – 142.8 (m), 141.7 – 141.3 (m), 139.8 – 138.8 (m), 137.4 – 136.9 (m), 133.7, 129.3 (d,  $J = 3.4$  Hz), 127.9, 126.0, 125.7, 119.3, 110.7 (td,  $J = 17.1, 3.8$  Hz), 109.6, 105.8, 55.5, 45.4, 43.6 (t,  $J = 7.5$  Hz), 42.0, 20.8.  $^{19}\text{F}$

**NMR** (376 MHz, CDCl<sub>3</sub>)  $\delta$  -143.33 (dd,  $J$  = 23.8, 8.8 Hz), -154.61 – -155.04 (m), -161.32 (qd,  $J$  = 21.3, 8.4 Hz). **HRMS** calcd. for C<sub>28</sub>H<sub>24</sub>F<sub>5</sub>N<sub>4</sub>O<sub>2</sub> [M+H]<sup>+</sup>: 543.1814 Found:543.1808.

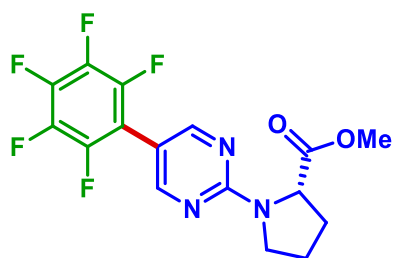

**3sa**

**methyl (5-(perfluorophenyl)pyrimidin-2-yl)prolinate (3sa):** Yield: 78% (0.078 mmol, 29 mg). **<sup>1</sup>H NMR** (400 MHz, CDCl<sub>3</sub>)  $\delta$  8.38 (d,  $J$  = 28.0 Hz, 2H), 4.63 (dd,  $J$  = 8.6, 3.3 Hz, 1H), 3.89 – 3.82 (m, 1H), 3.77 – 3.69 (m, 4H), 2.41 – 2.30 (m, 1H), 2.19 – 2.01 (m, 3H). **<sup>13</sup>C NMR** (126 MHz, CDCl<sub>3</sub>)  $\delta$  173.8, 159.5, 158.4, 158.2, 145.3 – 145.1 (m), 143.4 – 143.2 (m), 141.6 – 141.3 (m), 139.7 – 138.9 (m), 137.3 – 137.0 (m), 111.0 (td,  $J$  = 16.9, 3.7 Hz), 109.7, 59.8, 52.4, 47.4, 30.6, 24.1. **<sup>19</sup>F NMR** (376 MHz, CDCl<sub>3</sub>)  $\delta$  -143.30 (dd,  $J$  = 23.4, 8.6 Hz), -154.92 – -155.15 (m), -161.34 – -161.61 (m). **HRMS** calcd. for C<sub>16</sub>H<sub>13</sub>F<sub>5</sub>N<sub>3</sub>O<sub>2</sub> [M+H]<sup>+</sup>: 374.0922 Found:374.0892.

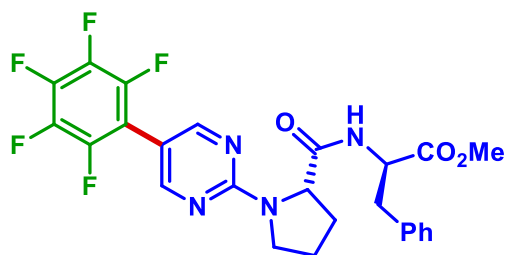

**3ta**

**methyl (5-(perfluorophenyl)pyrimidin-2-yl)prolylphenylalaninate (3ta):** Yield: 48% (0.048 mmol, 25 mg). **<sup>1</sup>H NMR** (400 MHz, CDCl<sub>3</sub>)  $\delta$  8.32 (s, 2H), 7.41 (d,  $J$  = 7.8 Hz, 1H), 7.12 – 7.03 (m, 3H), 6.95 (dd,  $J$  = 7.5, 1.5 Hz, 2H), 4.88 (dt,  $J$  = 7.7, 5.8 Hz, 1H), 4.65 – 4.59 (m, 1H), 3.71 – 3.58 (m, 5H), 3.16 (dd,  $J$  = 13.9, 5.6 Hz, 1H), 2.99 (dd,  $J$  = 13.9, 6.0 Hz, 1H), 2.37 (ddd,  $J$  = 11.8, 7.3, 4.4 Hz, 1H), 2.07 – 1.98 (m, 3H). **<sup>13</sup>C NMR** (126 MHz, CDCl<sub>3</sub>)  $\delta$  171.9, 171.5, 160.0, 158.2, 145.3 – 145.2 (m), 143.54 – 143.11 (m), 142.16 – 141.32 (m), 139.7 – 139.0 (m), 137.4 – 136.8 (m), 135.9, 129.2, 128.3, 127.0, 110.7 (td,  $J$  = 17.2, 3.7 Hz), 110.0, 60.9, 53.2, 52.4, 48.1, 37.8, 29.1, 24.4. **<sup>19</sup>F NMR** (376 MHz, CDCl<sub>3</sub>)  $\delta$  -143.31 (dd,  $J$  = 23.8, 8.9 Hz), -154.56 (t,  $J$  = 18.8 Hz), -161.01 – -161.40 (m). **HRMS** calcd. for C<sub>25</sub>H<sub>22</sub>F<sub>5</sub>N<sub>4</sub>O<sub>3</sub> [M+H]<sup>+</sup>: 521.1607 Found: 521.1595.

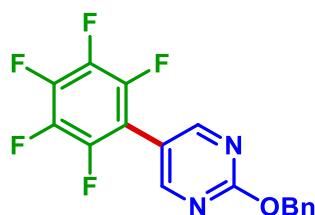

**3ua**

**2-(benzyloxy)-5-(perfluorophenyl)pyrimidine (3ua):** Yield: 42% (0.042 mmol, 15.7 mg).  $^1\text{H NMR}$  (500 MHz,  $\text{CDCl}_3$ )  $\delta$  8.63 (s, 2H), 7.51 (d,  $J = 7.3$  Hz, 2H), 7.39 (t,  $J = 7.3$  Hz, 2H), 7.34 (t,  $J = 7.3$  Hz, 1H), 5.53 (s, 2H).  $^{13}\text{C NMR}$  (126 MHz,  $\text{CDCl}_3$ )  $\delta$  165.2, 160.0 (d,  $J = 2.4$  Hz), 145.4 – 145.2 (m), 143.5 – 143.2 (m), 142.4 – 142.1 (m), 140.4 – 140.1 (m), 139.4 – 139.0 (m), 137.4 – 137.1 (m), 136.1, 128.7, 128.4, 128.3, 115.4, 109.7 (td,  $J = 17.2, 4.3$  Hz), 69.8.  $^{19}\text{F NMR}$  (471 MHz,  $\text{CDCl}_3$ )  $\delta$  -142.77 (dd,  $J = 22.5, 8.2$  Hz), -152.79 (t,  $J = 21.0$  Hz), -160.63 (td,  $J = 22.1, 7.8$  Hz). **HRMS** calcd. for  $\text{C}_{17}\text{H}_9\text{F}_5\text{N}_2\text{O}$   $[\text{M}+\text{Na}]^+$ : 375.0527 Found: 375.0544.

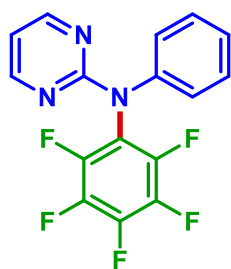

**4aa**

**N-(perfluorophenyl)-N-phenylpyrimidin-2-amine (4aa):** Yield: 56% (0.056 mmol, 19 mg).  $^1\text{H NMR}$  (500 MHz,  $\text{CDCl}_3$ )  $\delta$  8.39 (d,  $J = 4.8$  Hz, 2H), 7.45 – 7.37 (m, 4H), 7.31 (dt,  $J = 8.4, 1.3$  Hz, 1H), 6.81 (t,  $J = 4.8$  Hz, 1H).  $^{13}\text{C NMR}$  (126 MHz,  $\text{CDCl}_3$ )  $\delta$  161.0, 158.4, 146.3 – 146.2 (m), 144.3 – 144.2 (m), 142.2 – 141.9 (m), 141.7, 140.2 – 139.8 (m), 139.5 – 139.2 (m), 137.5 – 137.2 (m), 129.7, 127.5, 127.3, 119.3 – 119.0 (m), 113.9.  $^{19}\text{F NMR}$  (376 MHz,  $\text{CDCl}_3$ )  $\delta$  -144.40 – -144.59 (m), -155.65 (t,  $J = 21.5$  Hz), -161.93 – -162.18 (m). **HRMS** calcd. for  $\text{C}_{16}\text{H}_9\text{F}_5\text{N}_3$   $[\text{M}+\text{H}]^+$ : 338.0711 Found: 338.0715.

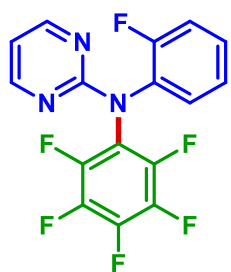

**4ba**

**N-(2-fluorophenyl)-N-(perfluorophenyl)pyrimidin-2-amine (4ba):** Yield: 50% (0.050 mmol, 17.75 mg).  $^1\text{H NMR}$  (500 MHz,  $\text{CDCl}_3$ )  $\delta$  8.40 (d,  $J = 4.8$  Hz, 2H), 7.39 – 7.31 (m, 2H), 7.22 – 7.16 (m, 2H), 6.84 (t,  $J = 4.8$  Hz, 1H).  $^{13}\text{C NMR}$  (101 MHz,  $\text{CDCl}_3$ )  $\delta$  160.3, 159.9, 158.5, 157.4, 146.5 – 146.3 (qd,  $J = 6.8, 2.7$  Hz), 144.0 – 143.8 (m), 142.4 – 141.9 (m), 139.7 – 139.3 (m), 137.1 – 136.8 (m), 129.6, 129.5 (d,  $J = 8.1$  Hz), 129.0 (d,  $J = 12.0$  Hz), 125.0 (d,  $J = 3.8$  Hz), 118.4 – 118.1 (m), 117.2, 117.0, 114.3.  $^{19}\text{F NMR}$  (376 MHz,  $\text{CDCl}_3$ )  $\delta$  -117.45 – -117.89 (m), -143.89 (dd,  $J = 16.3, 8.3$  Hz), -155.79 (t,  $J = 21.5$  Hz), -162.10 – -162.43 (m). **HRMS** calcd. for  $\text{C}_{16}\text{H}_8\text{F}_6\text{N}_3$   $[\text{M}+\text{H}]^+$ : 356.0617 Found: 356.0612.

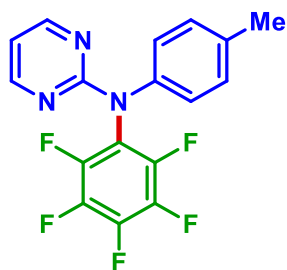

4ca

**N-(perfluorophenyl)-N-(p-tolyl)pyrimidin-2-amine (4ca):** Yield: 35% (0.035 mmol, 12.3 mg).  $^1\text{H NMR}$  (500 MHz,  $\text{CDCl}_3$ )  $\delta$  8.38 (d,  $J = 4.8$  Hz, 2H), 7.28 (d,  $J = 8.3$  Hz, 2H), 7.23 (d,  $J = 8.2$  Hz, 2H), 6.78 (t,  $J = 4.8$  Hz, 1H), 2.37 (s, 3H).  $^{13}\text{C NMR}$  (126 MHz,  $\text{CDCl}_3$ )  $\delta$  161.5, 158.4, 146.4 – 146.0 (m), 144.4 – 144.0 (m), 142.1 – 141.6 (m), 140.1 – 139.6 (m), 139.5 – 138.7 (m), 137.6 – 137.0 (m), 130.3, 127.3, 119.4 (td,  $J = 14.3, 4.3$  Hz), 113.7, 21.3.  $^{19}\text{F NMR}$  (471 MHz,  $\text{CDCl}_3$ )  $\delta$  -144.64 (d,  $J = 20.2$  Hz), -156.14 – -156.32 (m), -161.88 – -162.94 (m). **HRMS** calcd. for  $\text{C}_{17}\text{H}_{11}\text{F}_5\text{N}_3$   $[\text{M}+\text{H}]^+$ : 352.0868 Found: 352.0856.

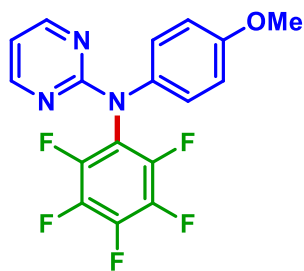

4da

**N-(4-methoxyphenyl)-N-(perfluorophenyl)pyrimidin-2-amine (4da):** Yield: 36% (0.036 mmol, 13.2 mg).  $^1\text{H NMR}$  (400 MHz,  $\text{CDCl}_3$ )  $\delta$  8.38 (d,  $J = 4.8$  Hz, 2H), 7.36 – 7.31 (m, 2H), 6.97 – 6.91 (m, 2H), 6.78 (t,  $J = 4.8$  Hz, 1H), 3.82 (s, 3H).  $^{13}\text{C NMR}$  (101 MHz,  $\text{CDCl}_3$ )  $\delta$  161.3, 158.7, 158.2, 146.3 – 146.0 (m), 143.8 – 143.5 (m), 142.1 – 141.8 (m), 139.6 – 139.2 (m), 137.0 – 136.7 (m), 134.3, 128.9, 119.4 – 119.1 (m), 114.8, 113.4, 55.4.  $^{19}\text{F NMR}$  (471 MHz,  $\text{CDCl}_3$ )  $\delta$  -144.80 (dd,  $J = 22.4, 5.7$  Hz), -156.11 (t,  $J = 21.5$  Hz), -162.25 (td,  $J = 21.8, 5.0$  Hz). **HRMS** calcd. for  $\text{C}_{17}\text{H}_{11}\text{F}_5\text{N}_3\text{O}$   $[\text{M}+\text{H}]^+$ : 368.0817 Found: 368.0832.

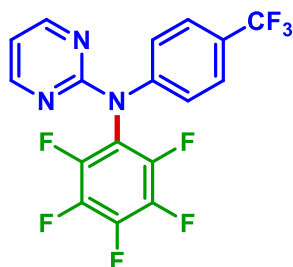

4ea

**N-(perfluorophenyl)-N-(4-(trifluoromethyl)phenyl)pyrimidin-2-amine (4ea):** Yield: 54% (0.054 mmol, 21.9 mg).  $^1\text{H NMR}$  (500 MHz,  $\text{CDCl}_3$ )  $\delta$  8.42 (d,  $J = 4.8$  Hz, 2H), 7.66 (d,  $J = 8.4$  Hz, 2H), 7.48

(d,  $J = 8.4$  Hz, 2H), 6.88 (t,  $J = 4.8$  Hz, 1H).  $^{13}\text{C NMR}$  (126 MHz,  $\text{CDCl}_3$ )  $\delta$  160.7, 158.5, 146.4 – 146.2 (m), 144.9, 144.4 – 144.2 (m), 142.4 – 142.2 (m), 140.4 – 140.1 (m), 139.5 – 139.2 (m), 137.5 – 137.2 (m), 128.8 (q,  $^2J_{\text{F}} = 32.8$  Hz), 128.1, 126.7 – 126.6 (m), 124.0 (q,  $^3J_{\text{F}} = 272.2$  Hz), 118.9 – 118.4 (m), 114.7.  $^{19}\text{F NMR}$  (471 MHz,  $\text{CDCl}_3$ )  $\delta$  -62.51 (s), -144.61 (d,  $J = 18.8$  Hz), -154.00 – -155.85 (m), -161.70 (t,  $J = 20.5$  Hz). **HRMS** calcd. for  $\text{C}_{17}\text{H}_8\text{F}_8\text{N}_3$   $[\text{M}+\text{H}]^+$ : 406.0585 Found: 406.0576.

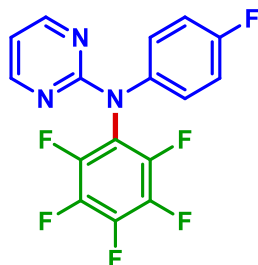

**4fa**

**N-(4-fluorophenyl)-N-(perfluorophenyl)pyrimidin-2-amine (4fa):** Yield: 53% (0.053 mmol, 18.8 mg).  $^1\text{H NMR}$  (500 MHz,  $\text{CDCl}_3$ )  $\delta$  8.39 (d,  $J = 4.8$  Hz, 1H), 7.41 – 7.35 (m, 2H), 7.16 – 7.07 (m, 2H), 6.81 (t,  $J = 4.8$  Hz, 1H).  $^{13}\text{C NMR}$  (126 MHz,  $\text{CDCl}_3$ )  $\delta$  162.5, 161.3, 160.5, 158.4, 146.3 – 146.1 (m), 144.3 – 144.1 (m), 142.2 – 141.9 (m), 140.2 – 139.9 (m), 139.6 – 139.0 (m), 137.7 (d,  $J = 3.0$  Hz), 137.4 – 137.2 (m), 129.4 (d,  $J = 8.8$  Hz), 119.1 (td,  $J = 14.4, 4.3$  Hz), 116.7, 116.5, 113.9.  $^{19}\text{F NMR}$  (471 MHz,  $\text{CDCl}_3$ )  $\delta$  -113.82 (s), -144.76 (d,  $J = 24.1$  Hz), -155.56 (t,  $J = 22.6$  Hz), -162.04 (t,  $J = 20.1$  Hz). **HRMS** calcd. for  $\text{C}_{16}\text{H}_8\text{F}_6\text{N}_3$   $[\text{M}+\text{H}]^+$ : 356.0617 Found: 356.0628.

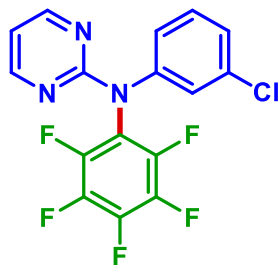

**4ga**

**N-(3-chlorophenyl)-N-(perfluorophenyl)pyrimidin-2-amine (4ga):** Yield: 48% (0.048 mmol, 17.8 mg).  $^1\text{H NMR}$  (500 MHz,  $\text{CDCl}_3$ )  $\delta$  8.40 (d,  $J = 4.8$  Hz, 2H), 7.39 – 7.32 (m, 2H), 7.30 – 7.26 (m, 2H), 6.84 (t,  $J = 4.8$  Hz, 1H).  $^{13}\text{C NMR}$  (126 MHz,  $\text{CDCl}_3$ )  $\delta$  160.9, 158.4, 146.3 – 146.1 (m), 144.3 – 144.1 (m), 142.9, 142.3 – 142.0 (m), 140.3 – 140.0 (m), 139.5 – 139.2 (m), 137.5 – 137.2 (m), 133.0, 130.4, 127.5, 127.4, 125.3, 118.8 (td,  $J = 14.3, 4.4$  Hz), 114.4.  $^{19}\text{F NMR}$  (376 MHz,  $\text{CDCl}_3$ )  $\delta$  -143.42 – -145.60 (m), -155.03 (t,  $J = 21.5$  Hz), -160.83 – -162.85 (m). **HRMS** calcd. for  $\text{C}_{16}\text{H}_8\text{ClF}_5\text{N}_3$   $[\text{M}+\text{H}]^+$ : 372.0321 Found: 372.0322.

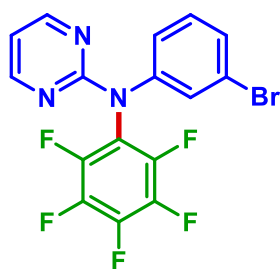

**4ha**

**N-(3-bromophenyl)-N-(perfluorophenyl)pyrimidin-2-amine (4ha):** Yield: 38% (0.038 mmol, 15.7 mg).  $^1\text{H NMR}$  (500 MHz,  $\text{CDCl}_3$ )  $\delta$  8.40 (d,  $J = 4.8$  Hz, 2H), 7.52 (t,  $J = 1.8$  Hz, 1H), 7.44 – 7.42 (m, 1H), 7.35 – 7.31 (m, 1H), 7.28 (t,  $J = 7.9$  Hz, 1H), 6.84 (t,  $J = 4.8$  Hz, 1H).  $^{13}\text{C NMR}$  (101 MHz,  $\text{CDCl}_3$ )  $\delta$  160.8, 158.4, 146.6 – 146.3 (m), 144.1 – 143.8 (m), 143.0, 142.6 – 142.3 (m), 140.0 – 139.4 (m), 137.3 – 136.9 (m), 130.7, 130.4, 130.2, 125.9, 122.8, 118.8 – 118.5 (m), 114.4.  $^{19}\text{F NMR}$  (471 MHz,  $\text{CDCl}_3$ )  $\delta$  -144.54 (d,  $J = 18.8$  Hz), -155.14 (t,  $J = 21.7$  Hz), -161.83 (t,  $J = 20.6$  Hz). **HRMS** calcd. for  $\text{C}_{16}\text{H}_8^{79}\text{BrF}_5\text{N}_3$   $[\text{M}+\text{H}]^+$ : 415.9822 Found: 415.9833,  $\text{C}_{16}\text{H}_8^{81}\text{BrF}_5\text{N}_3$   $[\text{M}+\text{H}]^+$ : 417.9803 Found: 417.9813.

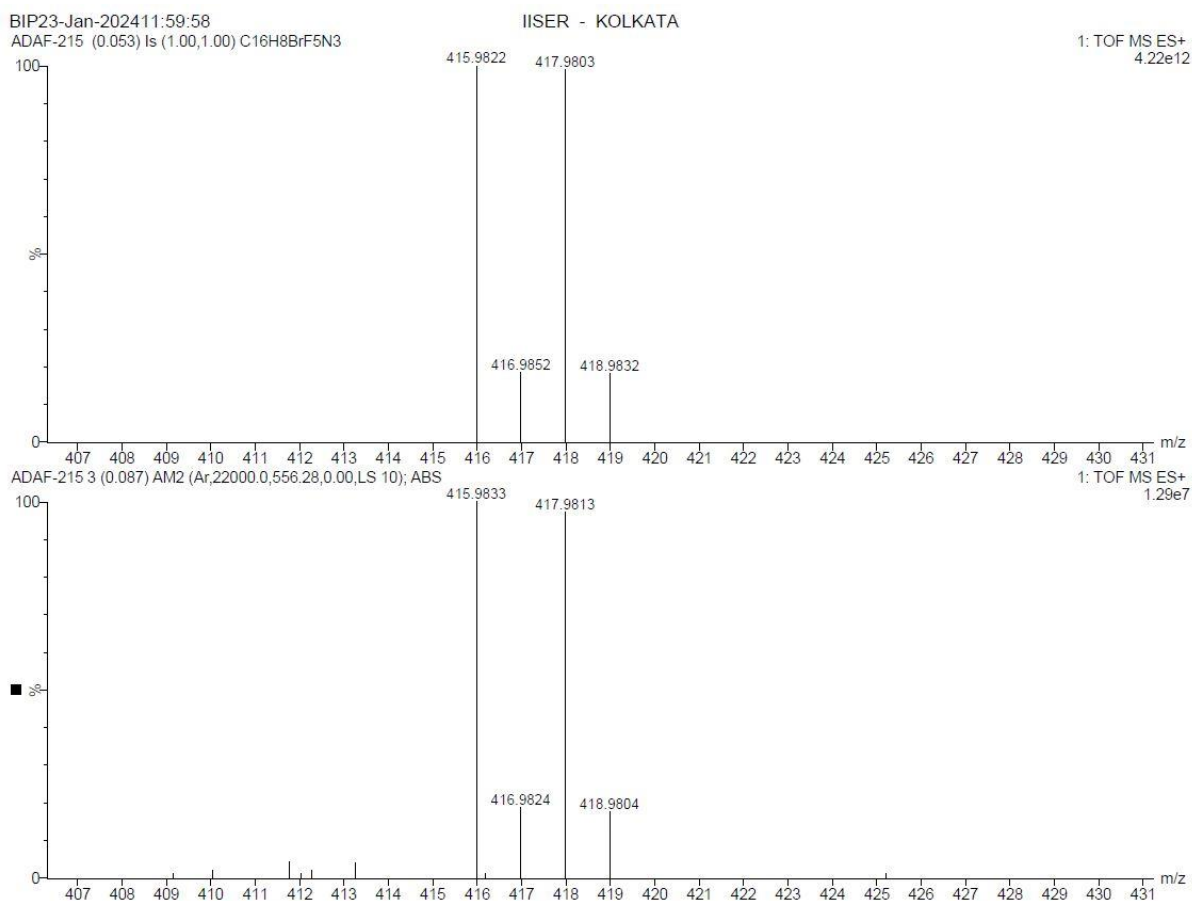

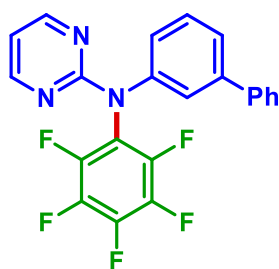

4ia

**N-([1,1'-biphenyl]-3-yl)-N-(perfluorophenyl)pyrimidin-2-amine (4ia):** Yield: 54% (0.054 mmol, 22.3 mg).  $^1\text{H NMR}$  (400 MHz,  $\text{CDCl}_3$ )  $\delta$  8.41 (d,  $J = 4.8$  Hz), 7.61 – 7.53 (m), 7.50 (t,  $J = 7.7$  Hz), 7.47 – 7.42 (m), 7.36 (ddd,  $J = 6.3, 5.6, 4.3$  Hz), 6.82 (t,  $J = 4.8$  Hz).  $^{13}\text{C NMR}$  (126 MHz,  $\text{CDCl}_3$ )  $\delta$  161.2, 158.4, 146.4 – 146.2 (m), 144.4 – 144.2 (m), 143.0, 142.2 – 141.9 (m), 140.5, 140.2 – 139.9 (m), 139.5 – 139.2 (m), 137.5 – 137.2 (m), 123.0, 129.0, 127.8, 127.4, 126.3, 126.1, 119.2 (td,  $J = 14.6, 4.4$  Hz), 113.9.  $^{19}\text{F NMR}$  (471 MHz,  $\text{CDCl}_3$ )  $\delta$  -144.49 (d,  $J = 20.2$  Hz), -155.75 (t,  $J = 21.1$  Hz), -162.09 (dd,  $J = 31.1, 13.9$  Hz). **HRMS** calcd. for  $\text{C}_{22}\text{H}_{13}\text{F}_5\text{N}_3$   $[\text{M}+\text{H}]^+$ : 414.1024 Found: 414.1026.

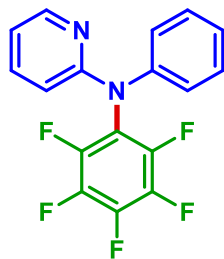

4ja

**N-(perfluorophenyl)-N-phenylpyridin-2-amine (4ja):** Yield: 52% (0.052 mmol, 17.5 mg).  $^1\text{H NMR}$  (500 MHz,  $\text{CDCl}_3$ )  $\delta$  8.17 – 8.15 (m, 1H), 7.51 – 7.47 (m, 1H), 7.43 – 7.39 (m, 2H), 7.33 – 7.26 (m, 3H), 6.82 (ddd,  $J = 7.2, 5.0, 0.9$  Hz, 1H), 6.72 (dt,  $J = 8.5, 0.8$  Hz, 1H).  $^{13}\text{C NMR}$  (126 MHz,  $\text{CDCl}_3$ )  $\delta$  157.3, 148.4, 146.5 – 146.3 (m), 144.5 – 144.3 (m), 143.0, 141.6 – 141.3 (m), 139.5 – 139.2 (m), 137.9, 137.5 – 137.2 (m), 130.1, 126.9, 126.5, 120.2 – 119.8 (m), 116.6, 110.0.  $^{19}\text{F NMR}$  (471 MHz,  $\text{CDCl}_3$ )  $\delta$  -144.81 (d,  $J = 19.3$  Hz), -157.39 (t,  $J = 20.5$  Hz), -162.64 (t,  $J = 20.8$  Hz). **HRMS** calcd. for  $\text{C}_{17}\text{H}_{10}\text{F}_5\text{N}_2$   $[\text{M}+\text{H}]^+$ : 337.0759 Found: 337.0763.

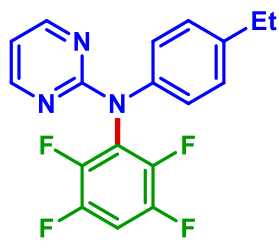

4kb

**N-(4-ethylphenyl)-N-(2,3,5,6-tetrafluorophenyl)pyrimidin-2-amine (4kb):** Yield: 44% (0.044 mmol, 15.3 mg).  $^1\text{H NMR}$  (500 MHz,  $\text{CDCl}_3$ )  $\delta$  8.39 (d,  $J = 4.8$  Hz, 2H), 7.31 (d,  $J = 8.3$  Hz, 2H), 7.25 (d,  $J = 8.5$  Hz, 2H), 7.04 (tt,  $J = 9.8, 7.2$  Hz, 1H), 6.77 (t,  $J = 4.8$  Hz, 1H), 2.67 (q,  $J = 7.6$  Hz, 2H),

1.28 – 1.24 (m, 3H).  $^{13}\text{C}$  NMR (101 MHz, )  $\delta$  161.5, 158.3, 147.8 – 147.5 (m), 145.9 – 145.7 (ddd,  $J = 10.5, 4.2, 2.7$  Hz), 145.4 – 145.1 (m), 143.4 – 143.2 (m), 139.4, 129.0, 127.3, 124.5 – 124.2 (tt,  $J = 13.8, 2.9$  Hz), 113.6, 105.0, 104.8, 104.5, 28.6, 15.3.  $^{19}\text{F}$  NMR (471 MHz,  $\text{CDCl}_3$ )  $\delta$  -139.10 (dd,  $J = 21.9, 10.9$  Hz), -144.95 (dd,  $J = 21.9, 11.0$  Hz). HRMS calcd. for  $\text{C}_{18}\text{H}_{14}\text{F}_4\text{N}_3$   $[\text{M}+\text{H}]^+$ : 348.1118 Found: 348.1114.

## 7. Synthetic applications

### 7.1 Late-stage functionalization of Buspirone

The reaction was performed according to the standard procedure.

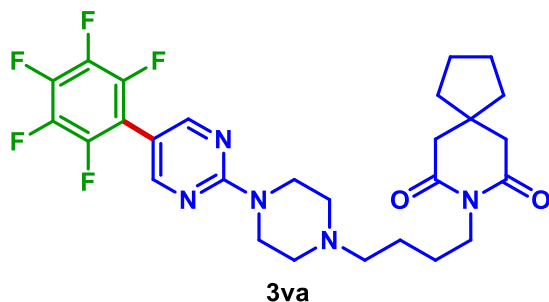

**8-(4-(4-(5-(perfluorophenyl)pyrimidin-2-yl)piperazin-1-yl)butyl)-8-azaspiro[4.5]decane-7,9-dione (3va):** Yield: 55% (0.2 mmol, 61 mg).  $^1\text{H}$  NMR (400 MHz,  $\text{CDCl}_3$ )  $\delta$  8.38 (s, 1H), 3.93 (s, 2H), 3.79 (t,  $J = 6.8$  Hz, 1H), 2.59 – 2.54 (m, 8H), 2.44 (br s, 2H), 1.73 – 1.69 (m, 4H), 1.56 (s, 4H), 1.50 (t,  $J = 7.0$  Hz, 2H).  $^{13}\text{C}$  NMR (126 MHz,  $\text{CDCl}_3$ )  $\delta$  172.4, 160.9, 158.4, 145.5 – 145.1 (m), 143.5 – 143.1 (m), 141.6 – 141.3 (m), 139.6 – 138.9 (m), 137.4 – 136.8 (m), 111.0 (t,  $J = 18.5$  Hz), 109.2, 58.2, 53.0, 45.1, 43.5, 39.6, 39.3, 37.7, 26.0, 24.3.  $^{19}\text{F}$  NMR (471 MHz,  $\text{CDCl}_3$ )  $\delta$  -142.11 – -146.57 (m), -153.98 – -157.43 (m), -161.39 – -161.77 (m). HRMS calcd. for  $\text{C}_{27}\text{H}_{31}\text{F}_5\text{N}_5\text{O}_2$   $[\text{M}+\text{H}]^+$ : 552.2392 Found: 552.2395.

### 7.2 Deprotection of tert-butyl group

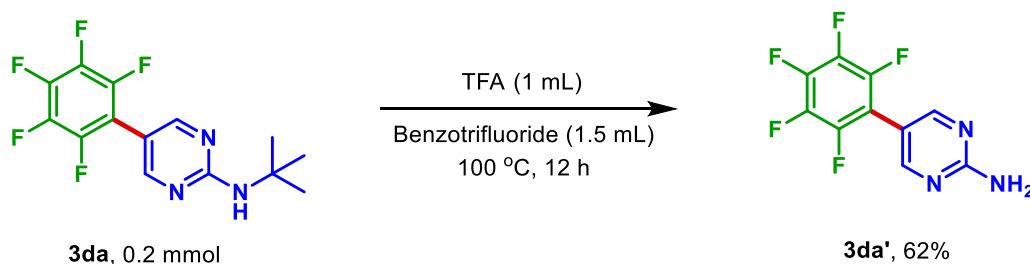

An oven-dried 10 mL round bottom flask was charged with a magnetic stir-bar, **3da** (0.2 mmol) and benzotrifluoride (1.5 mL) were taken under a nitrogen atmosphere. Subsequently, TFA (1.0 mL) was added. The round bottom flask was placed in a preheated oil bath at 100 °C and refluxed for 12 h. The reaction mixture was allowed to cool at room temperature, basified with saturated  $\text{Na}_2\text{CO}_3$  to pH 9, and extracted with DCM. The organic layer was dried with sodium sulfate, filtered, and concentrated under reduced pressure. The purification was carried out by column chromatography over silica gel (hexane/EtOAc) to give **3da'** in 62% yield.



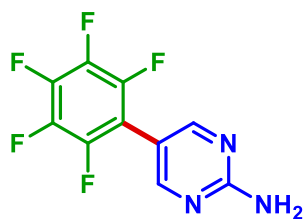

**3da'**

**5-(perfluorophenyl)pyrimidin-2-amine (3da', FAP):**<sup>27</sup>  $^1\text{H NMR}$  (400 MHz,  $\text{DMSO-}d_6$ )  $\delta$  7.48 (d,  $J$  = 1.1 Hz, 2H), 6.26 (s, 2H).  $^{13}\text{C NMR}$  (101 MHz,  $\text{DMSO-}d_6$ )  $\delta$  163.4, 158.7, 145.0 – 144.9 (m), 142.7 – 142.4 (m), 140.9 – 140.7 (m), 138.7 – 138.3 (m), 136.2 – 135.9 (m), 111.10 (td,  $J$  = 17.6, 3.7 Hz), 108.6.  $^{19}\text{F NMR}$  (376 MHz,  $\text{DMSO-}d_6$ )  $\delta$  -143.47 (dd,  $J$  = 24.4, 7.3 Hz), -156.36 (t,  $J$  = 22.3 Hz), -162.48 – -162.72 (m).

## 8. Crystal Data

### 8.1 Product 3aa and 4ca

Compounds **3aa** and **4ca** were dissolved in a minimum volume of methanol and kept in room temperature for slow evaporation (5 days). Needle-shaped colorless crystals were formed, which were subjected to X-ray diffraction.

Intensity data were collected on an XtaLAB Synergy, Dualflex, HyPix3000 diffractometer. The crystal was kept at 100.00 K during the data collection. The software Olex2 was used for space group, structure determination, and refinements. The least-squares refinement techniques on F2 were performed until the model converged. All non-hydrogen atoms were refined with anisotropic displacement parameters. All hydrogen atoms were fixed at calculated positions, and their positions were refined by a riding model.

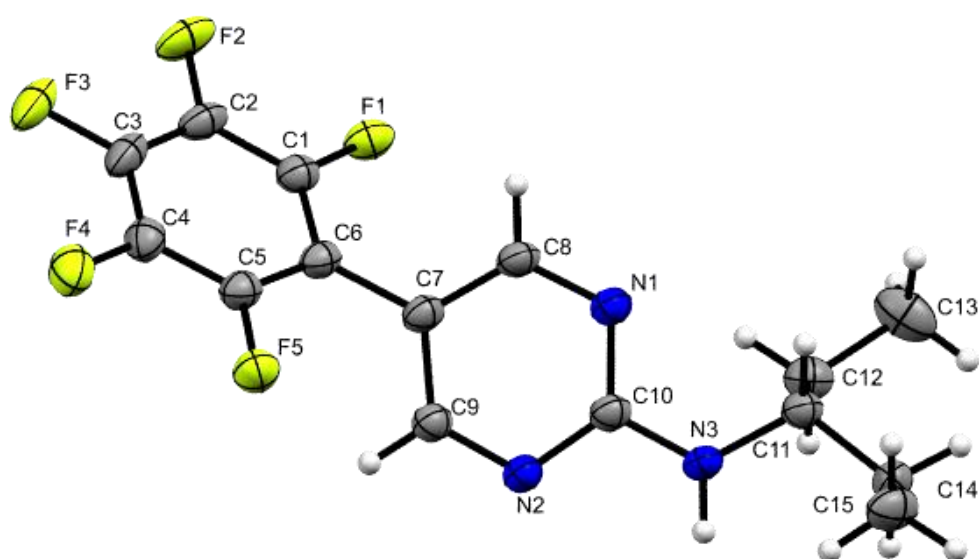

**Fig S1:** Molecular structure of final product **3aa** (ORTEP view)

**Table S8: Crystal data and structure refinement for 3aa (CCDC 2327240).**

|                                             |                                                               |
|---------------------------------------------|---------------------------------------------------------------|
| Identification code                         | ADA_AB_272_auto_1                                             |
| Empirical formula                           | C <sub>15</sub> H <sub>14</sub> F <sub>5</sub> N <sub>3</sub> |
| Formula weight                              | 331.29                                                        |
| Temperature/K                               | 100.4(9)                                                      |
| Crystal system                              | monoclinic                                                    |
| Space group                                 | P2 <sub>1</sub> /c                                            |
| a/Å                                         | 12.4951(3)                                                    |
| b/Å                                         | 7.6806(2)                                                     |
| c/Å                                         | 16.1712(5)                                                    |
| α/°                                         | 90                                                            |
| β/°                                         | 108.511(3)                                                    |
| γ/°                                         | 90                                                            |
| Volume/Å <sup>3</sup>                       | 1471.65(7)                                                    |
| Z                                           | 4                                                             |
| ρ <sub>calc</sub> /cm <sup>3</sup>          | 1.495                                                         |
| μ/mm <sup>-1</sup>                          | 1.187                                                         |
| F(000)                                      | 680.0                                                         |
| Crystal size/mm <sup>3</sup>                | 0.2 × 0.07 × 0.01                                             |
| Radiation                                   | Cu Kα (λ = 1.54184)                                           |
| 2θ range for data collection/°              | 7.462 to 136.144                                              |
| Index ranges                                | -14 ≤ h ≤ 15, -9 ≤ k ≤ 9, -19 ≤ l ≤ 17                        |
| Reflections collected                       | 16716                                                         |
| Independent reflections                     | 2682 [R <sub>int</sub> = 0.0663, R <sub>sigma</sub> = 0.0353] |
| Data/restraints/parameters                  | 2682/0/210                                                    |
| Goodness-of-fit on F <sup>2</sup>           | 1.054                                                         |
| Final R indexes [I ≥ 2σ (I)]                | R <sub>1</sub> = 0.0446, wR <sub>2</sub> = 0.1260             |
| Final R indexes [all data]                  | R <sub>1</sub> = 0.0504, wR <sub>2</sub> = 0.1326             |
| Largest diff. peak/hole / e Å <sup>-3</sup> | 0.32/-0.23                                                    |

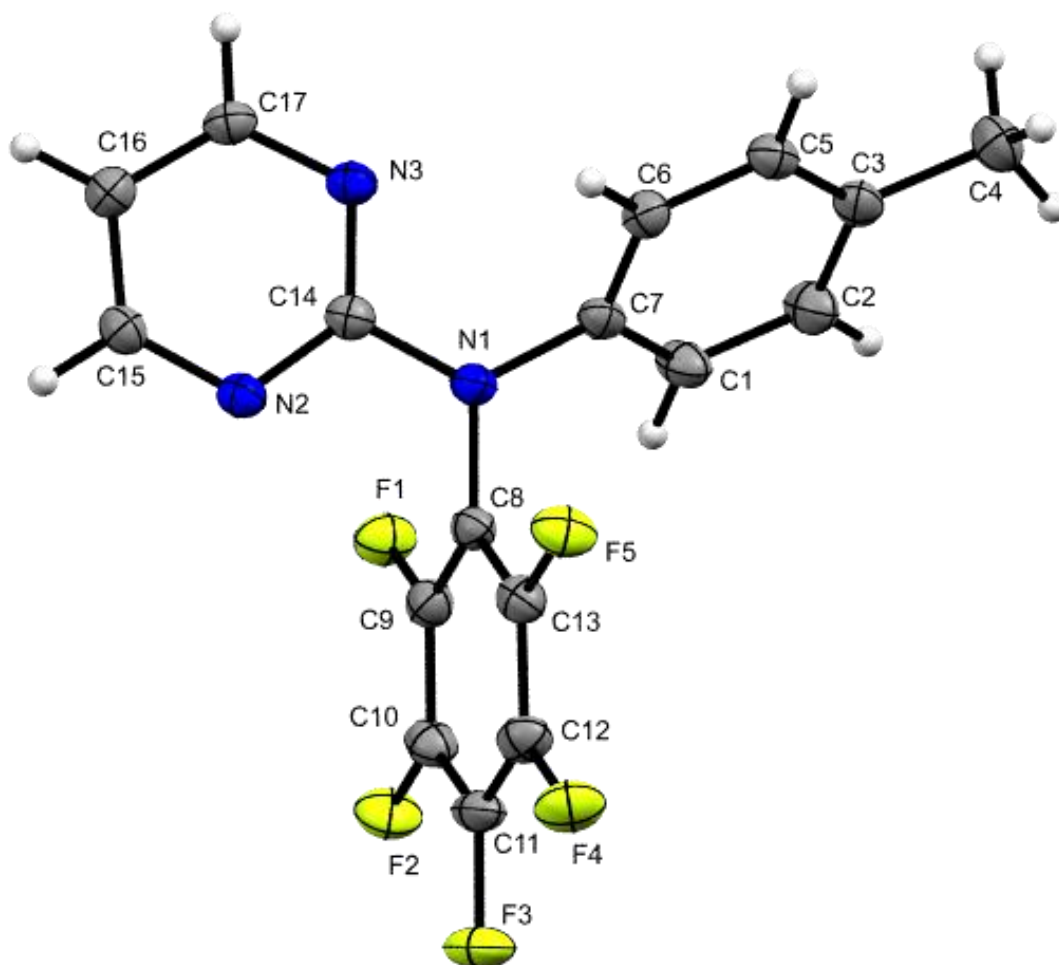

**Fig S2:** Molecular structure of final product **4ca** (ORTEP view)

**Table S9:** Crystal data and structure refinement for **4ca** (CCDC 2311113).

|                     |                                                               |
|---------------------|---------------------------------------------------------------|
| Identification code | ADAAF115_auto                                                 |
| Empirical formula   | C <sub>17</sub> H <sub>10</sub> F <sub>5</sub> N <sub>3</sub> |
| Formula weight      | 351.28                                                        |
| Temperature/K       | 99.99(11)                                                     |
| Crystal system      | monoclinic                                                    |
| Space group         | P2 <sub>1</sub> /c                                            |
| a/Å                 | 14.4065(2)                                                    |
| b/Å                 | 6.17670(10)                                                   |
| c/Å                 | 17.7705(3)                                                    |
| α/°                 | 90                                                            |
| β/°                 | 109.917(2)                                                    |
| γ/°                 | 90                                                            |

|                                             |                                                               |
|---------------------------------------------|---------------------------------------------------------------|
| Volume/Å <sup>3</sup>                       | 1486.72(4)                                                    |
| Z                                           | 4                                                             |
| ρ <sub>calc</sub> /cm <sup>3</sup>          | 1.569                                                         |
| μ/mm <sup>-1</sup>                          | 1.223                                                         |
| F(000)                                      | 712.0                                                         |
| Crystal size/mm <sup>3</sup>                | 0.3 × 0.04 × 0.01                                             |
| Radiation                                   | Cu Kα (λ = 1.54184)                                           |
| 2θ range for data collection/°              | 6.526 to 136.282                                              |
| Index ranges                                | -17 ≤ h ≤ 17, -7 ≤ k ≤ 7, -21 ≤ l ≤ 21                        |
| Reflections collected                       | 19619                                                         |
| Independent reflections                     | 2708 [R <sub>int</sub> = 0.0362, R <sub>sigma</sub> = 0.0190] |
| Data/restraints/parameters                  | 2708/0/227                                                    |
| Goodness-of-fit on F <sup>2</sup>           | 1.045                                                         |
| Final R indexes [I ≥ 2σ (I)]                | R <sub>1</sub> = 0.0330, wR <sub>2</sub> = 0.0888             |
| Final R indexes [all data]                  | R <sub>1</sub> = 0.0355, wR <sub>2</sub> = 0.0912             |
| Largest diff. peak/hole / e Å <sup>-3</sup> | 0.25/-0.23                                                    |

## 9. Mechanistic investigations

### 9.1 H/D exchange experiment with 2-aminopyrimidine **1a** using CD<sub>3</sub>COOD

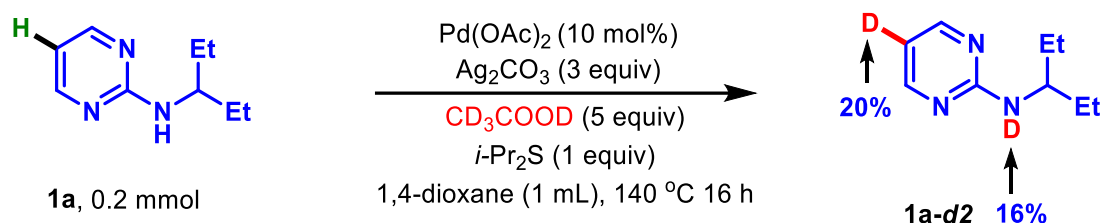

An oven-dried screw cap reaction tube was charged with a magnetic stir-bar, 2-aminopyrimidine **1a** (0.2 mmol, 1.0 equiv), Pd(OAc)<sub>2</sub> (10 mol%, 0.02 mmol, 4.6 mg) and Ag<sub>2</sub>CO<sub>3</sub> (0.6 mmol, 3 equiv, 165 mg) were taken in air. Subsequently, 1,4-dioxane (1.0 mL), isopropyl sulfide (0.1 mmol, 1 equiv, 15  $\mu$ L), and CD<sub>3</sub>COOD (5 equiv) were added. The reaction tube was capped tightly and placed in a preheated oil bath at 140 °C for 12 hours. Upon completion, the resulting mixture was diluted with EtOAc, filtered through a plug of Celite, and concentrated under reduced pressure. The starting material was recovered by column chromatography over silica gel using a mixture of EtOAc/*n*-hexane as eluent to afford **1a-d2**. The amount of D-exchange was measured using <sup>1</sup>H NMR. The D-exchange was found to be 20% at the C5-position, and 15% D-exchange was found at NH proton of pyrimidine.

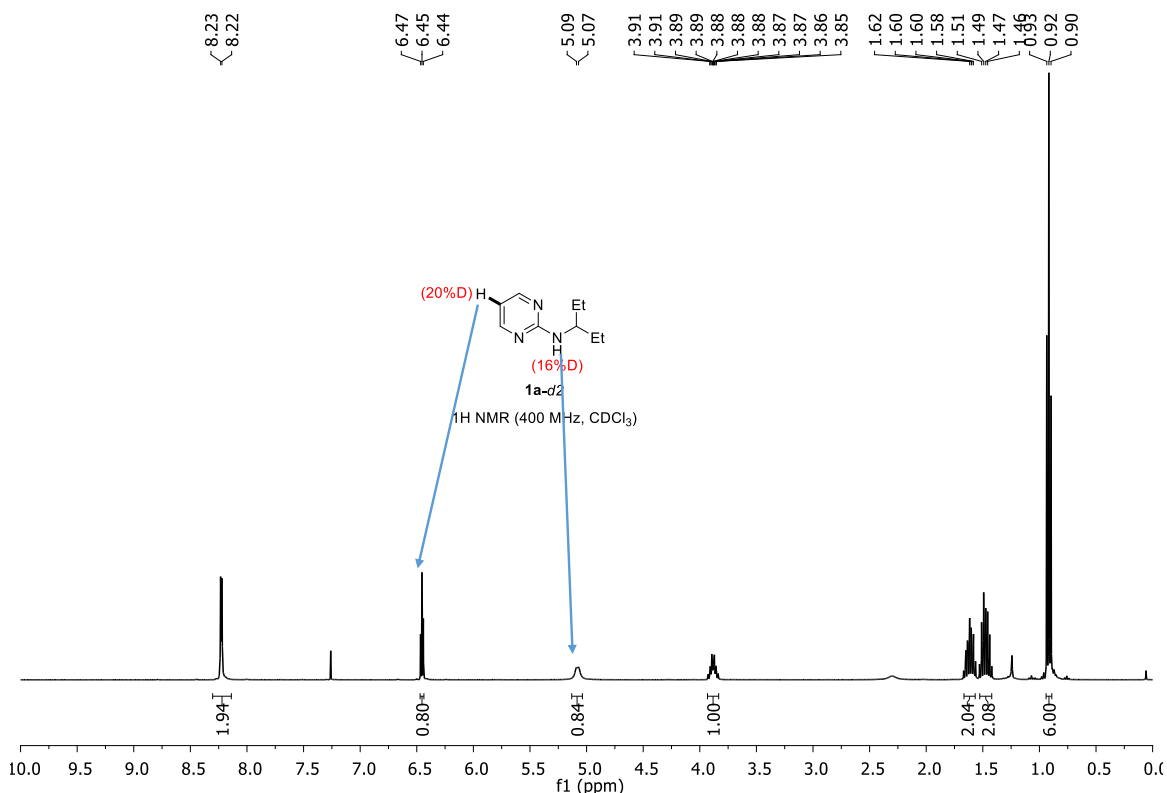

**Figure S3:** <sup>1</sup>H spectrum of **1a-d2** (400 MHz, CDCl<sub>3</sub>)

## 9.2 Kinetic isotope effect Experiments

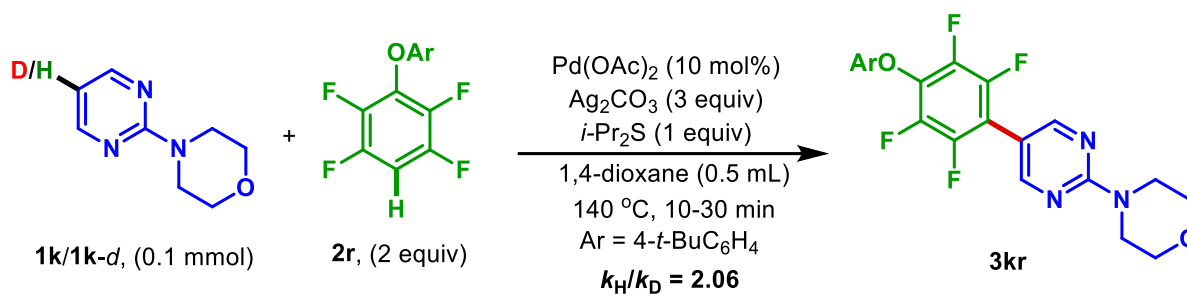

Two oven-dried 15 mL sealed tubes were added Pd(OAc)<sub>2</sub> (10 mol%) and Ag<sub>2</sub>CO<sub>3</sub> (0.3 mmol). In one tube, **1k** (0.1 mmol), **2r** (2 equiv), isopropyl sulfide (0.1 mmol, 1 equiv), and 1,4-dioxane (0.5 mL) were added subsequently. In the other tube, **1k-d** (0.1 mmol), **2r** (2 equiv), isopropyl sulfide (0.1 mmol, 1 equiv) and 1,4-dioxane (0.5 mL) were added. Then, the reaction tubes were capped tightly and stirred at 140 °C. After a respective time, the reactions were stopped and charged with 1,3,5-trimethoxybenzene (0.1 mmol) as an internal standard. Then, the resulting mixture was diluted with EtOAc, filtered through a plug of celite, and concentrated under reduced pressure. The <sup>1</sup>H NMR of the crude samples was recorded to measure the NMR yields. This experiment was performed for three different time intervals. The yield (%) vs time (min) plot was found to be a linear plot, and from the slope of such plots, the KIE value  $k_H/k_D = 2.06$  was determined.

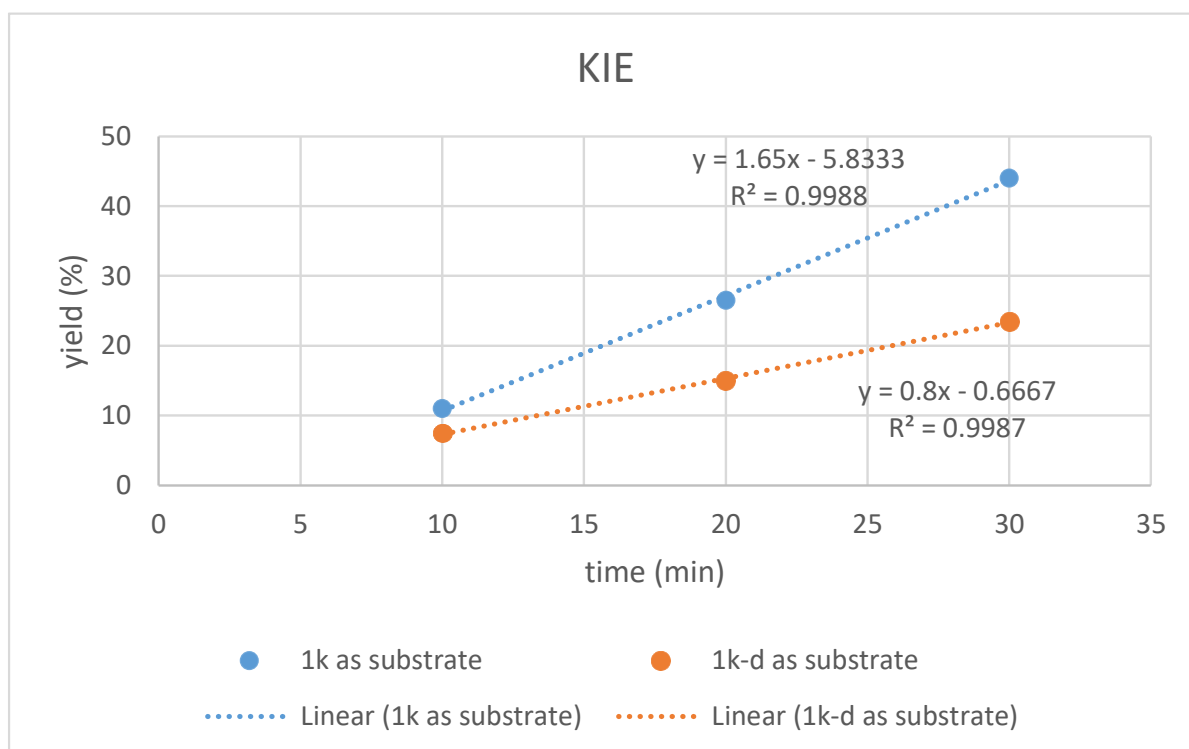

**Figure S3:** Measurement of KIE for substrate **1k** and **1k-d**

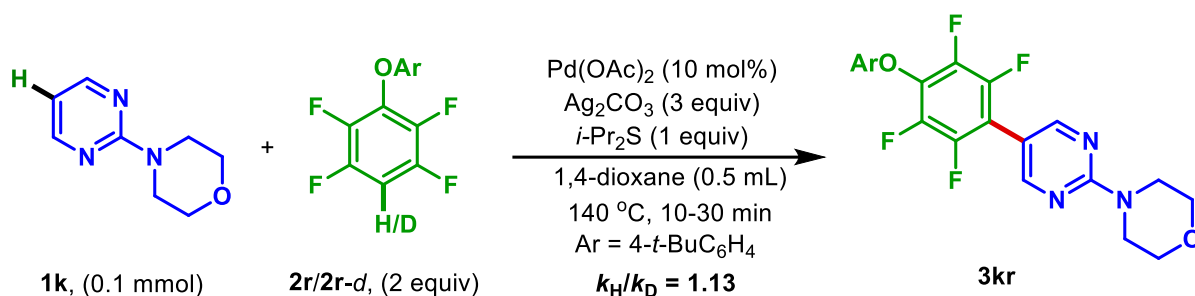

Two oven-dried 15 mL sealed tubes were added Pd(OAc)<sub>2</sub> (10 mol%) and Ag<sub>2</sub>CO<sub>3</sub> (0.3 mmol). In one tube, **1k** (0.1 mmol), **2r** (2 equiv), isopropyl sulfide (0.1 mmol, 1 equiv), and 1,4-dioxane (0.5 mL) were added subsequently. In the other tube, **1k** (0.1 mmol), **2r-d** (2 equiv), isopropyl sulfide (0.1 mmol, 1 equiv) and 1,4-dioxane (0.5 mL) were added. Then, the reaction tubes were capped tightly and stirred at 140 °C. After a respective time, the reactions were stopped and charged with 1,3,5-trimethoxybenzene (0.1 mmol) as an internal standard. Then, the resulting mixture was diluted with EtOAc, filtered through a plug of celite, and concentrated under reduced pressure. The <sup>1</sup>H NMR of the crude samples was recorded to measure the NMR yields. This experiment was performed for three different time intervals. The yield (%) vs time (min) plot was found to be a linear plot, and from the slope of such plots, the KIE value  $k_H/k_D = 1.13$  was determined.

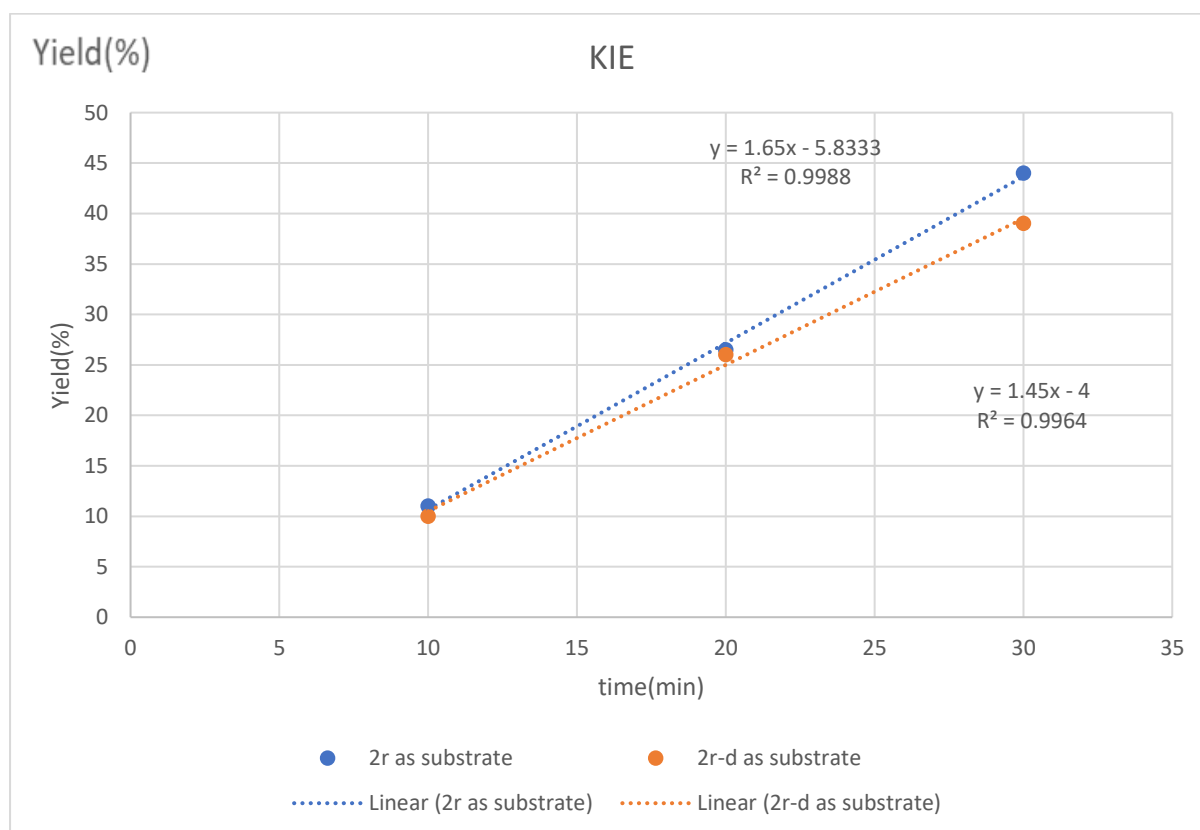

**Figure S4:** Measurement of KIE for substrate **2r** and **2r-d**

### 9.3 H/D exchange experiments with N-phenylpyrimidin-2-amine **1'a** using D<sub>2</sub>O

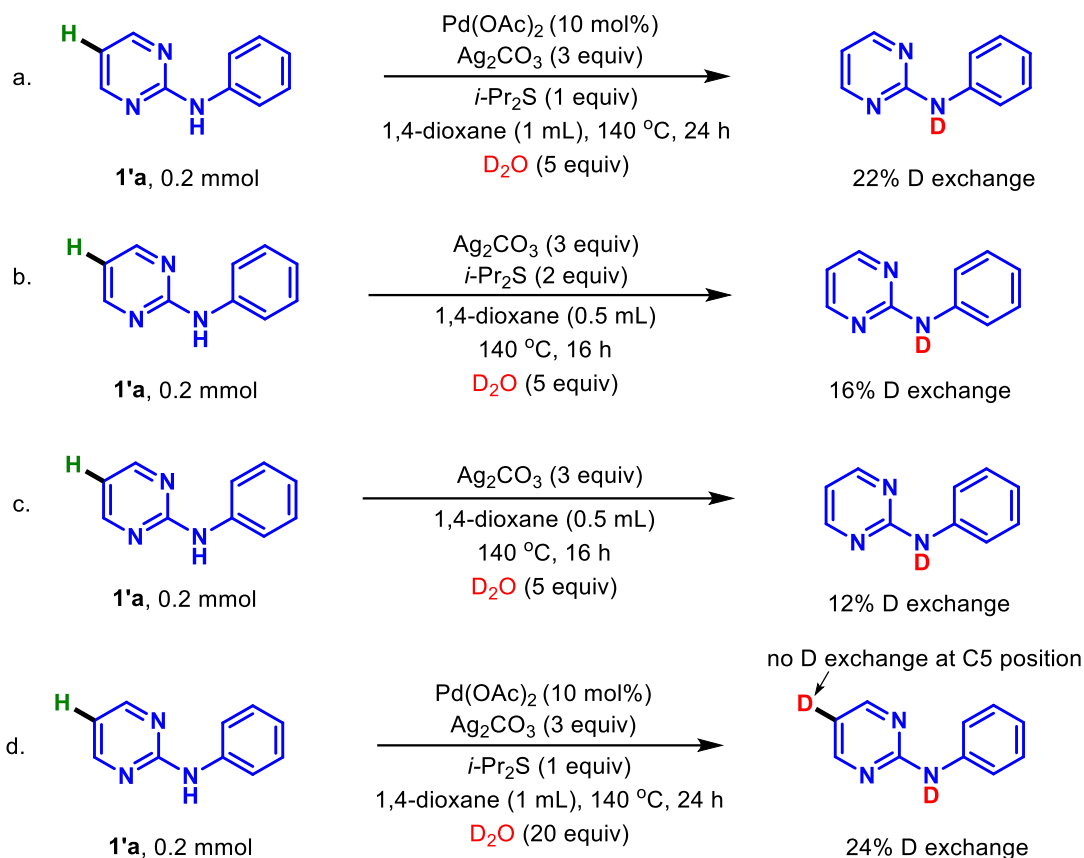

An oven-dried screw cap reaction tube was charged with a magnetic stir-bar, N-phenylpyrimidin-2-amine **1'a** (0.2 mmol, 1.0 equiv) and other reagents were taken in air. Subsequently, 1,4-dioxane (1.0 mL) and D<sub>2</sub>O (5 equiv) were added. The reaction tube was capped tightly and placed on a preheated oil bath at 140 °C for 24 hours. Upon completion, the resulting mixture was diluted with EtOAc, filtered through a plug of Celite, and concentrated under reduced pressure. The starting material was recovered by column chromatography over silica gel using a mixture of EtOAc/n-hexane as eluent to afford **1'a-d**. The amount of D-exchange was measured using <sup>1</sup>H NMR. The D-exchange was found to be 22%, 16%, 12% and 24 % at the NH position under four different conditions, and no D-exchange was found at the C5-position of pyrimidine or at the ortho position of aniline.



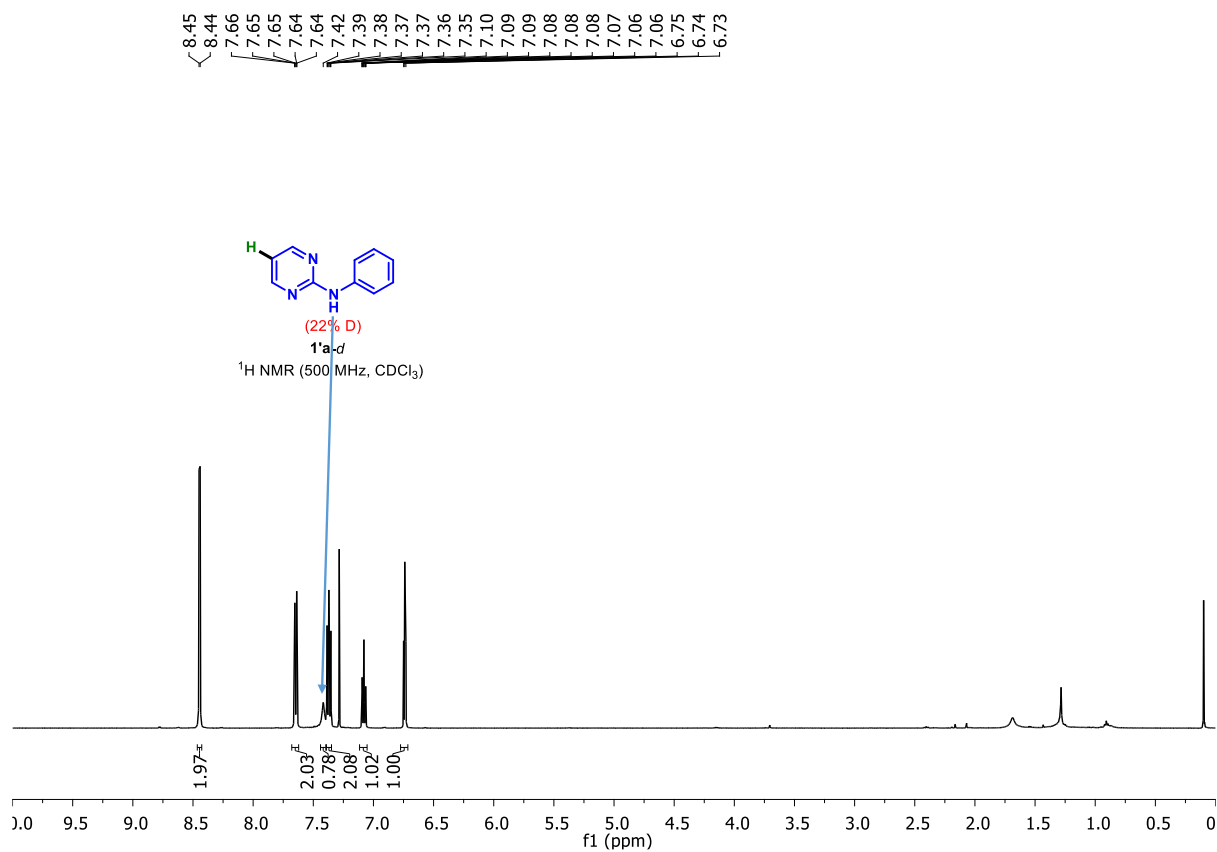

Figure S5: <sup>1</sup>H spectrum of 1'a-d<sub>2</sub> (500 MHz, CDCl<sub>3</sub>) for equation 9.3a

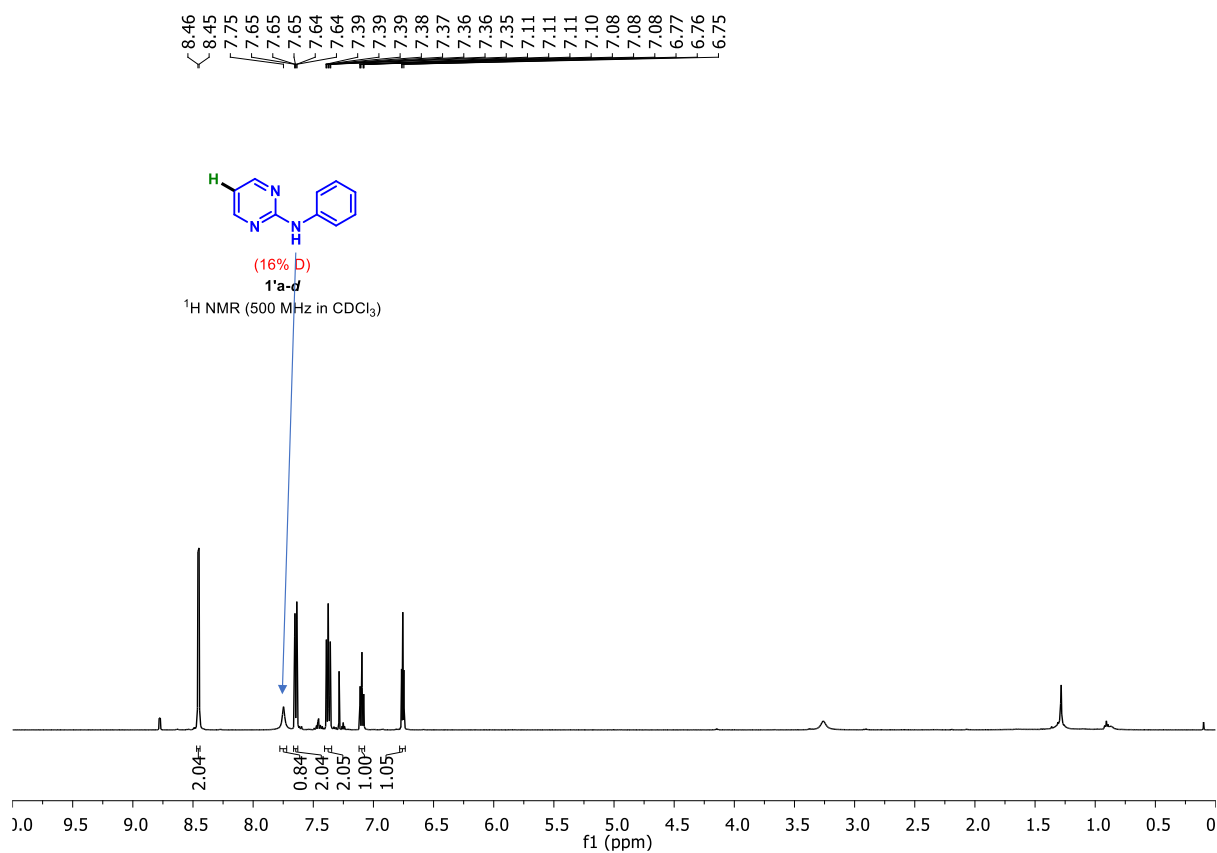

Figure S6: <sup>1</sup>H spectrum of 1'a-d<sub>2</sub> (500 MHz, CDCl<sub>3</sub>) for equation 9.3b

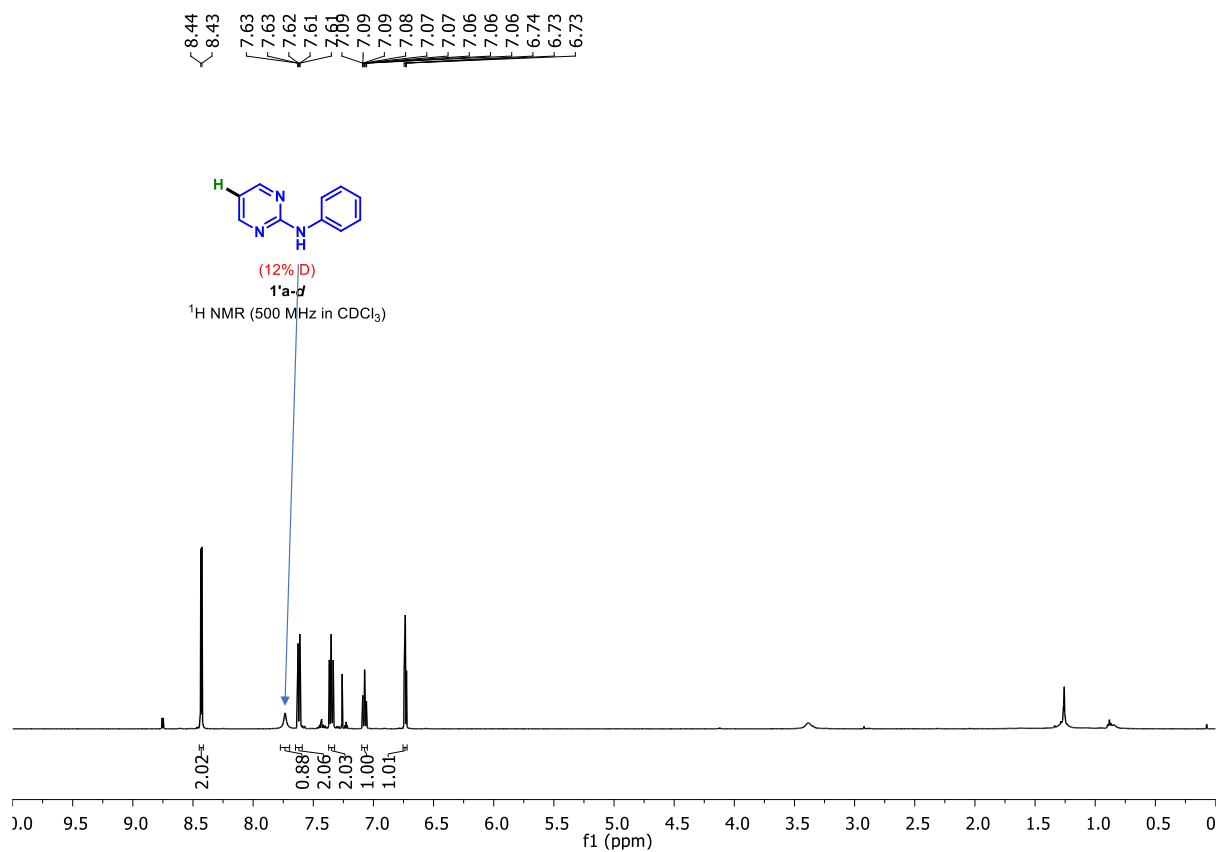

**Figure S7:** <sup>1</sup>H spectrum of **1'a-d2** (500 MHz, CDCl<sub>3</sub>) for equation 9.3c

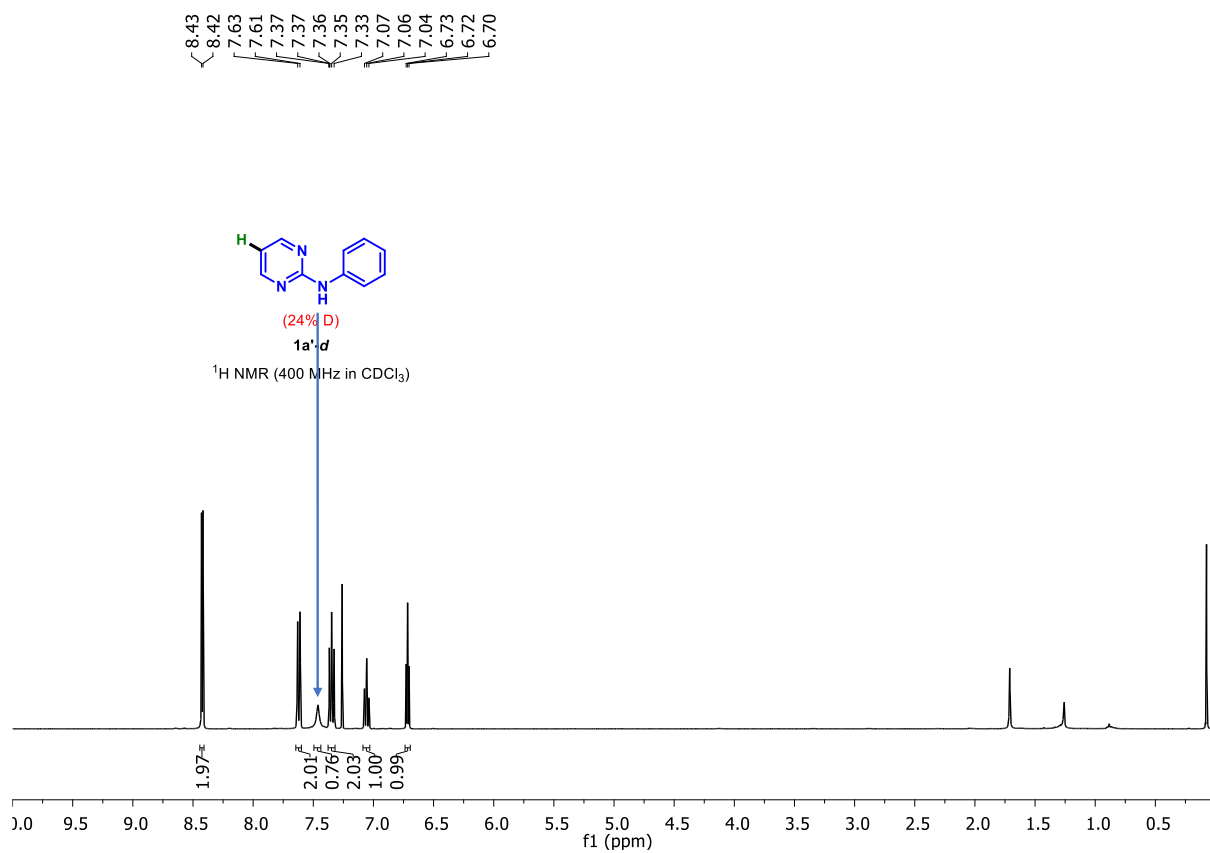

**Figure S8:** <sup>1</sup>H spectrum of **1'a-d2** (400 MHz, CDCl<sub>3</sub>) for equation 9.3d

#### 9.4 Control experiment with Pd(OAc)<sub>2</sub>(*i*-Pr<sub>2</sub>S)<sub>2</sub>

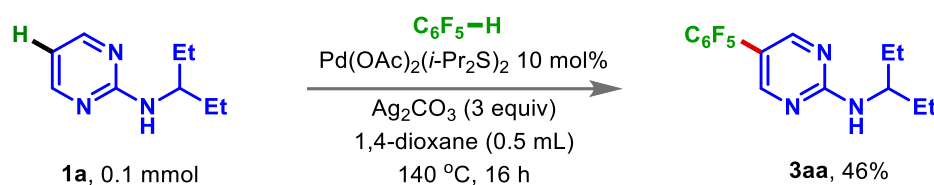

An oven-dried screw cap reaction tube was charged with a magnetic stir-bar, N-phenylpyrimidin-2-amine **1a** (0.1 mmol, 1.0 equiv), Pd(OAc)<sub>2</sub>(*i*-Pr<sub>2</sub>S)<sub>2</sub> (10 mol%, 0.01 mmol, 4.6 mg) and Ag<sub>2</sub>CO<sub>3</sub> (0.3 mmol, 3 equiv, 82 mg) were taken in air. Subsequently, pentafluorobenzene (0.2 mmol, 2.0 equiv) and 1,4-dioxane (0.5 mL) were added. The reaction tube was capped tightly and placed in a preheated oil bath at 140 °C for 16 hours. Upon completion, the resulting mixture was diluted with EtOAc, filtered through a plug of Celite, and concentrated under reduced pressure. Product **3aa** was isolated in 46% yield by column chromatography over silica gel using a mixture of EtOAc/*n*-hexane as eluent. It suggested that the (*i*-Pr<sub>2</sub>S)<sub>2</sub>Pd(OAc)<sub>2</sub> could likely be involved in the catalytic cycle.

#### 9.5 Control experiment with **1'1**, **5a** and **5b**

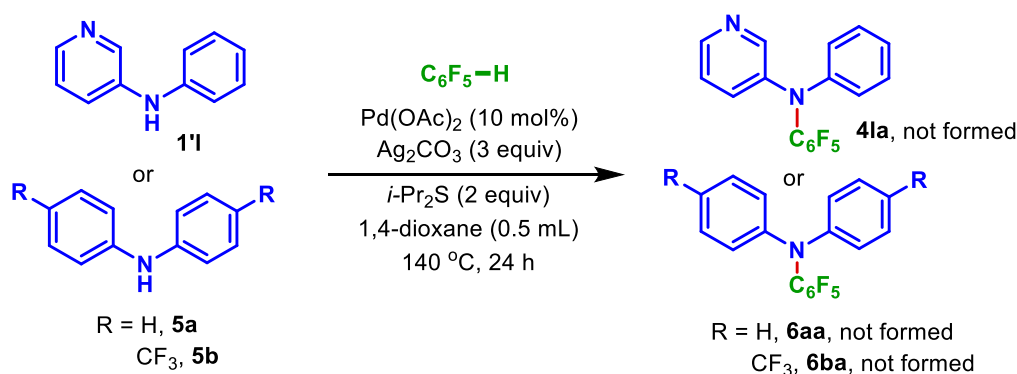

Three oven-dried 15 mL sealed tubes were added **1'1**, **5a**, and **5b** separately. Following this, Pd(OAc)<sub>2</sub> (10 mol%), Ag<sub>2</sub>CO<sub>3</sub> (0.3 mmol, 3 equiv), isopropyl sulfide (0.1 mmol, 1 equiv), pentafluorobenzene (0.2 mmol, 2 equiv) and 1,4-dioxane (0.5 mL) were added subsequently to each tube. Then, the reaction tubes were capped tightly and stirred at 140 °C for 24 hours. After a respective time, the reactions were stopped, and the resulting mixture was diluted with EtOAc. The TLC and GC analysis showed that **41a**, **6aa**, and **6ba** were not formed. Filtered through a plug of celite and concentrated under reduced pressure. These experiments suggested that (1) N-chelation is crucial, for which the position of the nitrogen atom is vital, and (2) the N-H polyfluoroarylation is not guided by electronics.

#### 9.6 Equilibrium study with **1a** and Pd(OAc)<sub>2</sub>

An equilibrium study was performed by conducting a stoichiometric reaction of N-(pentan-3-yl)pyrimidin-2-amine **1a** (1 equiv) in the presence of Pd(OAc)<sub>2</sub> (1 equiv) at room temperature in DMSO-d<sub>6</sub> in an NMR tube. We have found that the pyrimidyl C4-, and C6-protons degeneracy was broken as 1 equivalent of Pd(OAc)<sub>2</sub> was mixed with **1a**. It might due to the

coordination of the palladium center to one of the nitrogen atoms and formation of a species

### 1a.Pd.

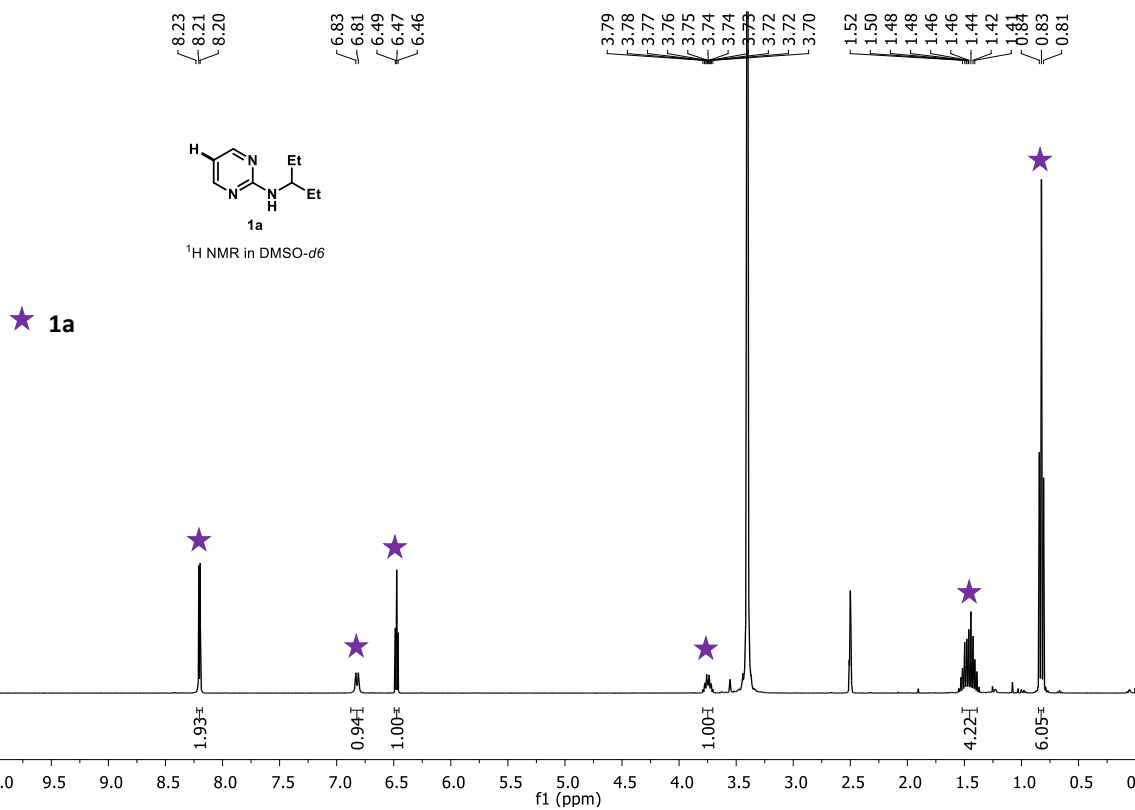

Figure S9: <sup>1</sup>H spectrum of **1a** (400 MHz, DMSO-*d*<sub>6</sub>)

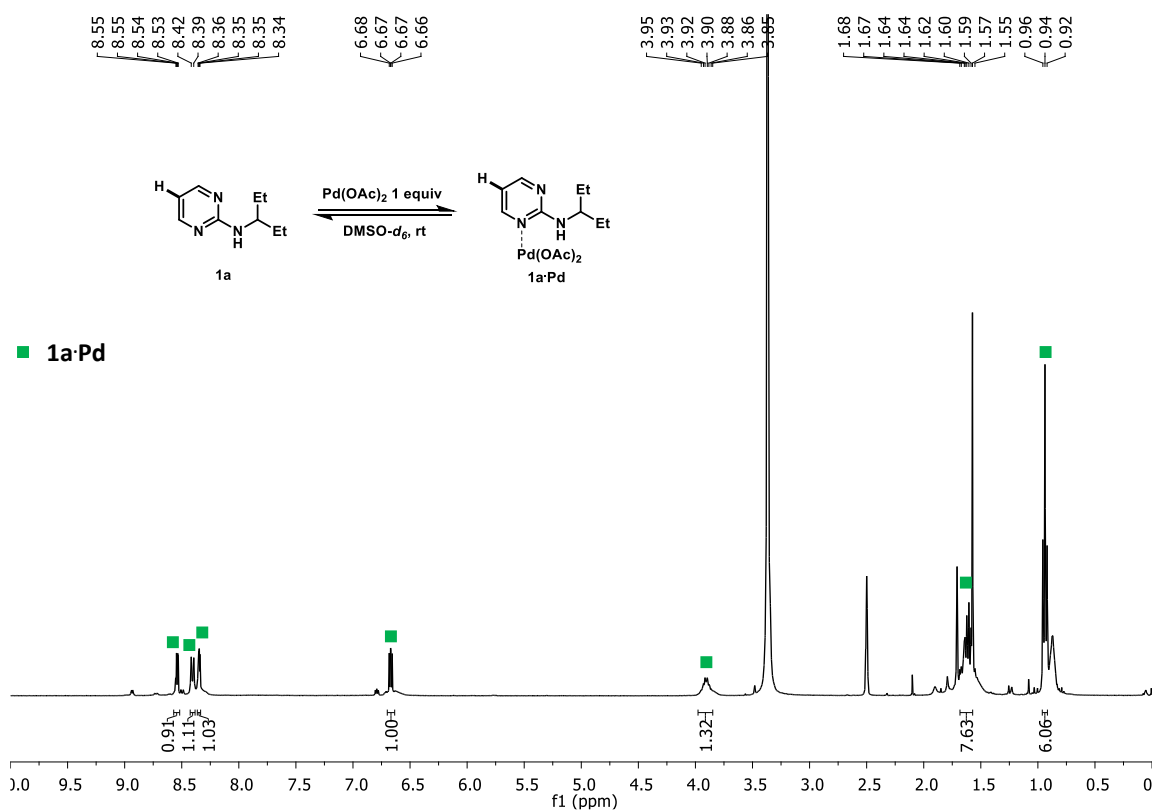

Figure S10: <sup>1</sup>H spectrum of **1a** + Pd(OAc)<sub>2</sub> (400 MHz, DMSO-*d*<sub>6</sub>)

## 10. Proposed mechanism

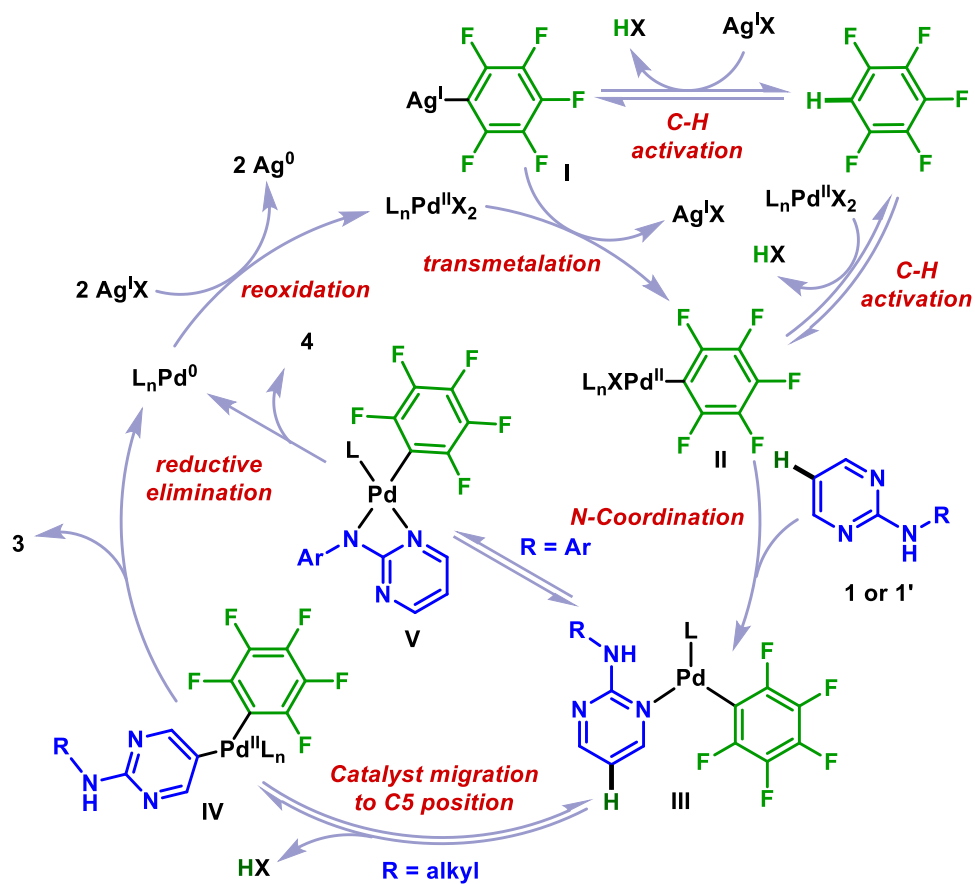

**Figure S11:** Proposed mechanism for C5- and N-polyfluoroarylation of 2-aminopyrimidines

## 11. References

1. A. T. N and A. V. Adhikari, *New J. Chem.*, 2014, **38**, 5018-5029.
2. A. Das and B. Maji, *Chem. Eur. J.*, 2023, **29**, e202301436.
3. A. Jati, K. Dey, M. Nurhuda, M. A. Addicoat, R. Banerjee and B. Maji, *J. Am. Chem. Soc.*, 2022, **144**, 7822-7833.
4. K. Walsh, H. F. Sneddon and C. J. Moody, *ChemSusChem*, 2013, **6**, 1455-1460.
5. A. Das, A. Jana and B. Maji, *Chem. Commun.*, 2020, **56**, 4284-4287.
6. C. Brahm, P. Tholen, W. Saak and S. Doye, *Eur. J. Org. Chem.*, 2013, **2013**, 7583-7592.
7. F. Li, L. Chen, Q. Kang, J. Cai and G. Zhu, *New J. Chem.*, 2013, **37**, 624-631.
8. H. P. L. Steenackers, D. S. Ermolat'ev, B. Savaliya, A. De Weerd, D. De Coster, A. Shah, E. V. Van der Eycken, D. E. De Vos, J. Vanderleyden and S. C. J. De Keersmaecker, *J. Med. Chem.*, 2011, **54**, 472-484.
9. S. Huang, S.-P. Wu, Q. Zhou, H.-Z. Cui, X. Hong, Y.-J. Lin and X.-F. Hou, *J. Organomet. Chem.*, 2018, **868**, 14-23.
10. A. S. Hogendorf, A. Hogendorf, R. Kurczab, J. Kalinowska-Tluscik, P. Popik, A. Nikiforuk, M. Krawczyk, G. Satala, T. Lenda, J. Knutelska, R. Bugno, J. Staron, W. Pietrus, M. Matloka, K. Dubiel, R. Moszczyński-Petkowski, J. Pieczykolan, M. Wieczorek, B. Pilarski, P. Zajdel and A. J. Bojarski, *European journal of medicinal chemistry*, 2019, **179**, 1-15.
11. X. Wei, C. Zhang, Y. Wang, Q. Zhan, G. Qiu, L. Fan and G. Yin, *Eur. J. Org. Chem.*, 2019, **2019**, 7142-7150.
12. C. C. C. Johansson Seechurn, S. L. Parisel and T. J. Colacot, *J. Org. Chem.*, 2011, **76**, 7918-7932.
13. Q. Yan, H. Huang, H. Zhang, M.-H. Li, D. Yang, M.-P. Song and J.-L. Niu, *J. Org. Chem.*, 2020, **85**, 11190-11199.
14. Y. Chen, L. Hu, L. Liang, F. Guo, Y. Yang and B. Zhou, *J. Org. Chem.*, 2020, **85**, 2048-2058.
15. K. Das, K. Sarkar and B. Maji, *ACS Catal.*, 2021, **11**, 7060-7069.
16. E. V. Babaev and D. S. Ermolat'ev, *Russ. J. Gen. Chem.*, 2010, **80**, 2572-2589.
17. G. Qian, B. Liu, Q. Tan, S. Zhang and B. Xu, *Eur. J. Org. Chem.*, 2014, **2014**, 4837-4843.
18. X. Huang, S. Xu, Q. Tan, M. Gao, M. Li and B. Xu, *Chem. Commun.*, 2014, **50**, 1465-1468.
19. J. Li, S. Warratz, D. Zell, S. De Sarkar, E. E. Ishikawa and L. Ackermann, *J. Am. Chem. Soc.*, 2015, **137**, 13894-13901.
20. G. G. Pawar, A. Brahmanandan and M. Kapur, *Org. Lett.*, 2016, **18**, 448-451.
21. J. Duan, P. Y. Choy, K. B. Gan and F. Y. Kwong, *Org. Biomol. Chem.*, 2022, **20**, 1883-1887.
22. T.-T. Deng, J. Huang, G. Lian, W.-W. Sun and B. Wu, *Asian J. Org. Chem.*, 2021, **10**, 2880-2882.
23. C. Liu, L. Cao, X. Yin, H. Xu and B. Zhang, *J. Fluor. Chem.*, 2013, **156**, 51-60.
24. J.-H. Zhan, H. Lv, Y. Yu and J.-L. Zhang, *Adv. Synth. Catal.*, 2012, **354**, 1529-1541.
25. C.-Y. He, S. Fan and X. Zhang, *J. Am. Chem. Soc.*, 2010, **132**, 12850-12852.
26. P. Anbarasan, H. Neumann and M. Beller, *Chemistry – An Asian Journal*, 2010, **5**, 1775-1778.
27. I. Stoll, R. Brockhinke, A. Brockhinke, M. Böttcher, T. Koop, H.-G. Stammer, B. Neumann, A. Niemeyer, A. Hütten and J. Mattay, *Chem. Mater.*, 2010, **22**, 4749-4755.

## 12. Copies of NMR spectra

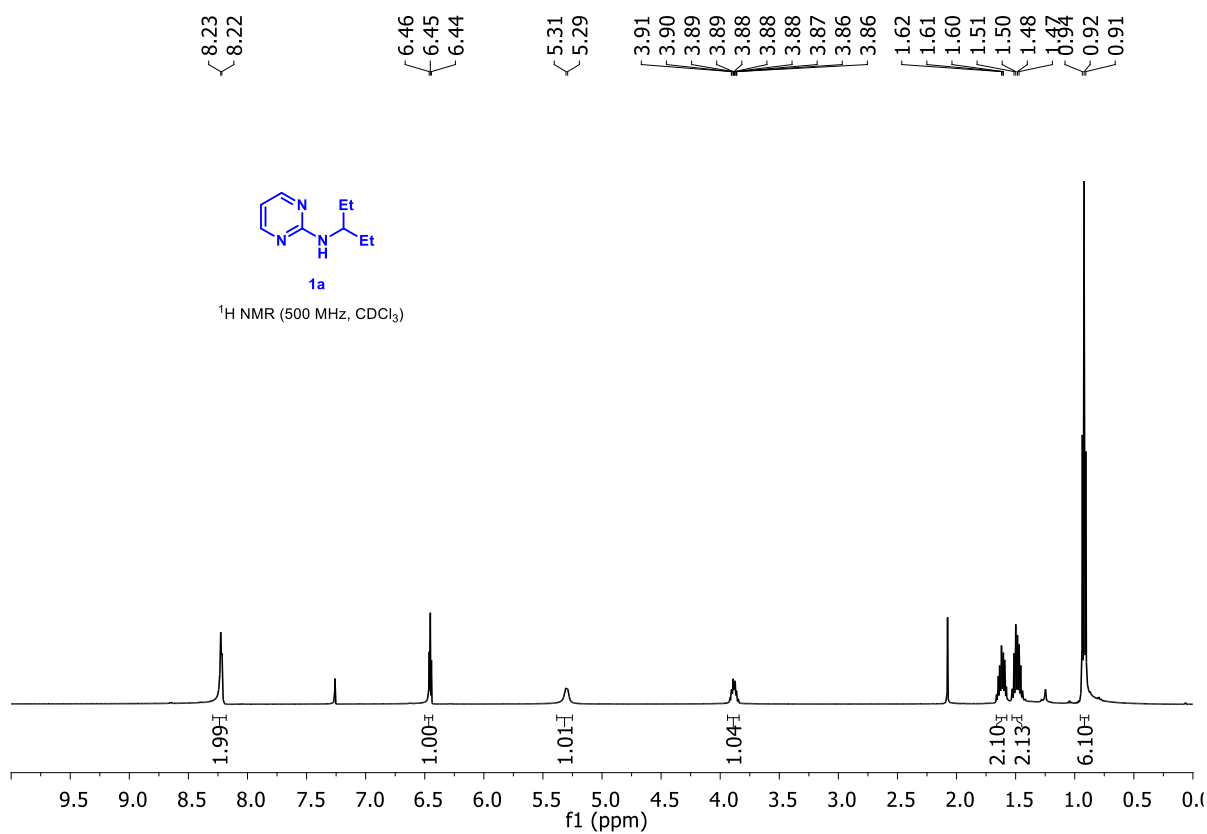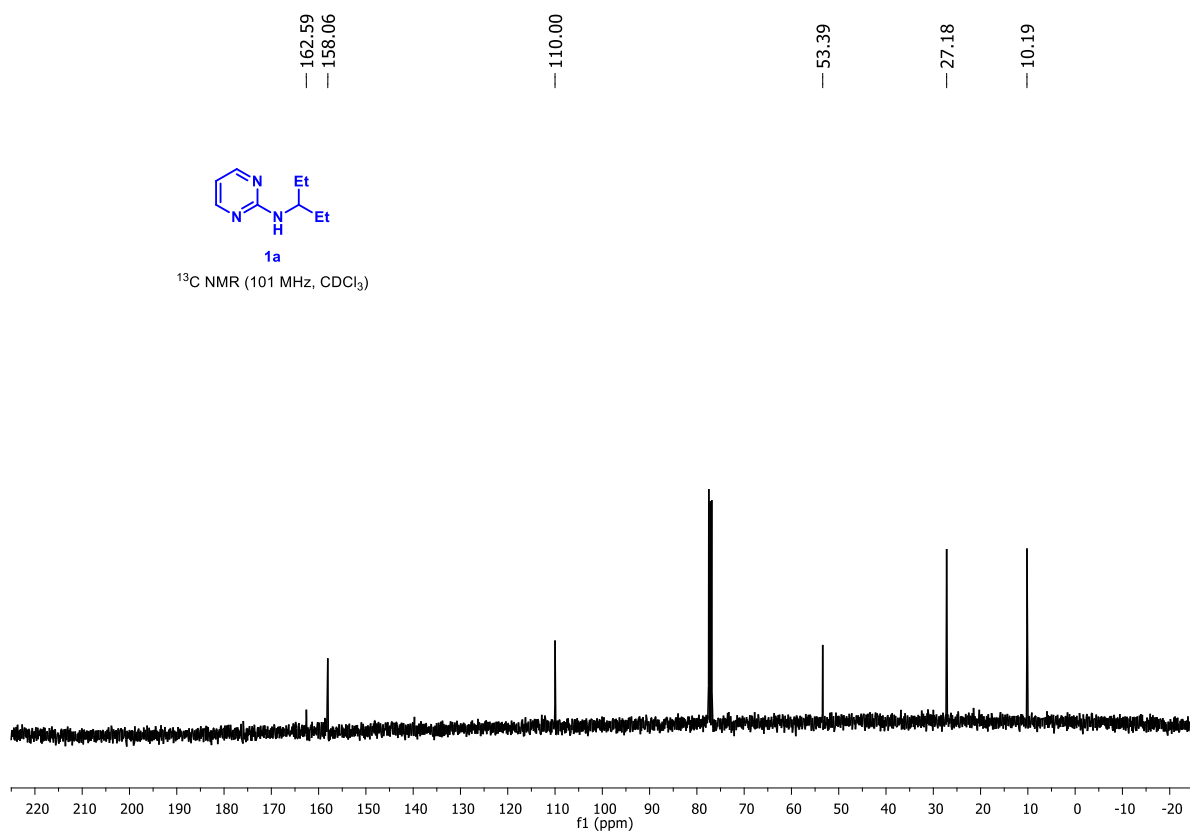

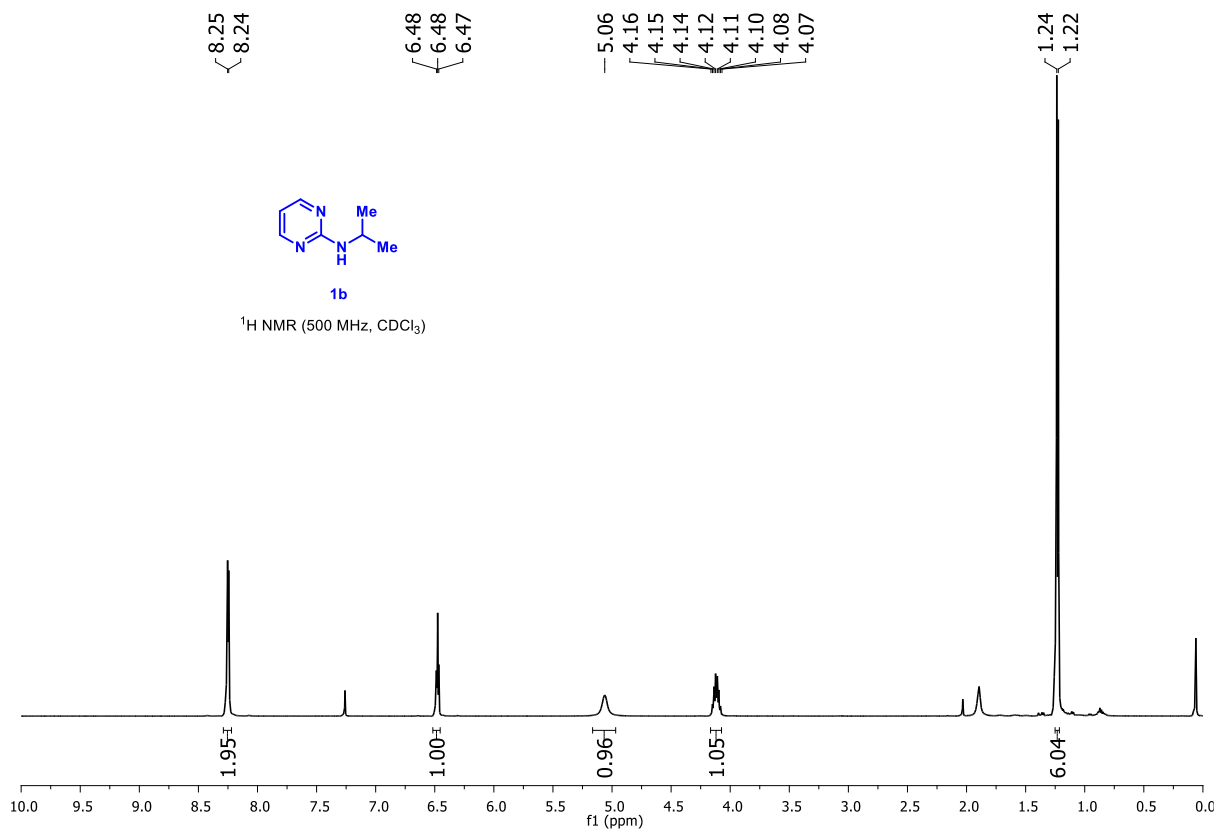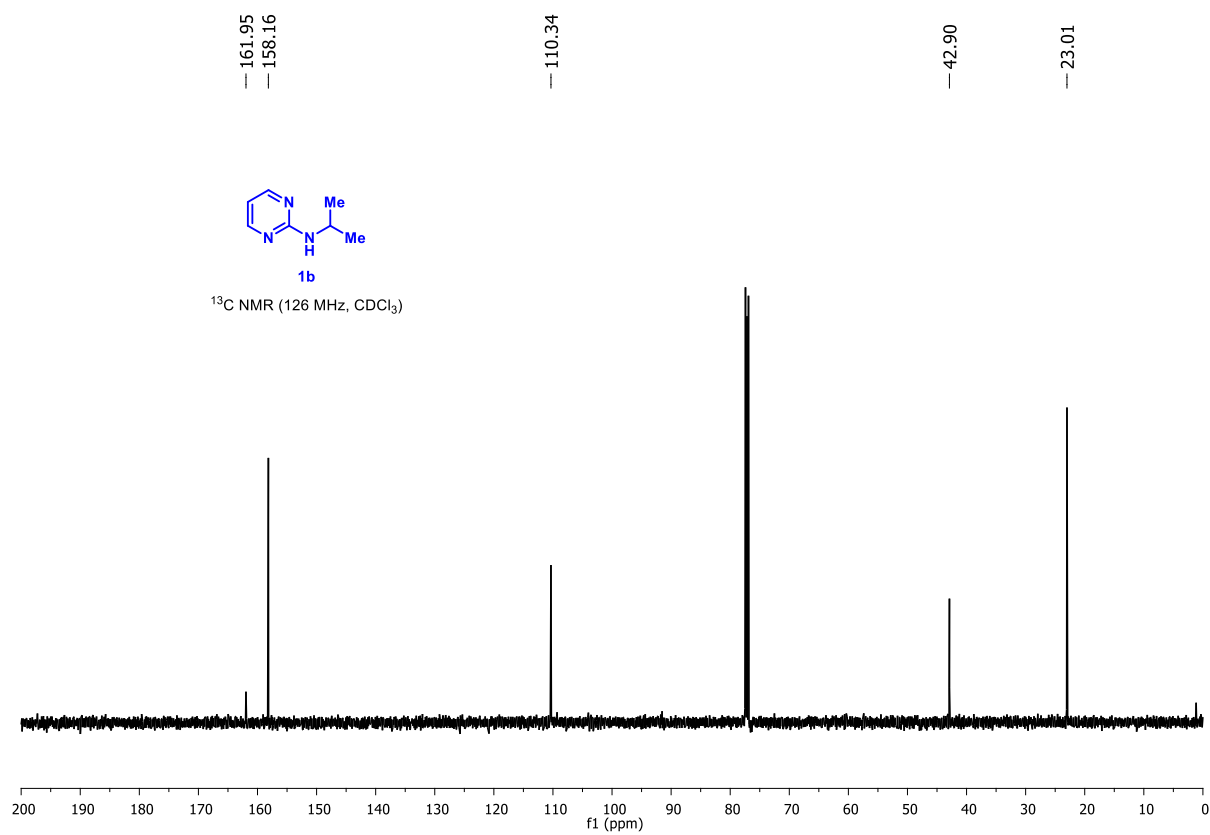



8.23  
8.22  
6.45  
6.44  
6.43  
5.27  
5.26  
3.82  
3.81  
3.80  
3.79  
3.78  
3.78  
3.77  
3.76  
2.03  
2.02  
2.01  
2.00  
2.00  
1.74  
1.73  
1.72  
1.71  
1.70  
1.70  
1.63  
1.62  
1.61  
1.60  
1.60  
1.59  
1.59  
1.43  
1.43  
1.42  
1.41  
1.40  
1.38  
1.36  
1.35  
1.35  
1.23  
1.22  
1.21  
1.18  
1.16  
1.16

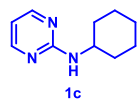

<sup>1</sup>H NMR (500 MHz, CDCl<sub>3</sub>)

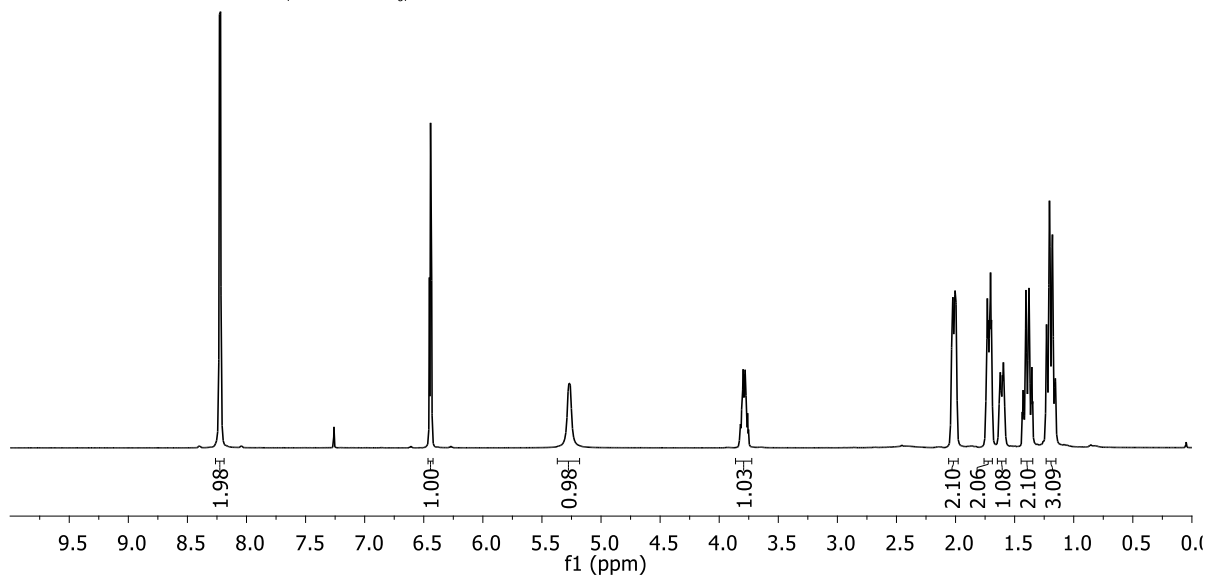

161.95  
158.12

110.19

49.66

33.35

25.86  
24.99

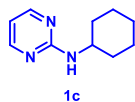

<sup>13</sup>C NMR (126 MHz, CDCl<sub>3</sub>)

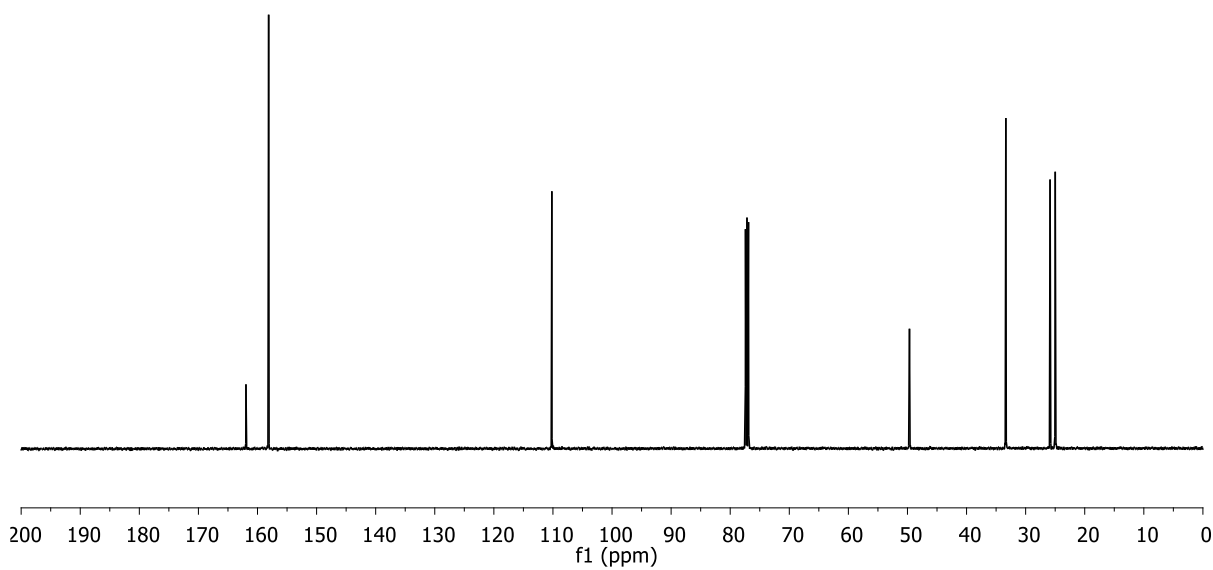

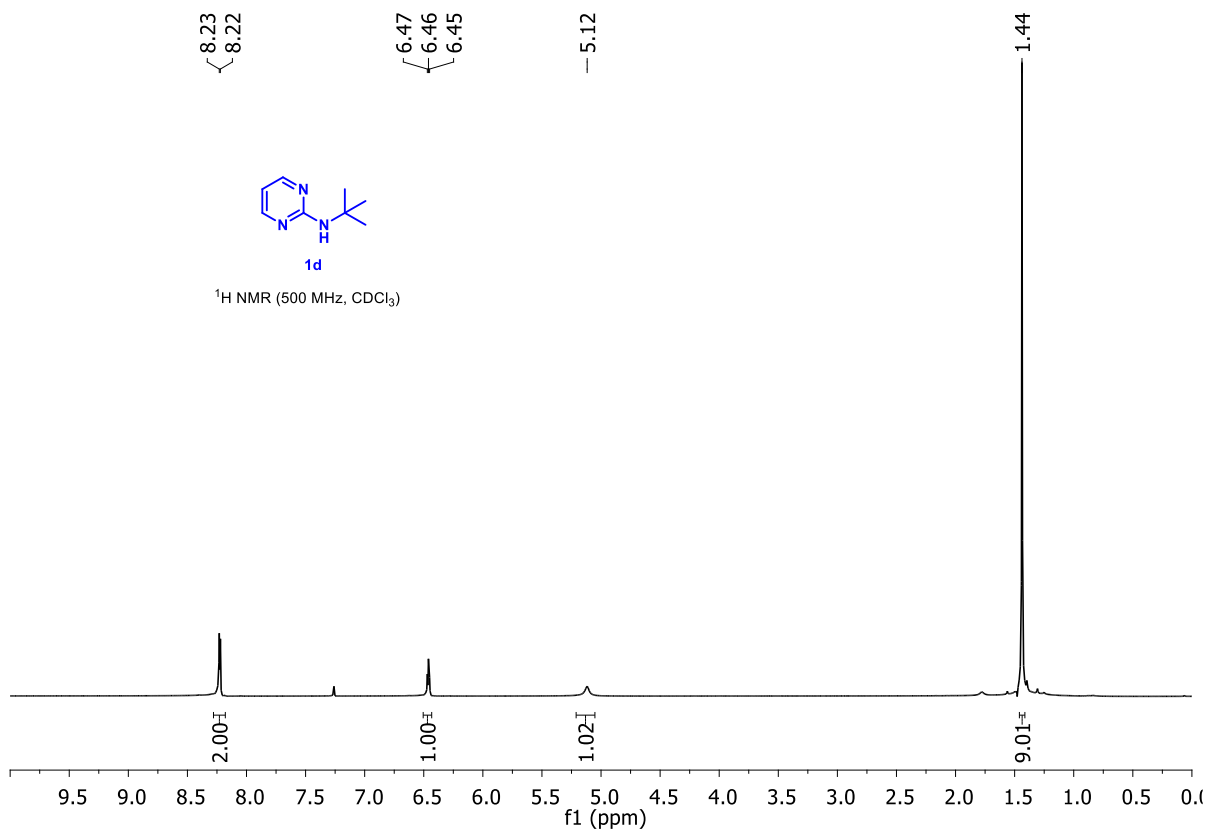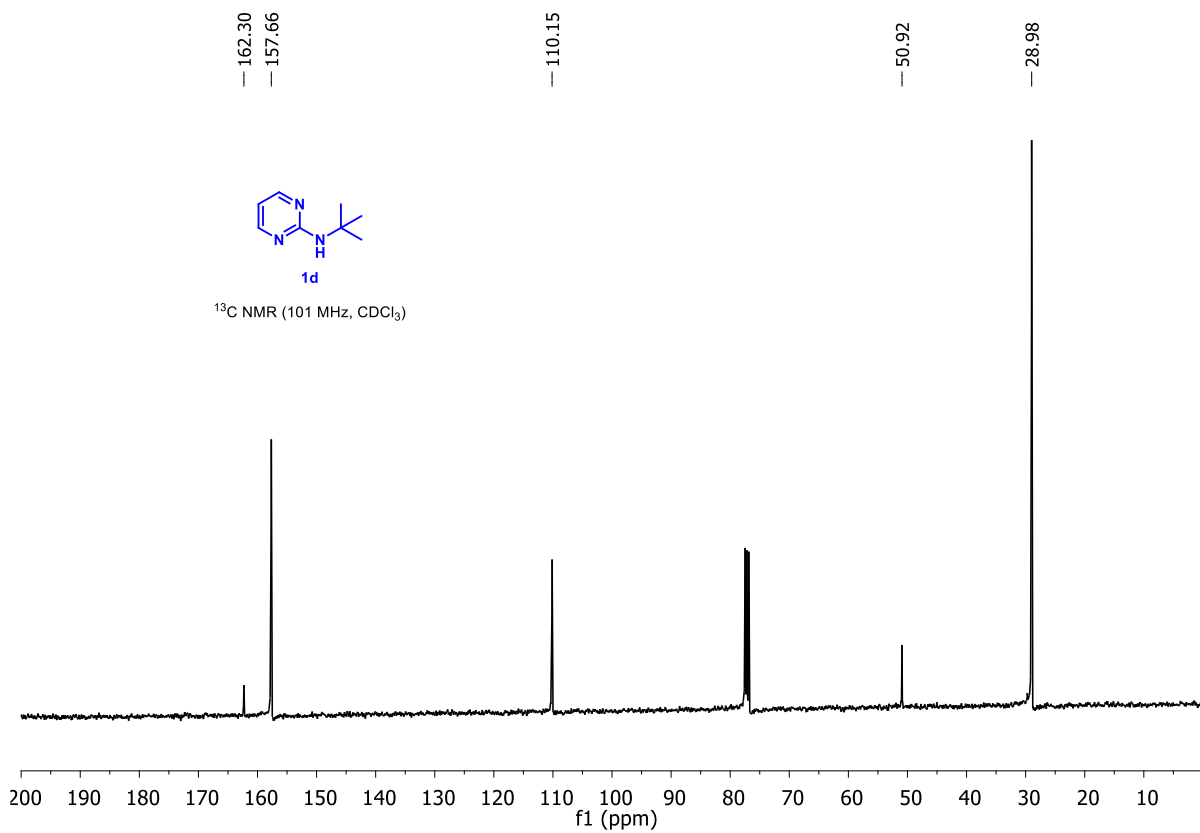

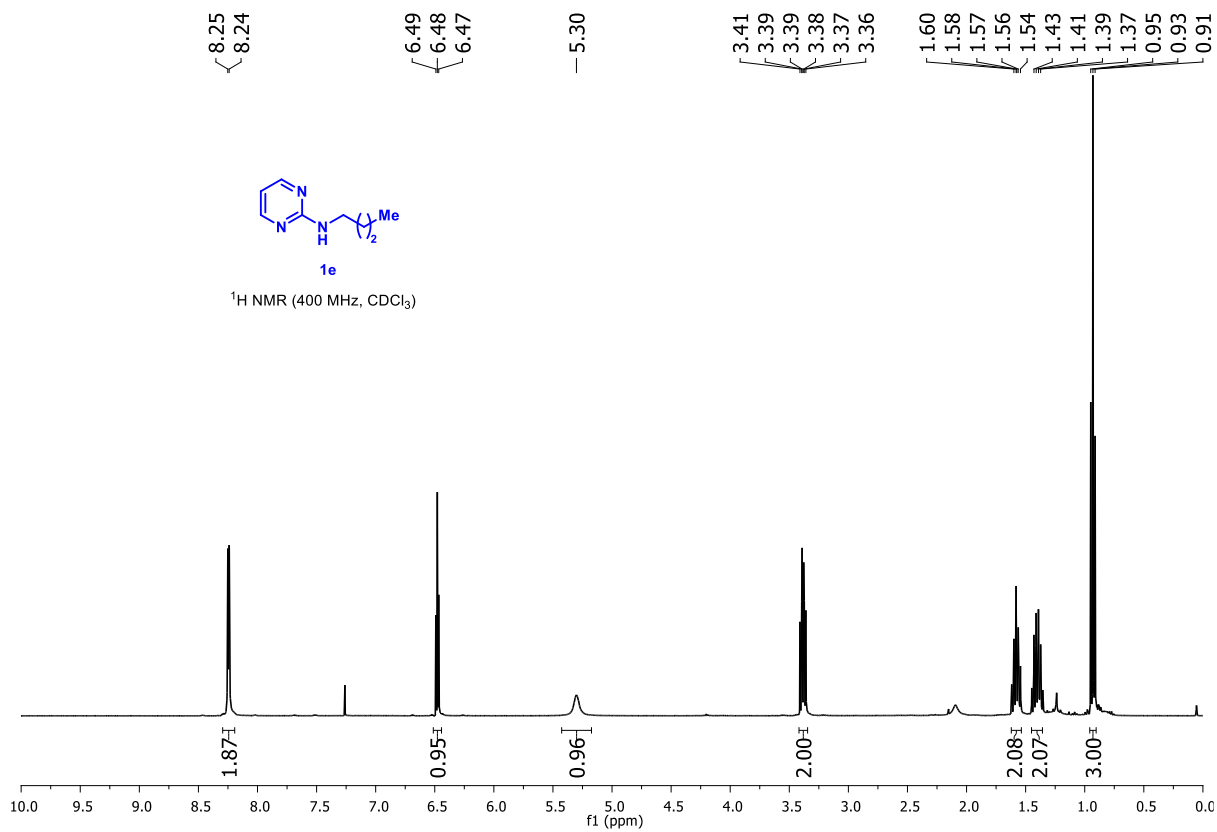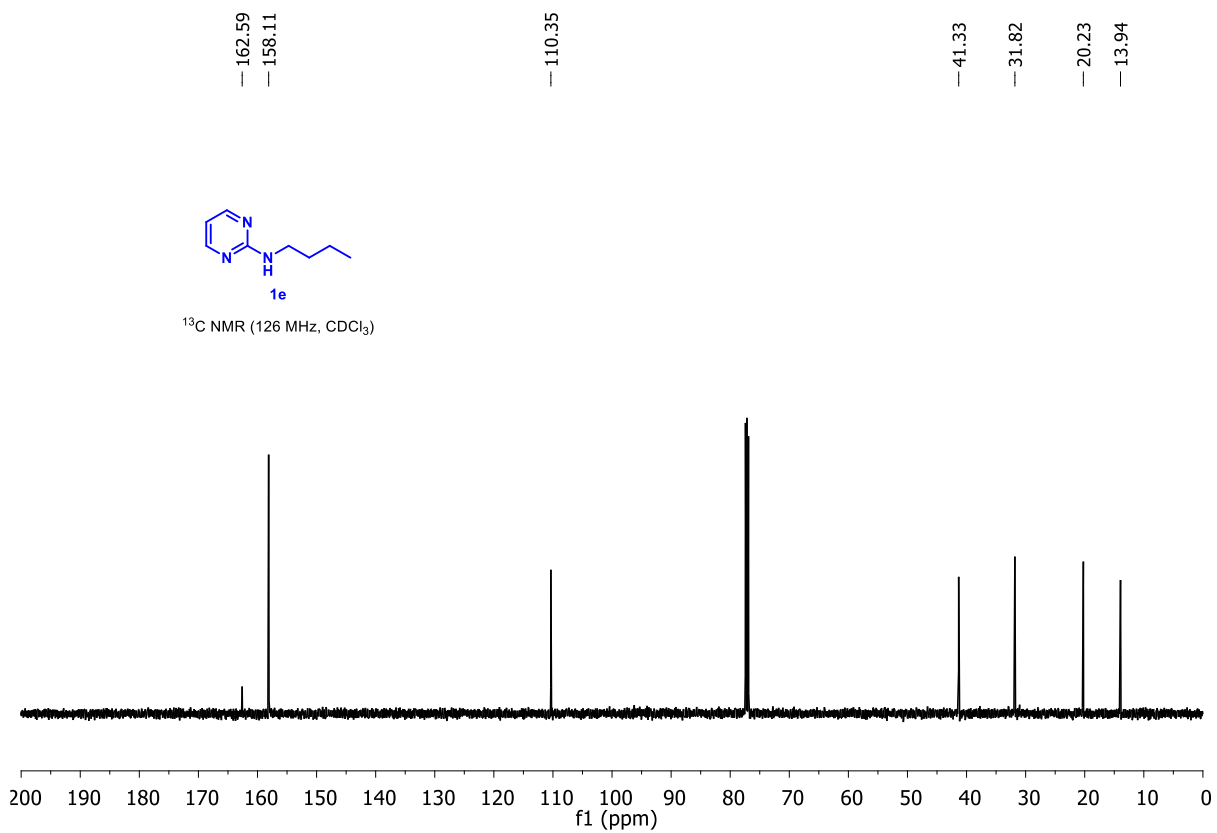

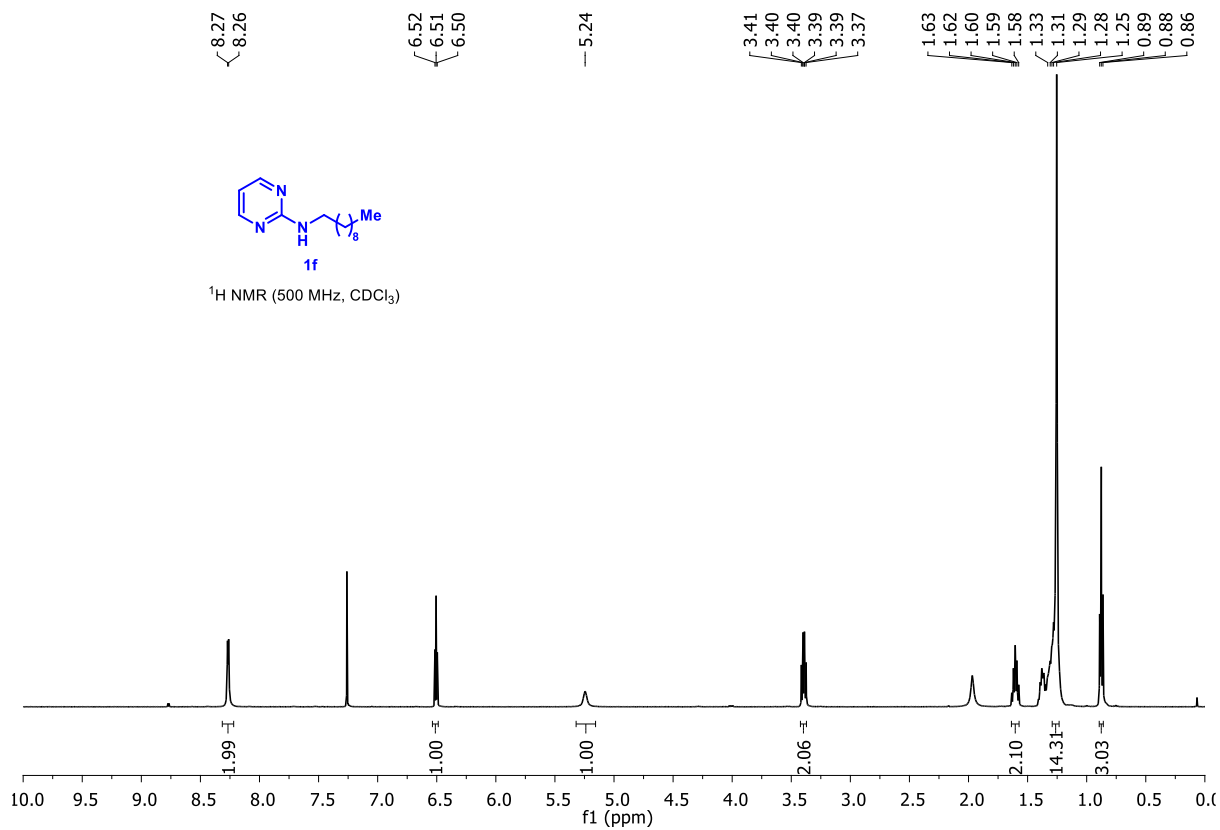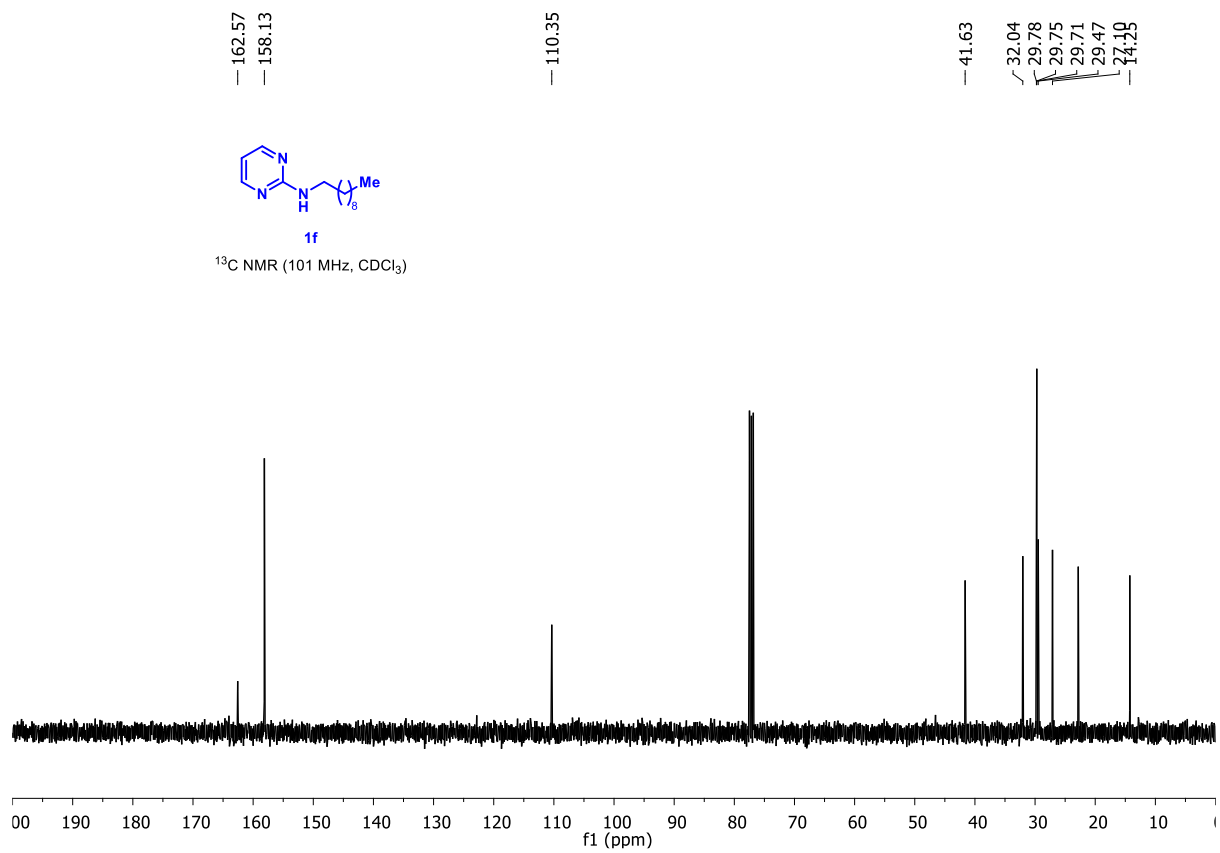

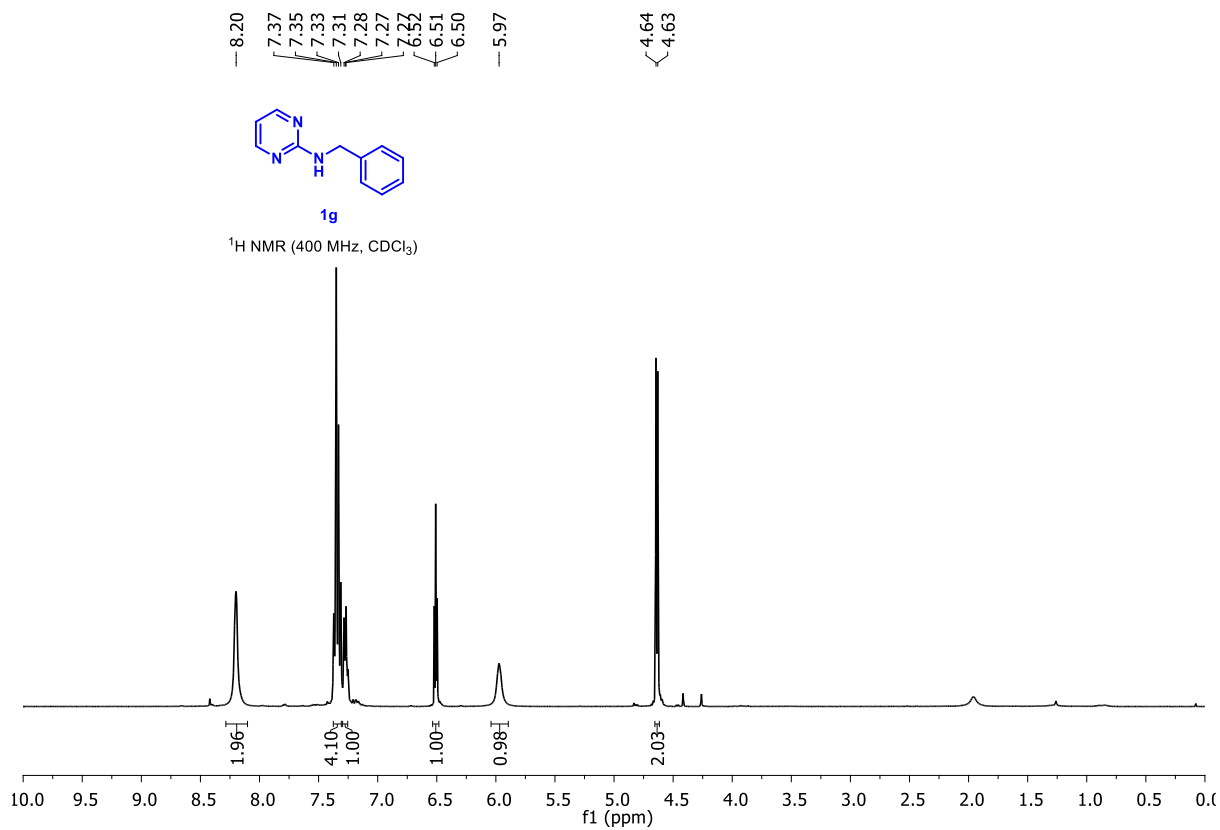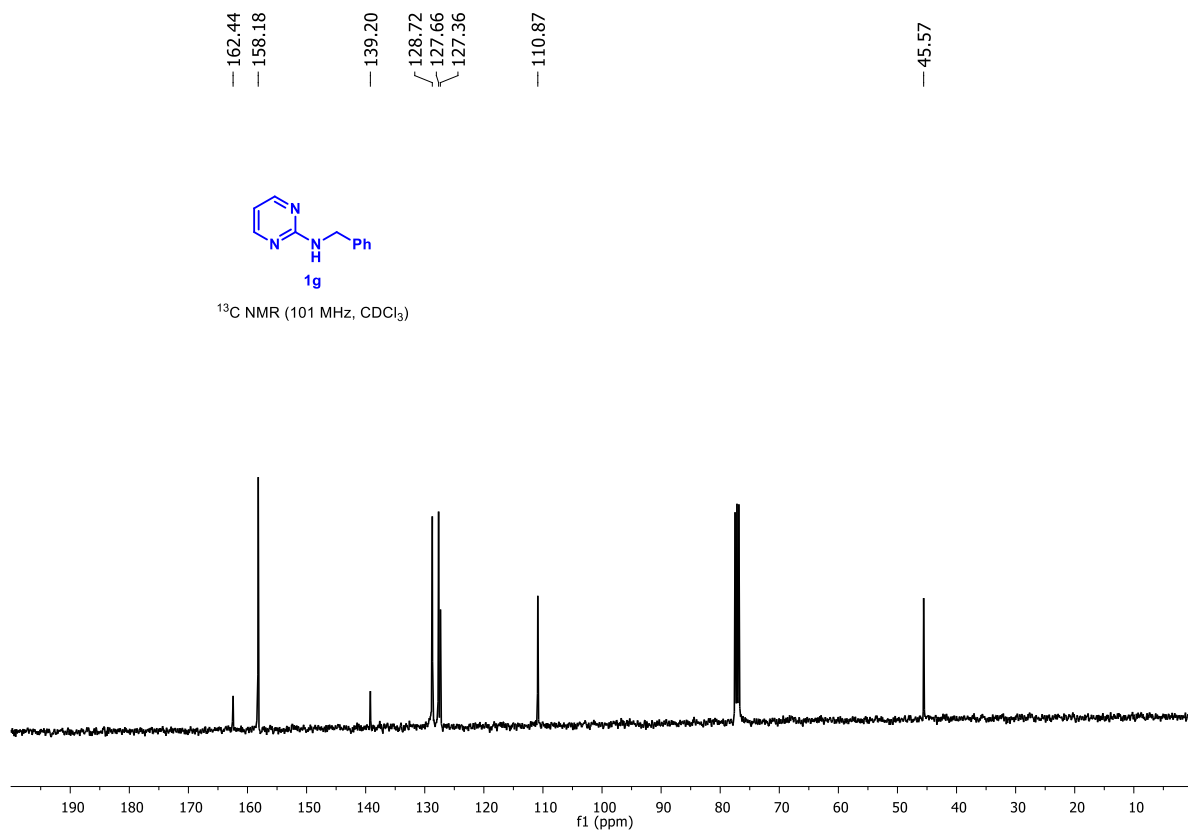

8.27  
8.26  
7.30  
7.29  
7.24  
7.24  
7.22  
6.53  
6.52  
6.51  
-5.18  
3.74  
3.72  
3.70  
3.68  
3.67  
2.94  
2.92  
2.90

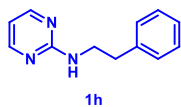

<sup>1</sup>H NMR (400 MHz, CDCl<sub>3</sub>)

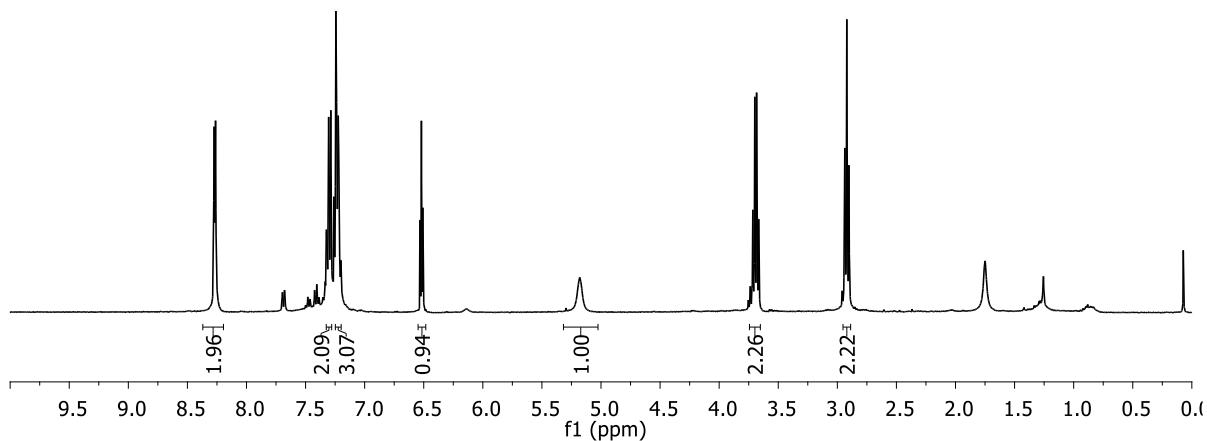

162.41  
158.18  
139.33  
128.98  
128.71  
126.52  
-110.71  
42.74  
35.84

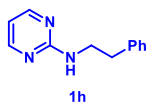

<sup>13</sup>C NMR (101 MHz, CDCl<sub>3</sub>)

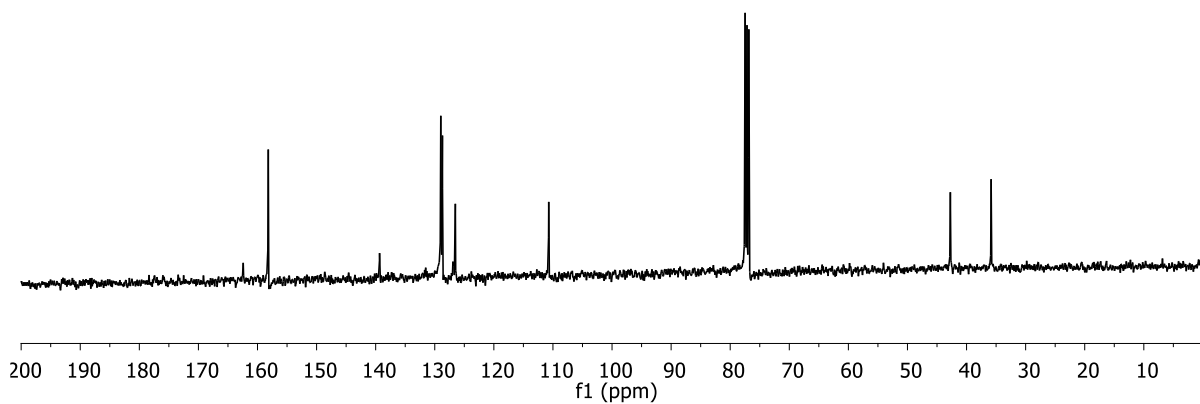

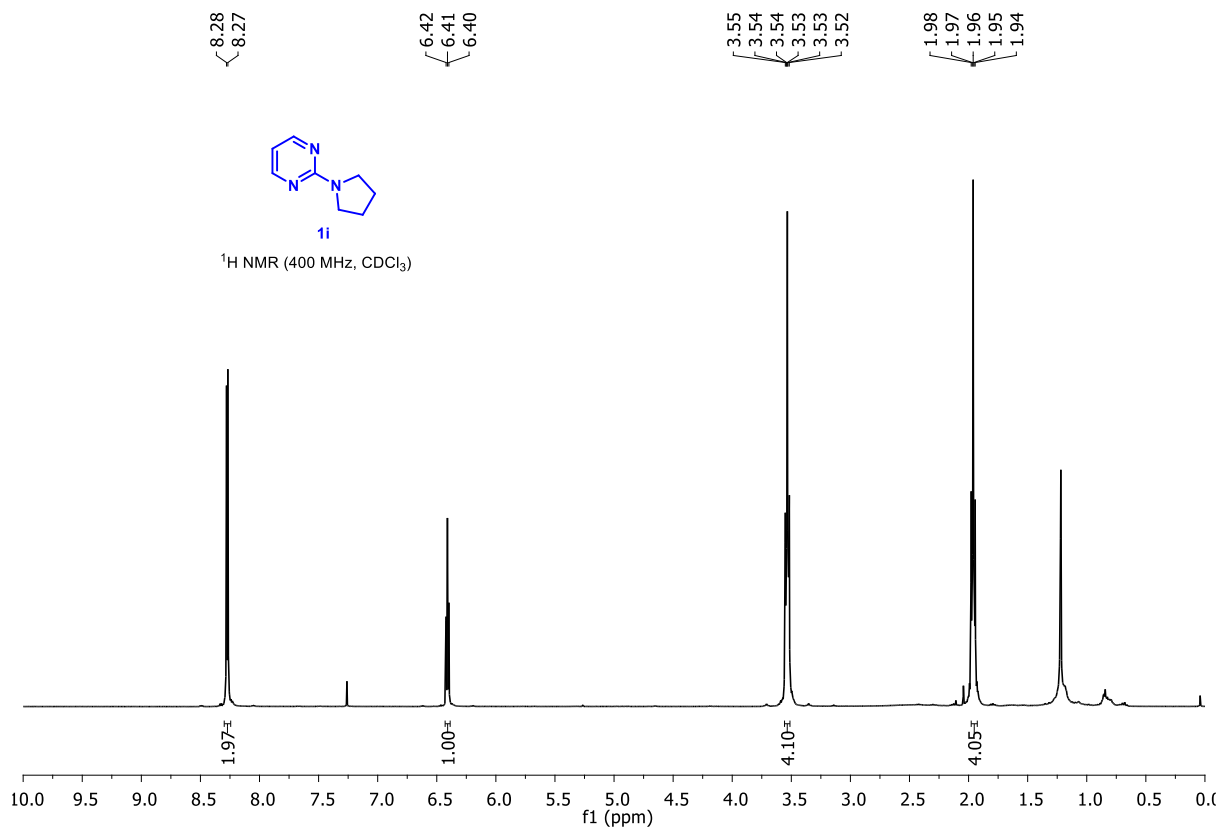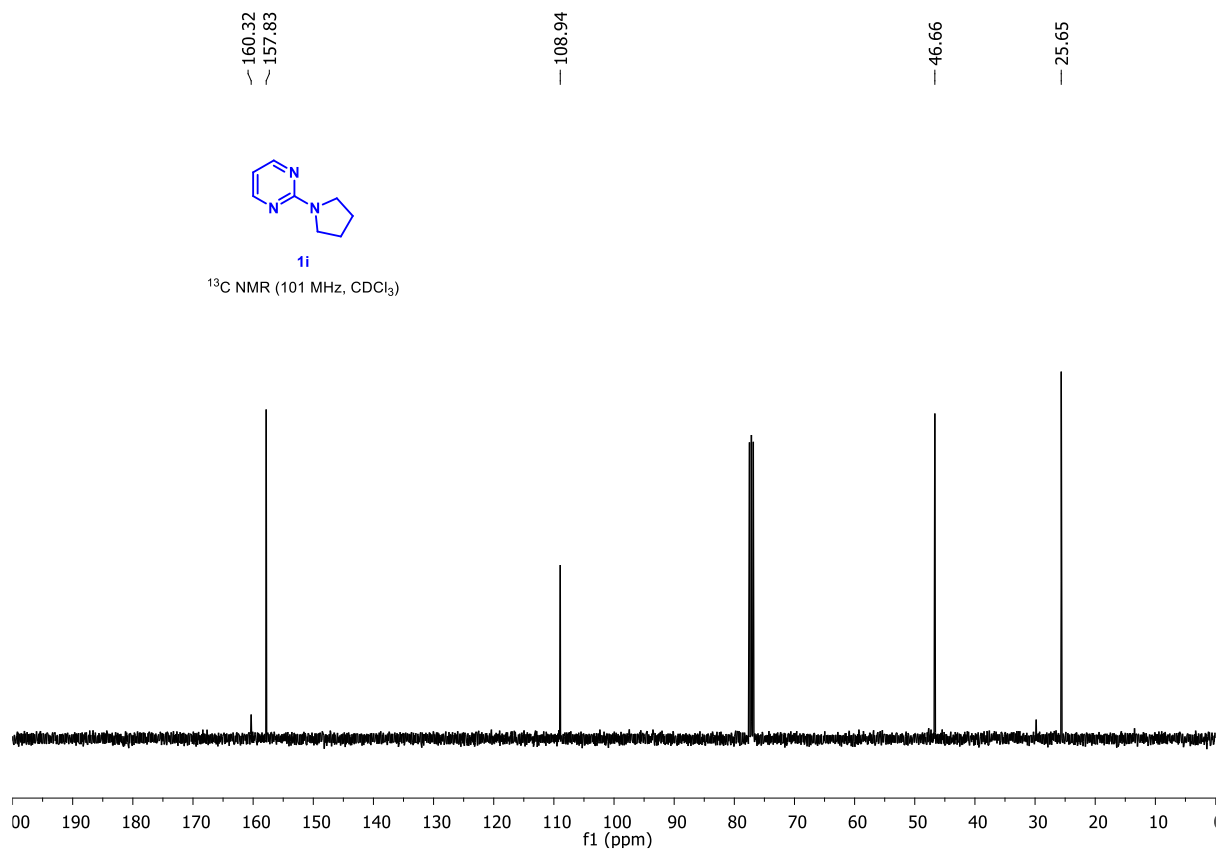

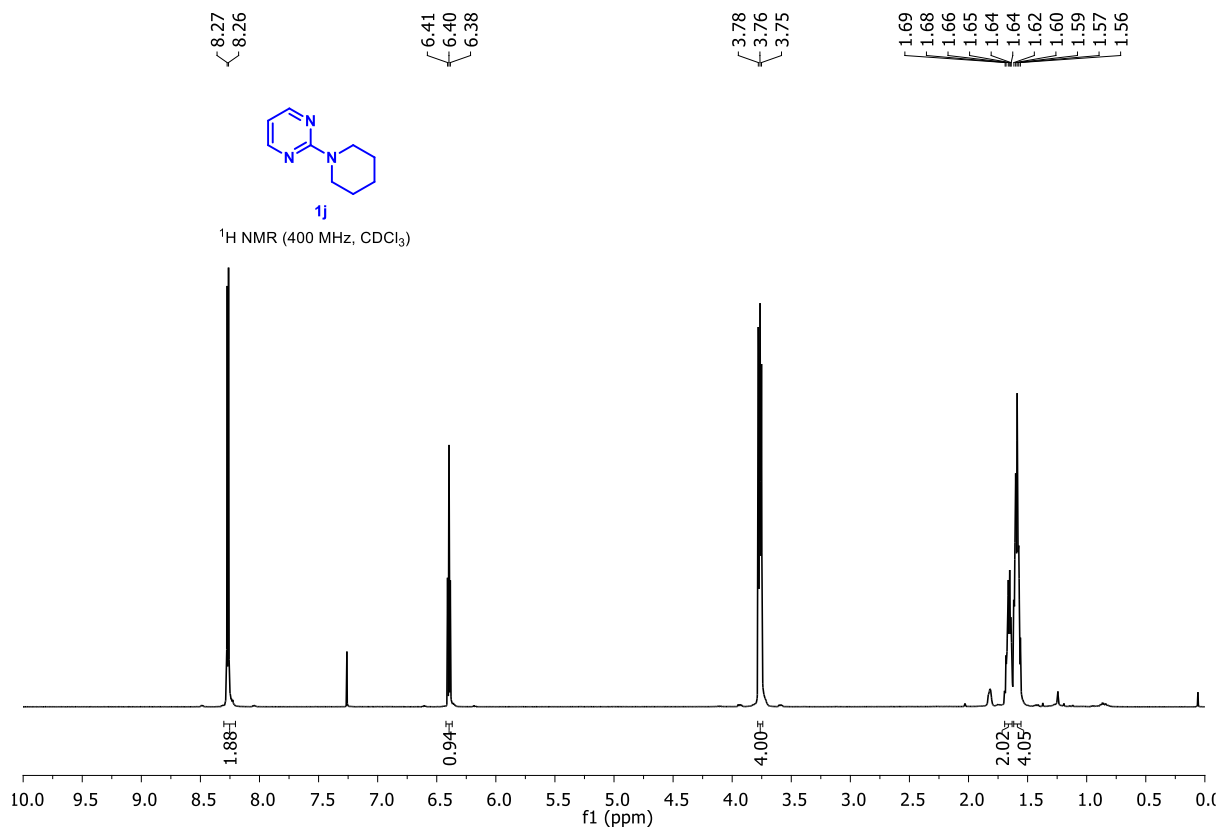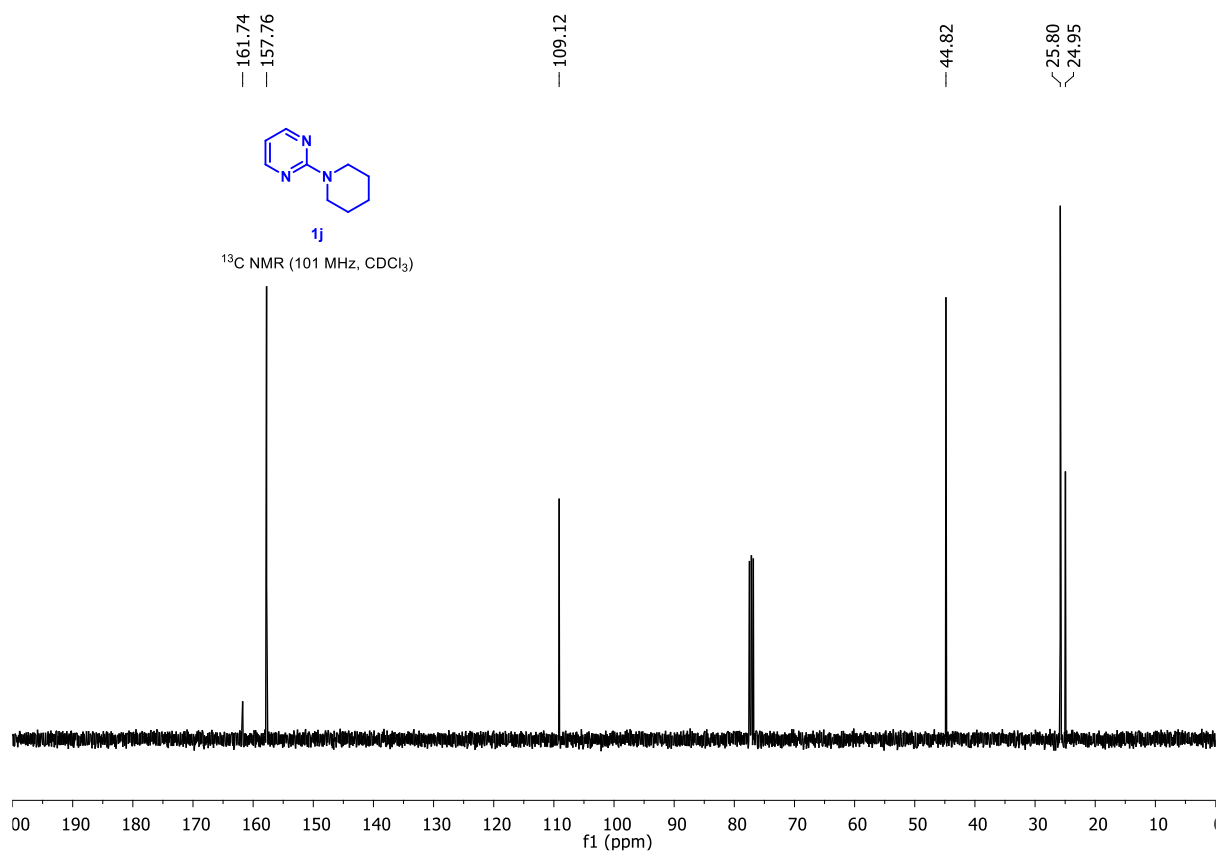



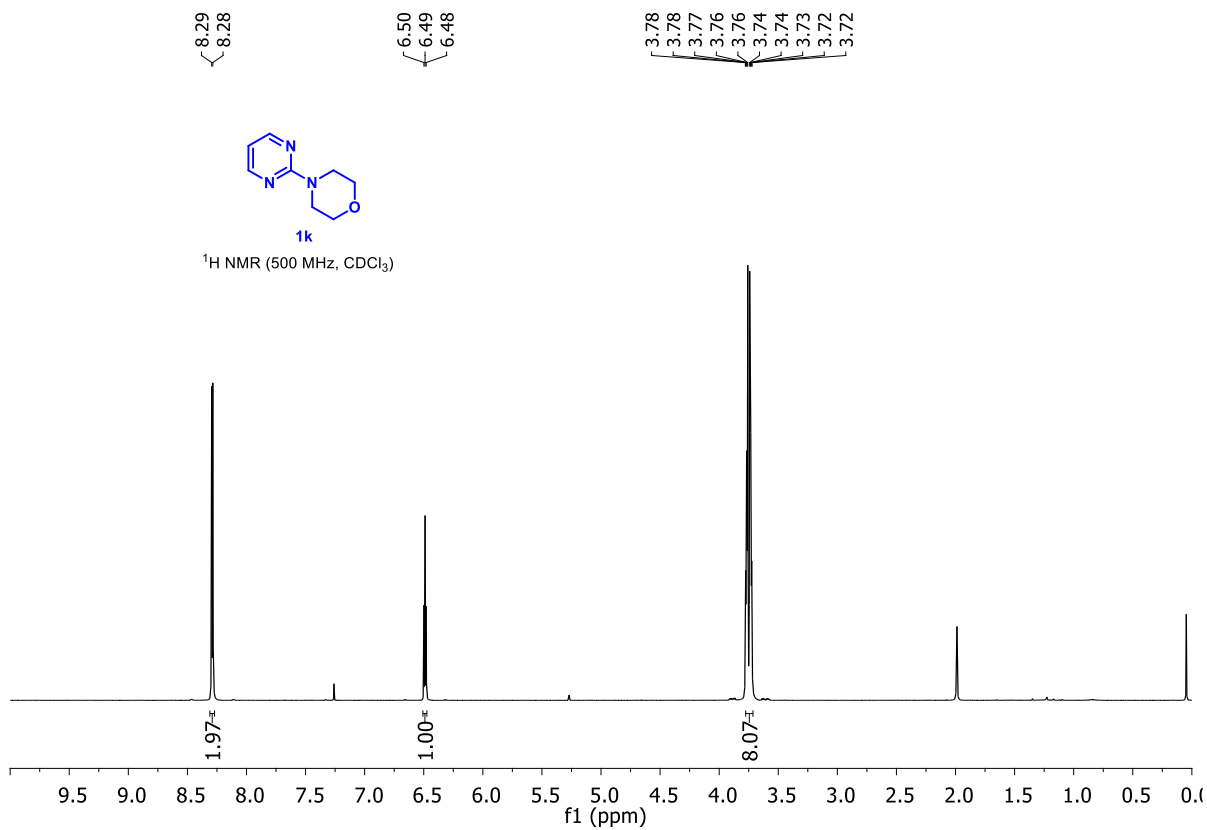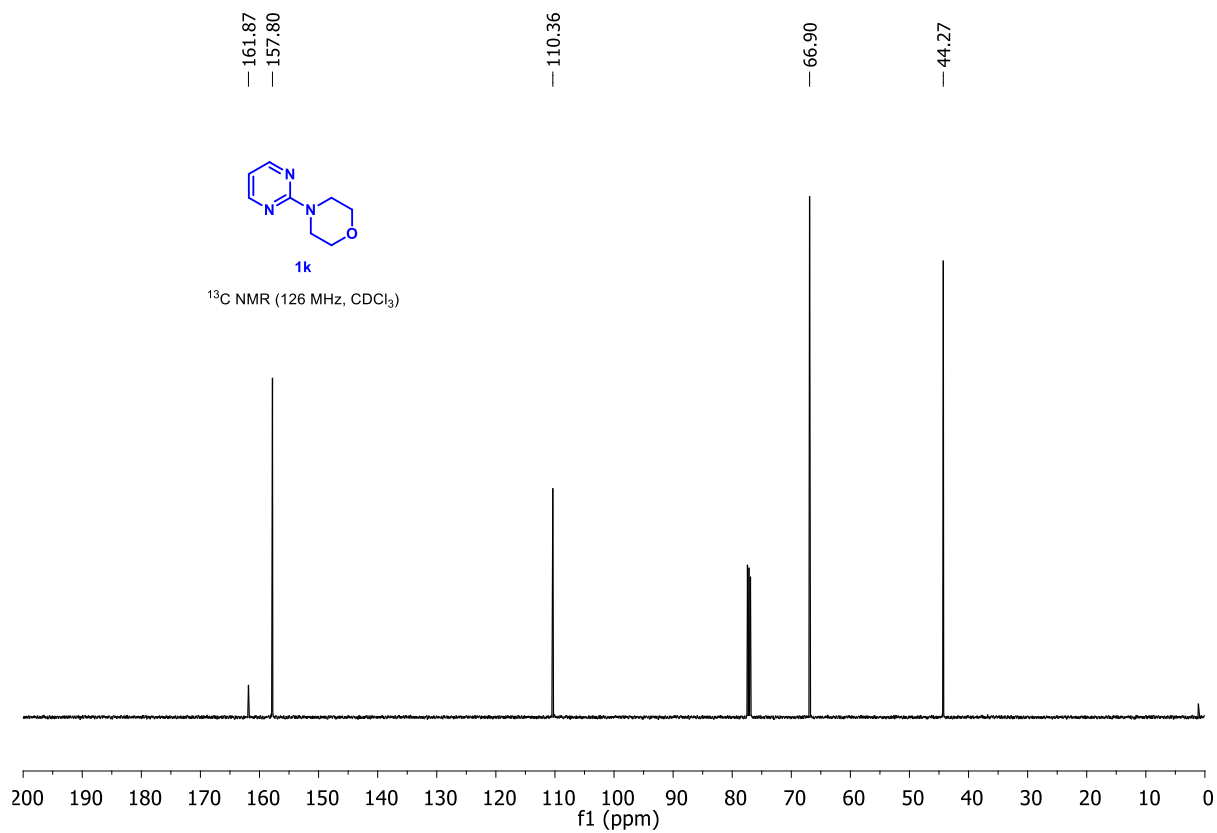

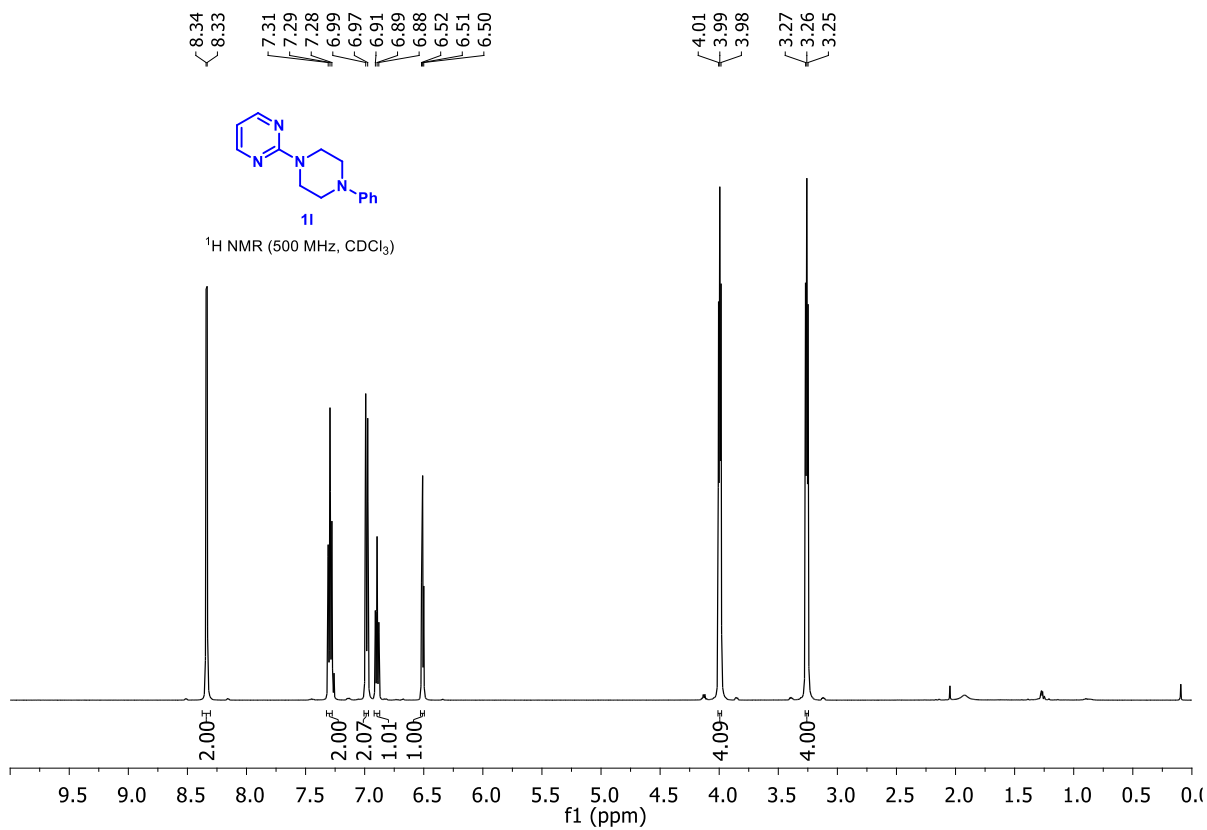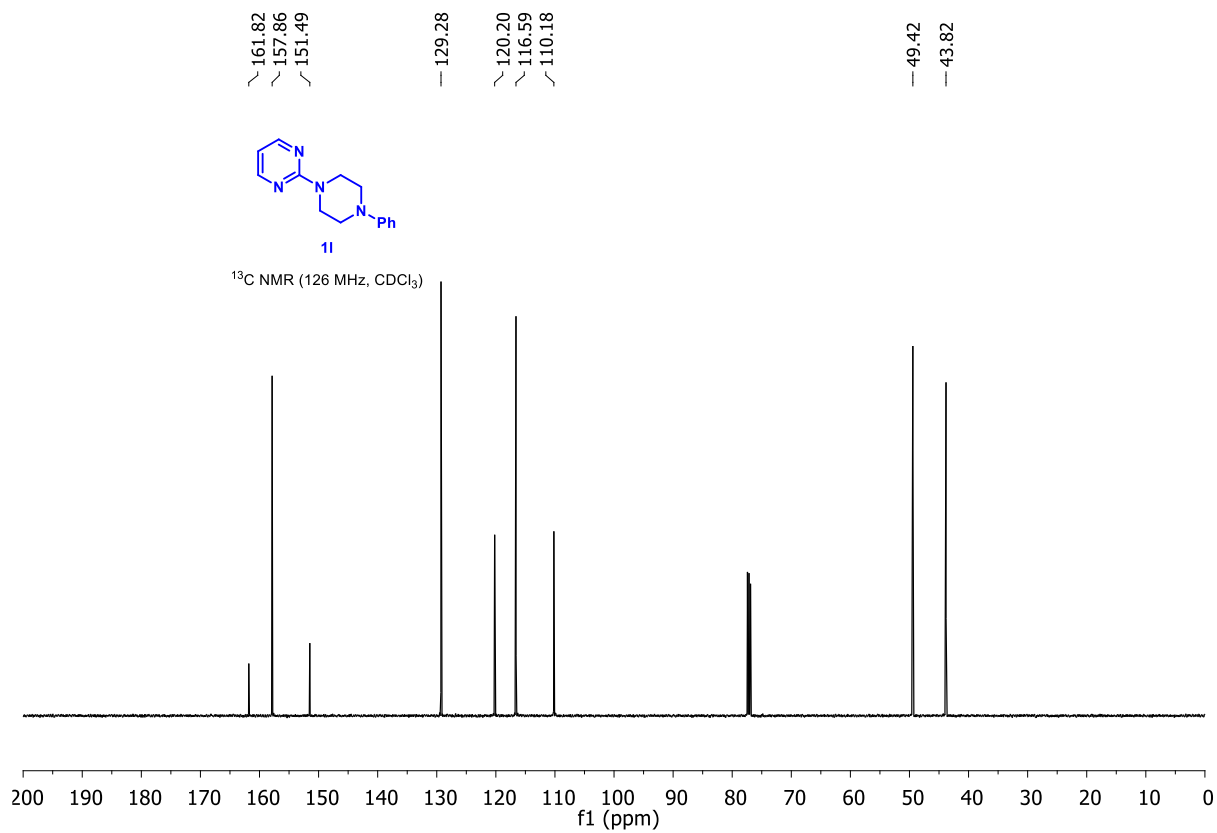

8.30  
8.28  
7.36  
7.35  
7.33  
7.31  
7.29  
7.28  
7.27

3.85  
3.83  
3.82  
3.56

2.53  
2.51  
2.50

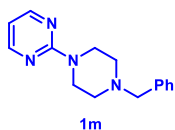

<sup>1</sup>H NMR (400 MHz, CDCl<sub>3</sub>)

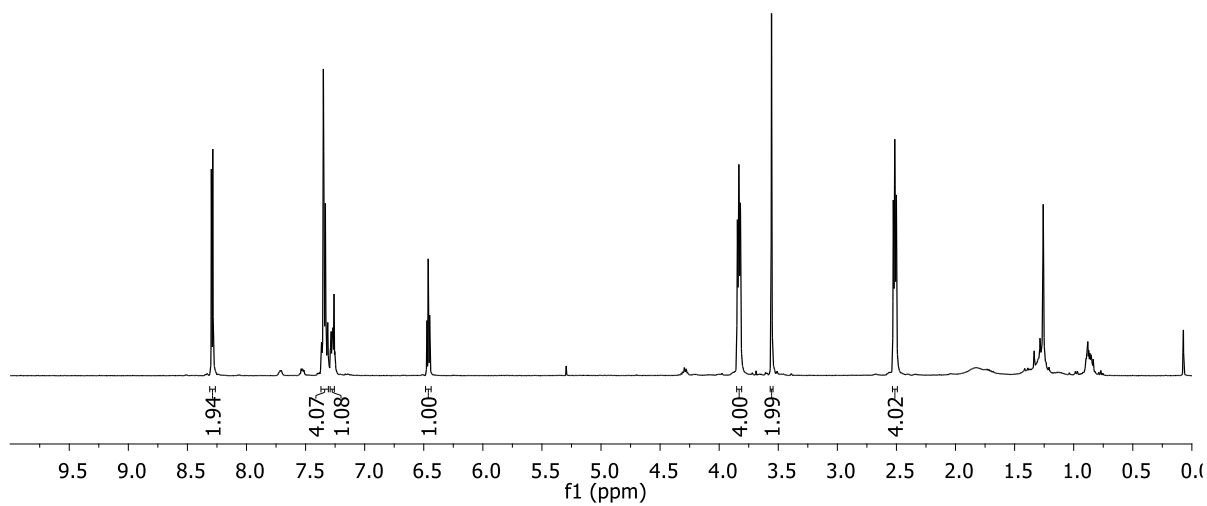

161.79  
157.83

138.04

129.35  
128.42  
127.29

109.86

63.30

53.10

43.79

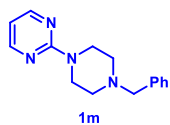

<sup>13</sup>C NMR (101 MHz, CDCl<sub>3</sub>)

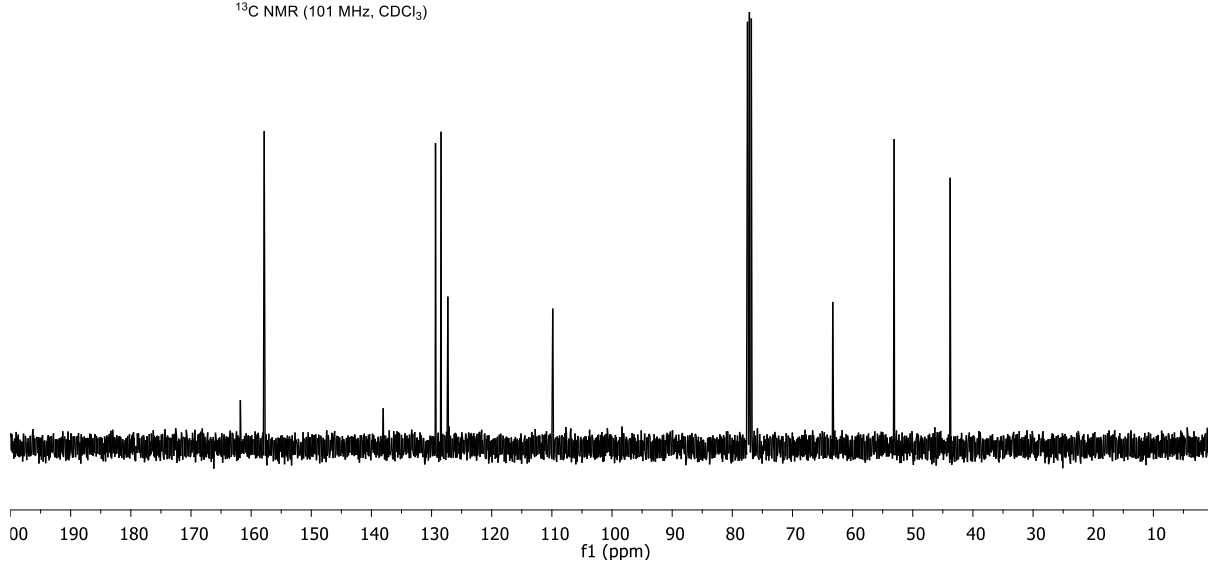

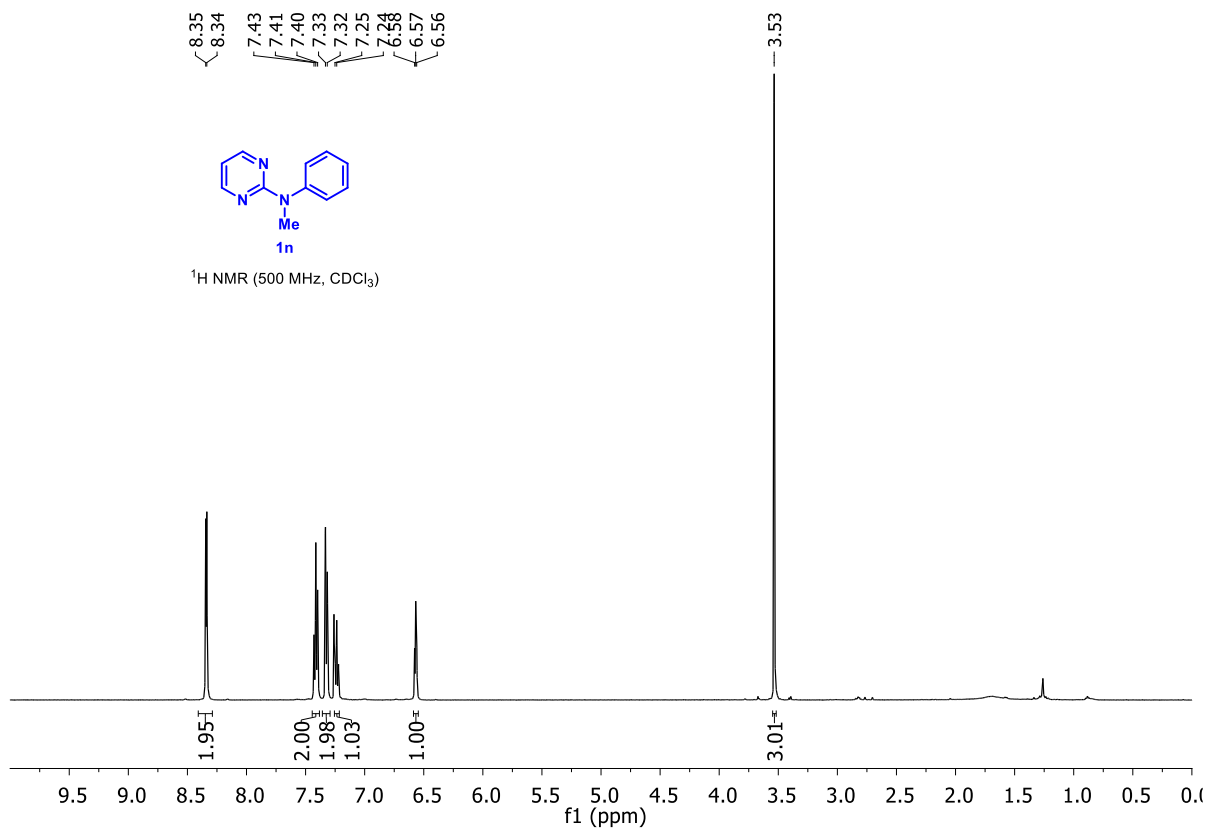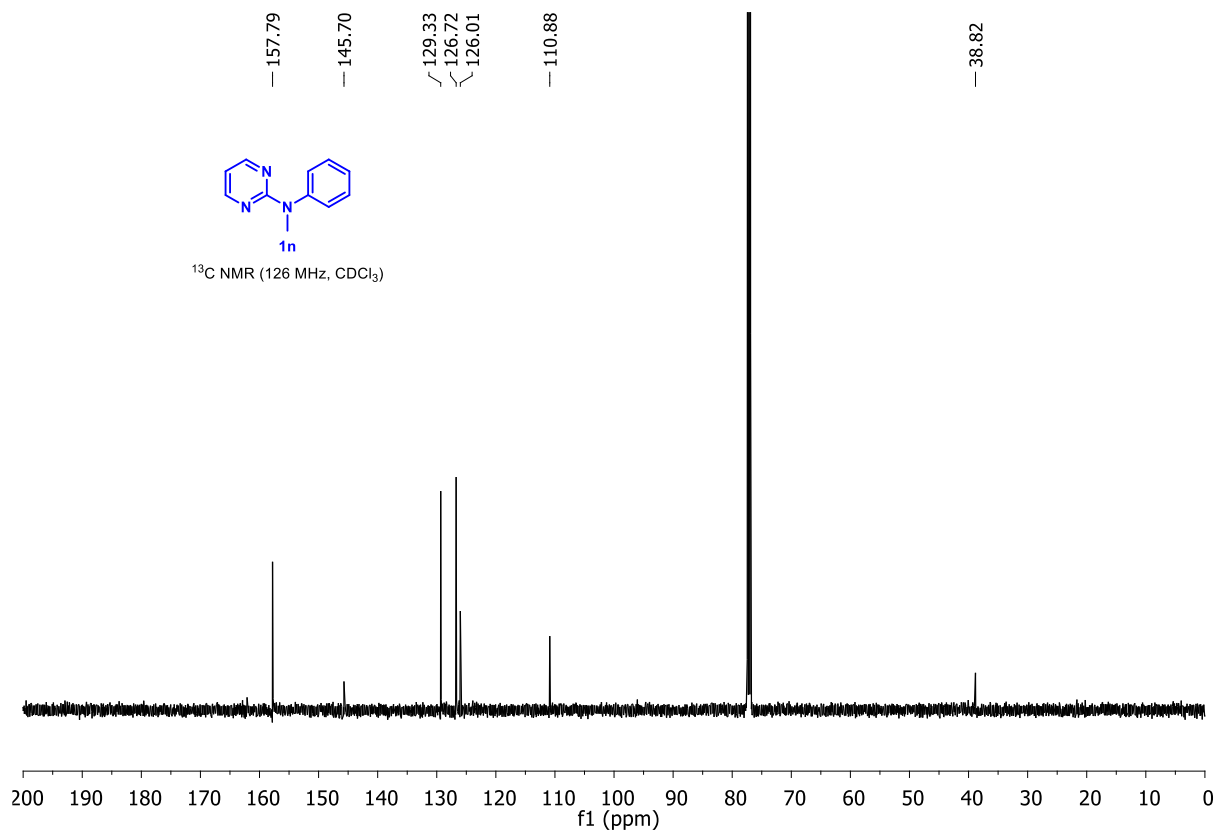

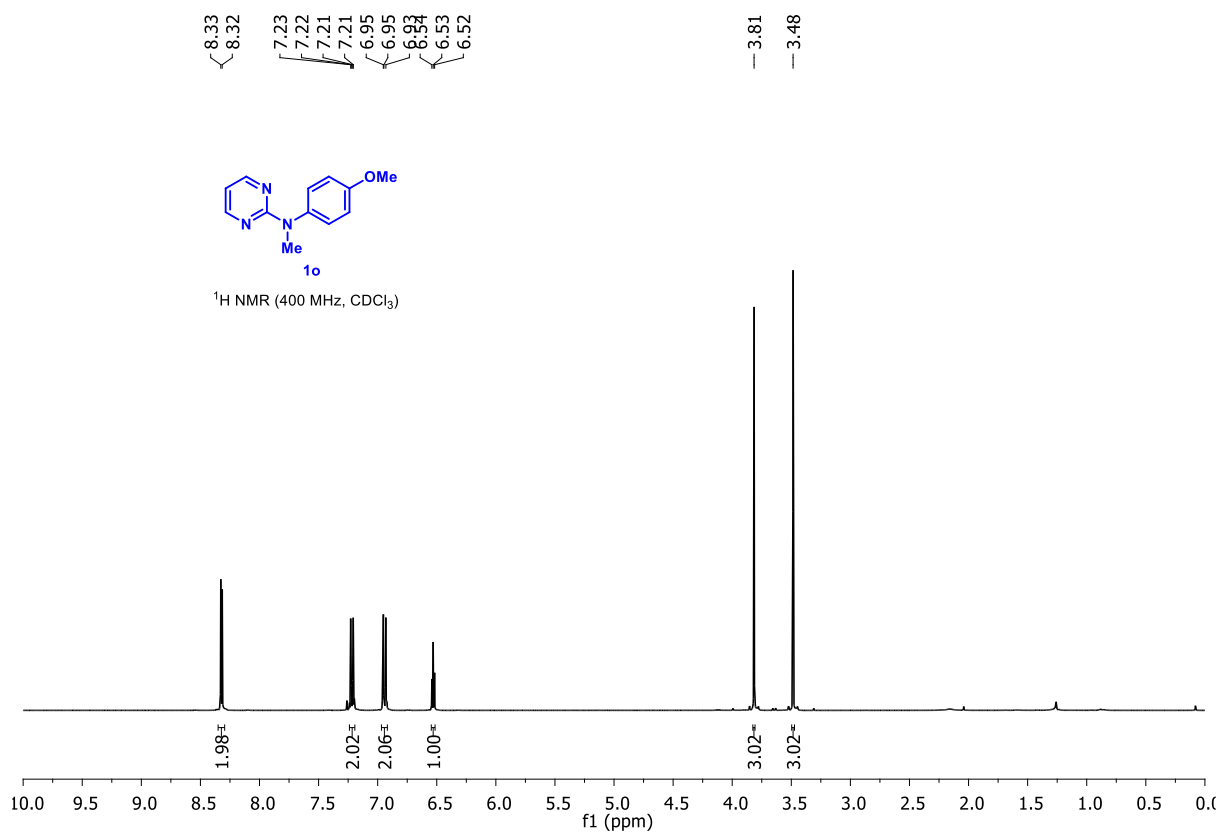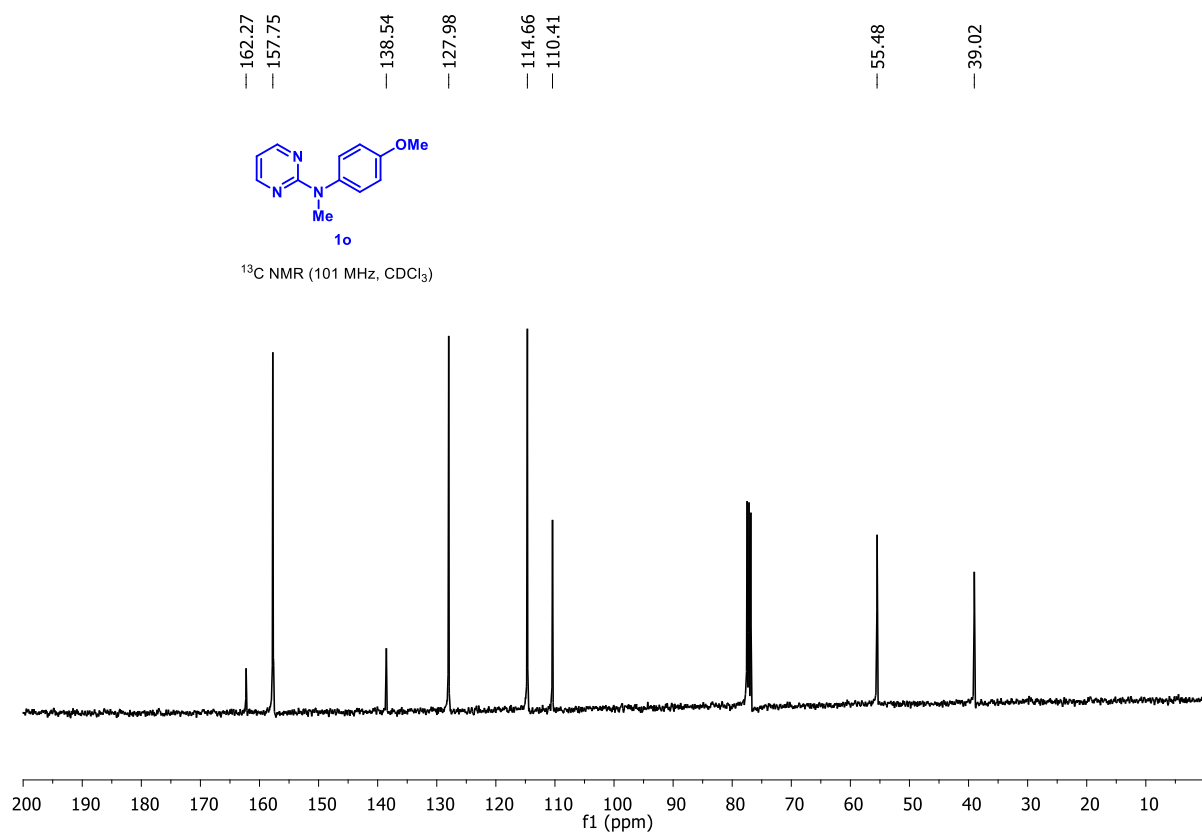

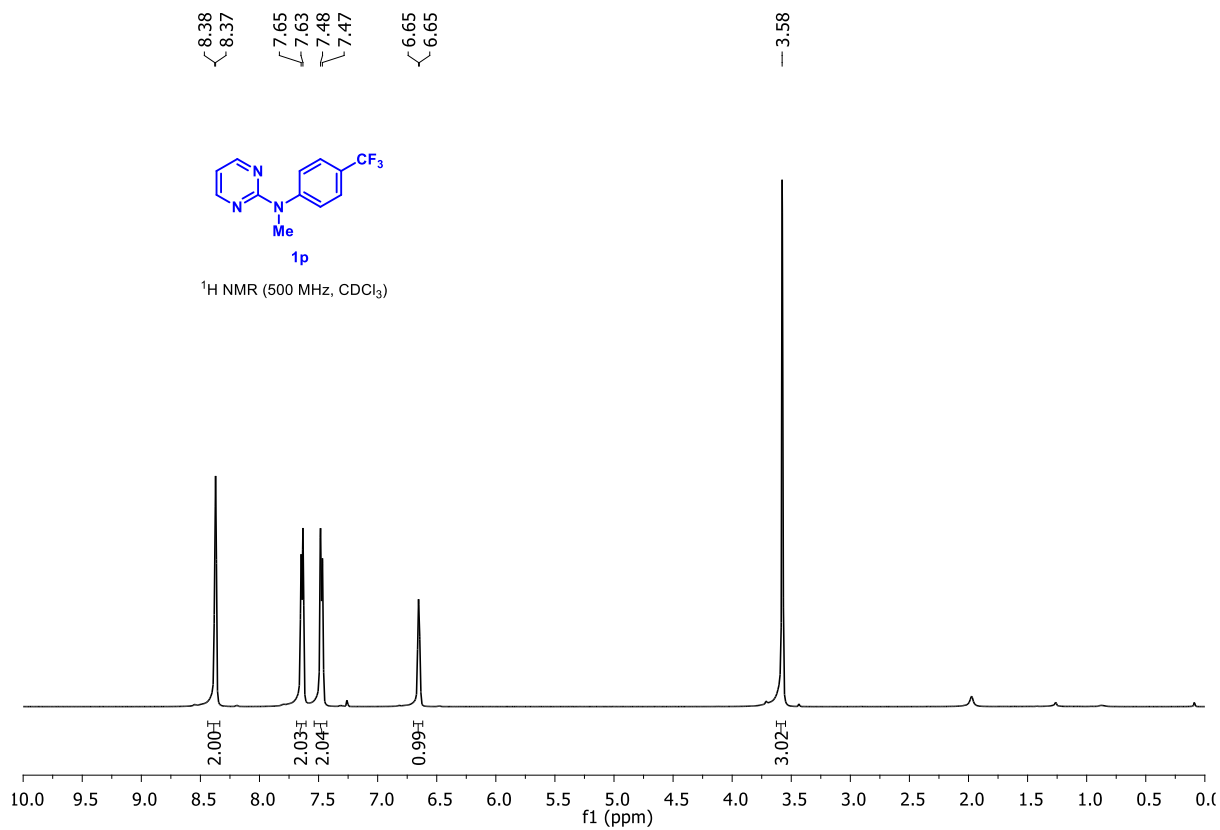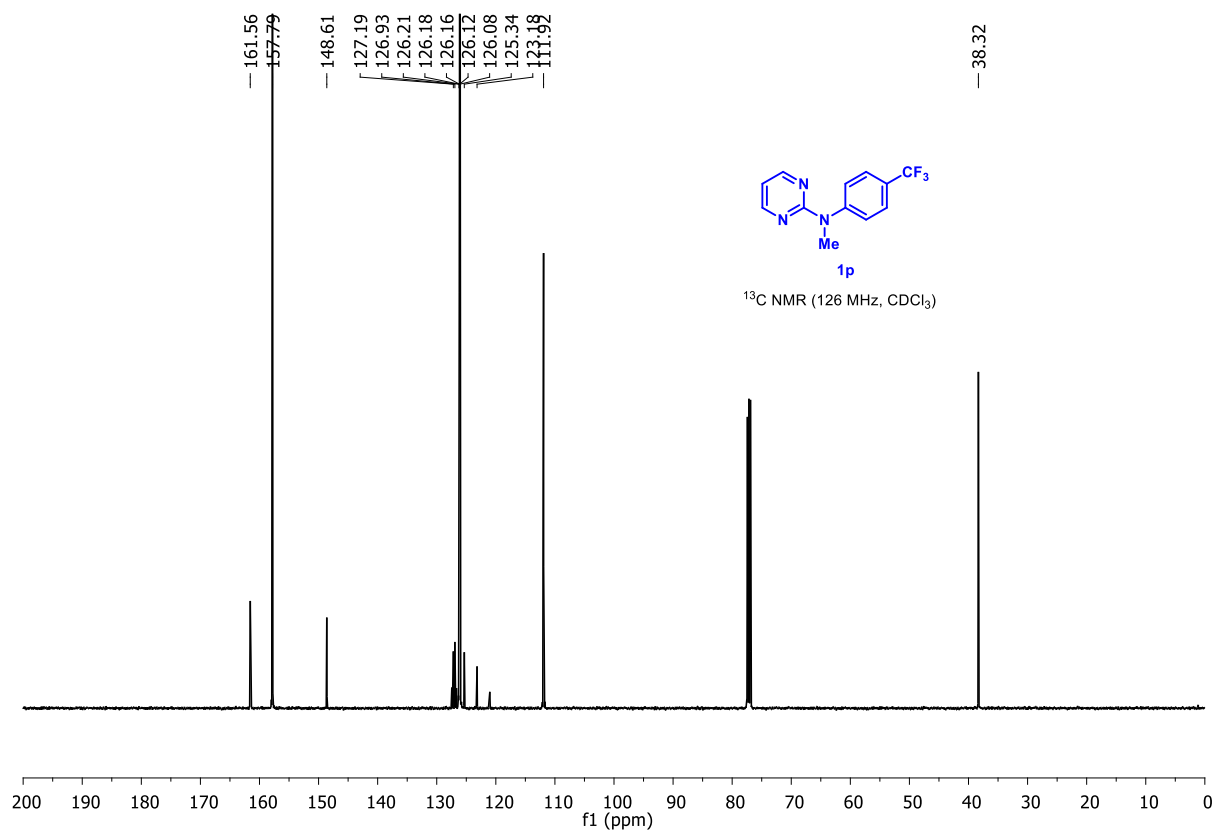

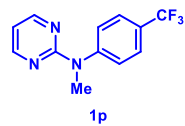

<sup>19</sup>F NMR (471 MHz, CDCl<sub>3</sub>)

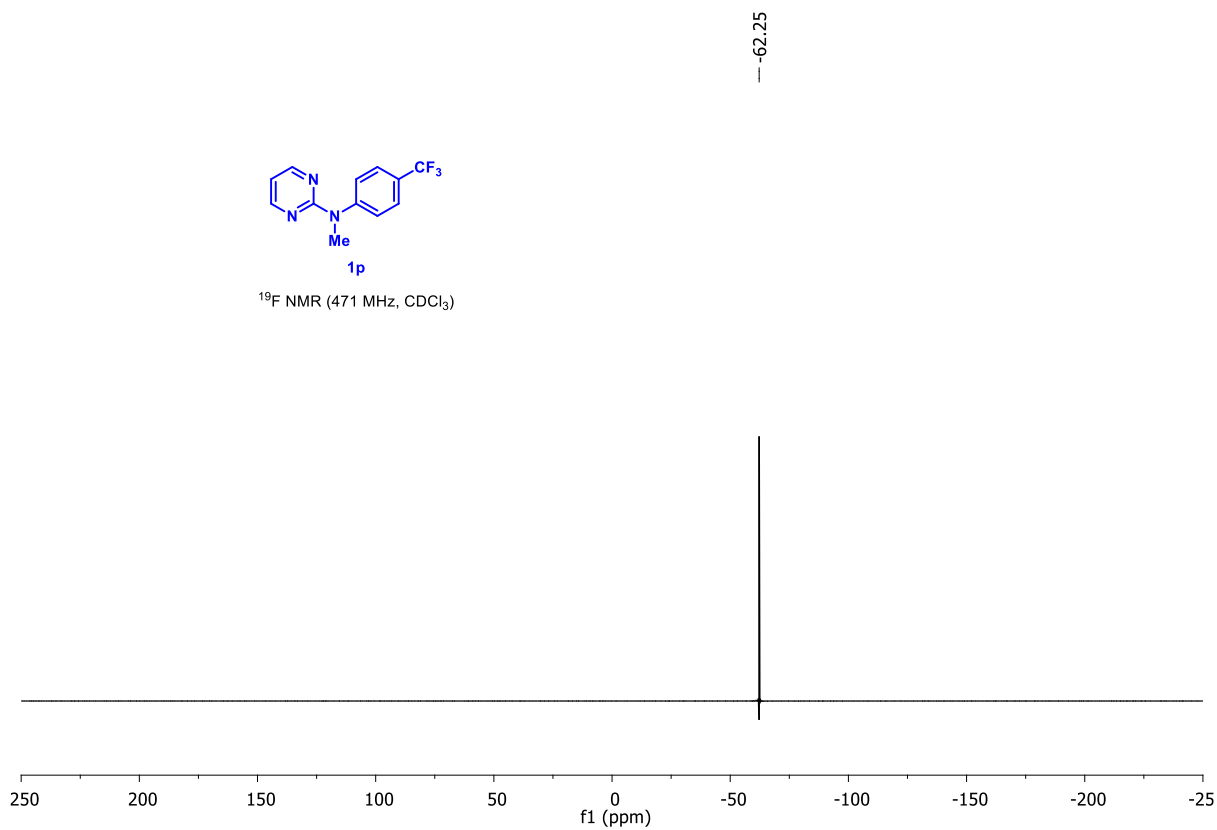

8.27, 8.26, 7.16, 7.14, 7.09, 7.07, 6.49, 6.48, 6.47, 3.97, 3.95, 3.94, 3.91, 3.90, 3.80, 3.77, 3.54, 3.52, 3.50, 3.48, 3.47, 3.44, 3.43, 3.42, 3.41, 3.40, 3.08, 3.06, 2.43, 2.41, 1.84, 1.82, 1.80, 1.79, 1.46, 1.45, 0.87, 0.86

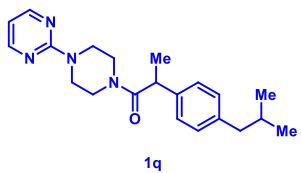

<sup>1</sup>H NMR (400 MHz, CDCl<sub>3</sub>)

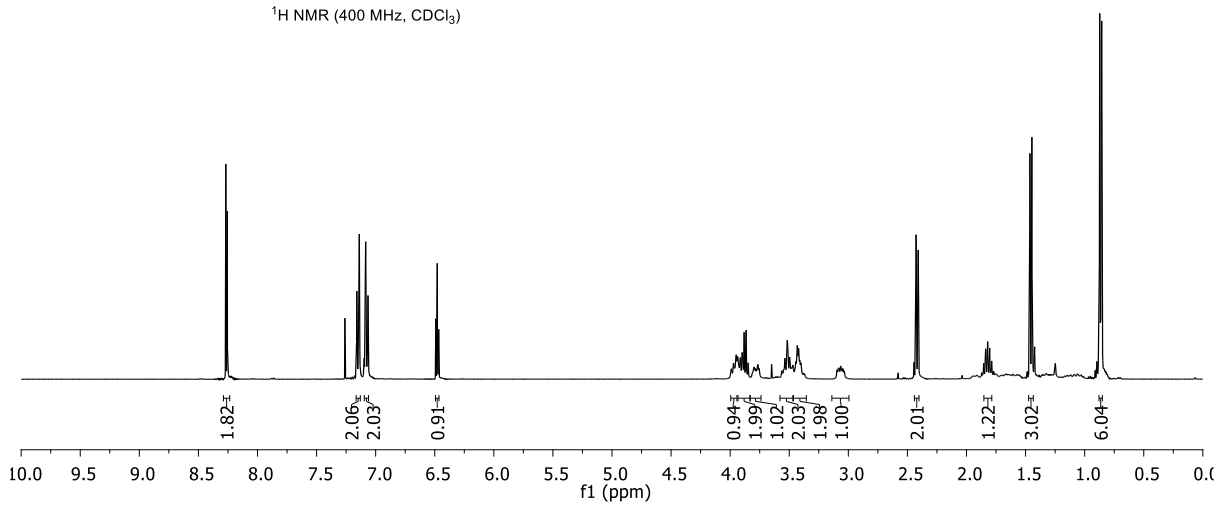

— 172.62  
 — 161.51  
 — 157.81  
 — 140.42  
 — 139.28  
 — 129.83  
 — 127.03  
 — 110.37  
 — 45.39  
 — 45.12  
 — 43.58  
 — 43.51  
 — 43.25  
 — 41.95  
 — 30.29  
 — 22.50  
 — 20.79

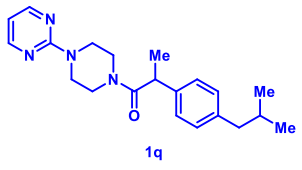

<sup>13</sup>C NMR (101 MHz, CDCl<sub>3</sub>)

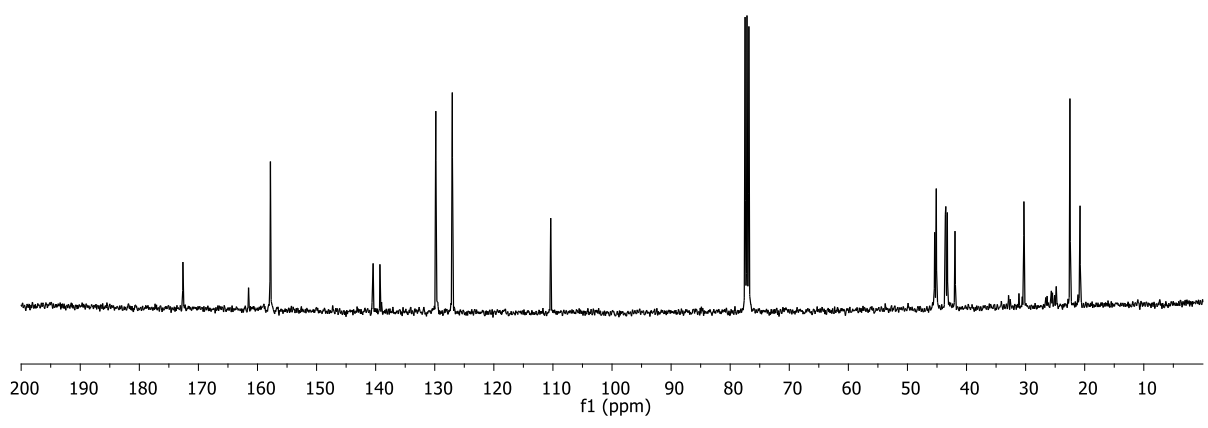

— 8.25  
 — 8.23  
 — 7.72  
 — 7.69  
 — 7.69  
 — 7.66  
 — 7.62  
 — 7.14  
 — 7.11  
 — 6.48  
 — 6.46  
 — 6.45  
 — 4.05  
 — 4.03  
 — 4.02  
 — 3.97  
 — 3.96  
 — 3.96  
 — 3.95  
 — 3.94  
 — 3.93  
 — 3.90  
 — 3.74  
 — 3.56  
 — 3.53  
 — 3.48  
 — 3.47  
 — 3.08  
 — 3.07  
 — 3.05  
 — 3.03  
 — 3.02  
 — 1.54  
 — 1.53

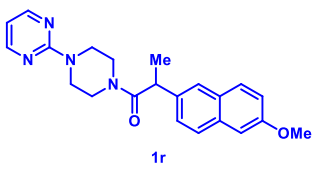

<sup>1</sup>H NMR (400 MHz, CDCl<sub>3</sub>)

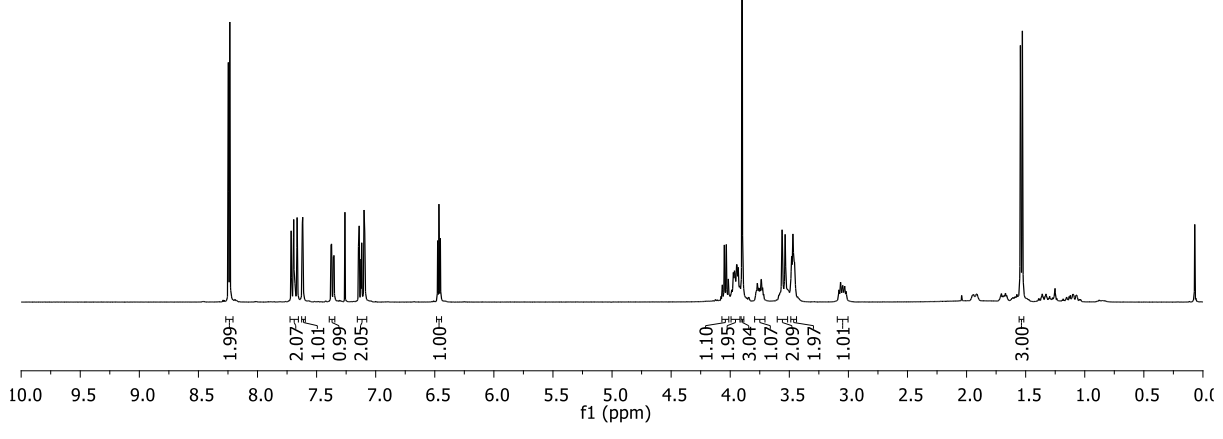



— 172.52  
 — 160.91  
 — 157.77  
 — 137.16  
 — 135.12  
 — 133.60  
 — 132.72  
 — 129.25  
 — 127.83  
 — 126.08  
 — 125.65  
 — 119.27  
 — 110.38  
 — 105.75

— 55.45  
 — 45.43  
 — 43.56  
 — 41.97  
 — 20.86

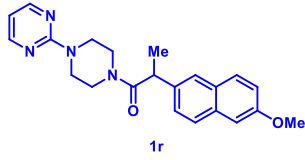

<sup>13</sup>C NMR (101 MHz, CDCl<sub>3</sub>)

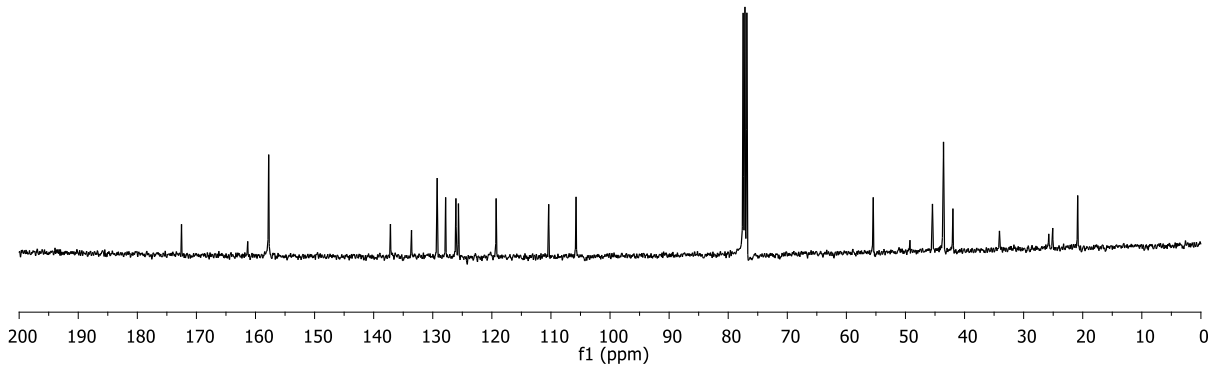

— 8.29  
 — 6.51  
 — 6.50  
 — 6.49  
 — 4.59  
 — 4.58  
 — 4.57  
 — 4.56  
 — 3.80  
 — 3.79  
 — 3.71  
 — 3.69  
 — 3.67  
 — 3.66  
 — 2.32  
 — 2.31  
 — 2.30  
 — 2.13  
 — 2.12  
 — 2.11  
 — 2.10  
 — 2.09  
 — 2.08  
 — 2.06  
 — 2.04  
 — 2.03  
 — 2.01  
 — 2.00

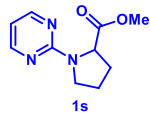

<sup>1</sup>H NMR (400 MHz, CDCl<sub>3</sub>)

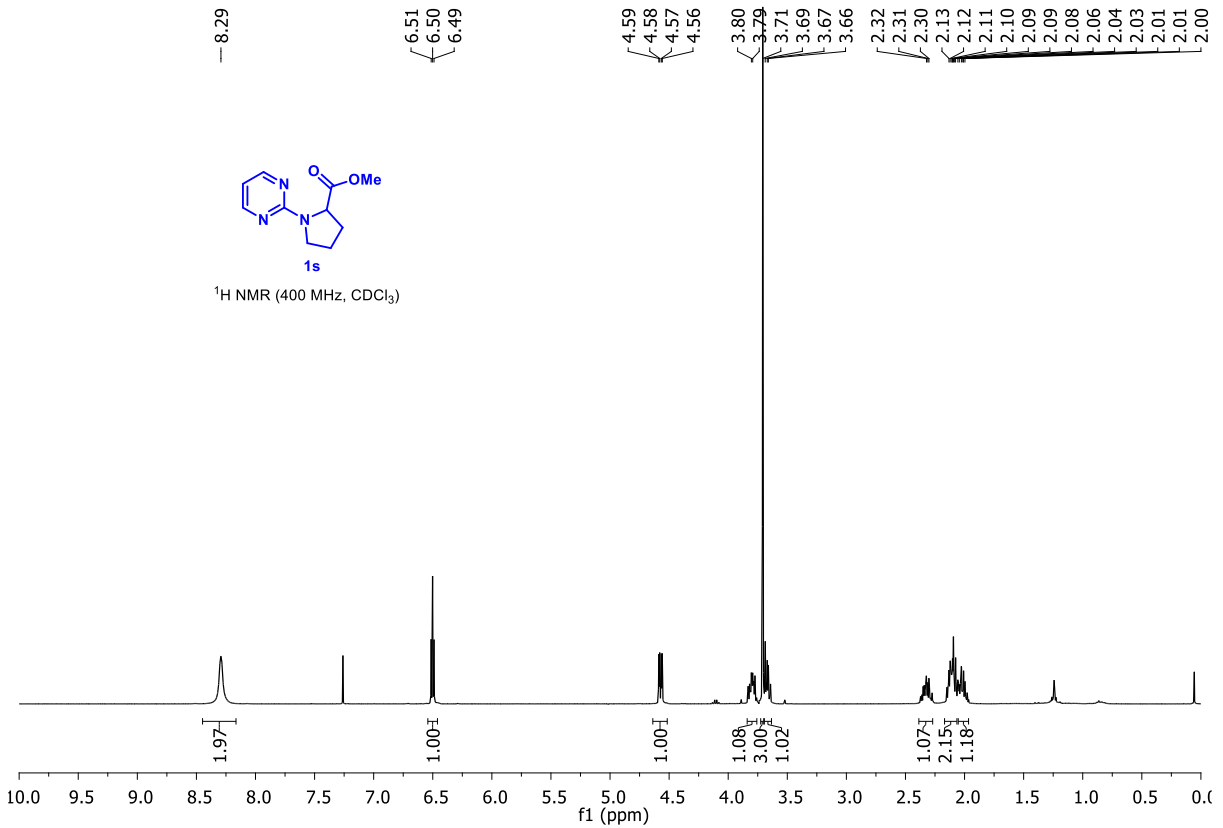

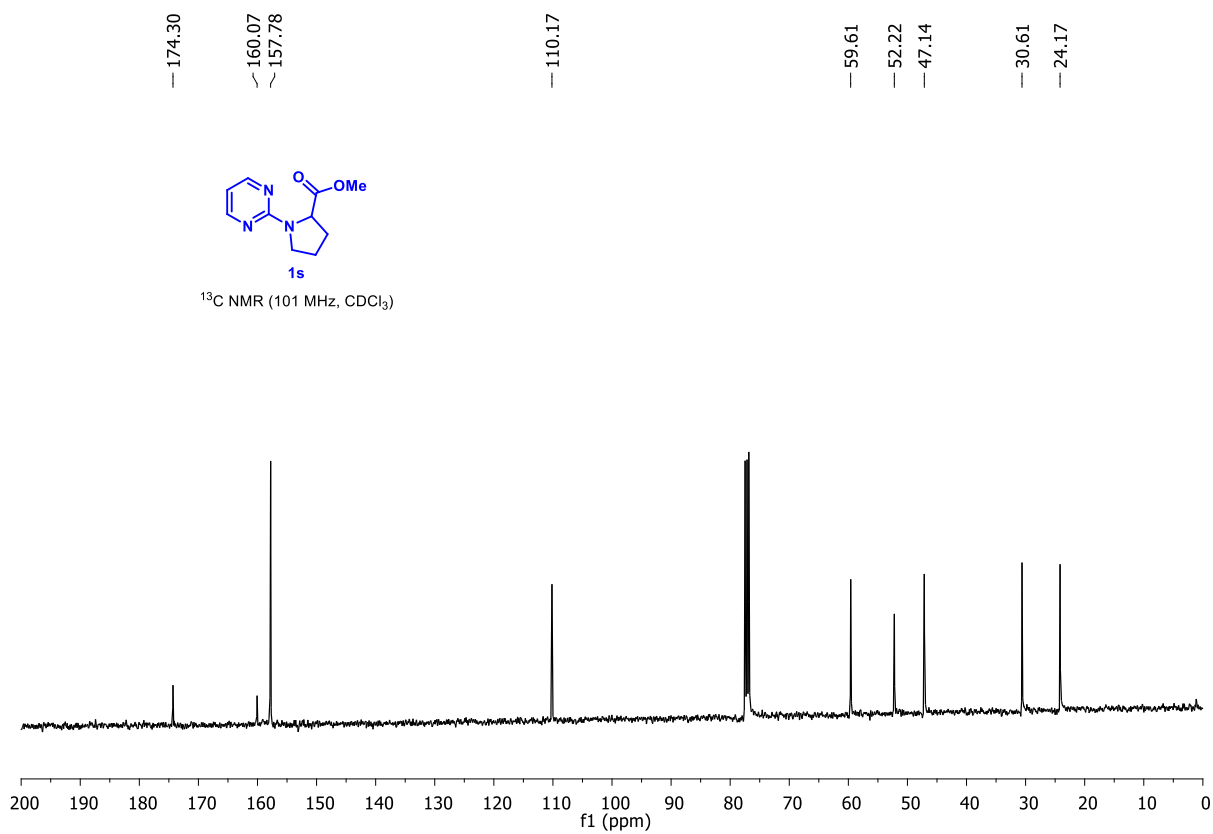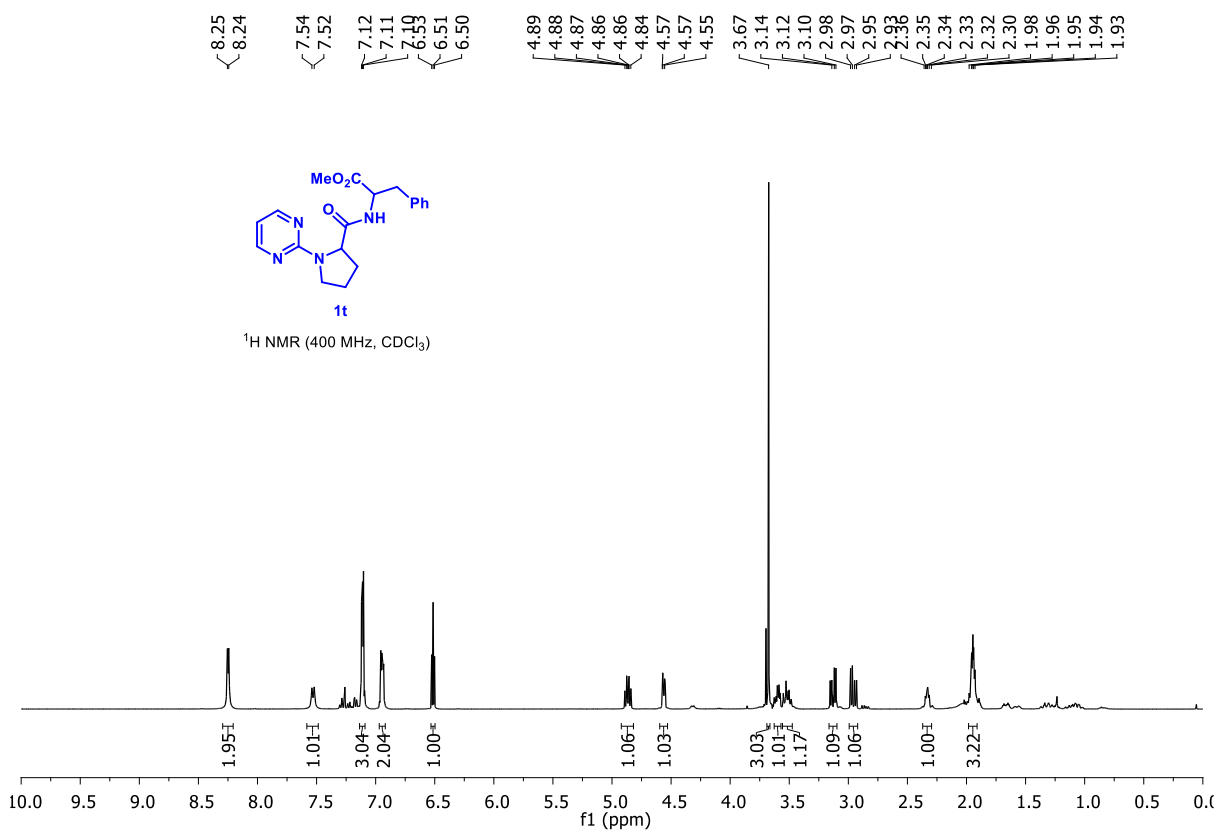

172.15  
171.96  
160.67  
157.71  
135.95  
129.17  
128.30  
126.90  
110.62

60.78  
53.13  
52.29  
47.74  
37.87  
28.96  
24.38

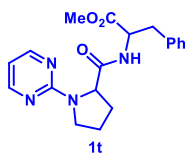

<sup>13</sup>C NMR (101 MHz, CDCl<sub>3</sub>)

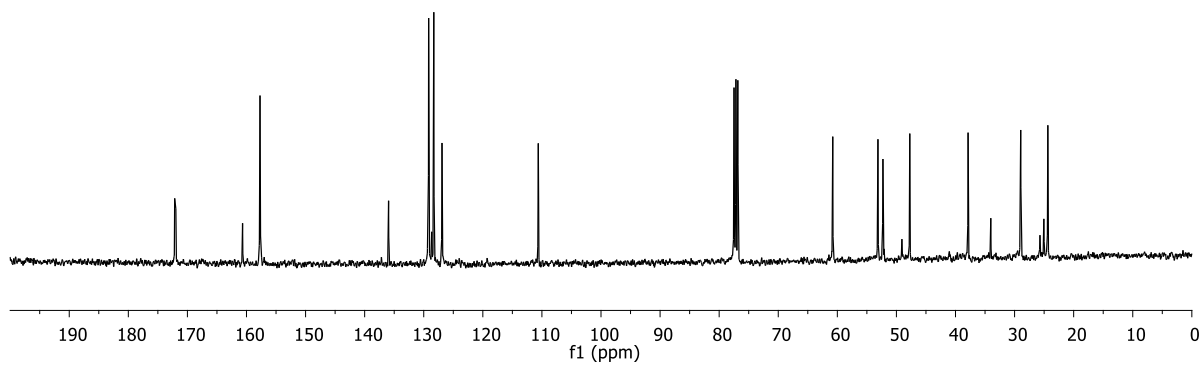

8.52  
8.51  
7.49  
7.48  
7.37  
7.36  
7.34  
7.30  
6.99  
6.92  
6.91  
5.45

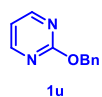

<sup>1</sup>H NMR (500 MHz, CDCl<sub>3</sub>)

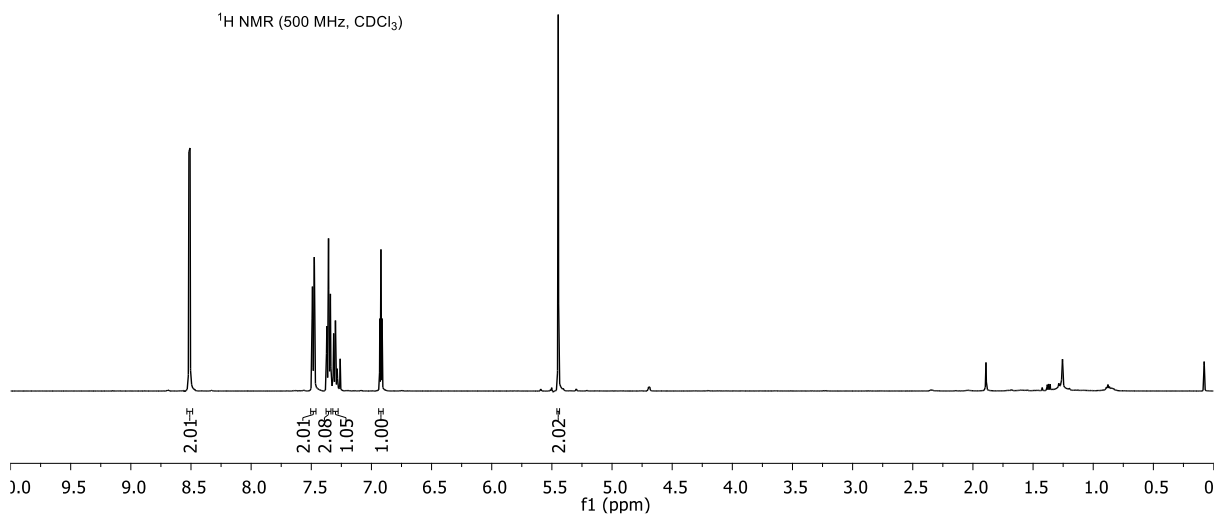

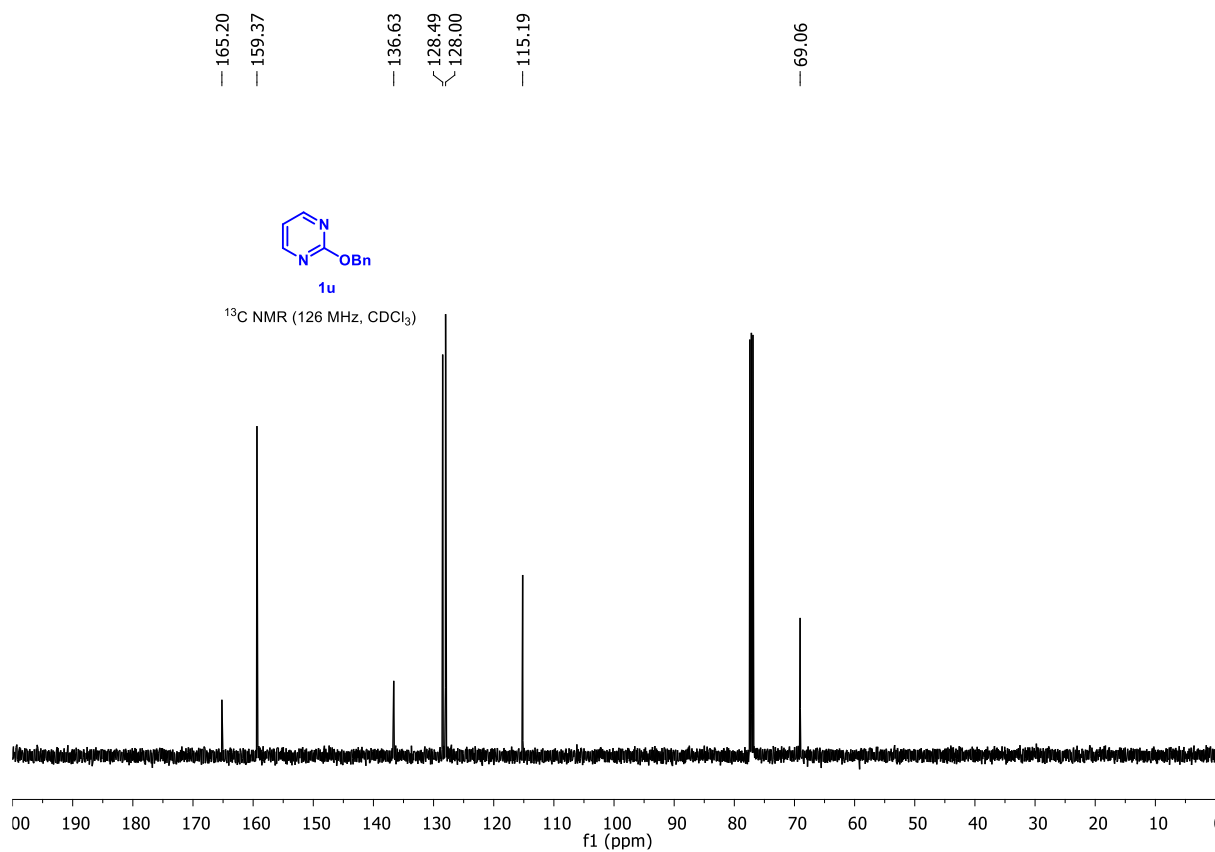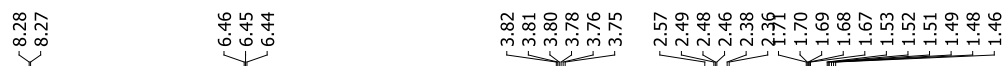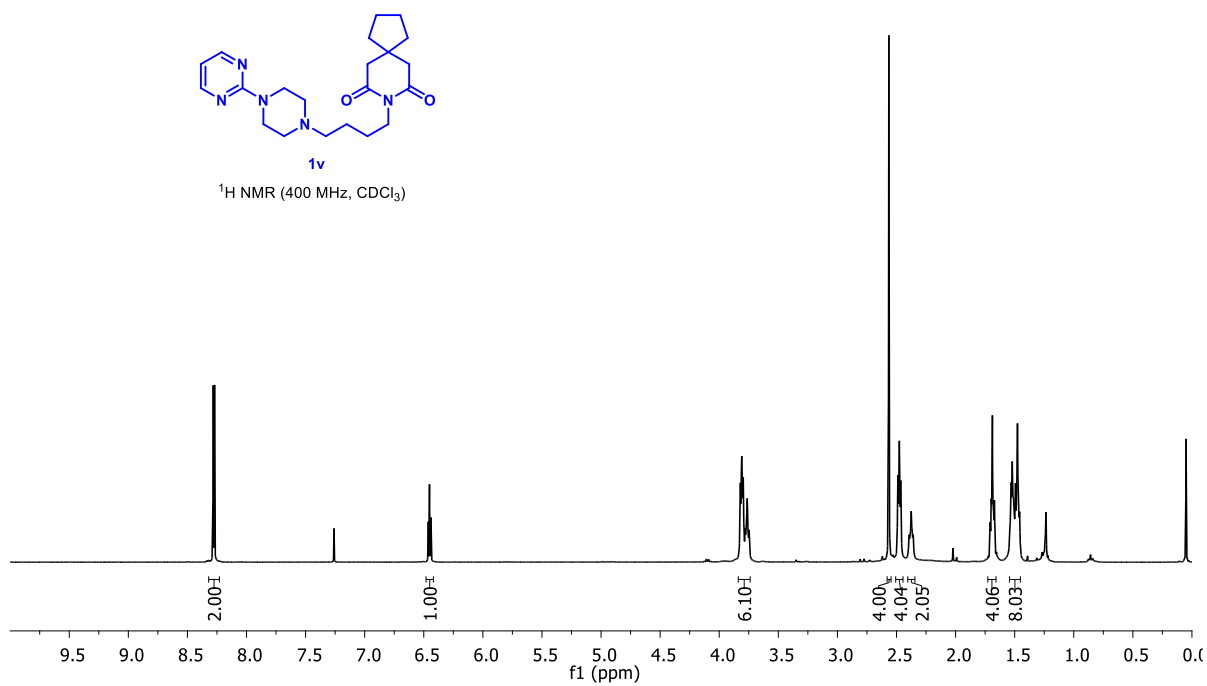

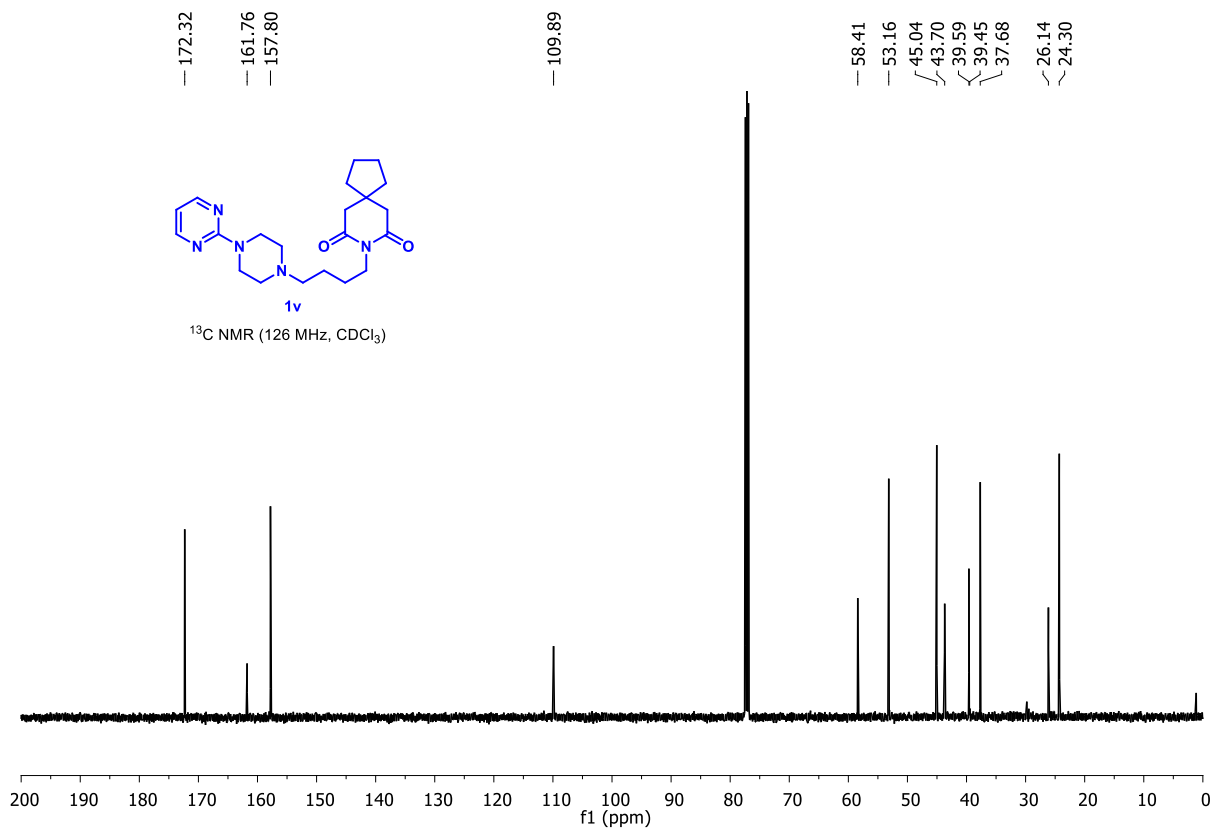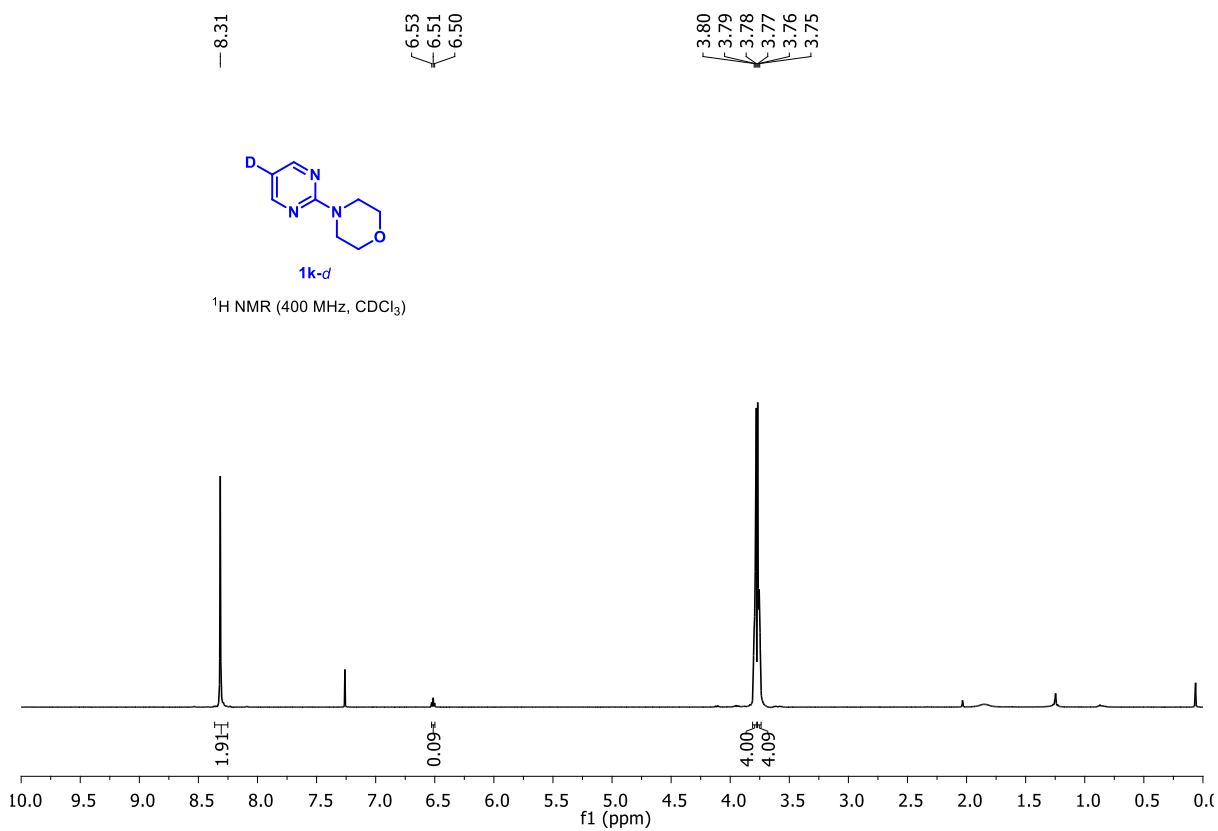

— 161.90  
— 157.78  
  
— 110.40  
  
— 66.96  
— 44.32

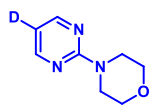

1k-d

<sup>13</sup>C NMR (101 MHz, CDCl<sub>3</sub>)

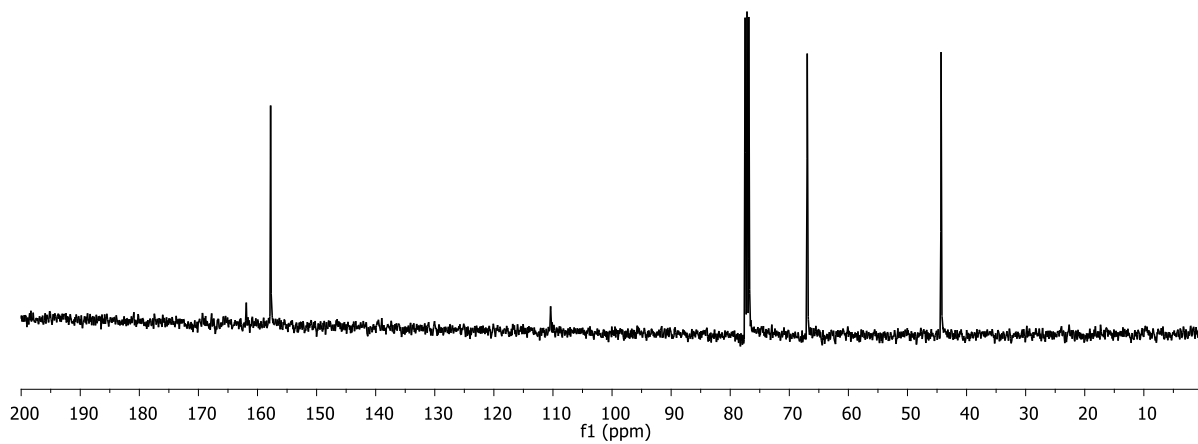

8.43  
7.71  
7.64  
7.64  
7.62  
7.37  
7.37  
7.35  
7.33  
7.08  
7.06  
7.04  
6.73  
6.72  
6.70

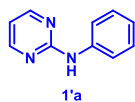

1'a

<sup>1</sup>H NMR (400 MHz, CDCl<sub>3</sub>)

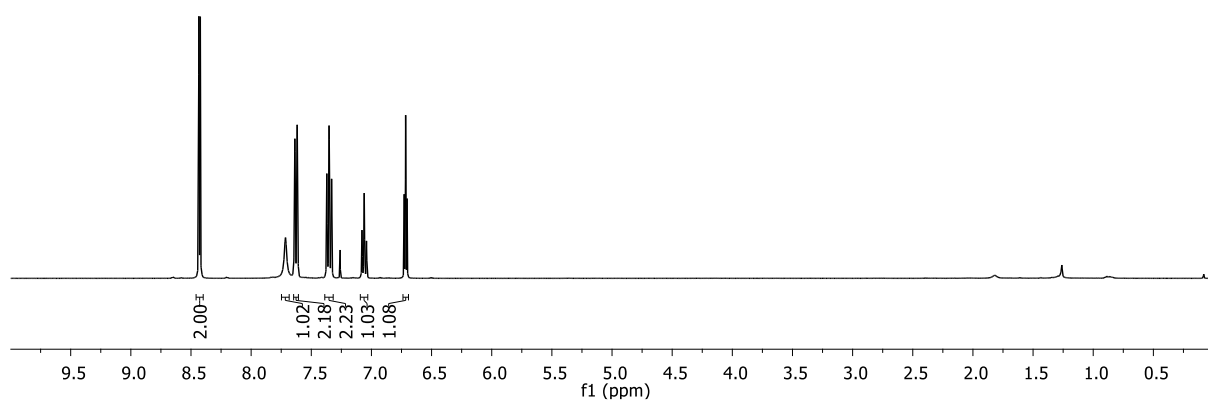

~ 160.37  
 ~ 158.13  
 — 139.53  
 ~ 129.08  
 ~ 122.88  
 ~ 119.74  
 — 112.60

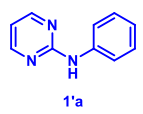

<sup>13</sup>C NMR (101 MHz, CDCl<sub>3</sub>)

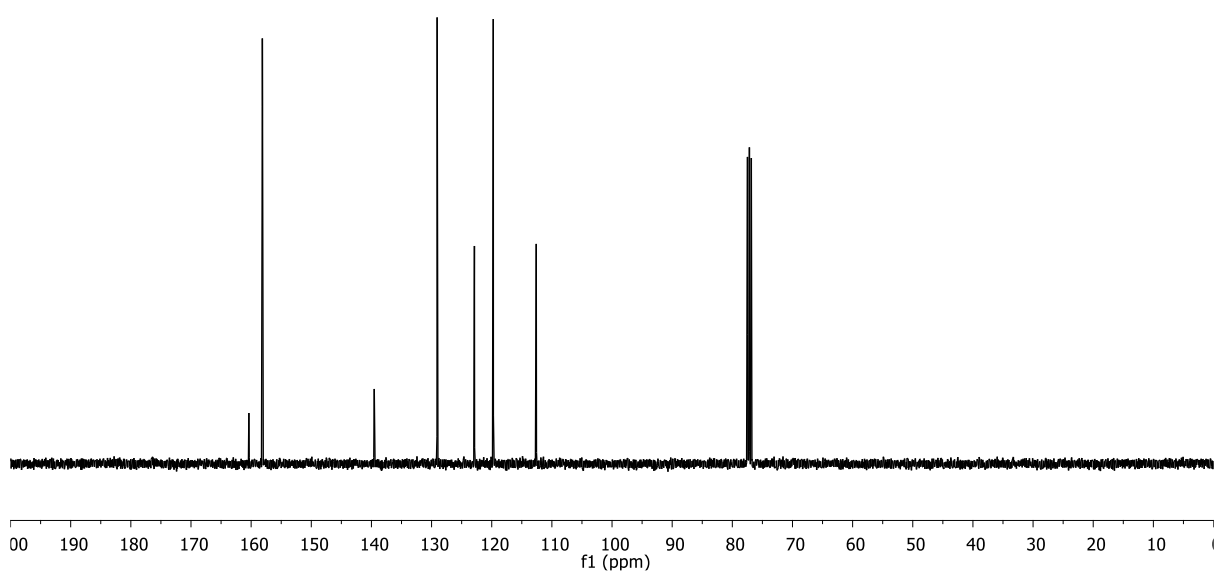

8.45  
 8.44  
 8.43  
 8.43  
 8.42  
 8.41  
 7.52  
 7.16  
 7.15  
 7.15  
 7.13  
 7.13  
 7.12  
 7.11  
 7.11  
 7.10  
 7.10  
 7.09  
 7.08  
 7.00  
 7.00  
 6.99  
 6.99  
 6.99  
 6.98  
 6.98  
 6.98  
 6.98  
 6.97  
 6.97  
 6.97  
 6.96  
 6.96  
 6.96  
 6.77  
 6.76  
 6.75

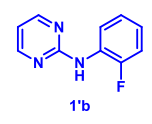

<sup>1</sup>H NMR (500 MHz, CDCl<sub>3</sub>)

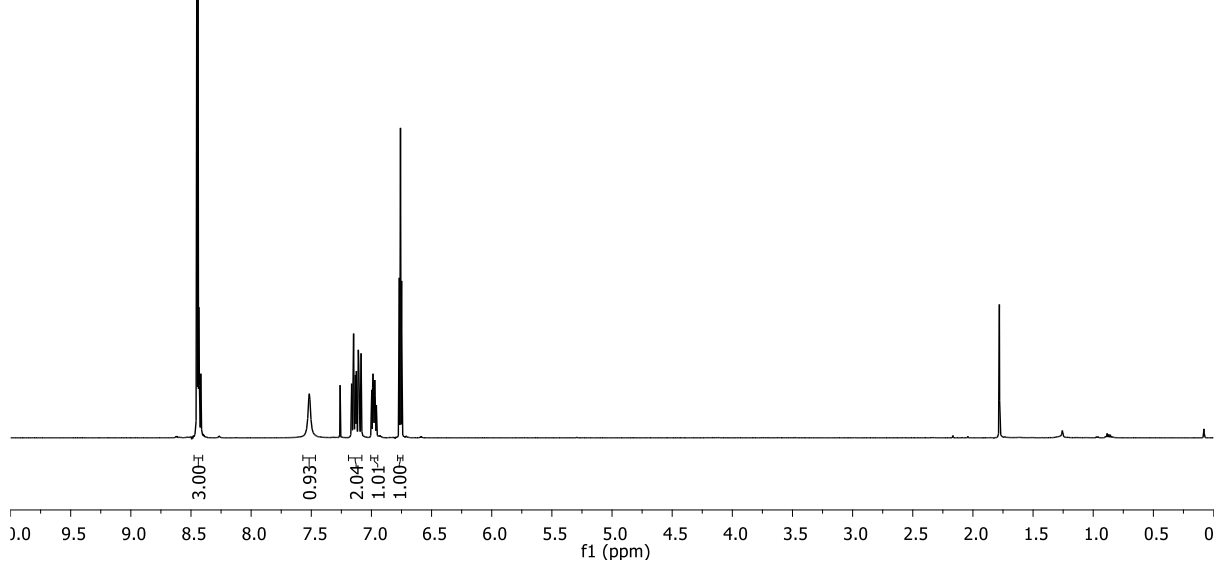

160.05  
158.14  
153.80  
151.86  
128.09  
128.01  
124.41  
124.38  
122.68  
122.62  
121.06  
115.03  
114.88  
113.17

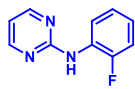

1'b

<sup>13</sup>C NMR (126 MHz, CDCl<sub>3</sub>)

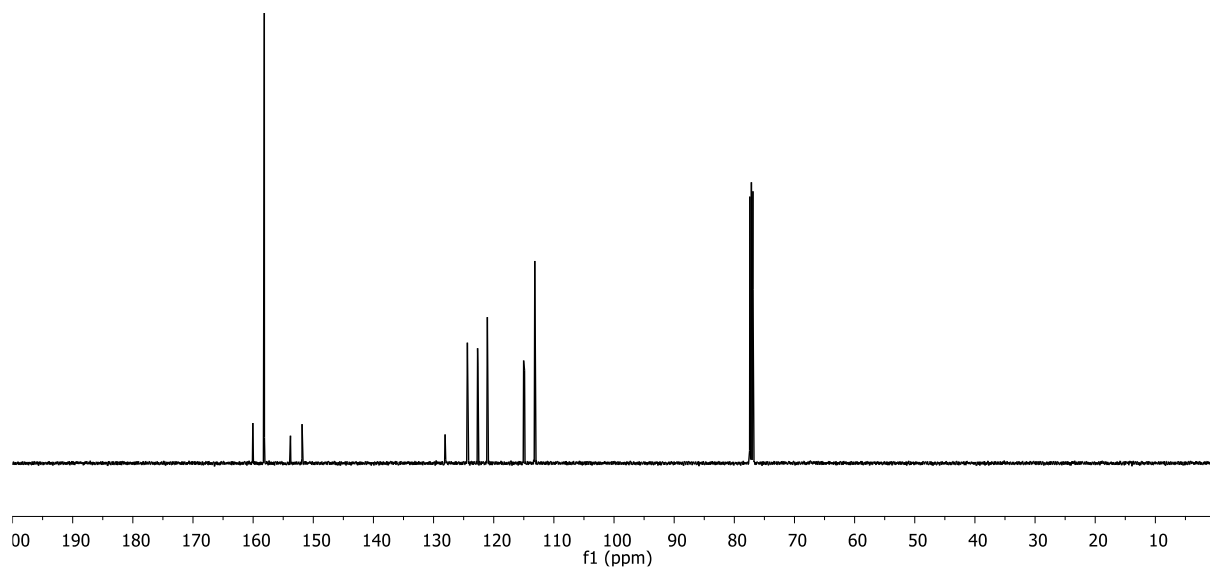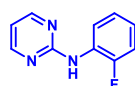

1'b

<sup>19</sup>F NMR (471 MHz, CDCl<sub>3</sub>)

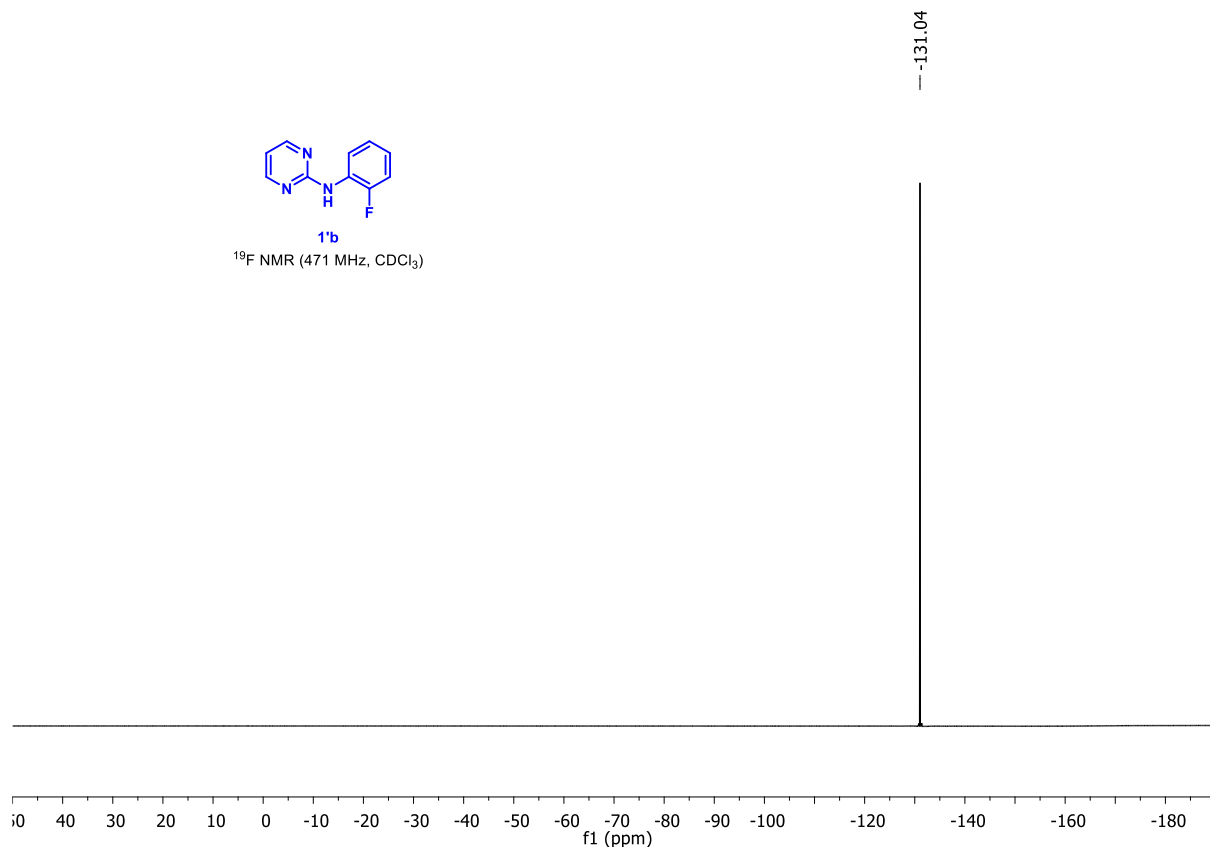



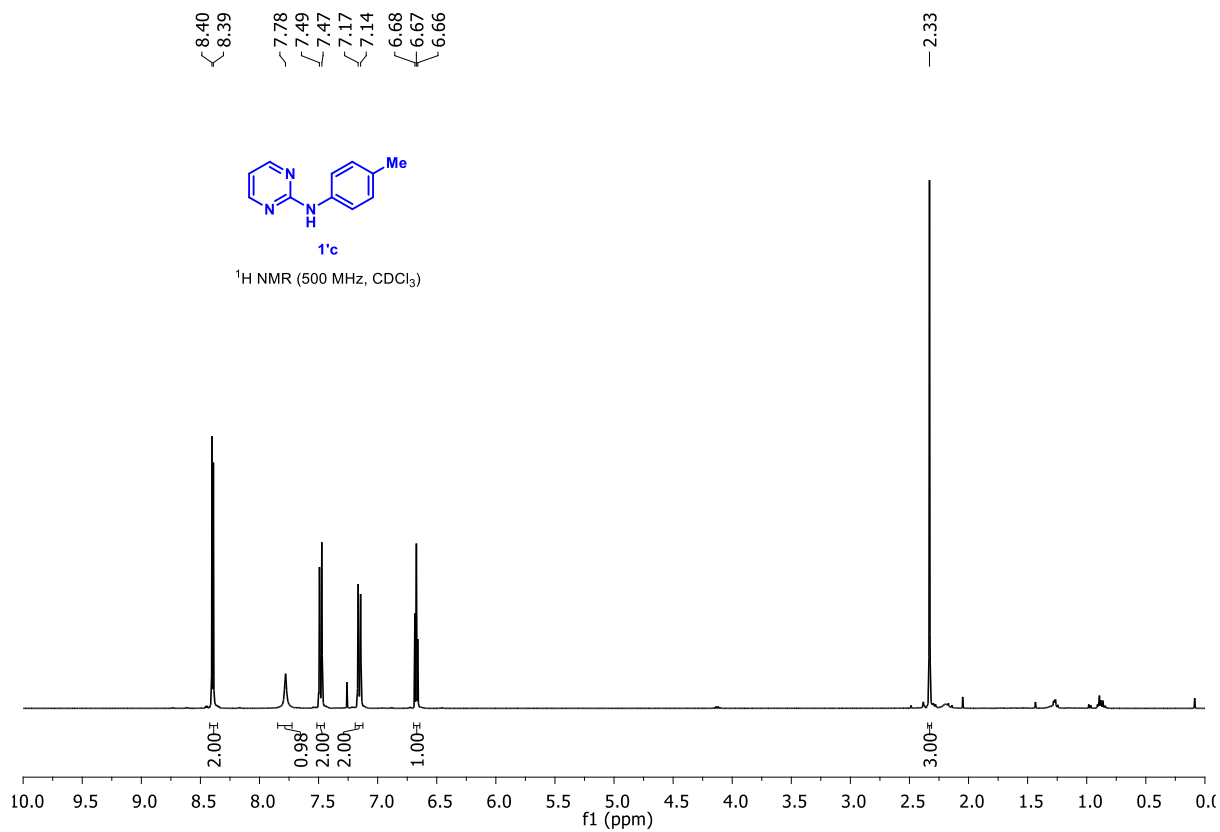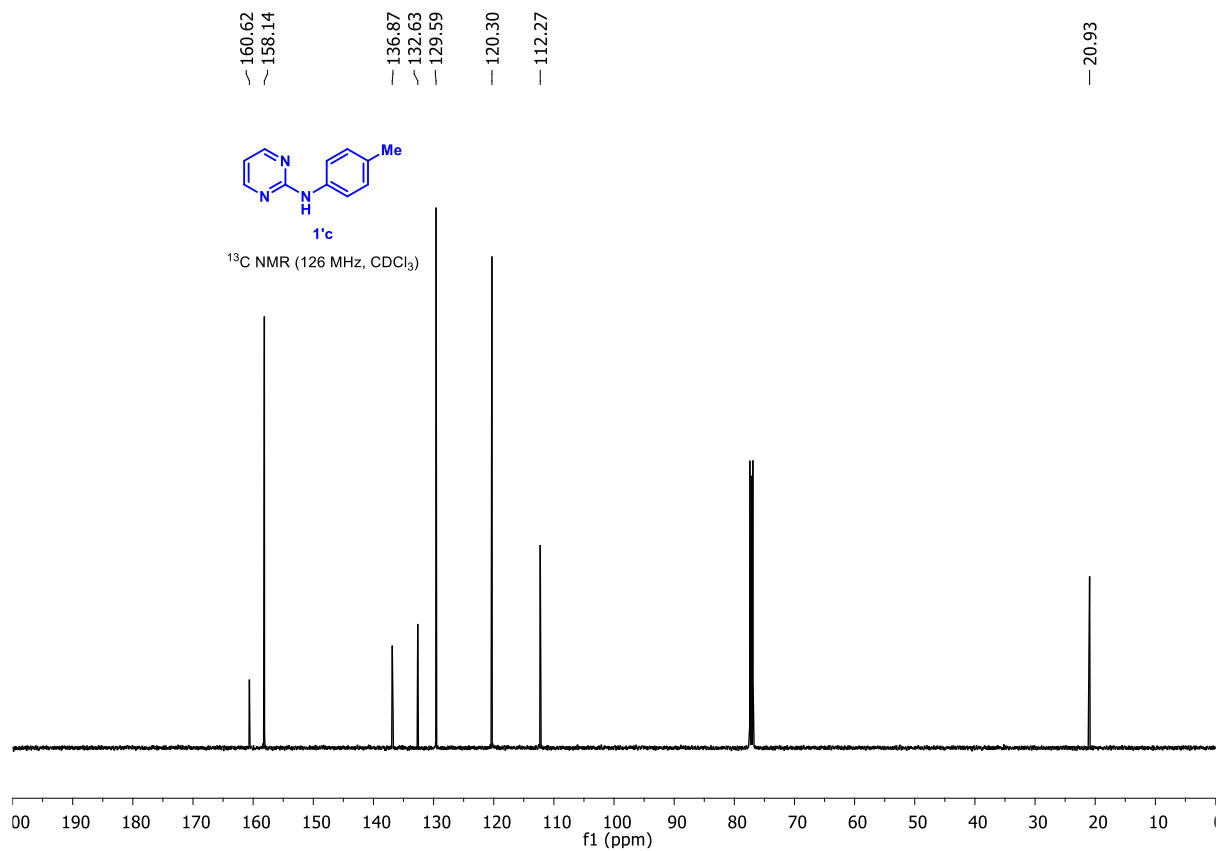

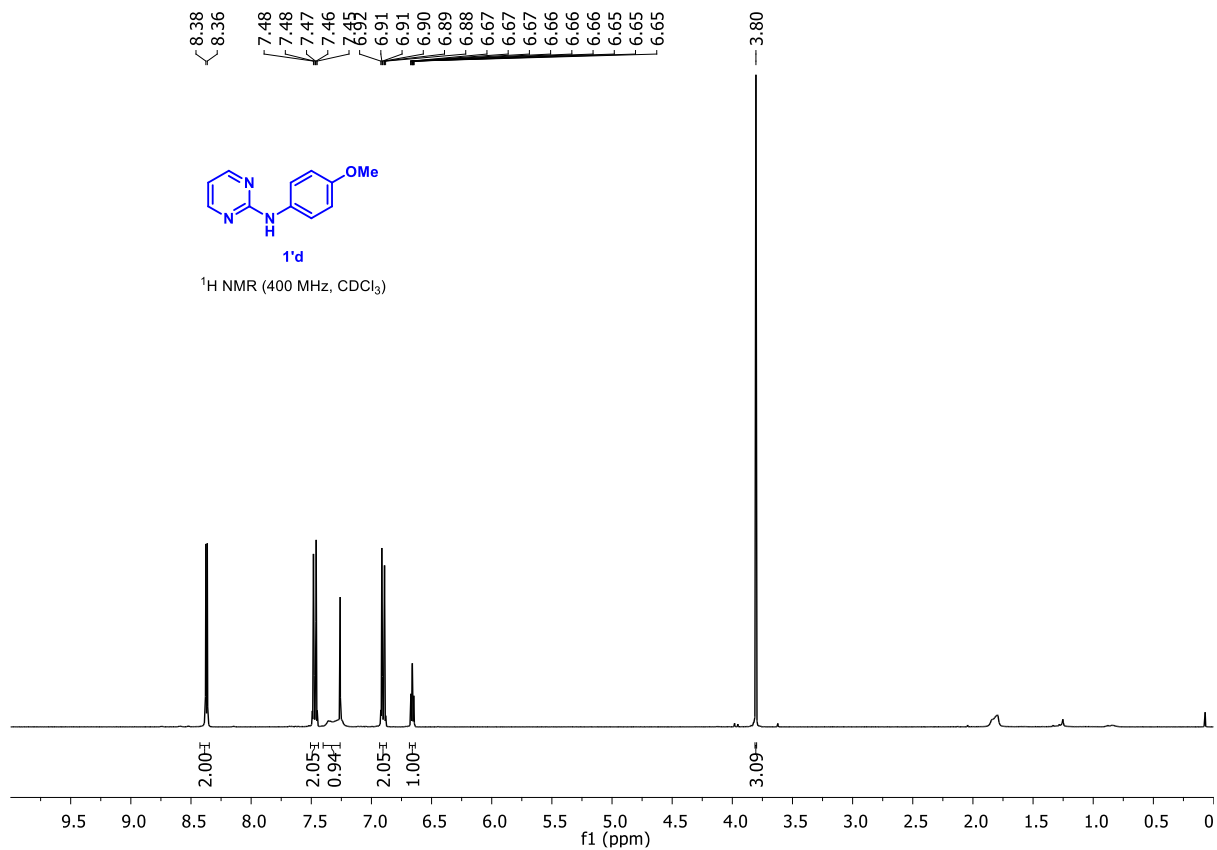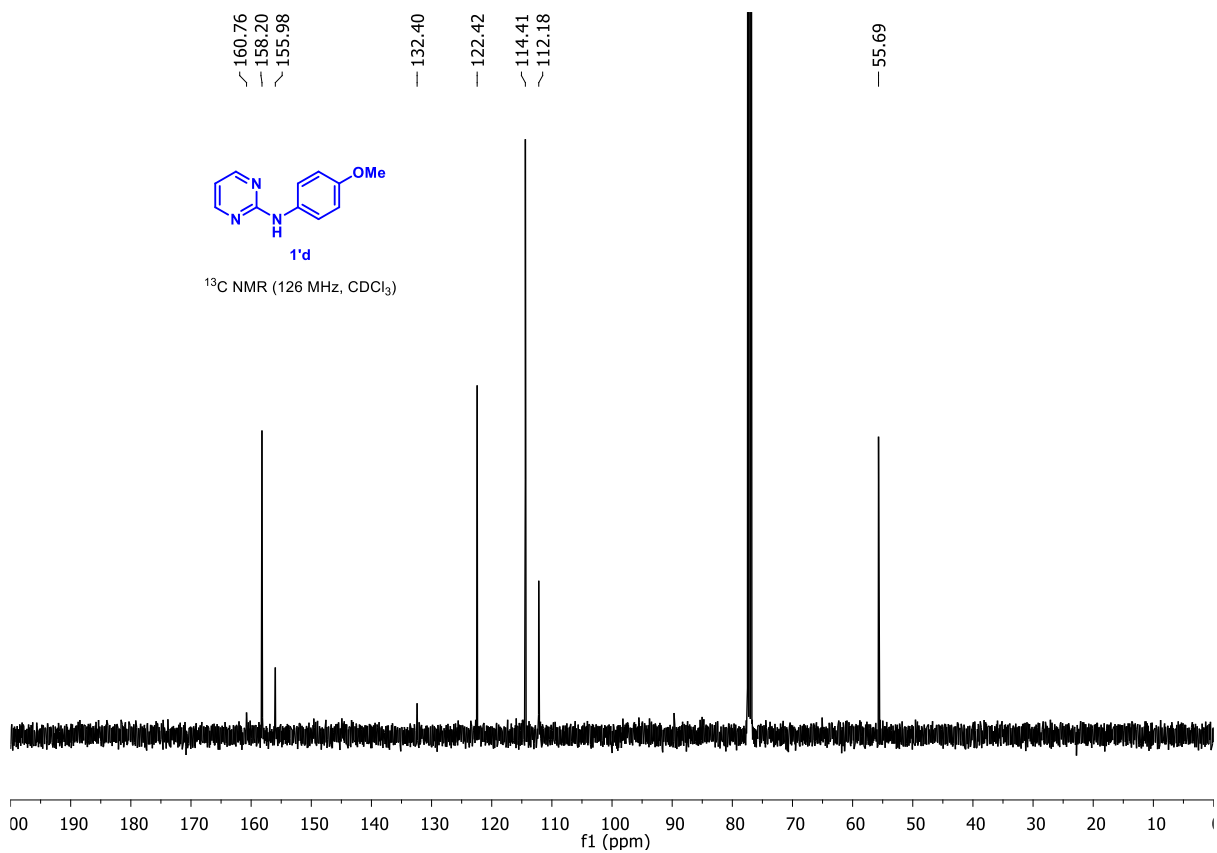

8.48  
8.47  
8.06  
7.78  
7.76  
7.59  
7.57  
6.82  
6.81  
6.80

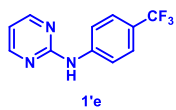

<sup>1</sup>H NMR (400 MHz, CDCl<sub>3</sub>)

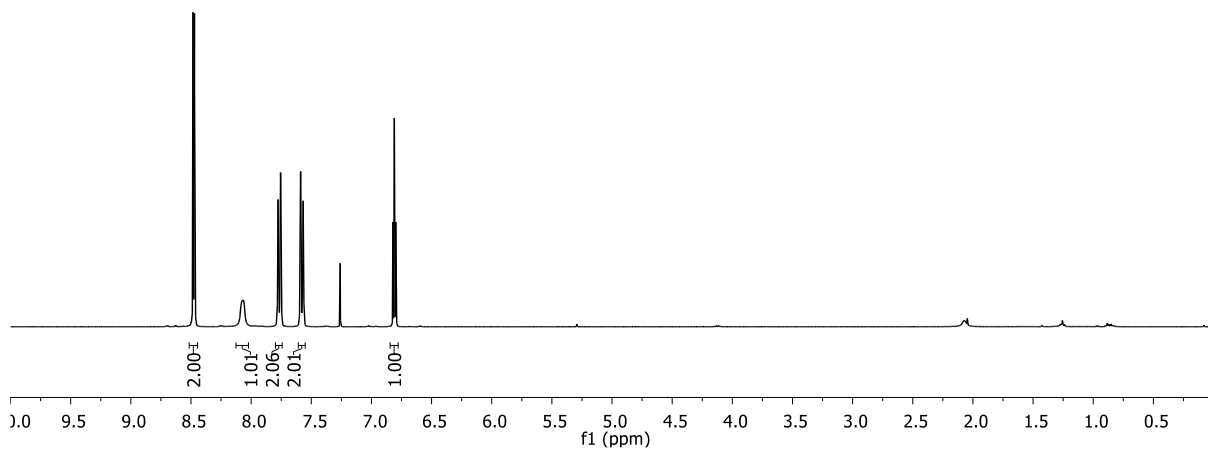

159.90  
158.16  
142.80  
127.77  
126.37  
126.34  
126.31  
126.28  
125.61  
124.57  
124.31  
124.05  
123.79  
123.45  
121.30  
118.71  
113.54

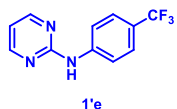

<sup>13</sup>C NMR (126 MHz, CDCl<sub>3</sub>)

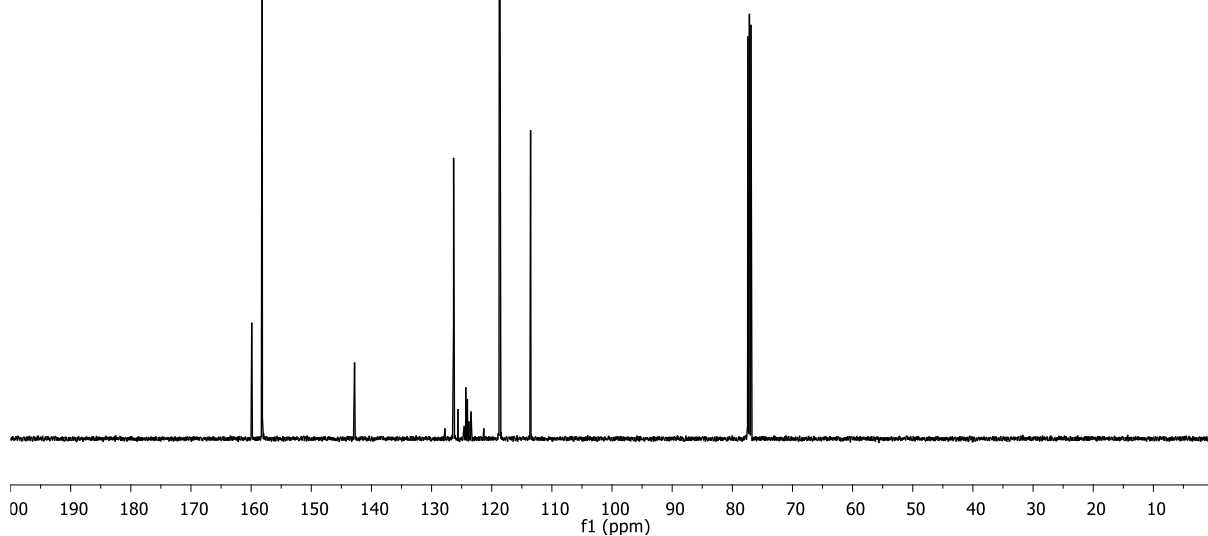

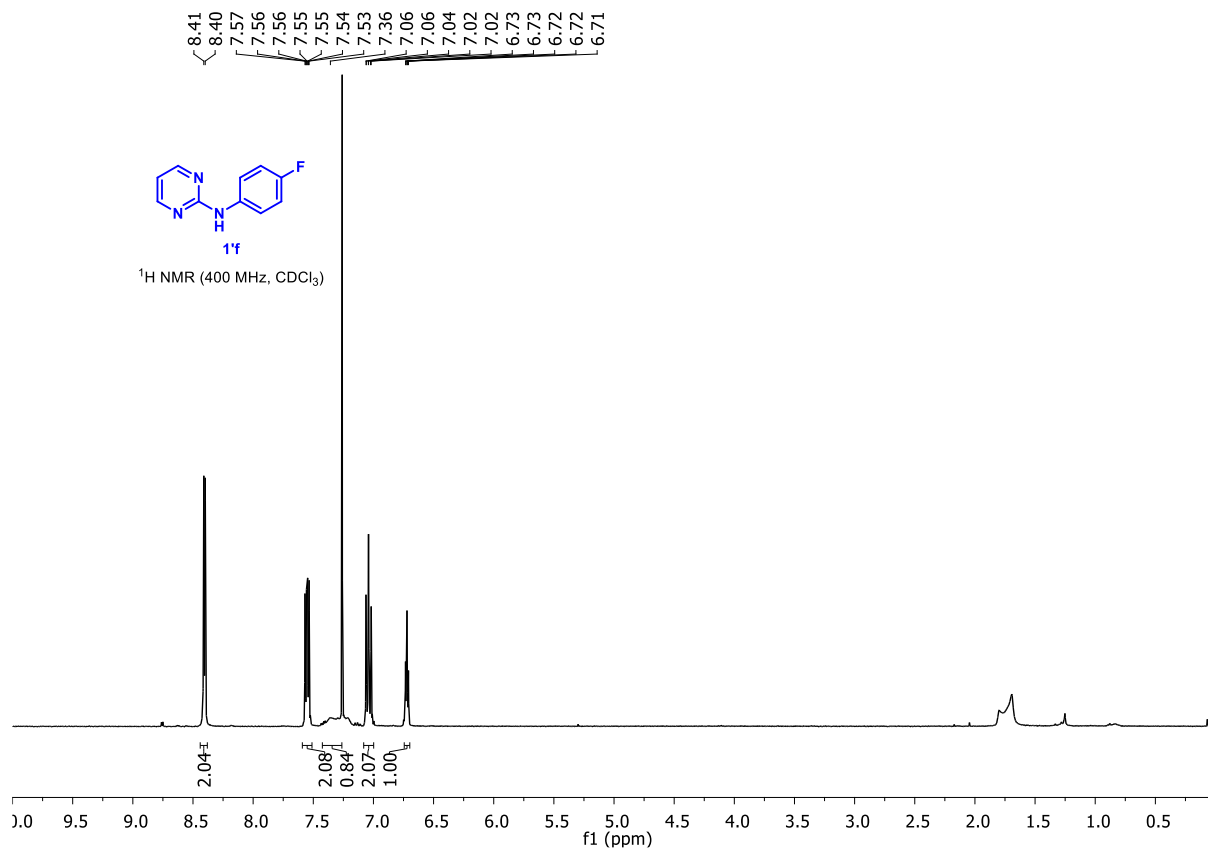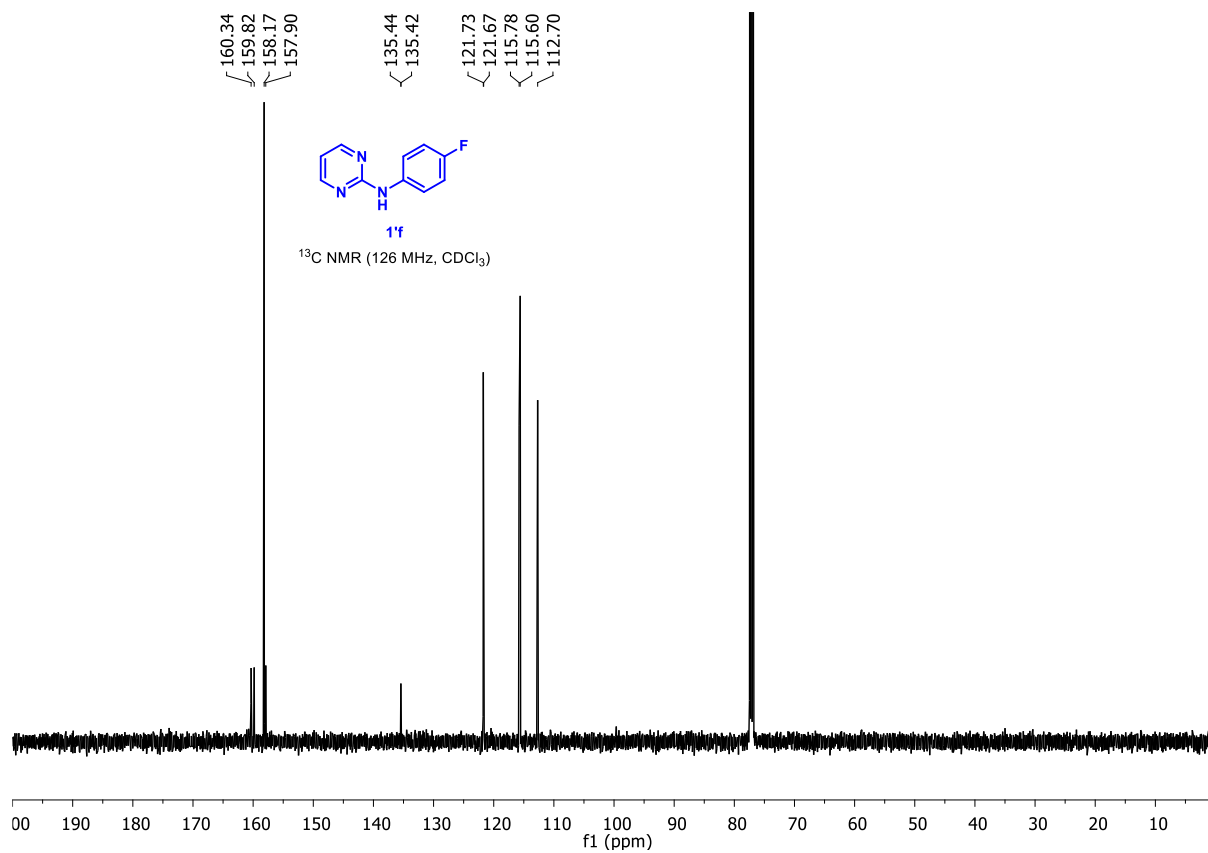

8.49  
8.48  
7.90  
7.89  
7.55  
7.44  
7.43  
7.30  
7.28  
7.06  
7.06  
7.04  
7.04  
6.82  
6.81  
6.80

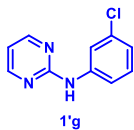

<sup>1</sup>H NMR (500 MHz, CDCl<sub>3</sub>)

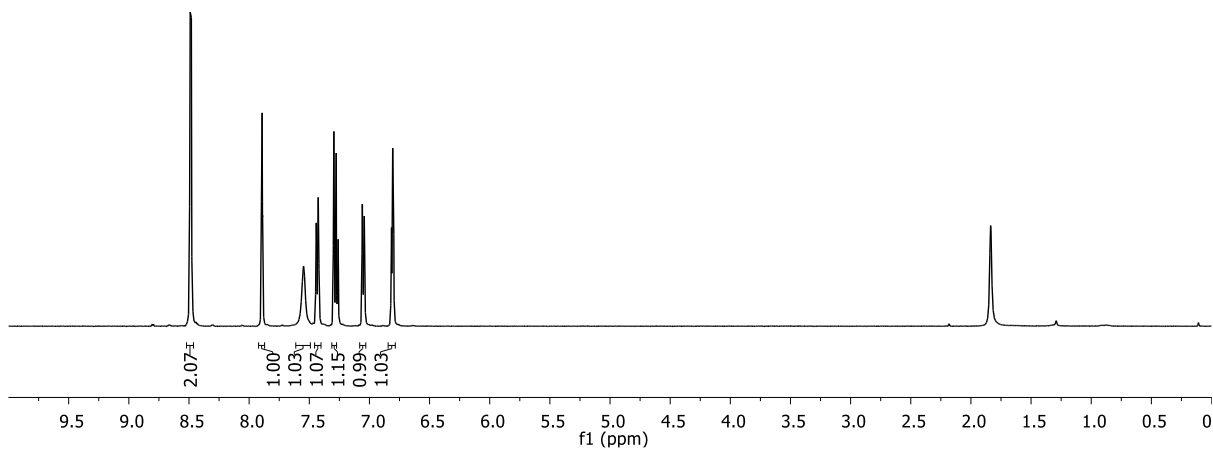

159.91  
158.13  
140.80  
134.75  
129.98  
122.65  
119.30  
117.36  
113.20

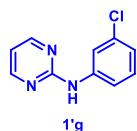

<sup>13</sup>C NMR (126 MHz, CDCl<sub>3</sub>)

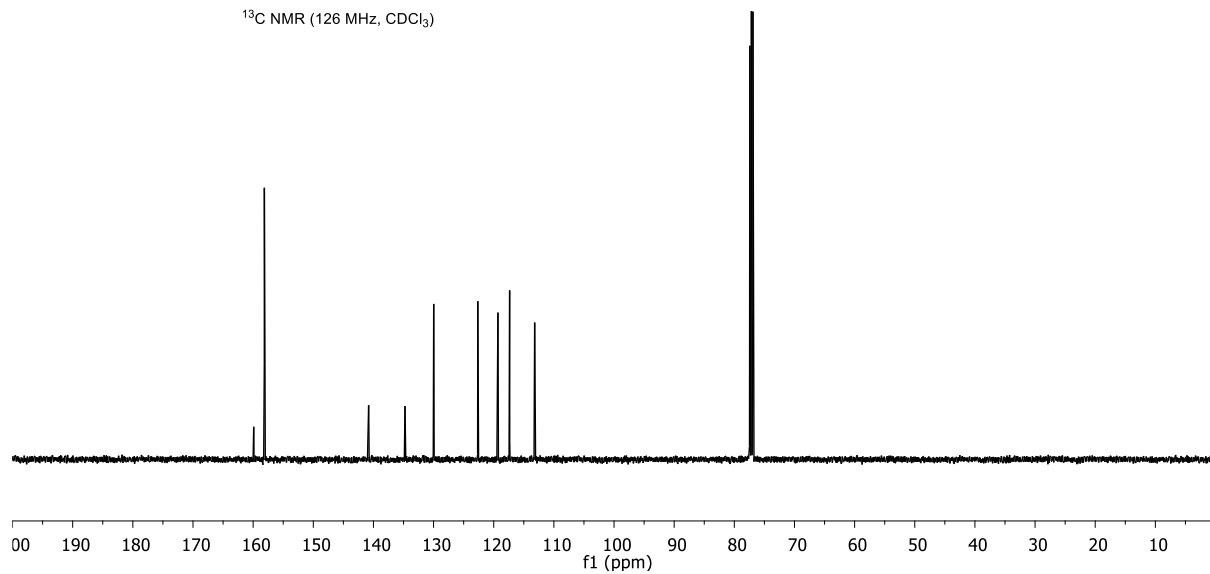

8.45  
8.44  
7.99  
7.47  
7.45  
7.18  
7.17  
6.78  
6.77  
6.76

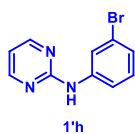

<sup>1</sup>H NMR (500 MHz, CDCl<sub>3</sub>)

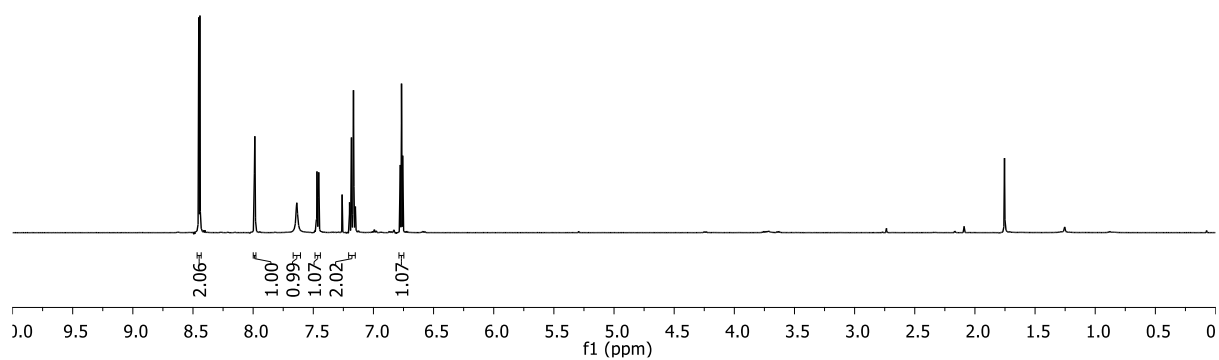

159.95  
158.14  
141.00  
130.26  
125.53  
122.81  
122.16  
117.85  
113.20

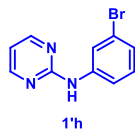

<sup>13</sup>C NMR (126 MHz, CDCl<sub>3</sub>)

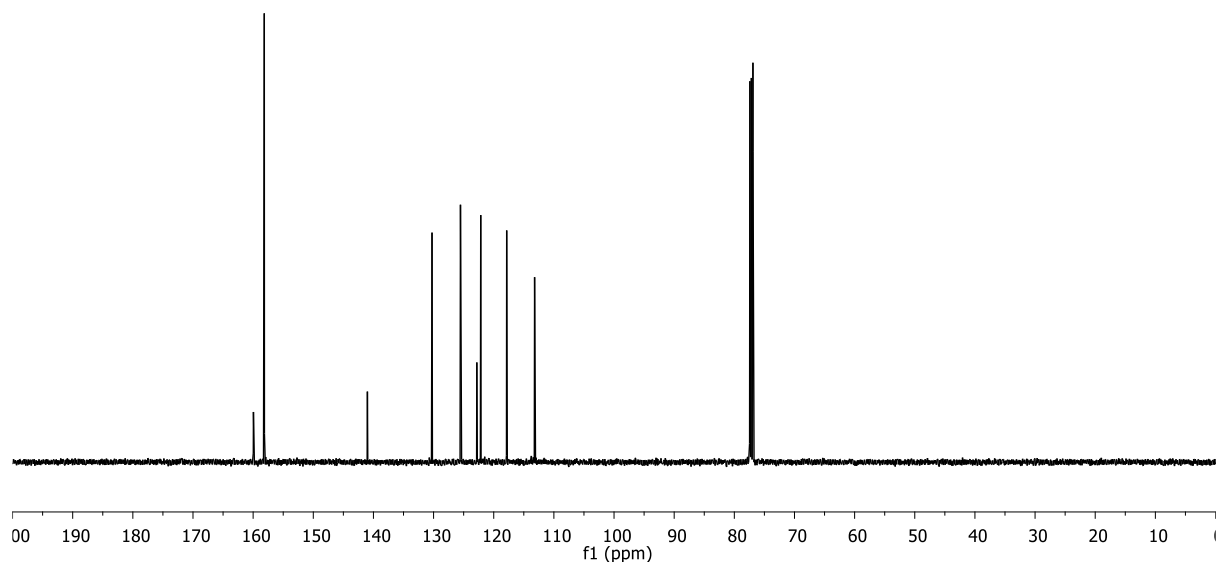

8.45  
8.44  
7.64  
7.63  
7.62  
7.62  
7.45  
7.44  
6.75  
6.74  
6.73

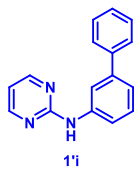

<sup>1</sup>H NMR (500 MHz, CDCl<sub>3</sub>)

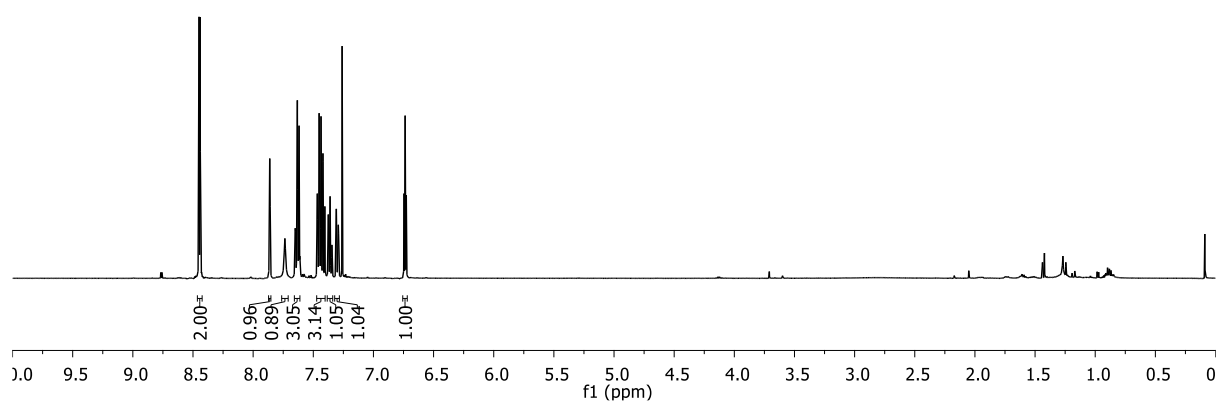

160.12  
158.08  
142.25  
141.25  
139.77  
129.43  
128.85  
127.49  
127.37  
121.96  
118.75  
118.65  
112.64

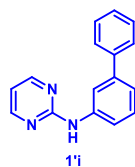

<sup>13</sup>C NMR (126 MHz, CDCl<sub>3</sub>)

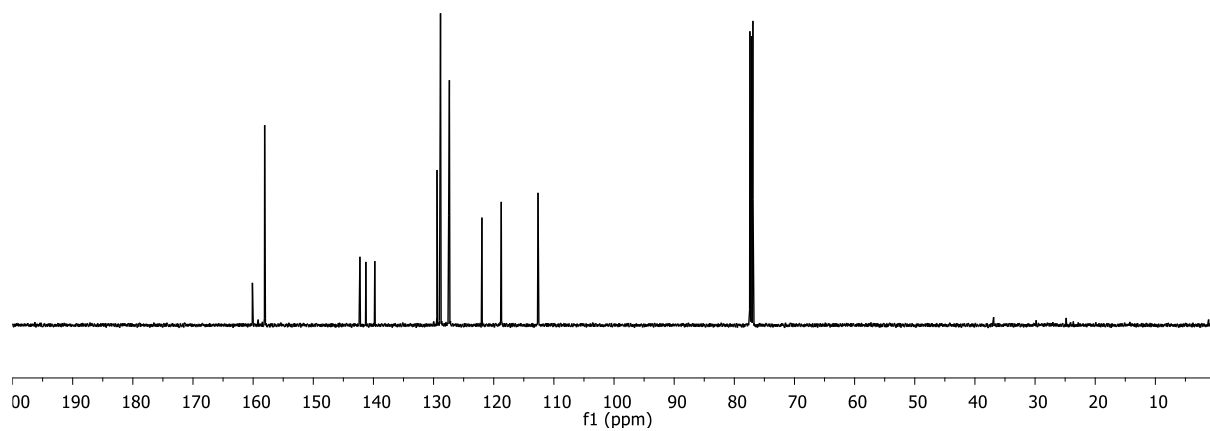

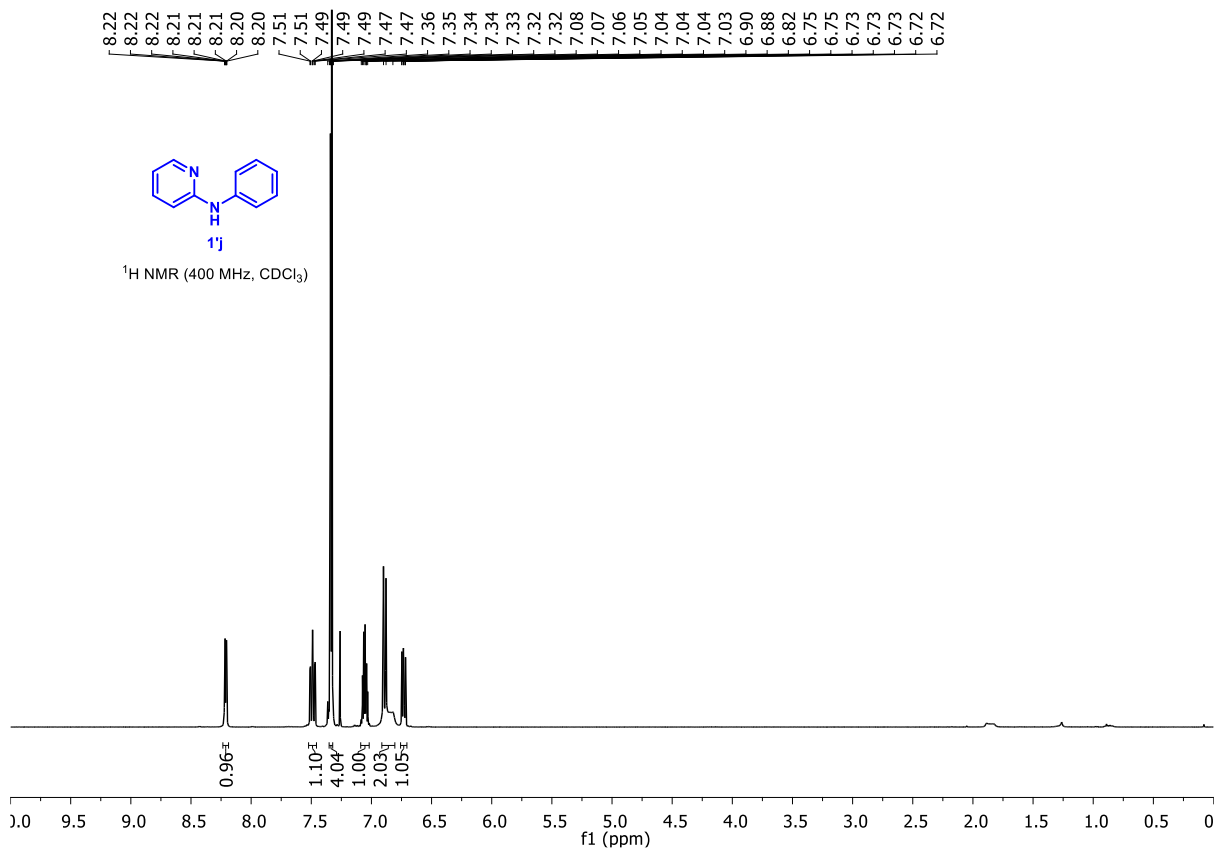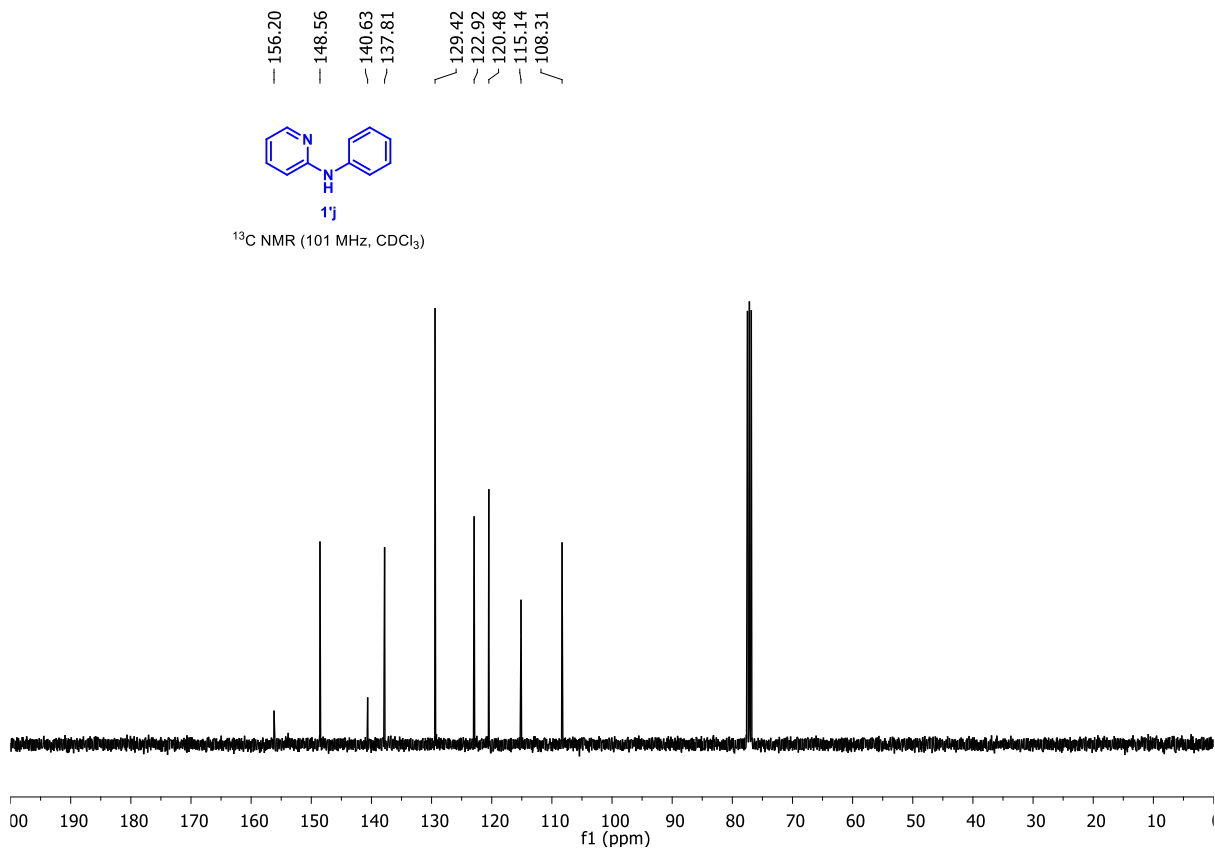



8.41  
8.40  
— 7.95  
7.52  
7.51  
7.20  
7.18  
6.68  
6.66

2.66  
2.64  
2.63  
2.61

1.26  
1.24  
1.23

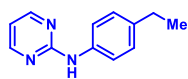

1'k

<sup>1</sup>H NMR (500 MHz, CDCl<sub>3</sub>)

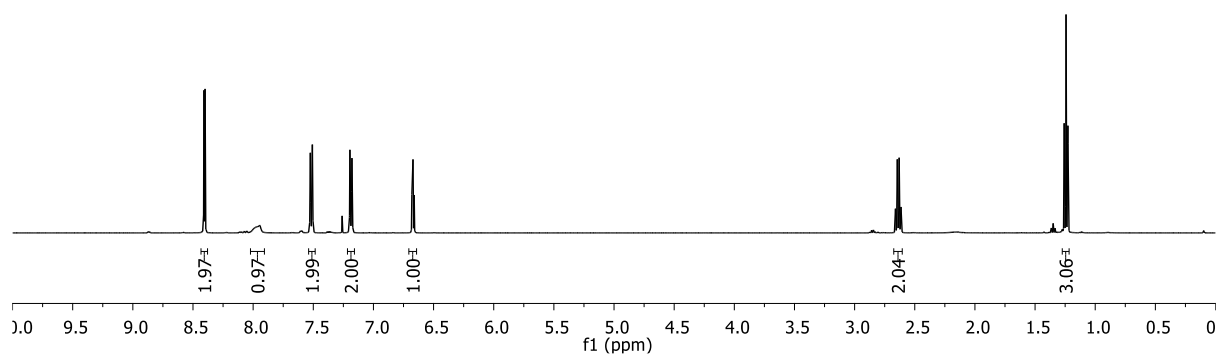

160.60  
158.10

139.05  
137.08

128.37

120.36

112.18

28.37

15.81

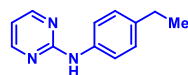

1'k

<sup>13</sup>C NMR (126 MHz, CDCl<sub>3</sub>)

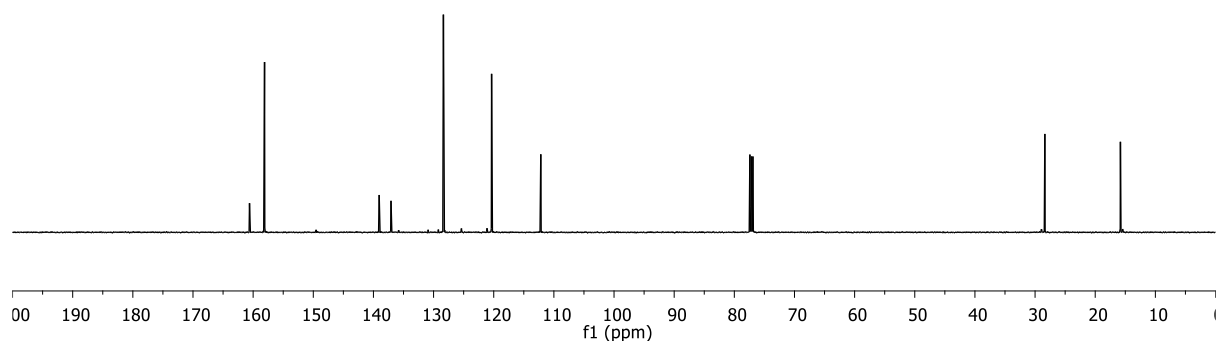

7.44  
7.43  
7.40  
7.40  
7.39  
7.37  
7.37  
7.35  
6.79  
6.78  
6.77  
6.76  
6.75  
6.74  
6.74  
6.72  
— 5.26

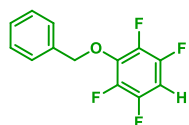

2f

<sup>1</sup>H NMR (500 MHz, CDCl<sub>3</sub>)

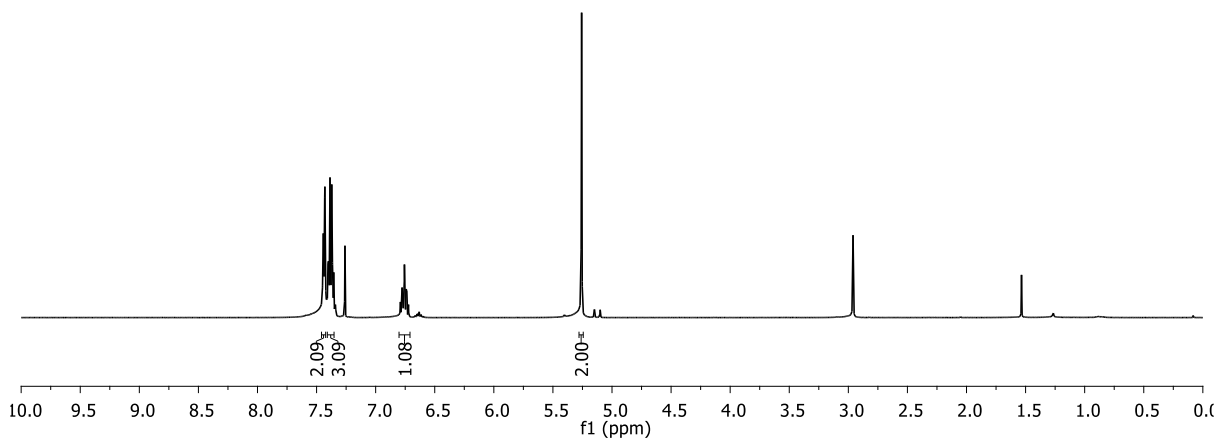

147.78  
147.74  
147.66  
147.62  
147.53  
147.49  
145.33  
145.29  
145.20  
145.16  
145.08  
142.81  
142.78  
142.77  
142.63  
142.62  
140.32  
140.31  
140.17  
140.17  
140.13  
137.64  
135.71  
128.97  
128.76  
108.18  
108.18  
99.91  
99.68  
  
76.51  
76.48  
76.44

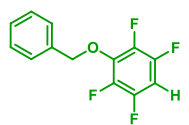

2f

<sup>13</sup>C NMR (101 MHz, CDCl<sub>3</sub>)

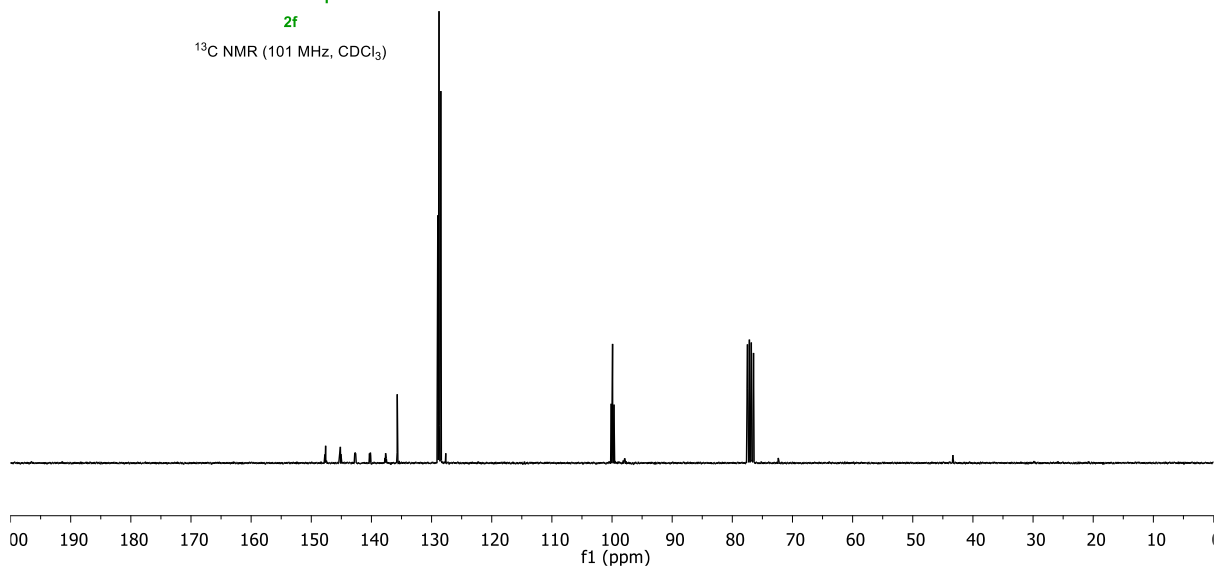

7.72  
7.68  
7.13  
7.11  
7.10  
7.09  
7.08  
7.07  
7.06  
7.04  
6.80  
6.76

4.32  
4.31  
4.29  
4.27

1.37  
1.35  
1.33

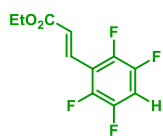

2i

<sup>1</sup>H NMR (400 MHz, CDCl<sub>3</sub>)

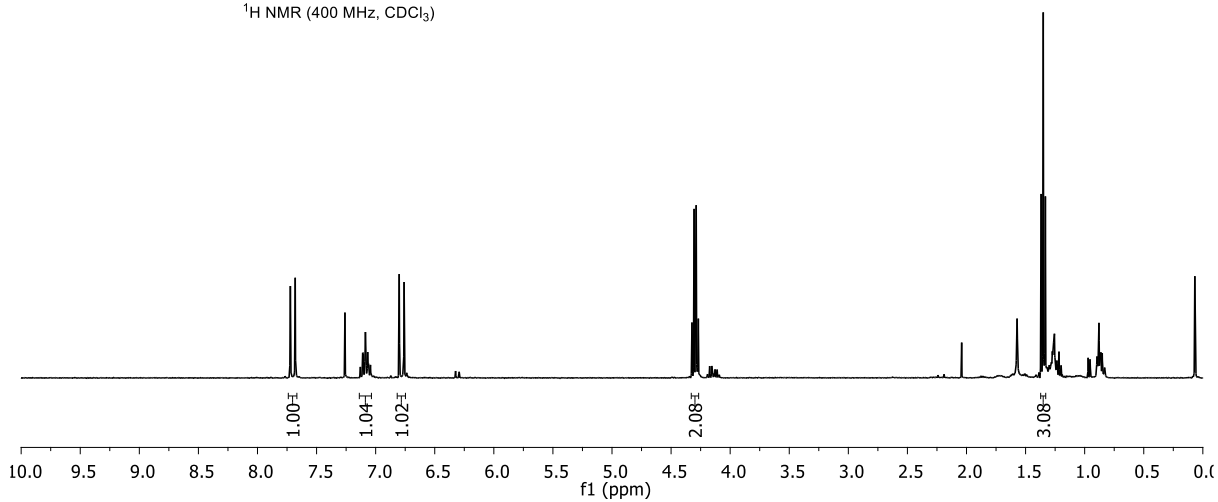

166.25  
147.43  
147.39  
146.59  
146.45  
144.92  
144.88  
144.06  
139.26  
126.97  
126.88  
126.80

107.16  
106.93  
106.70

61.24

14.37

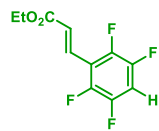

2i

<sup>13</sup>C NMR (101 MHz, CDCl<sub>3</sub>)

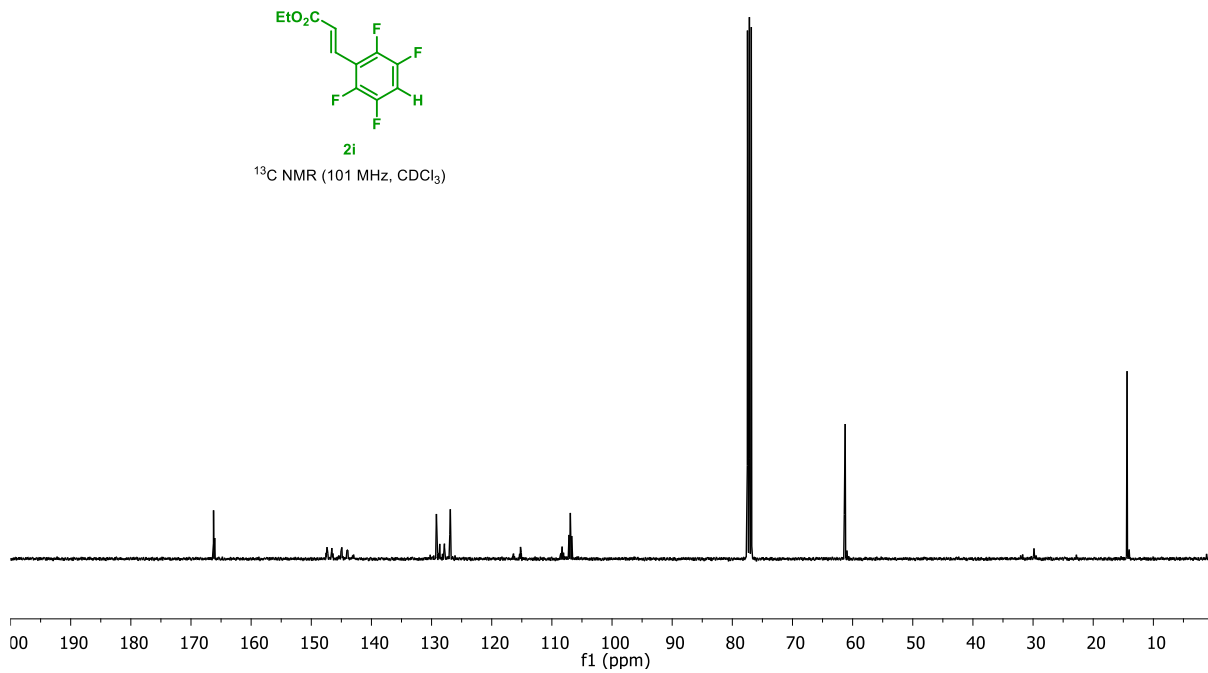

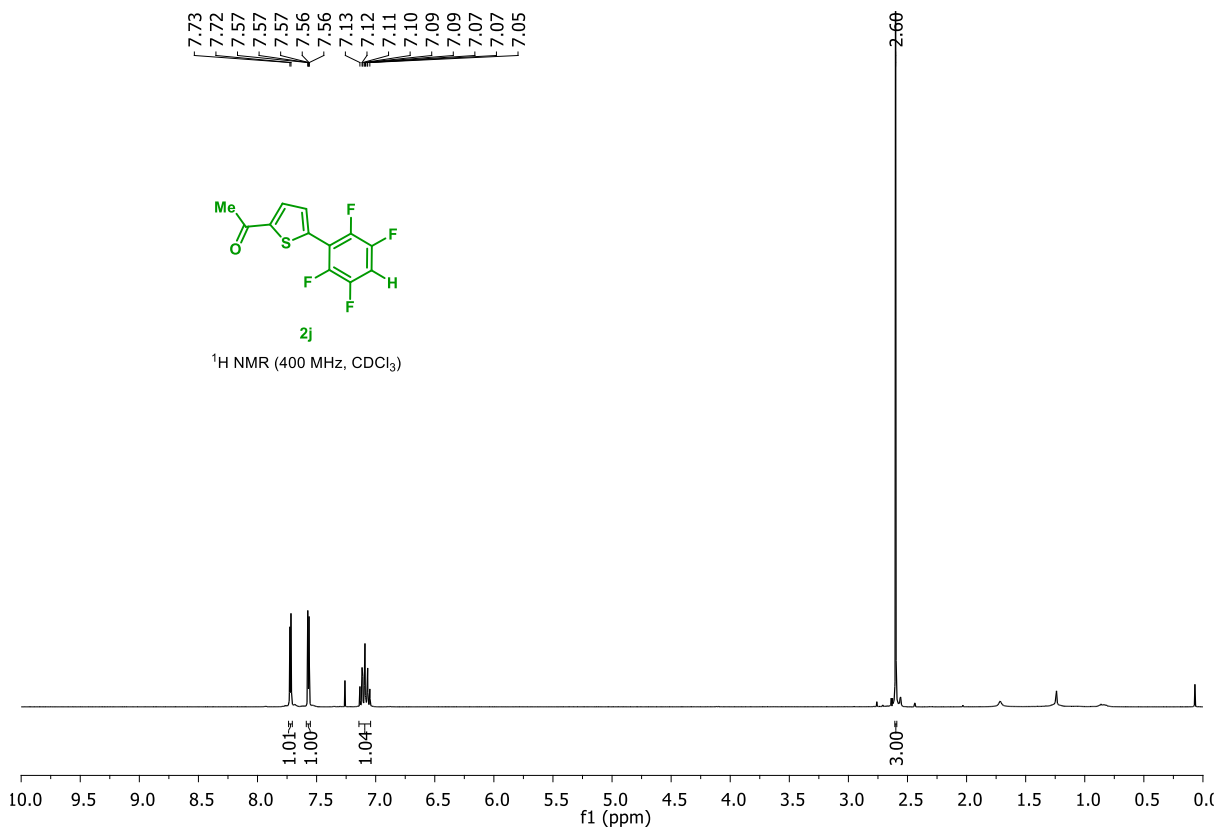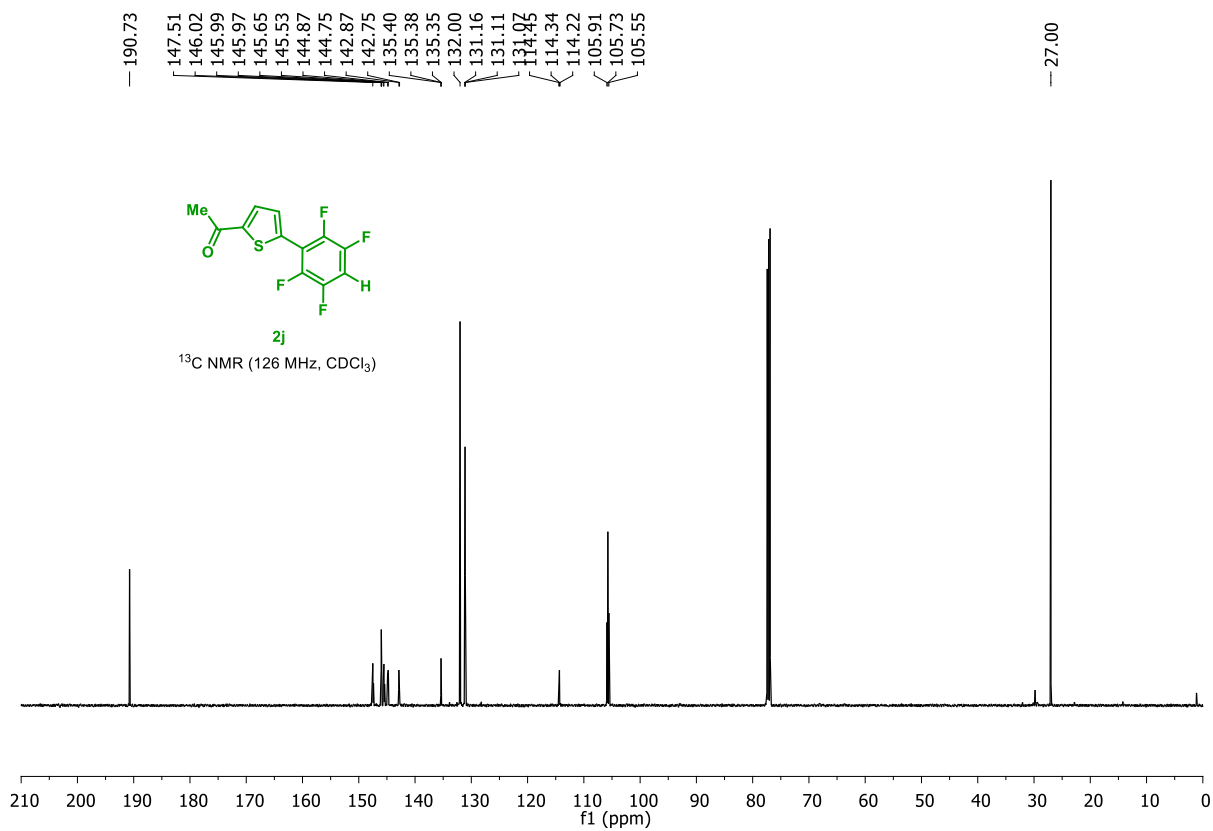

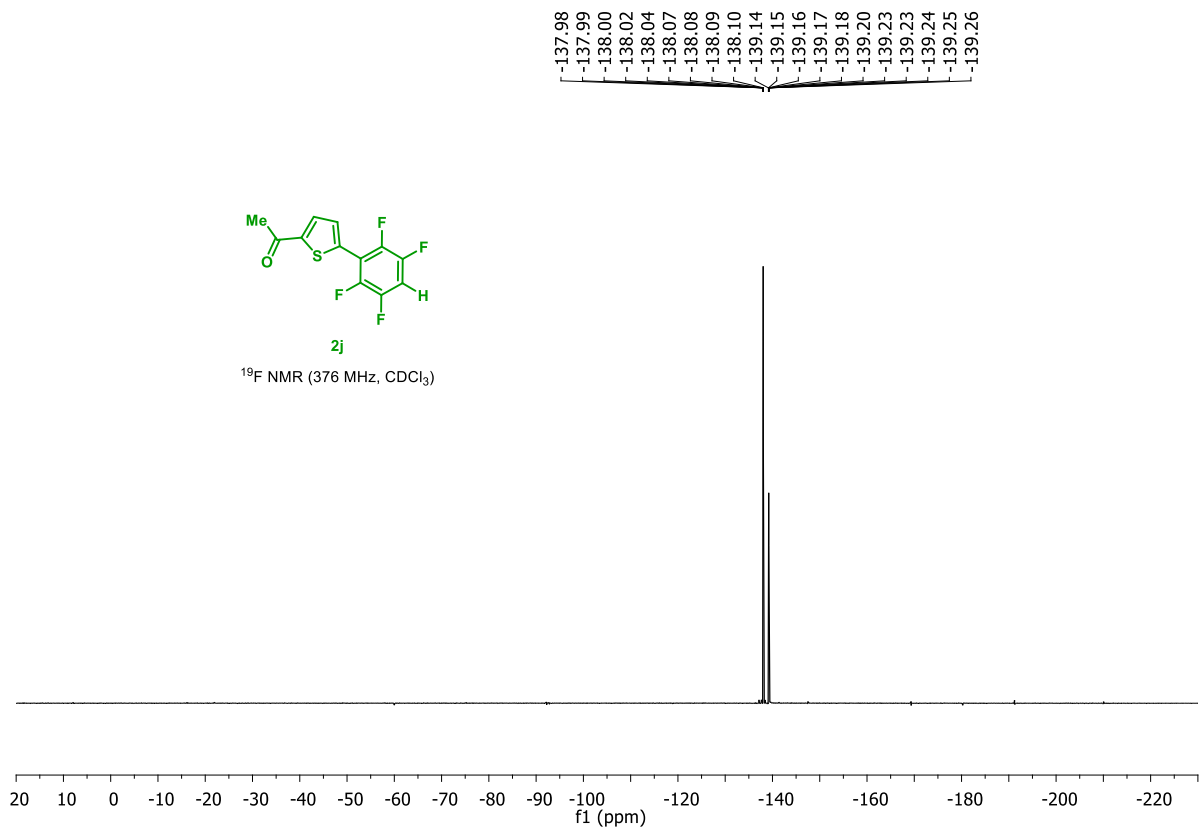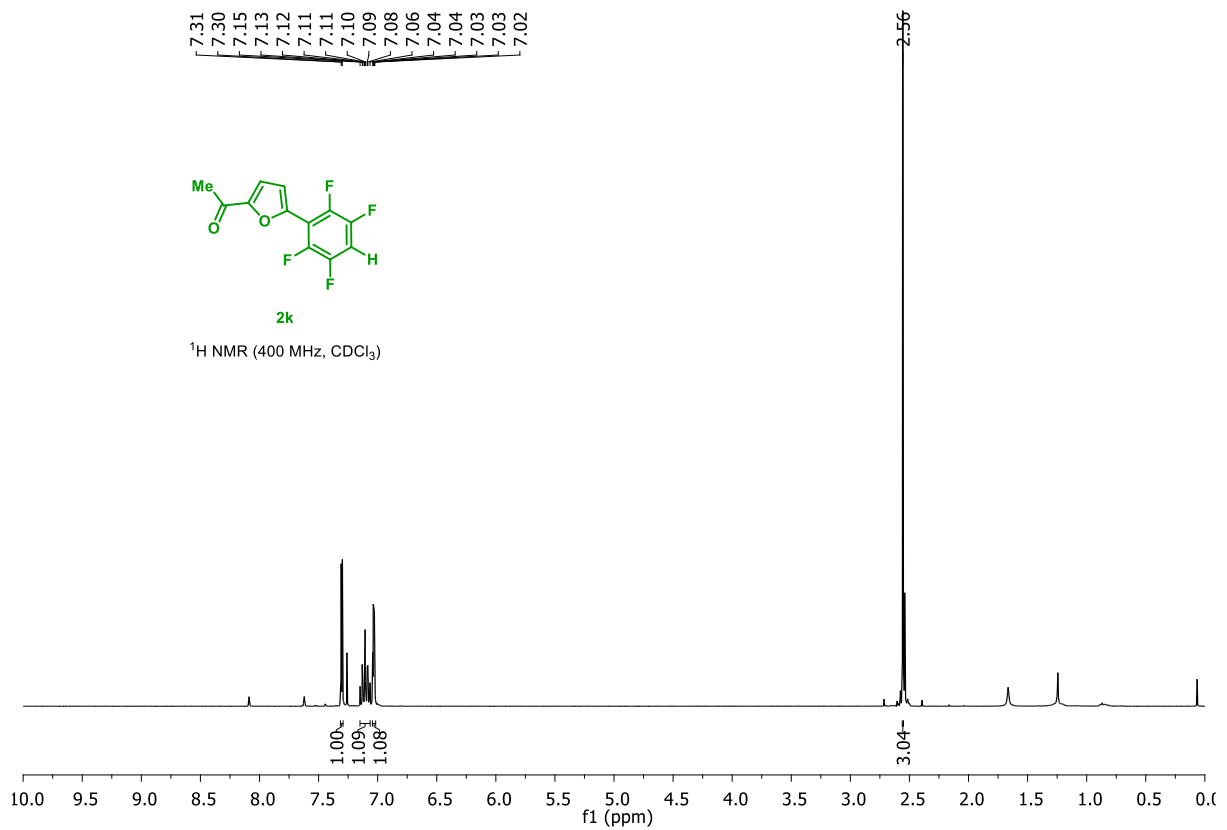

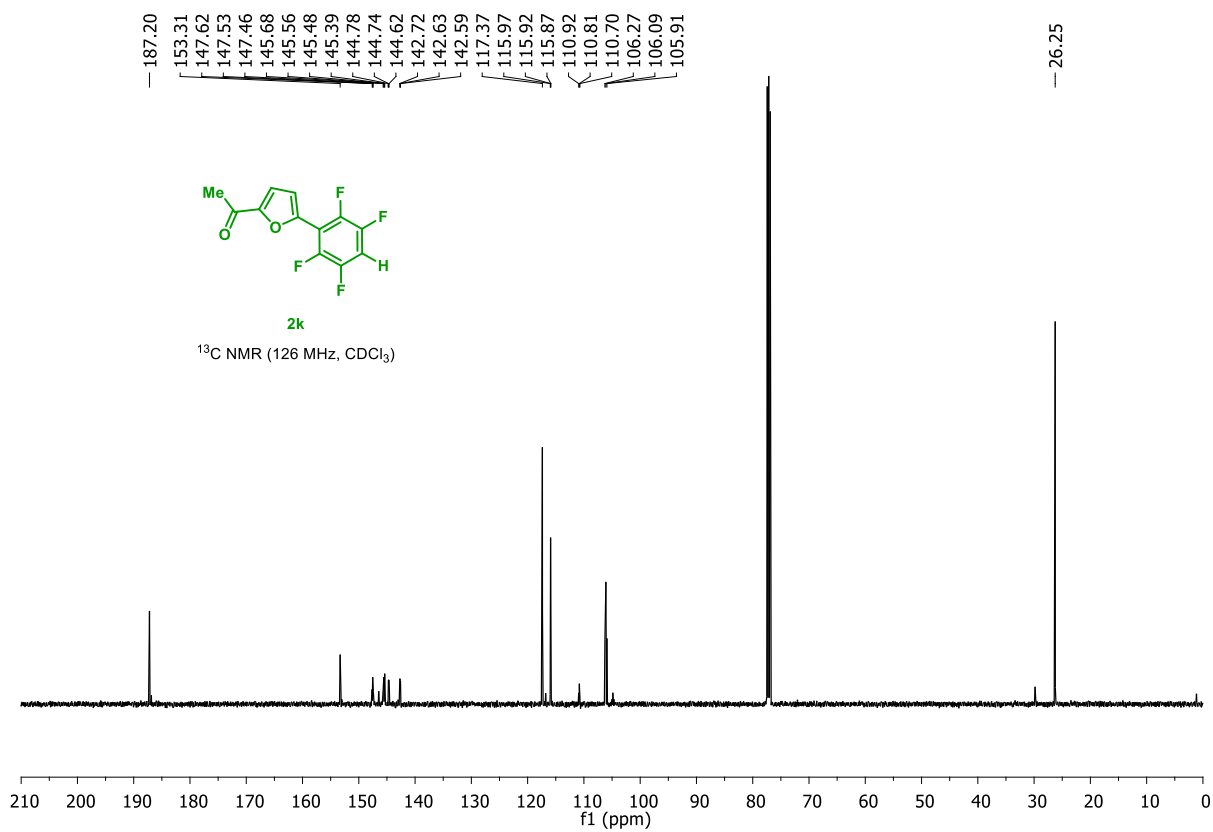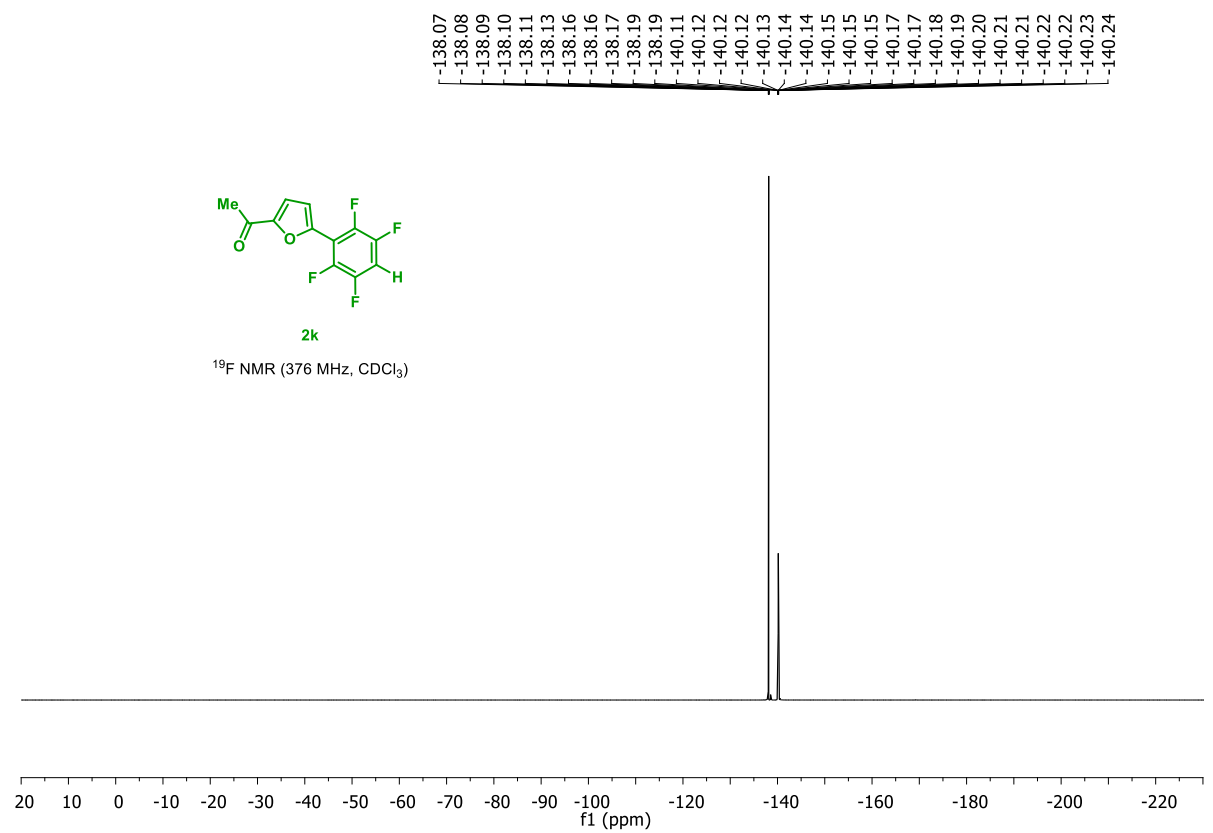

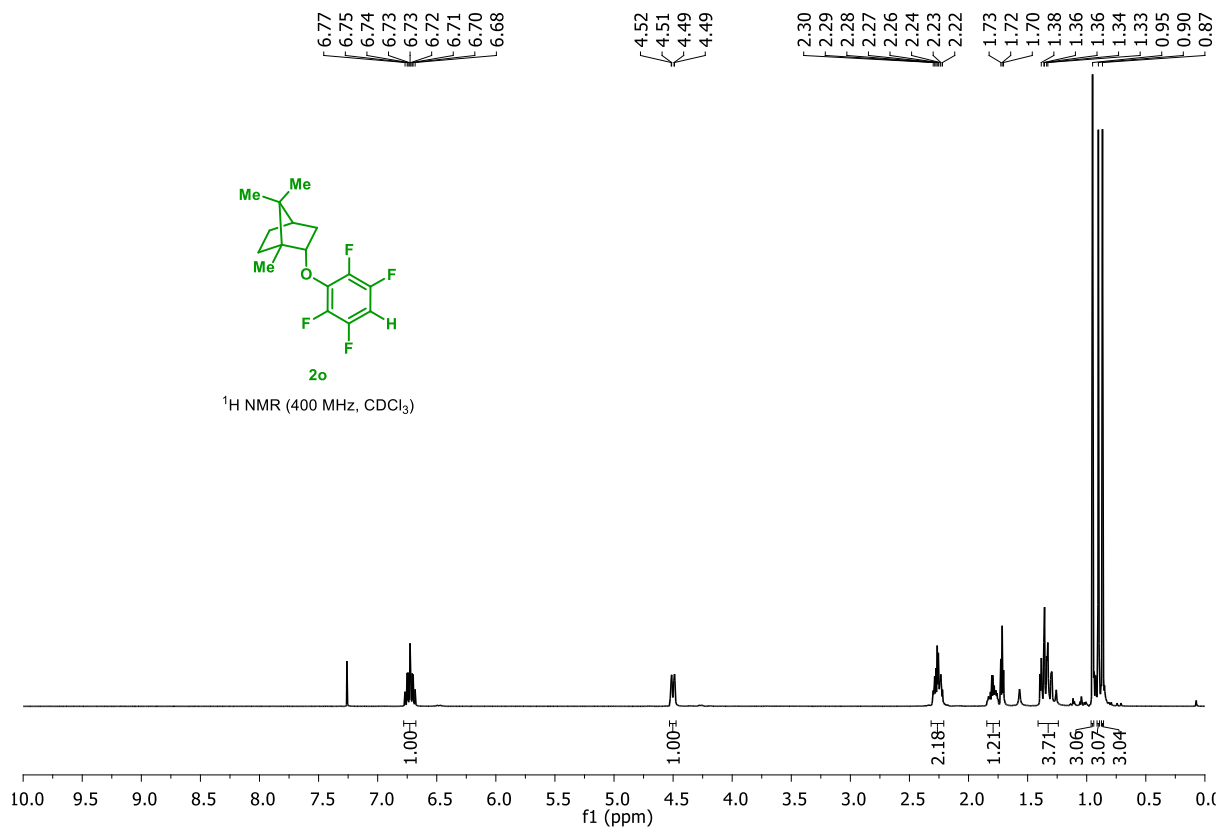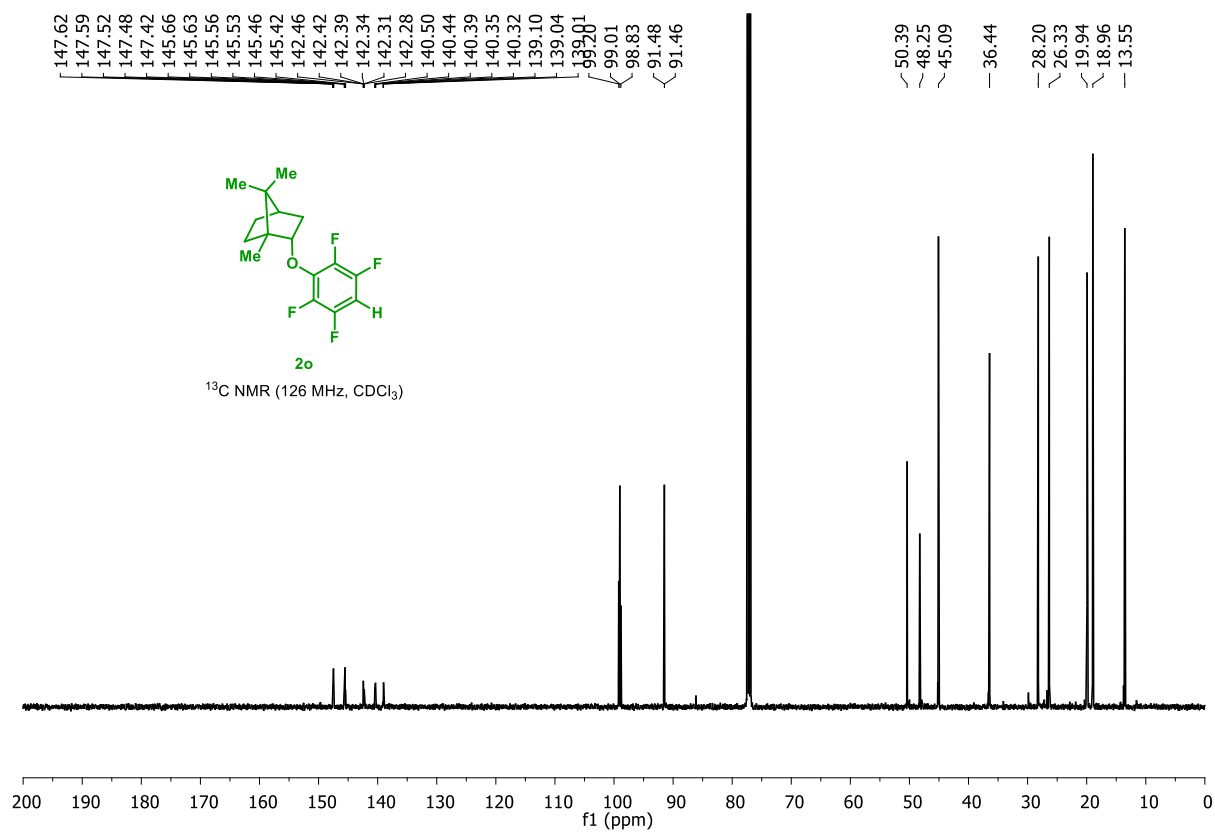

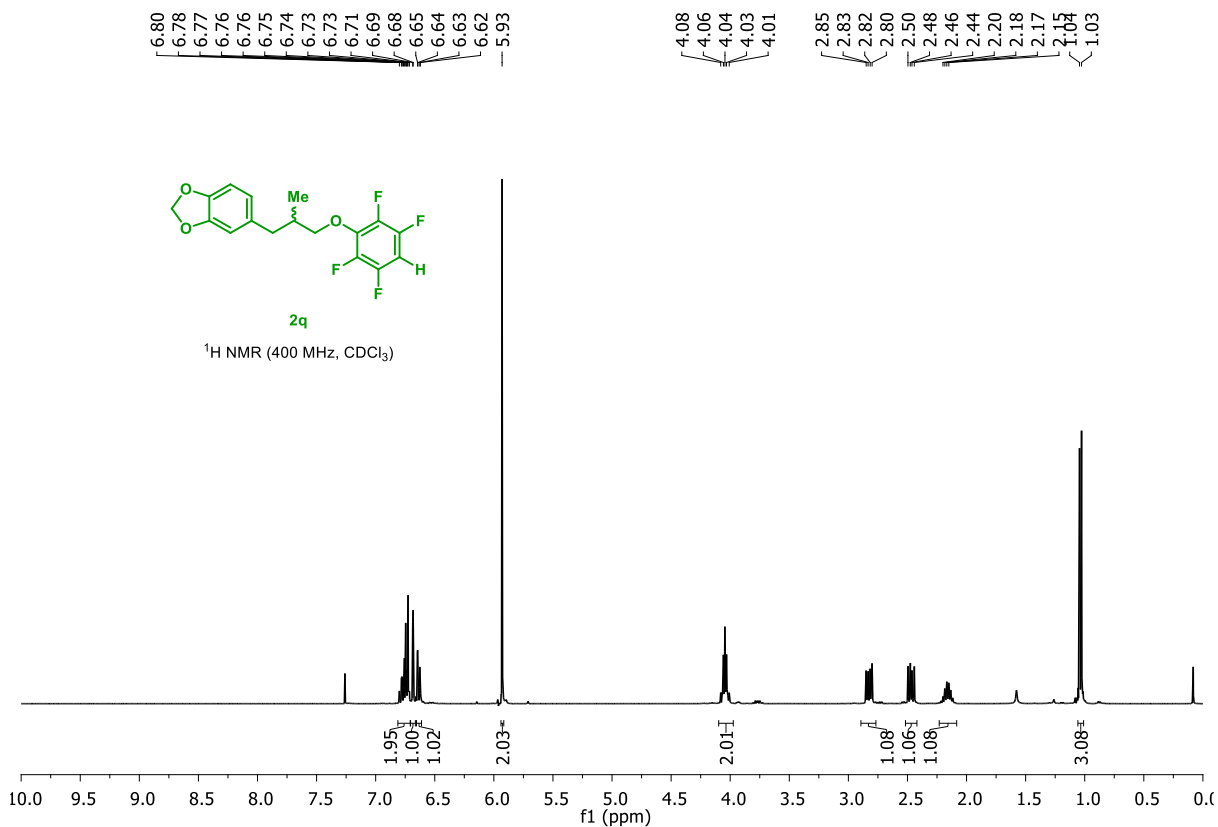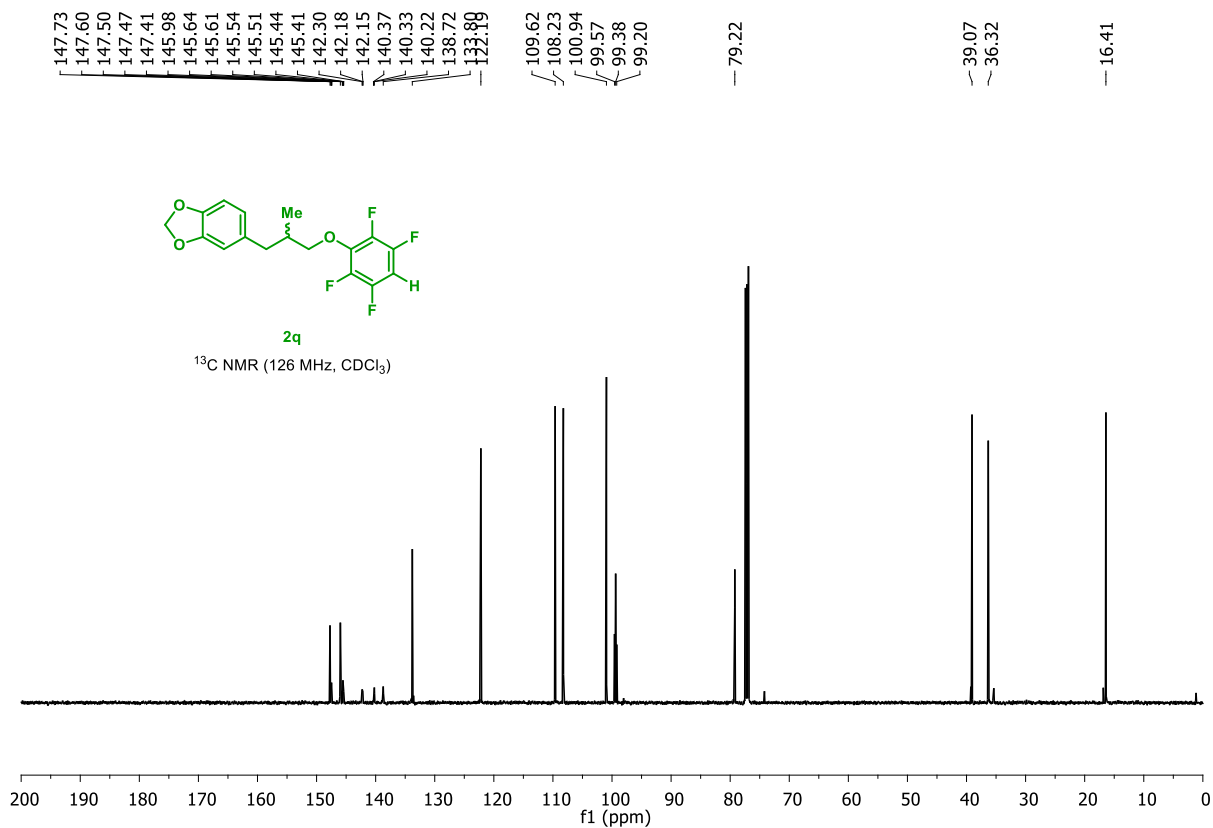



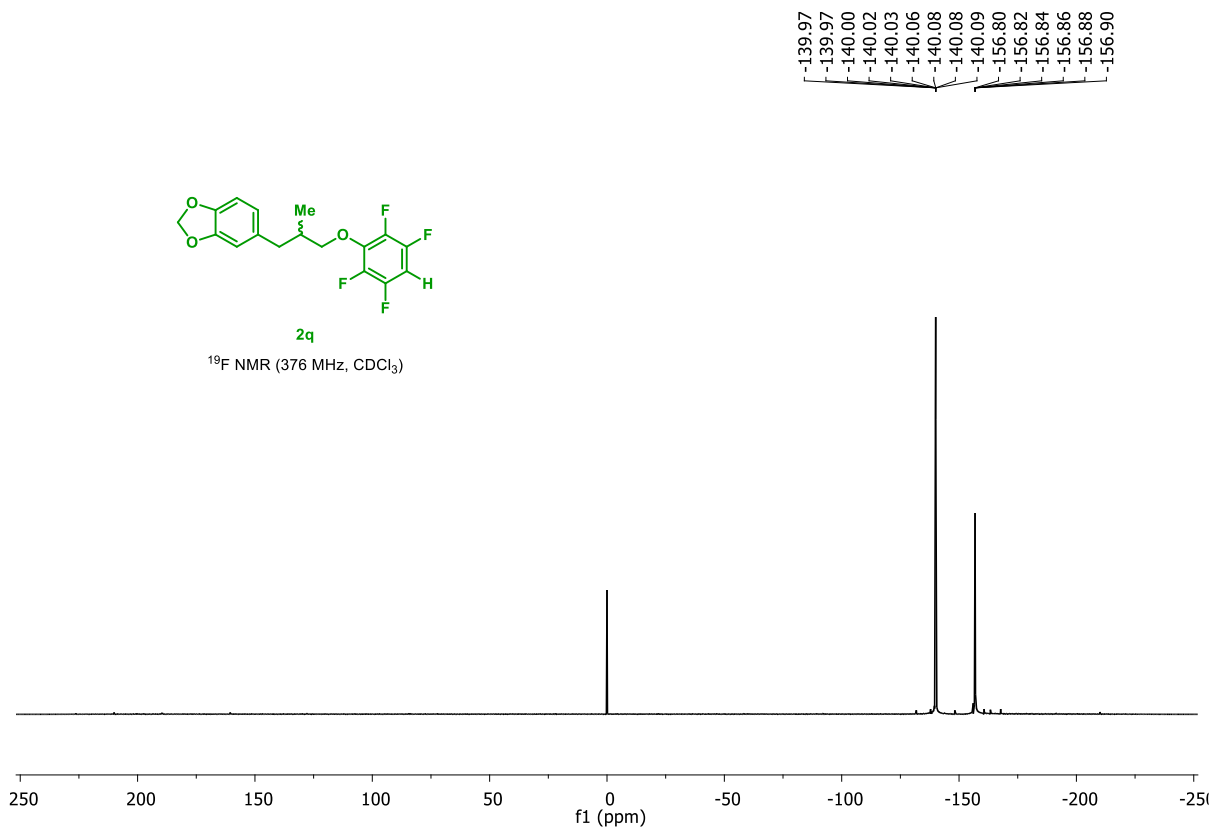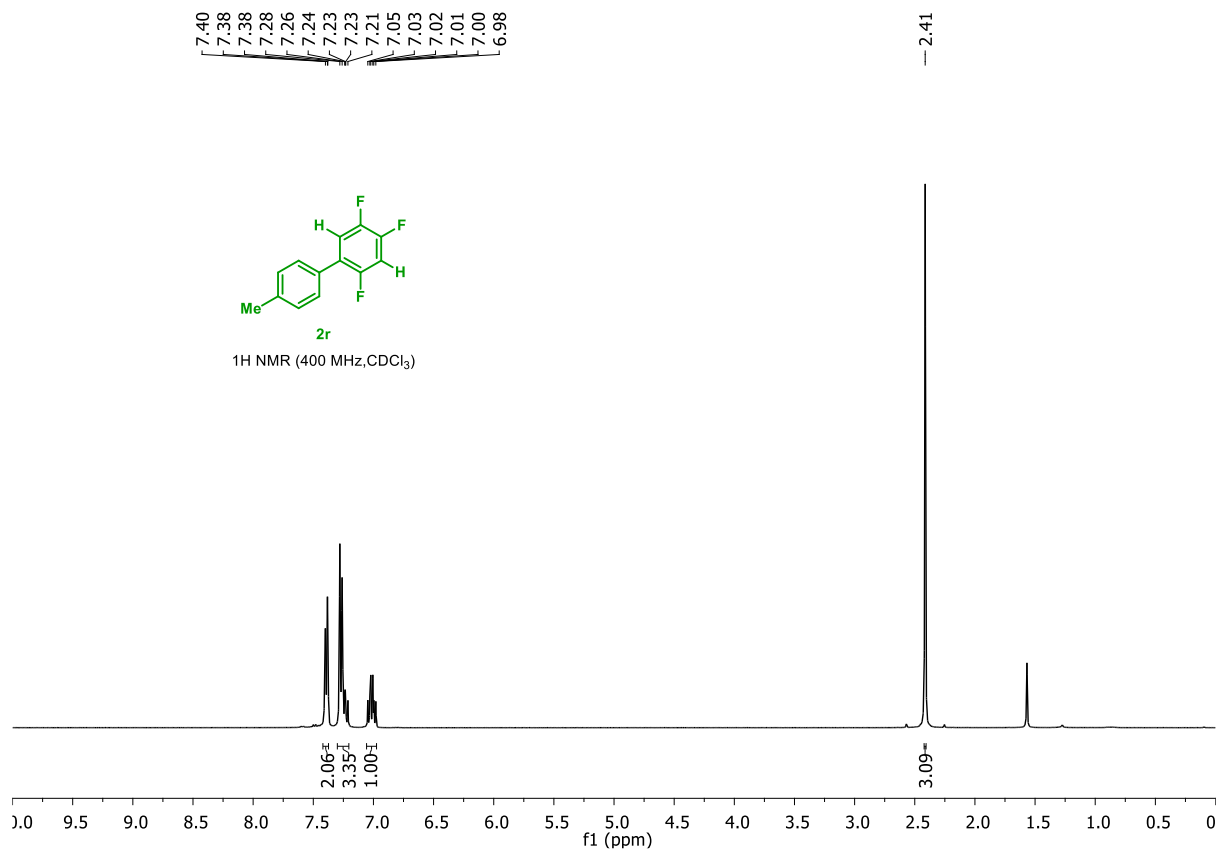

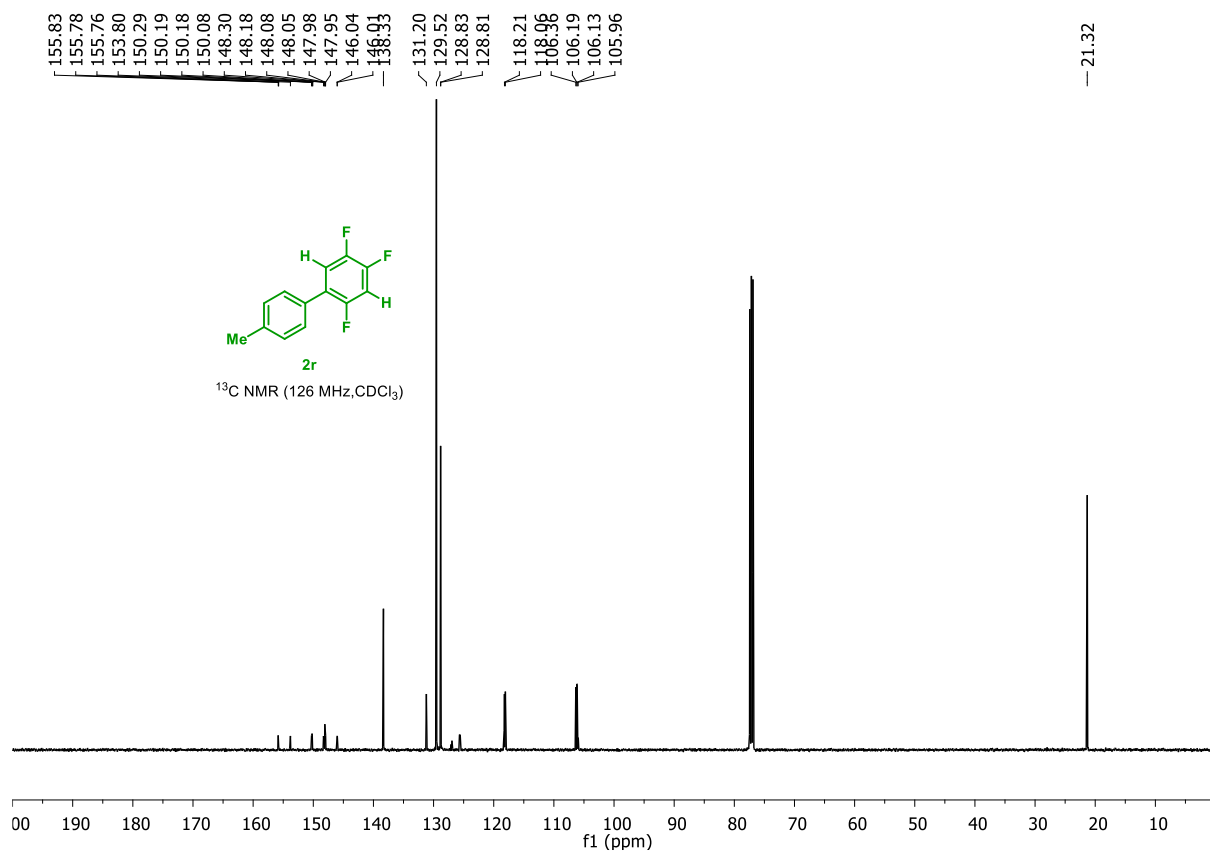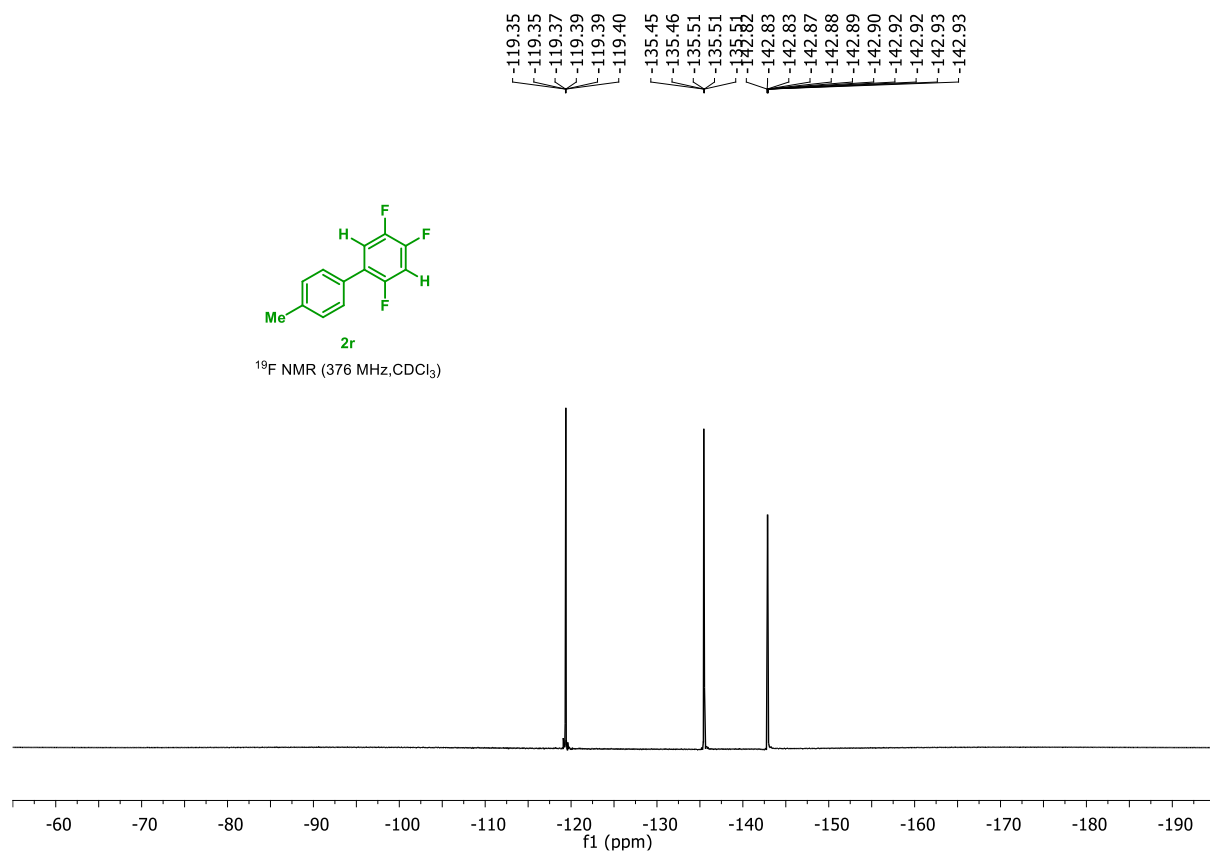

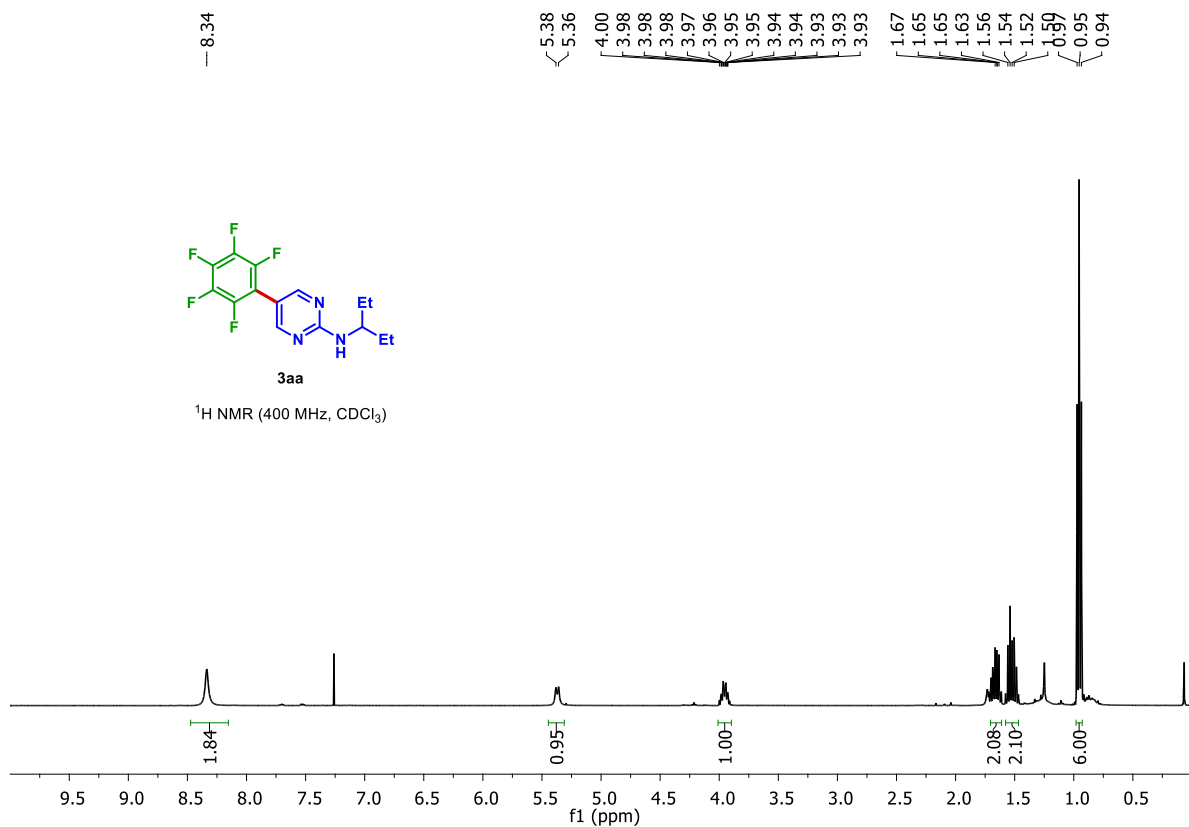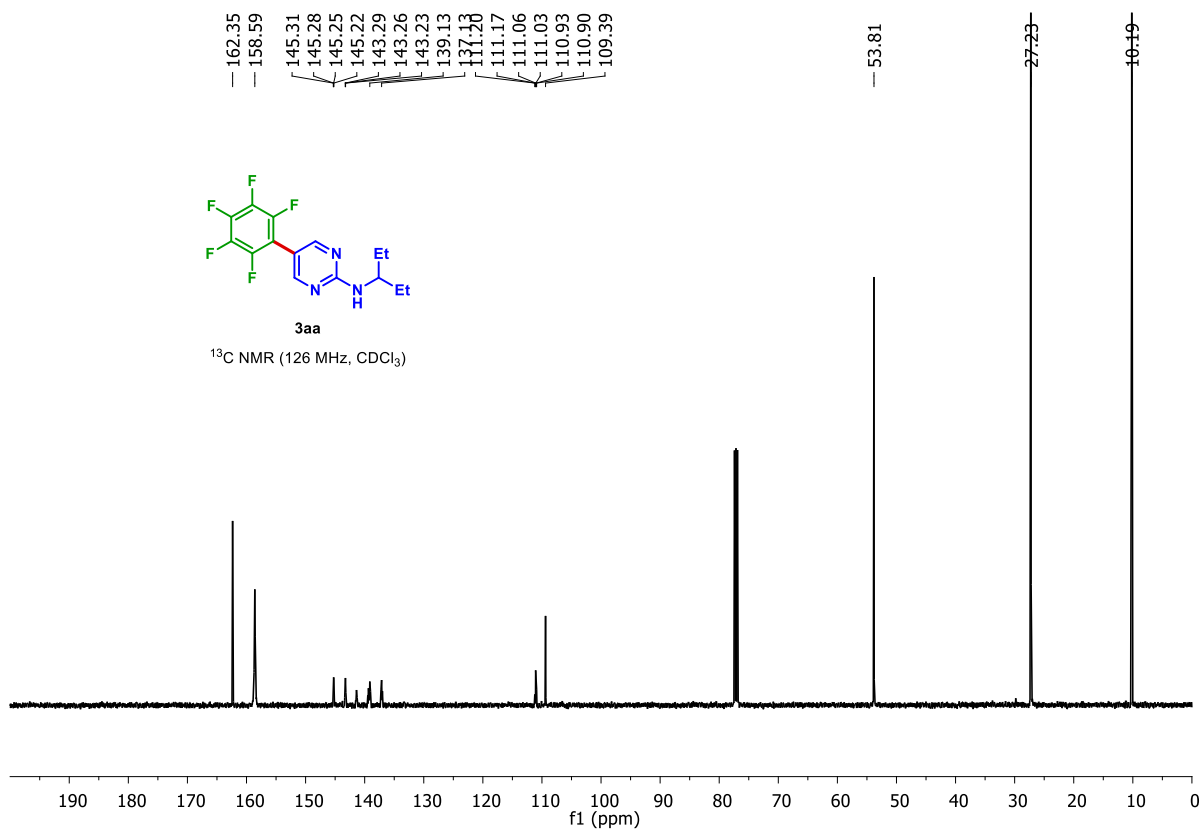

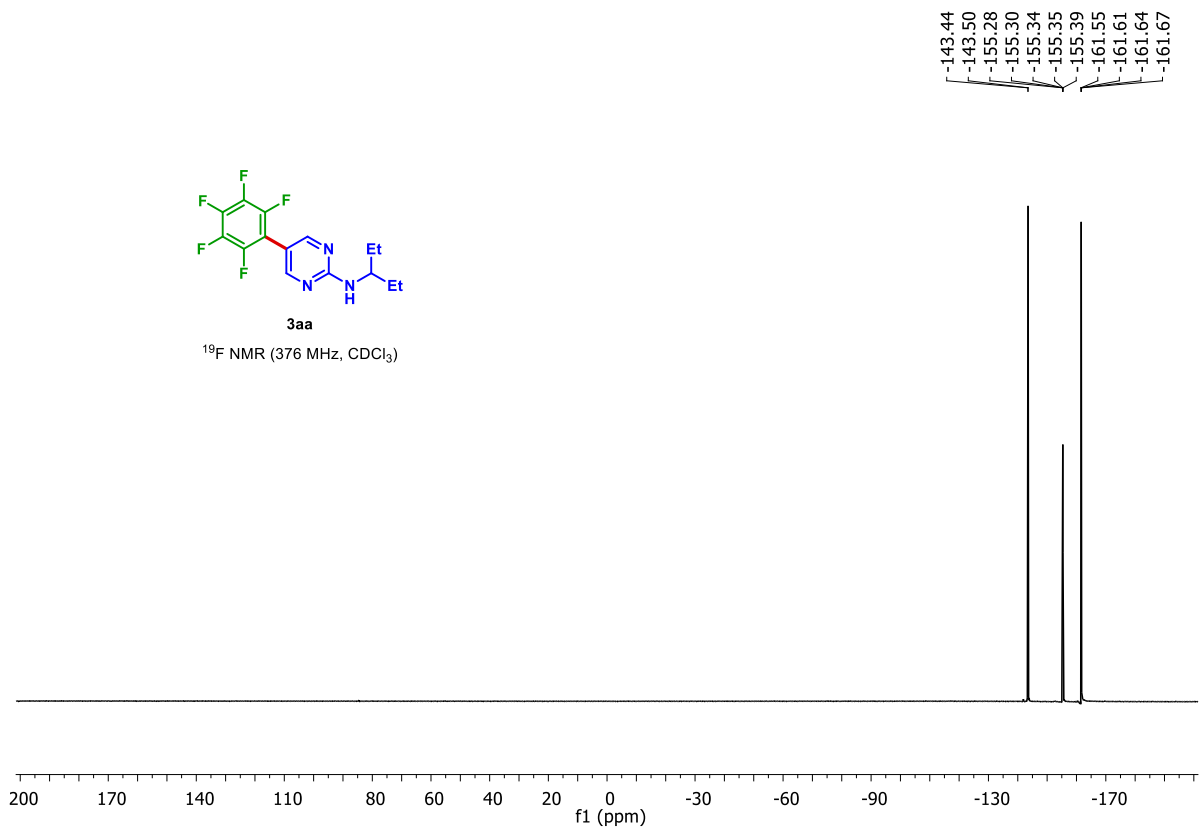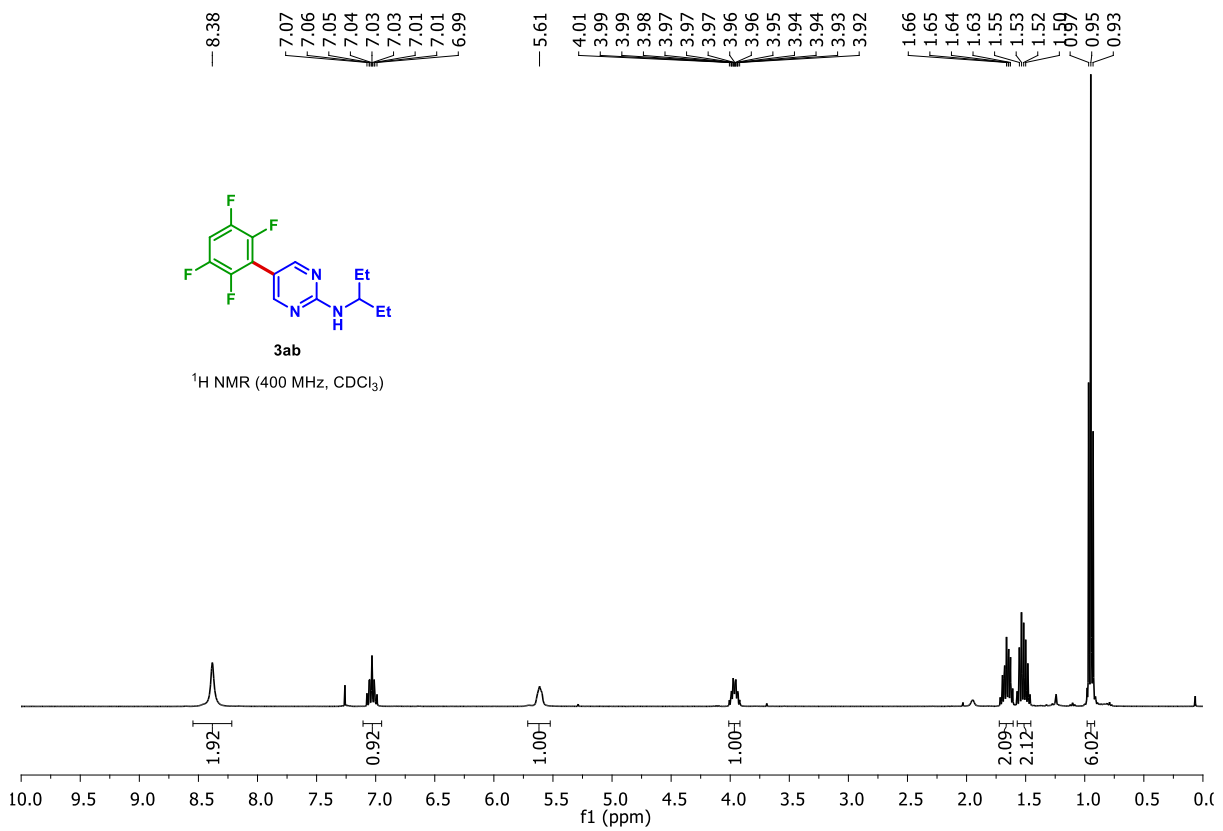

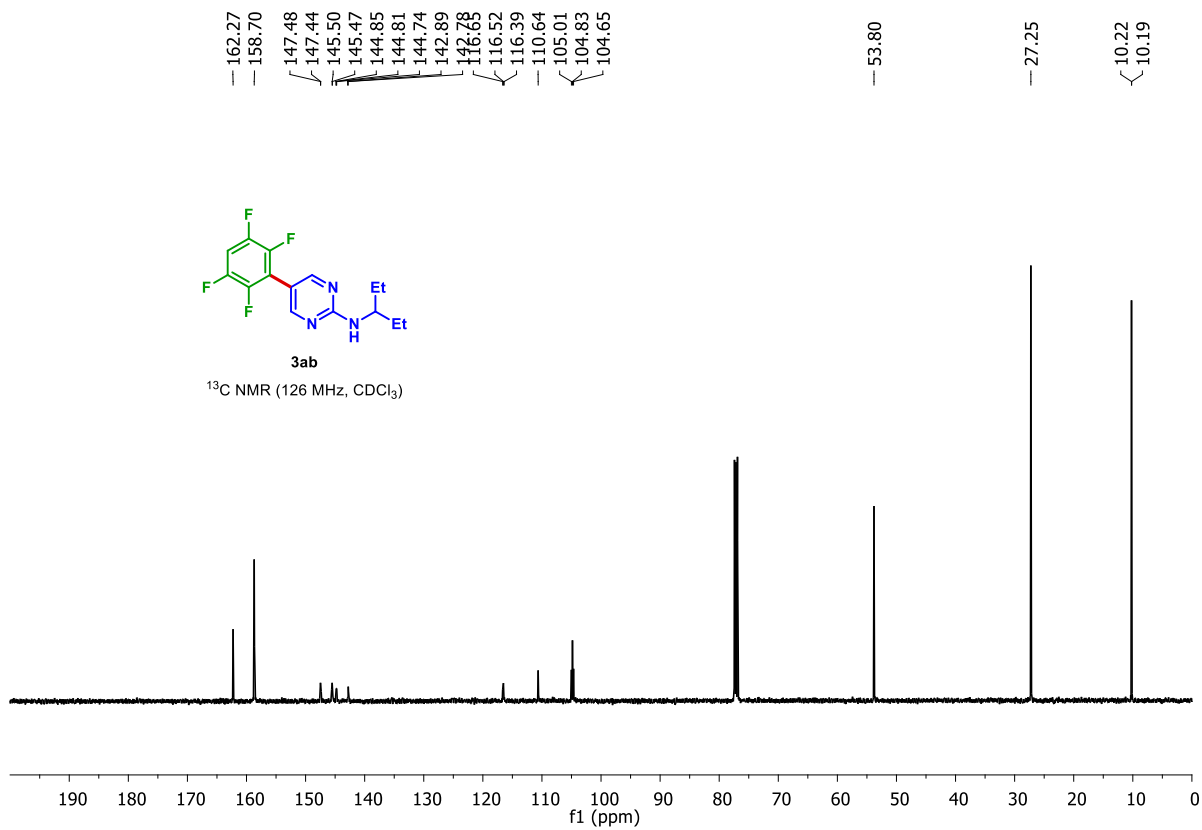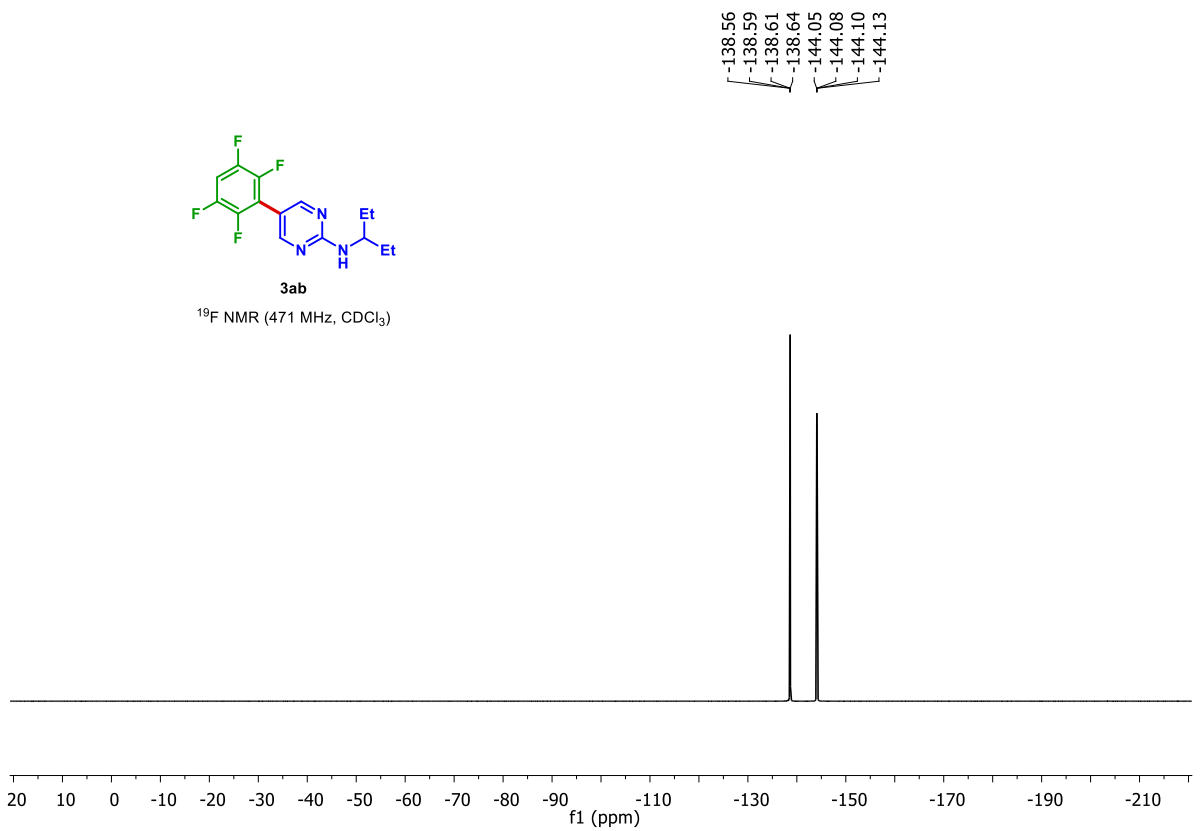

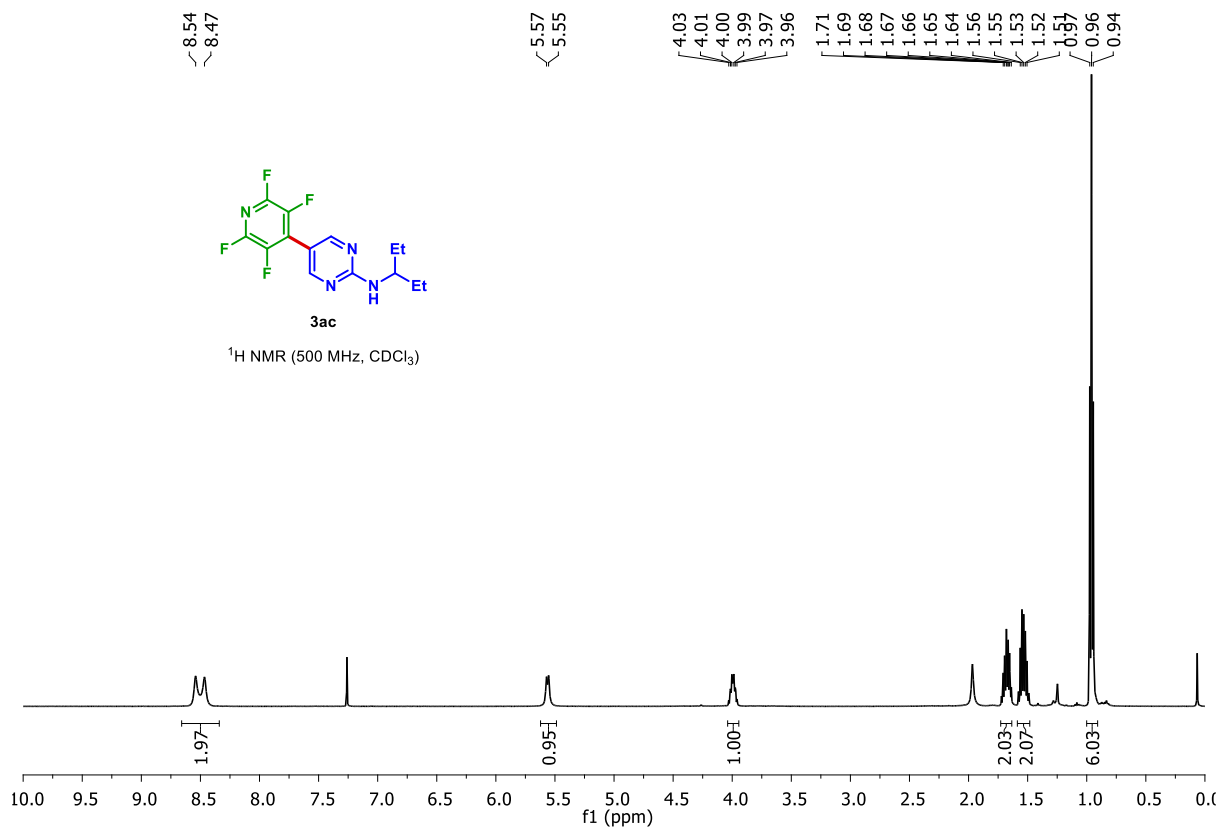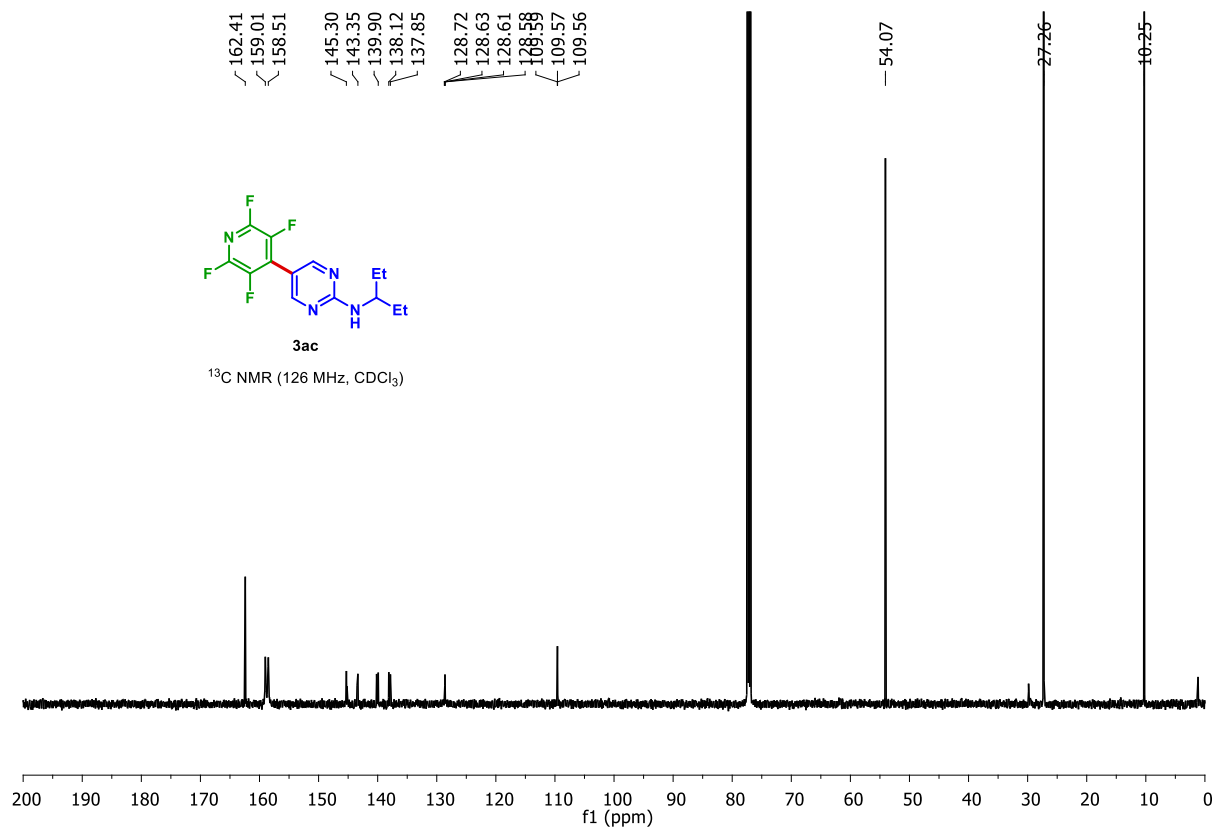

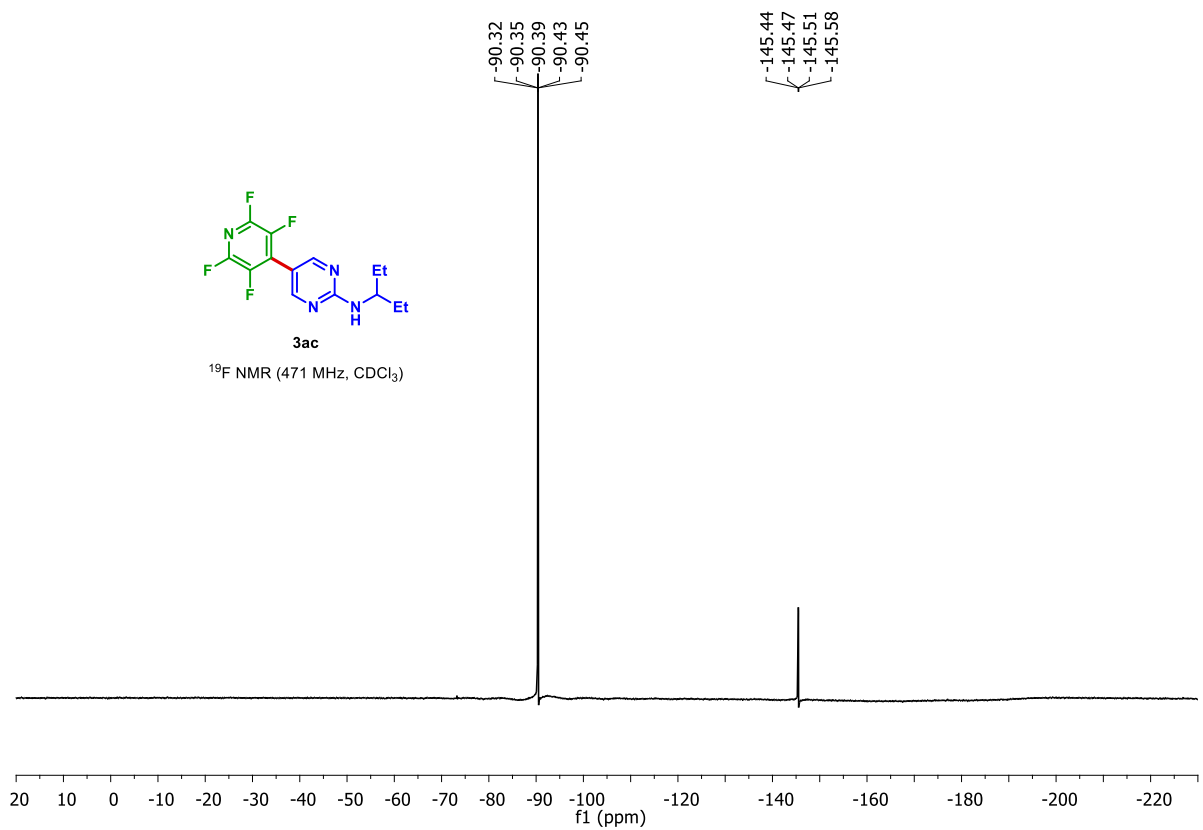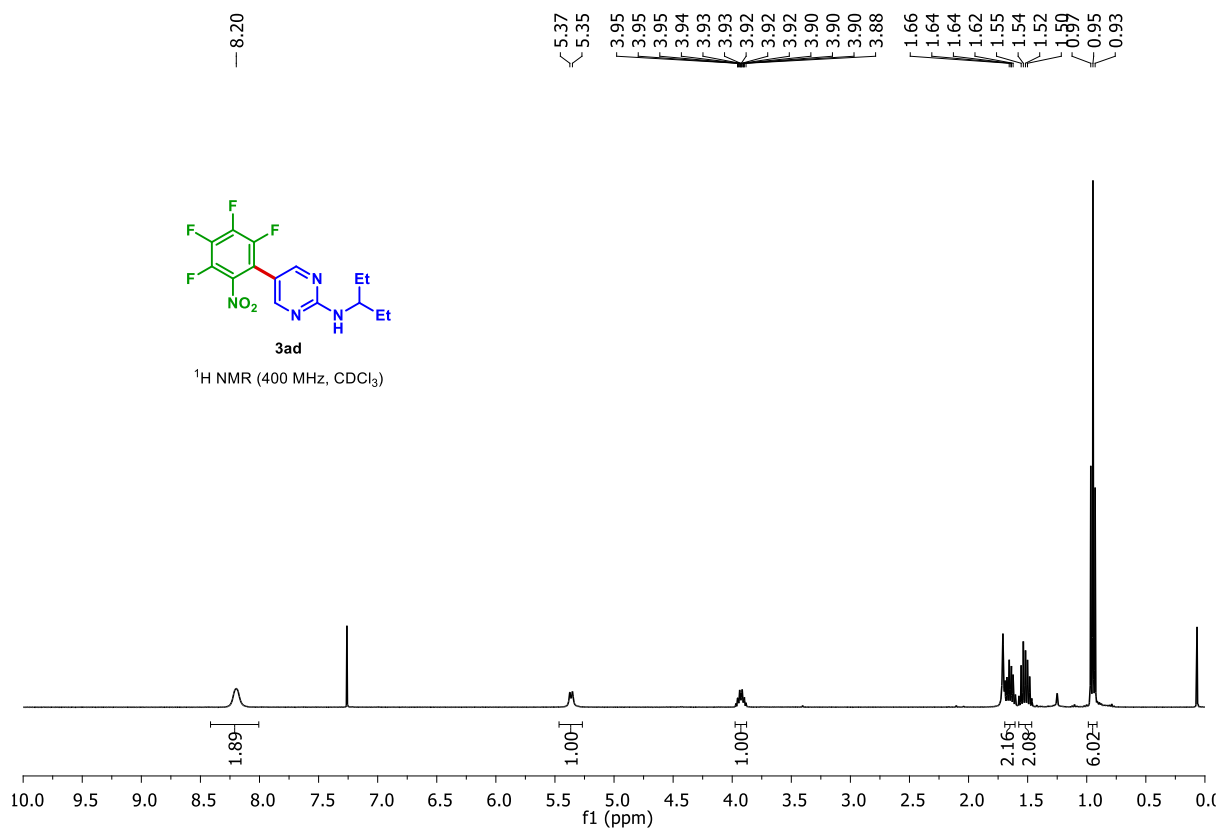

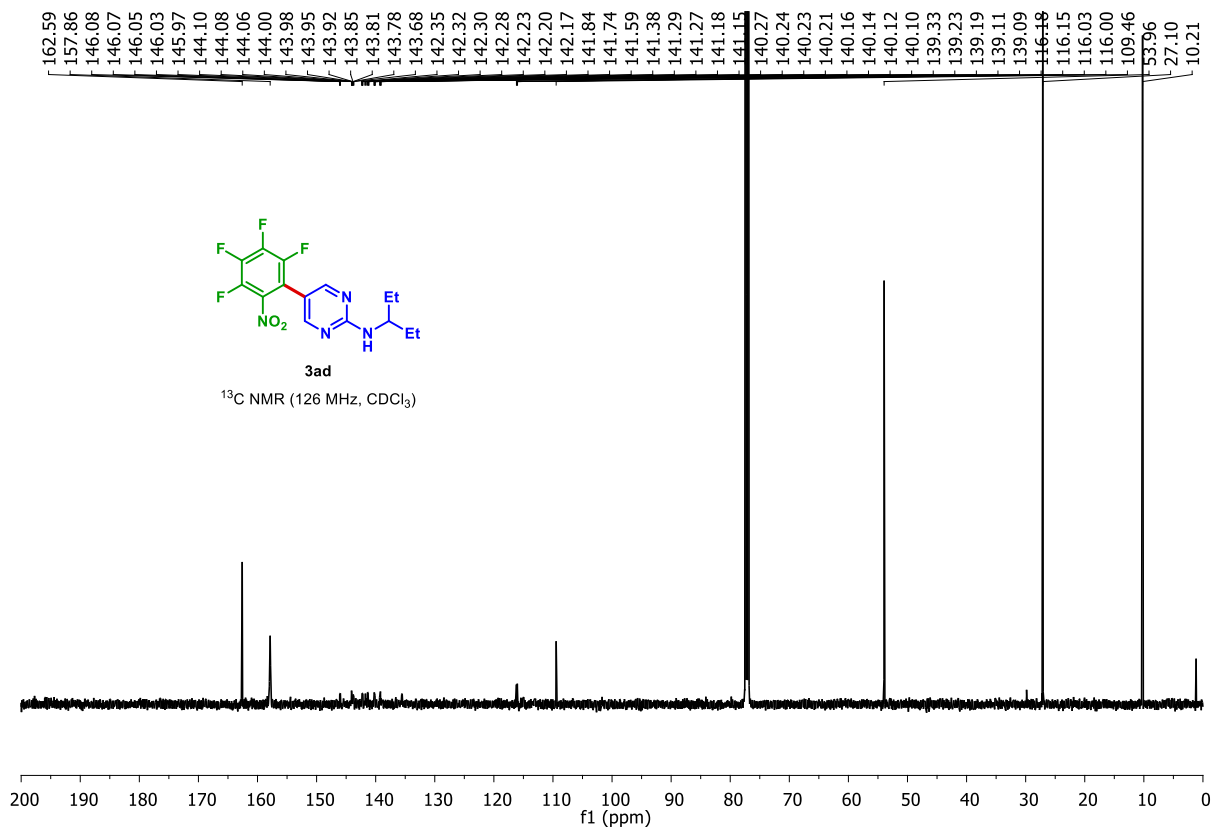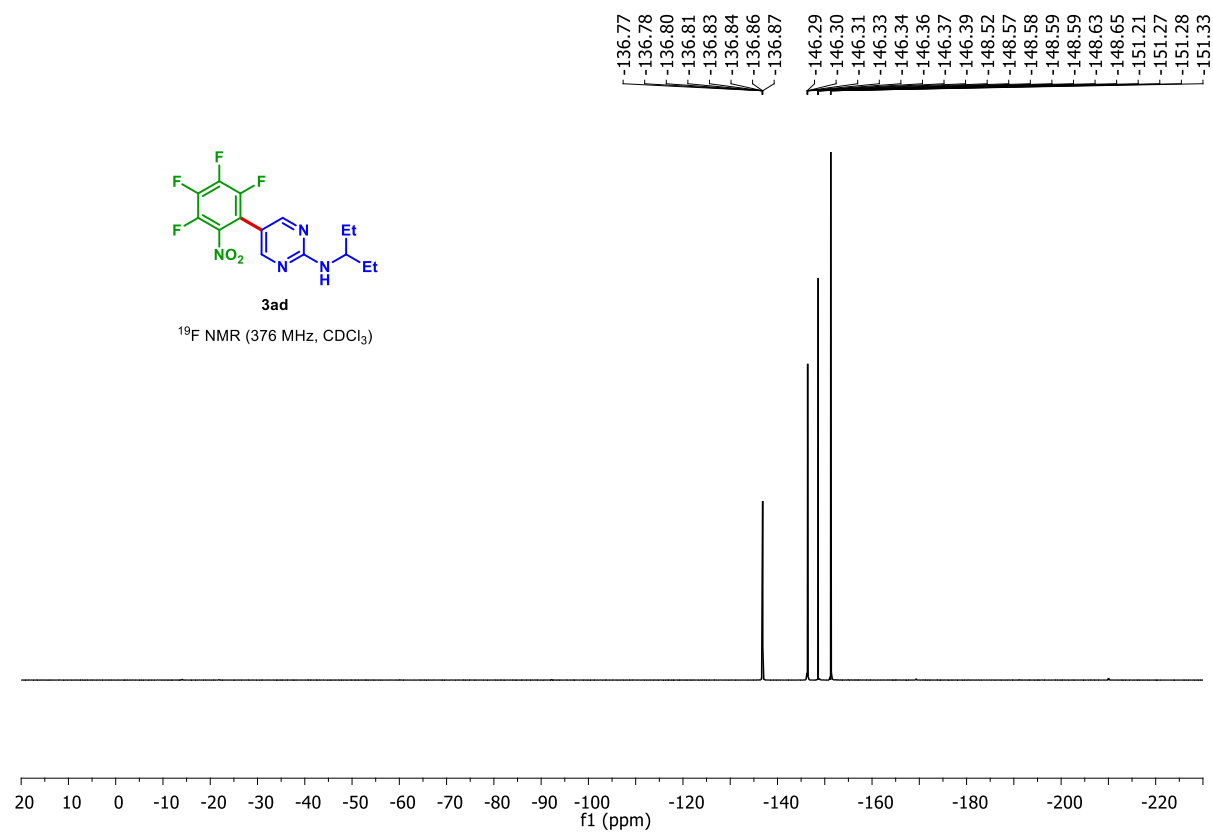



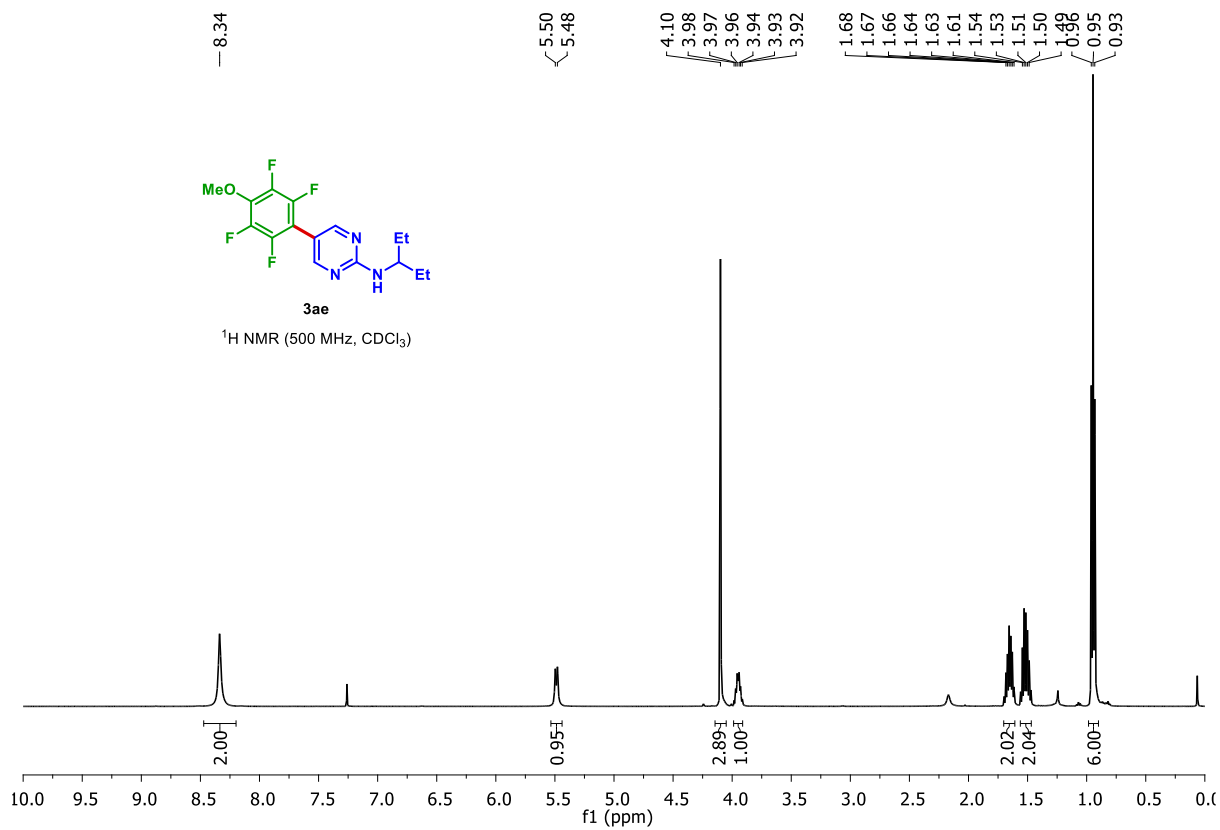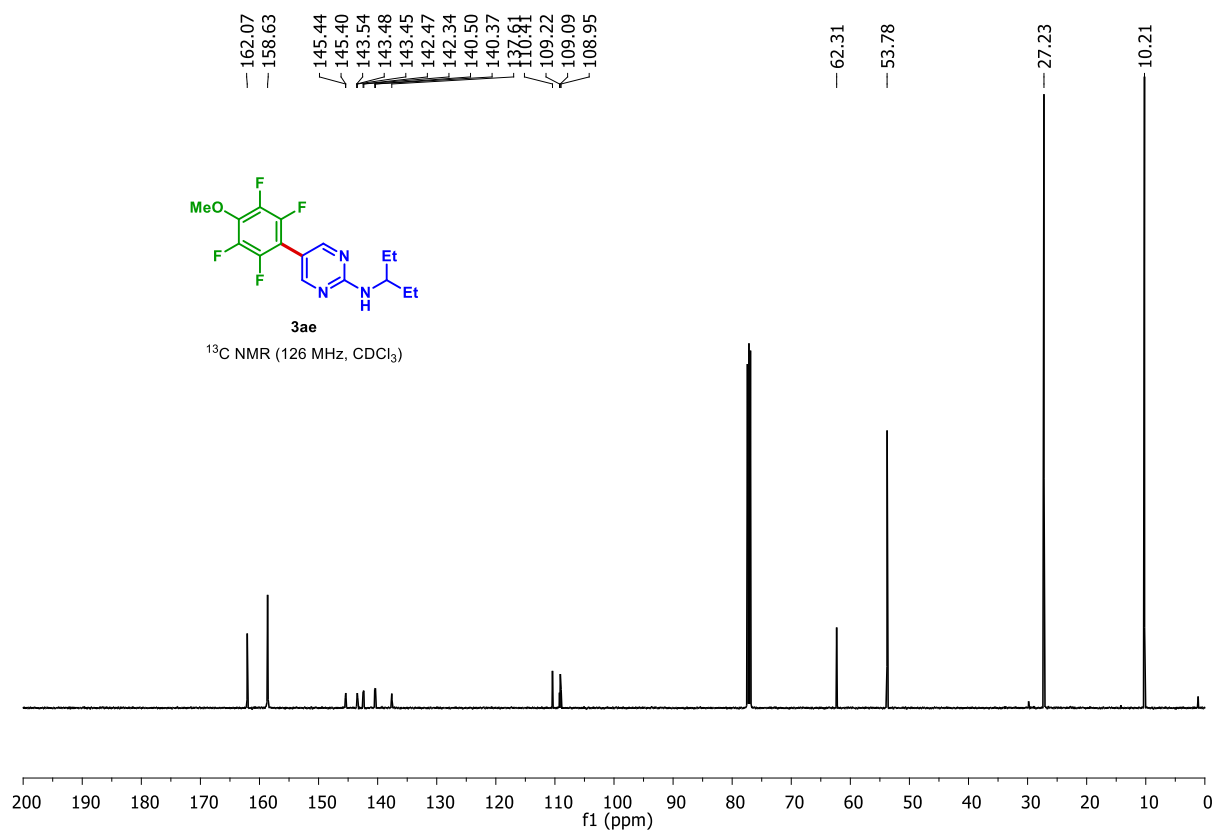

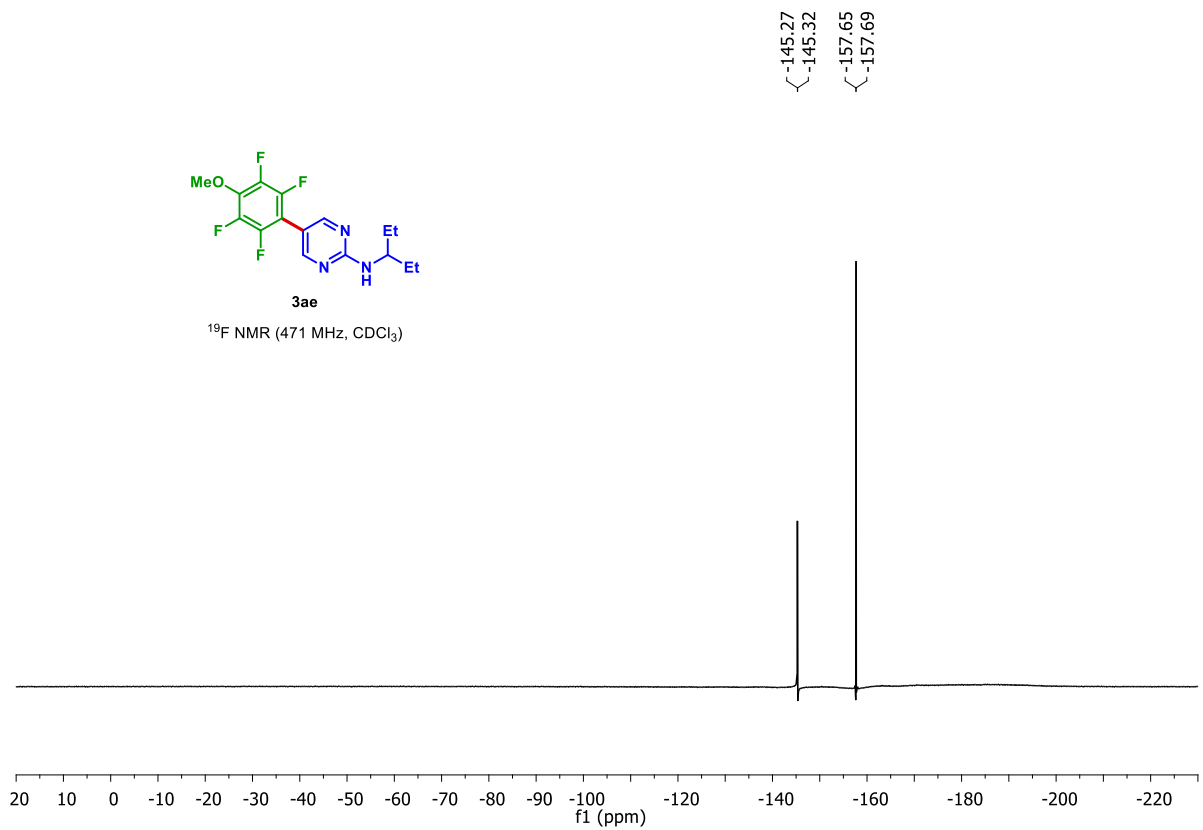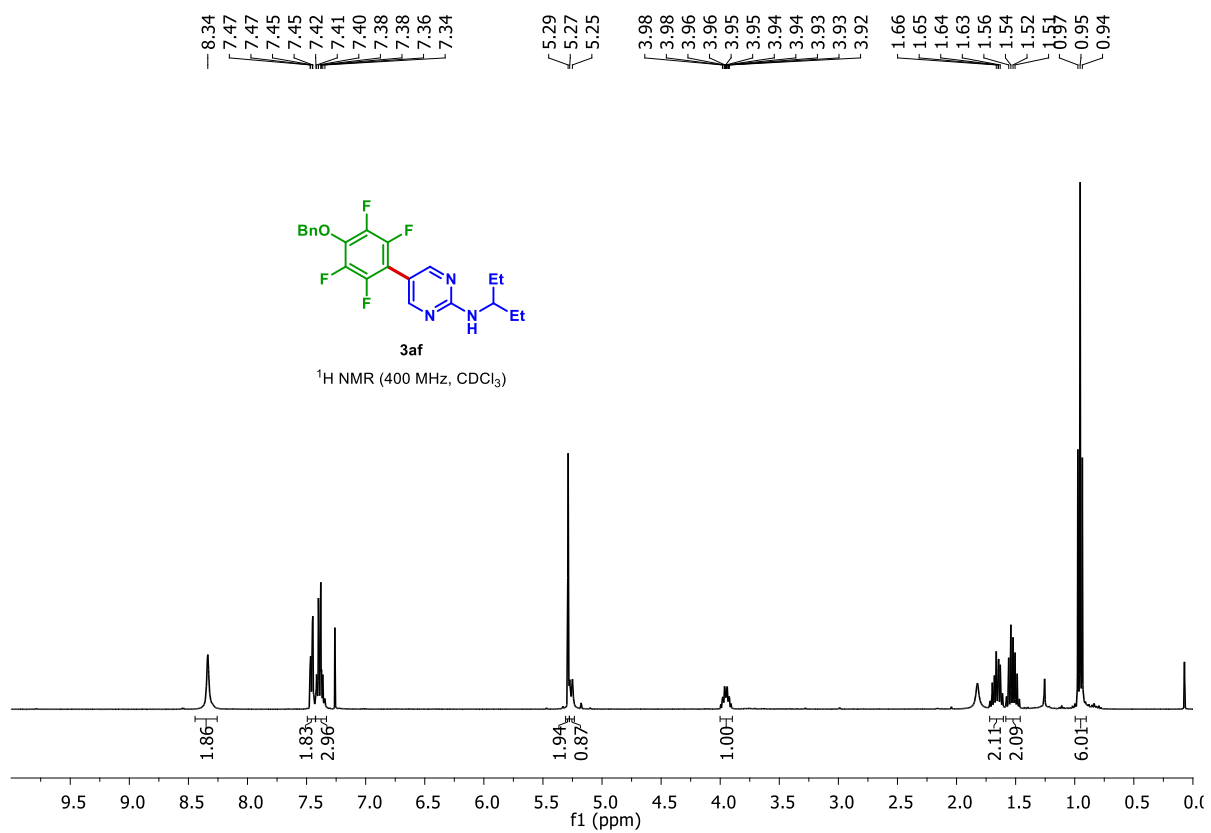

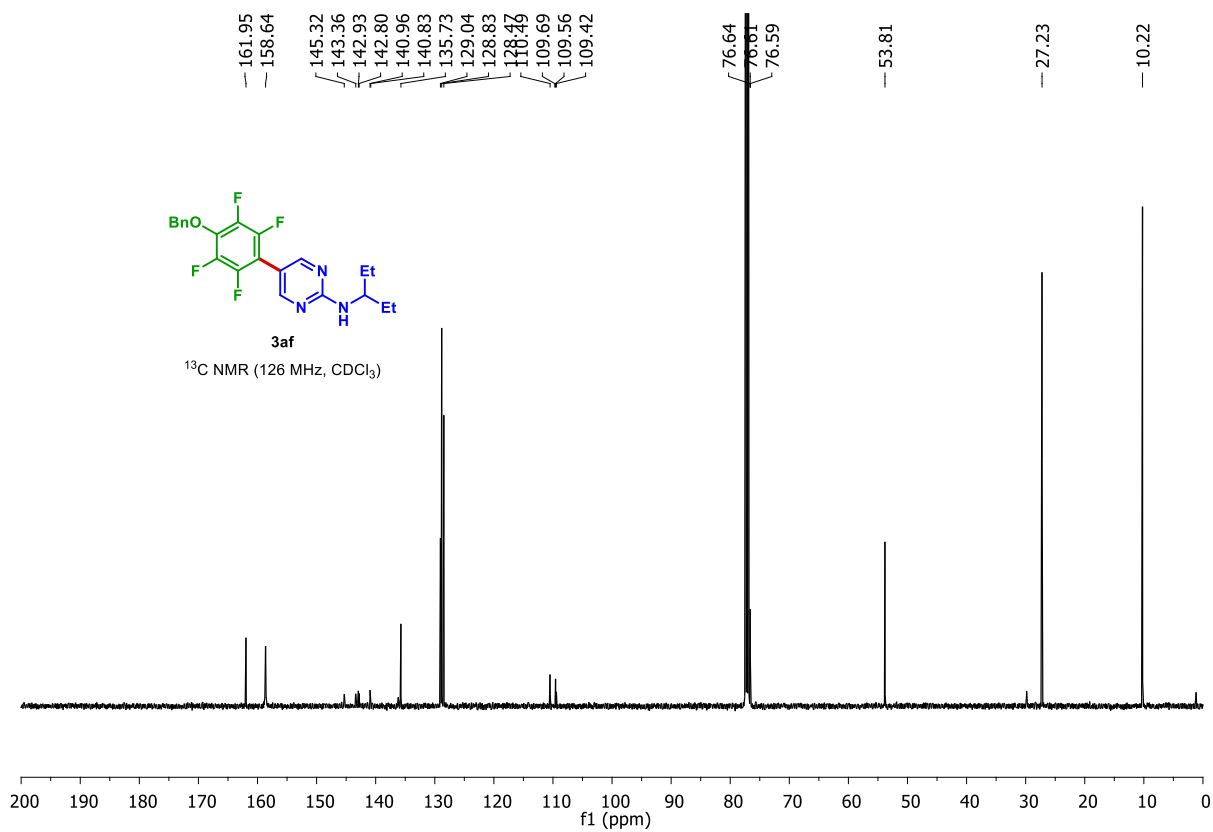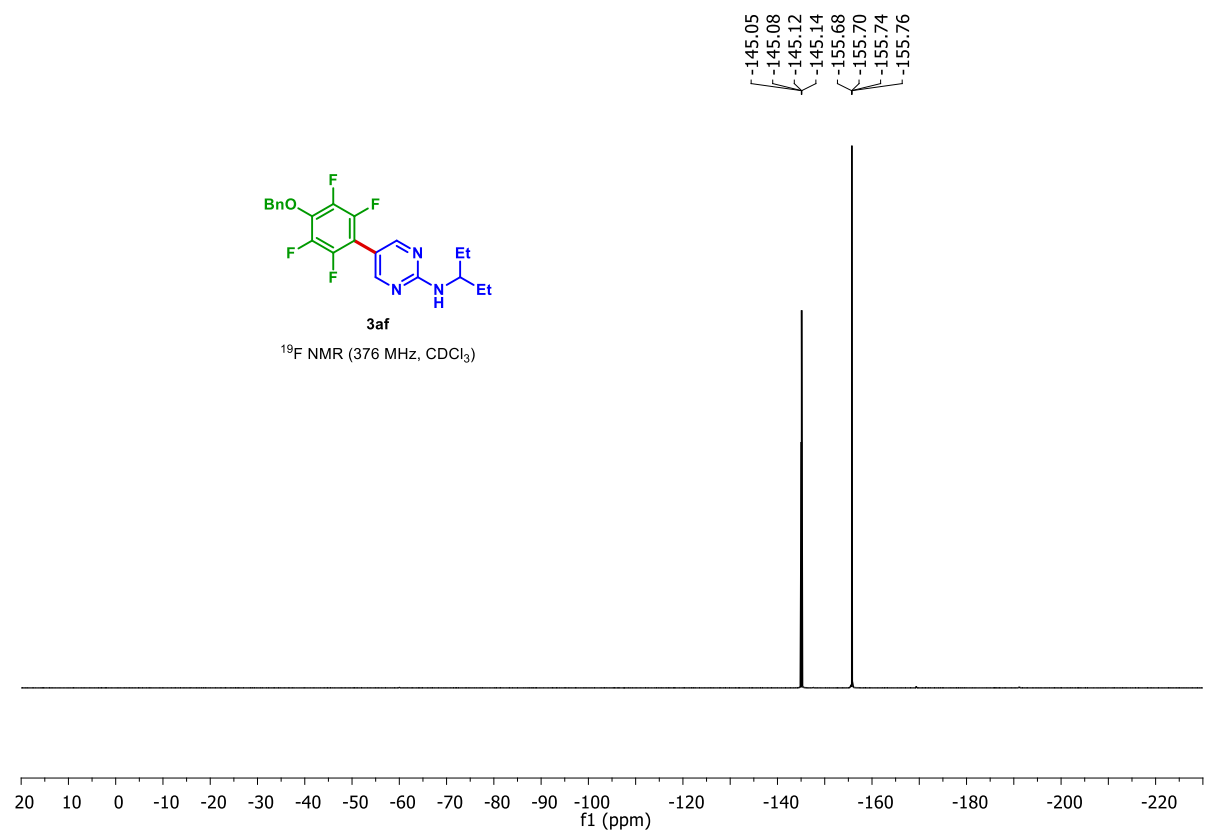

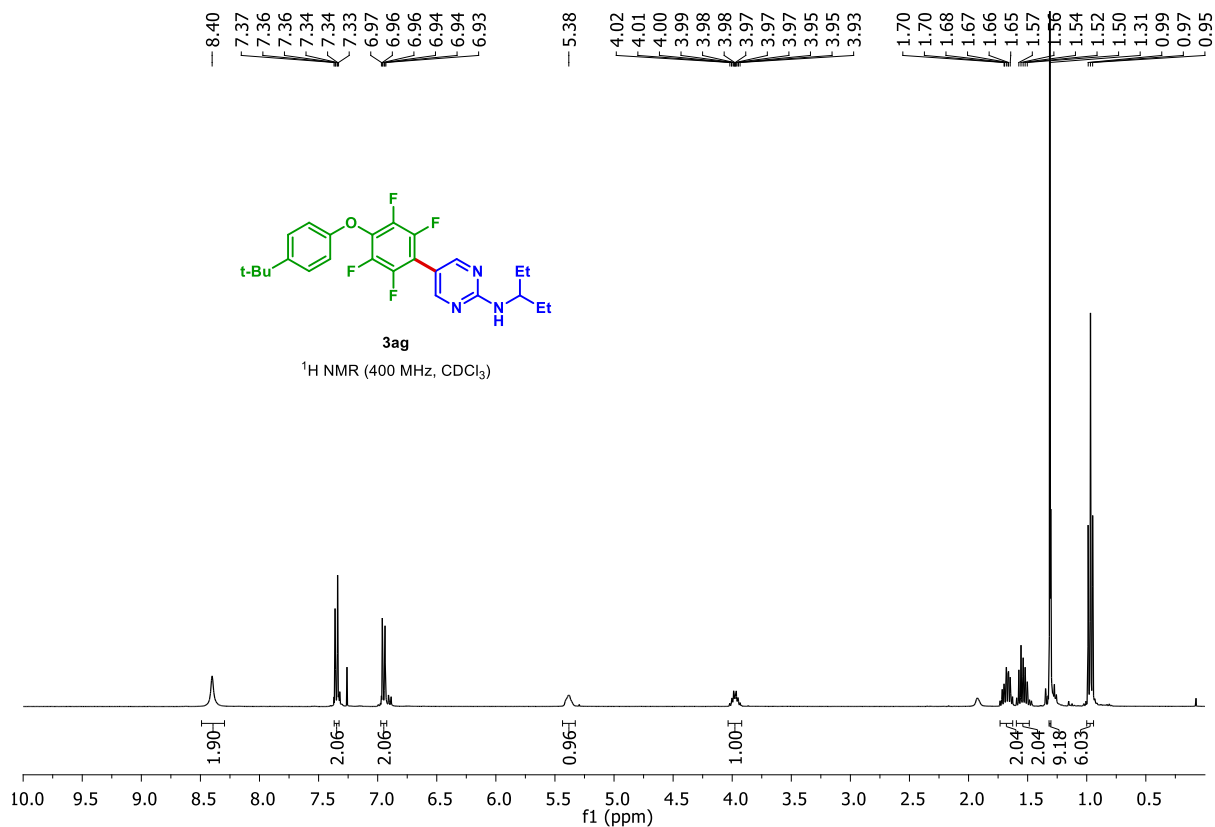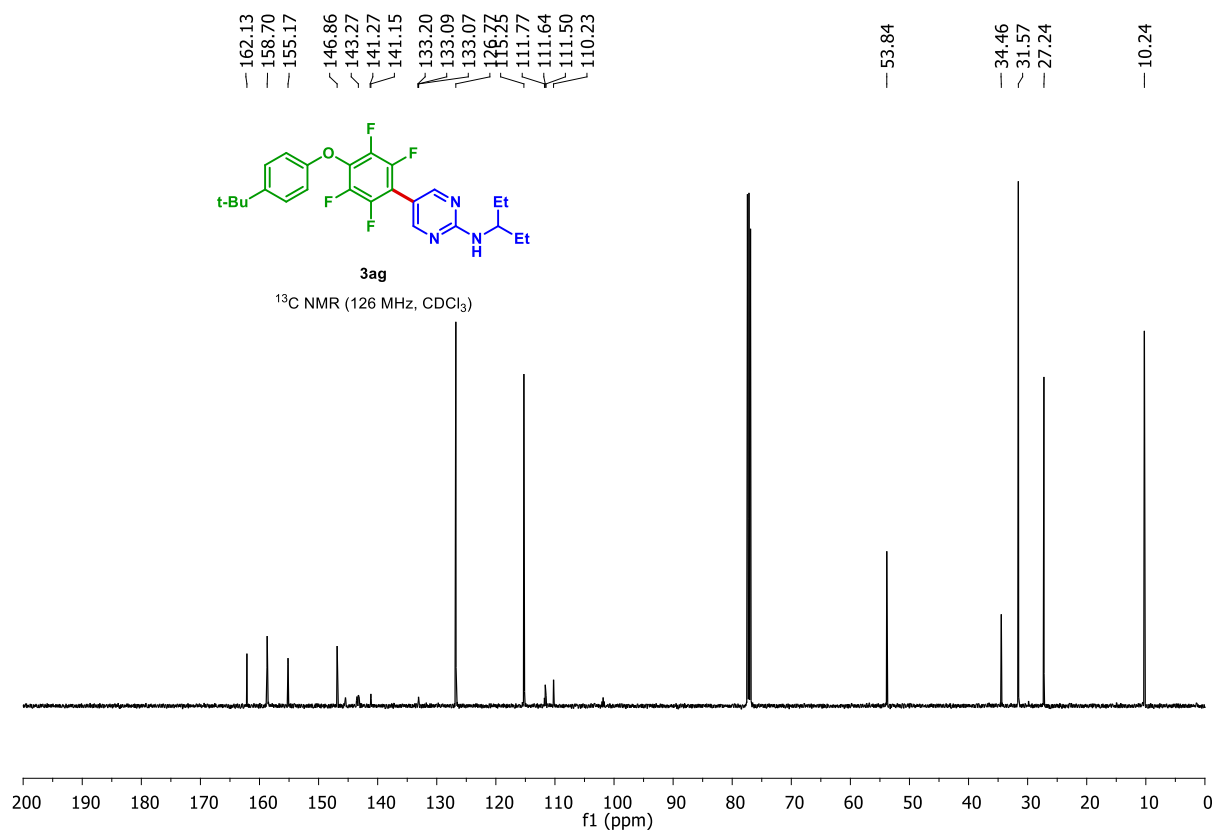

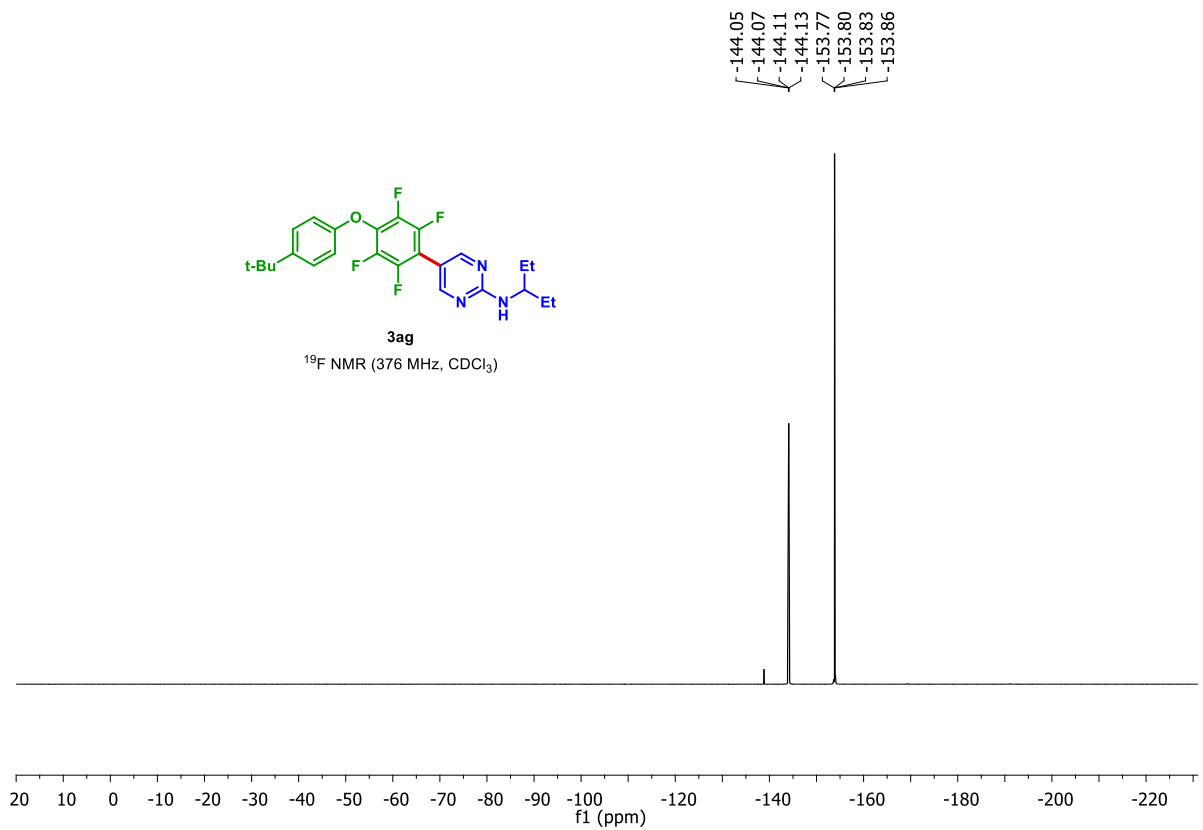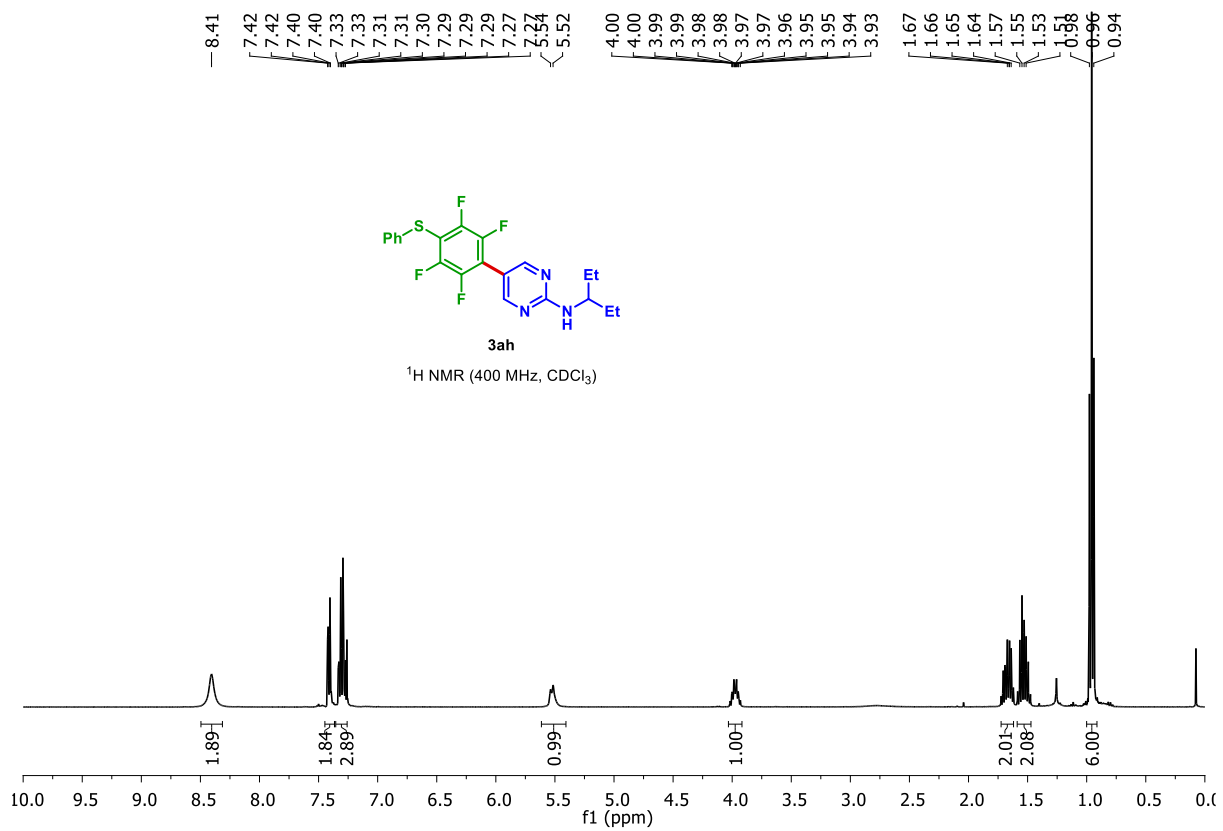

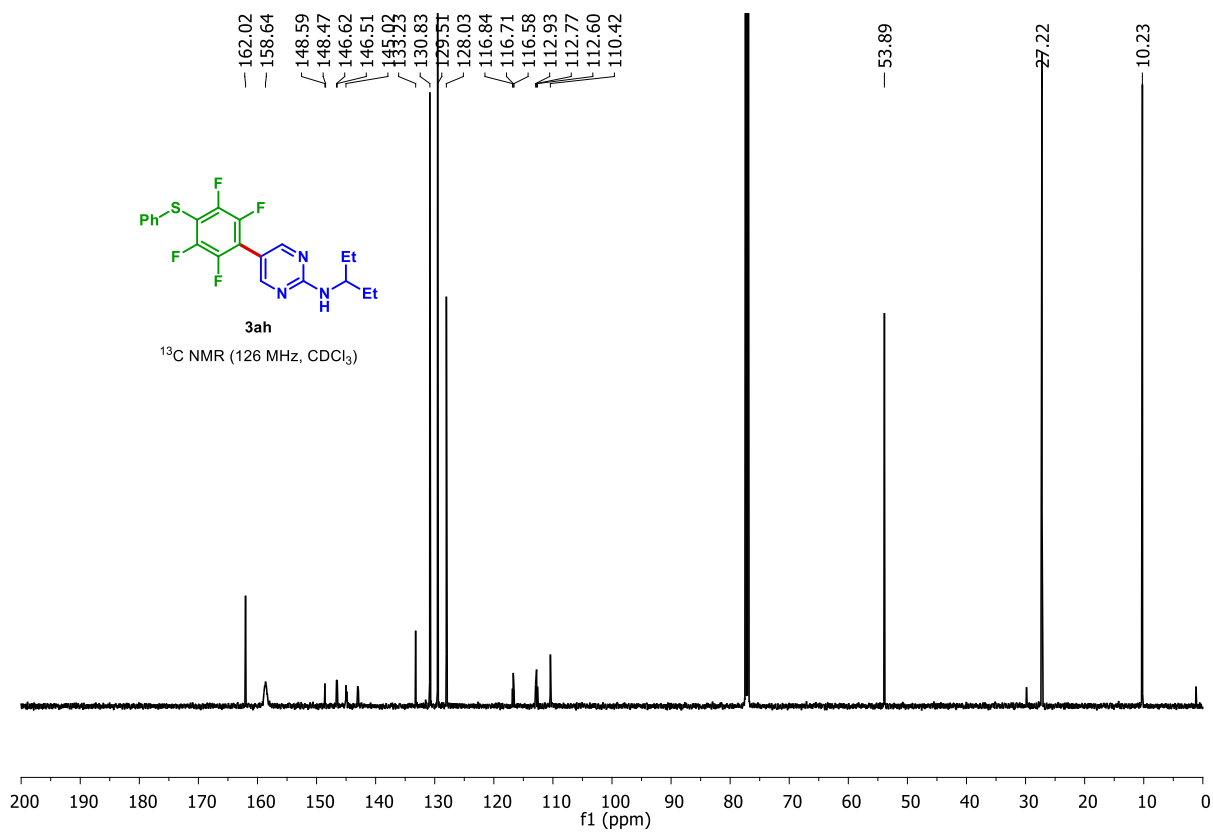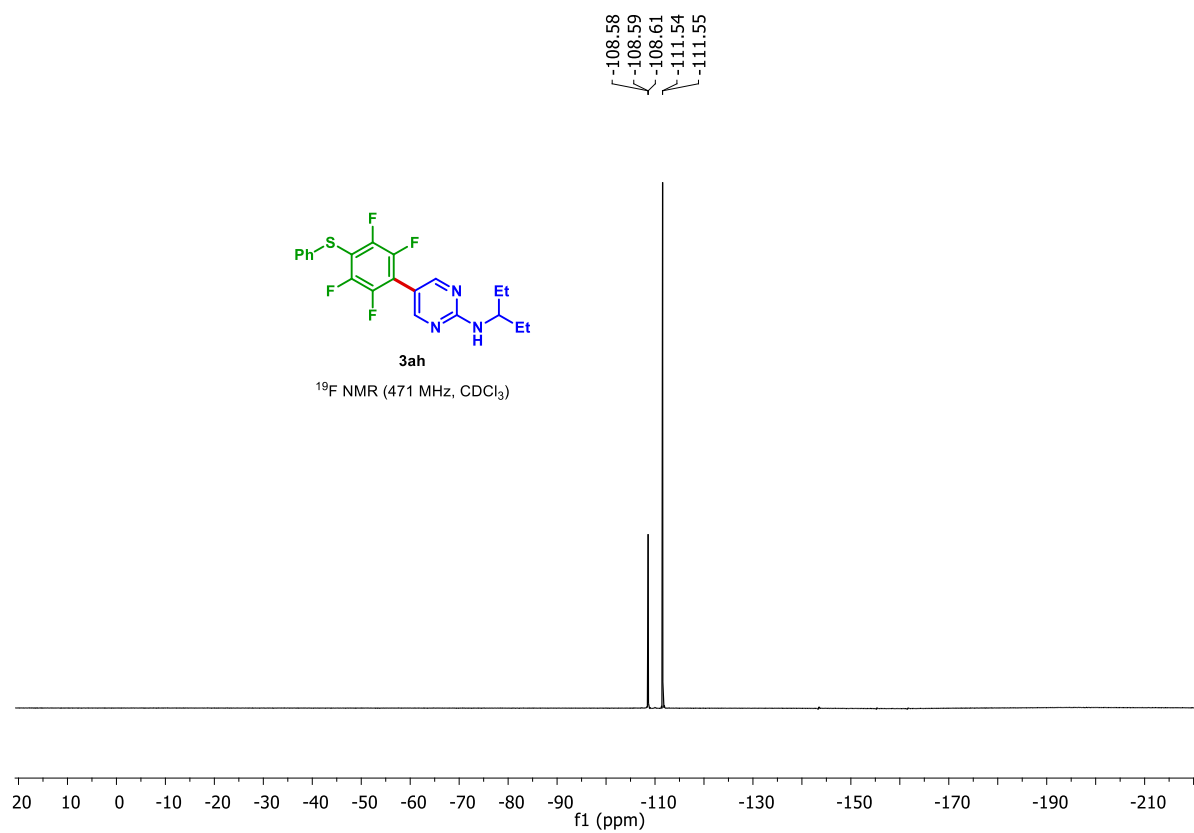

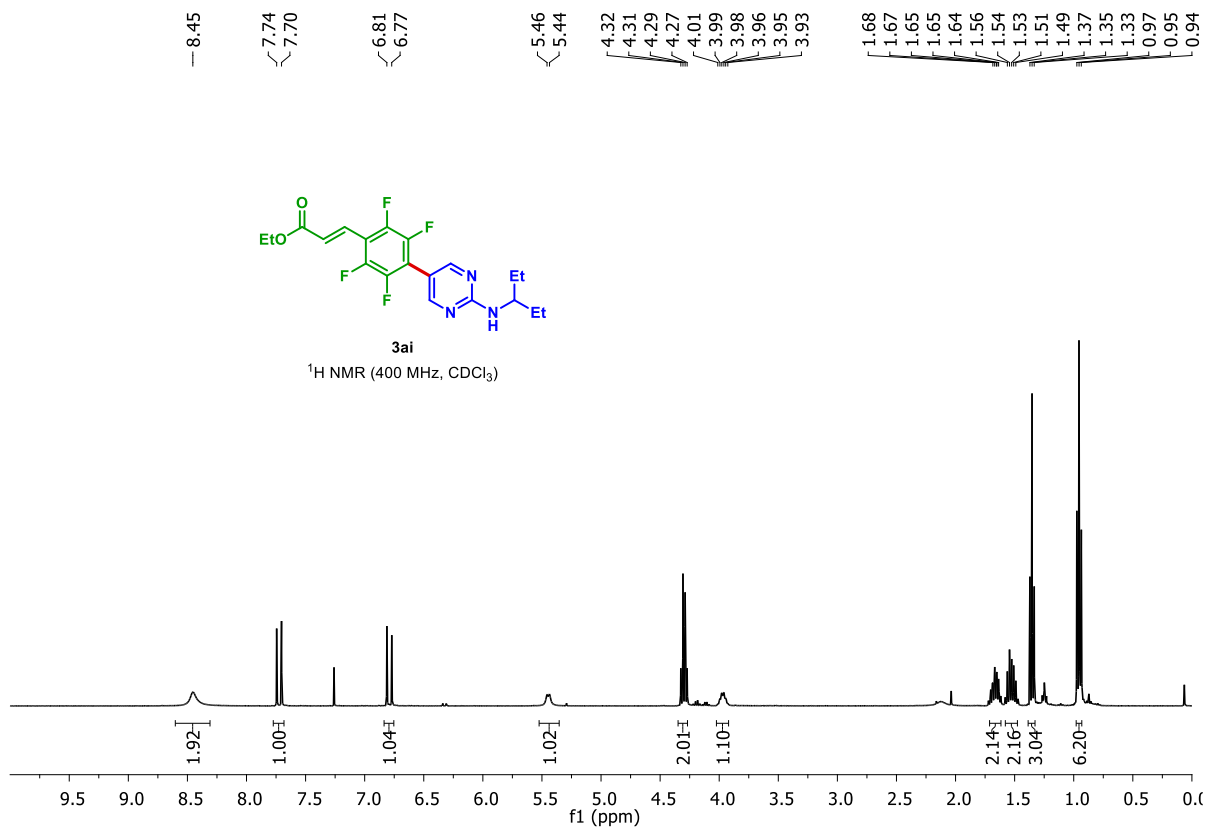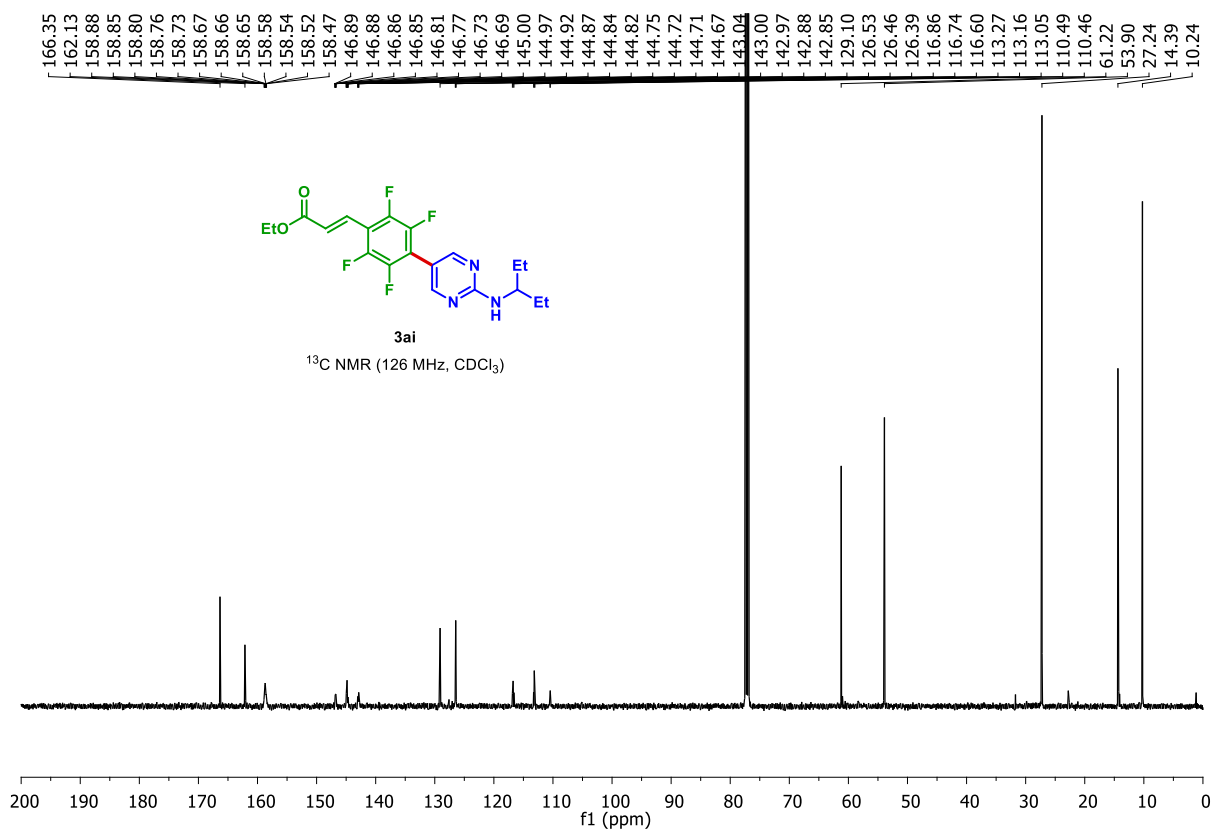

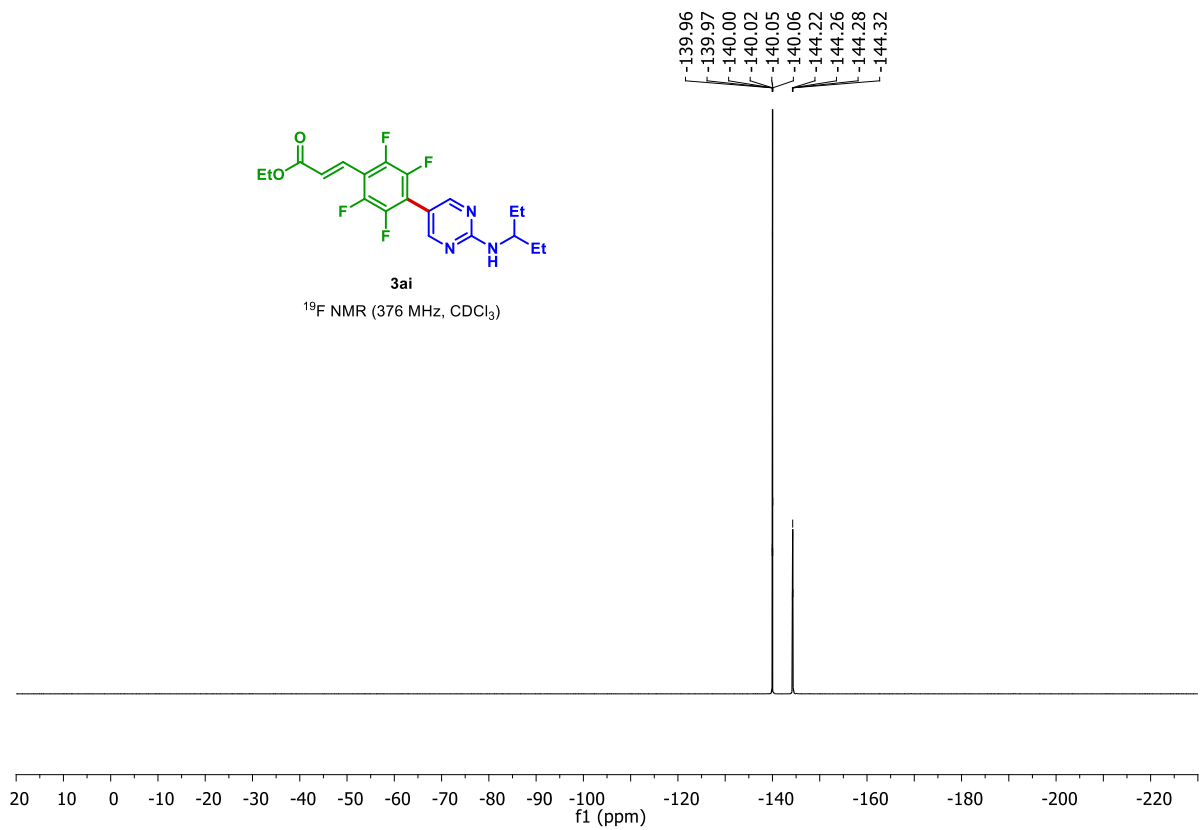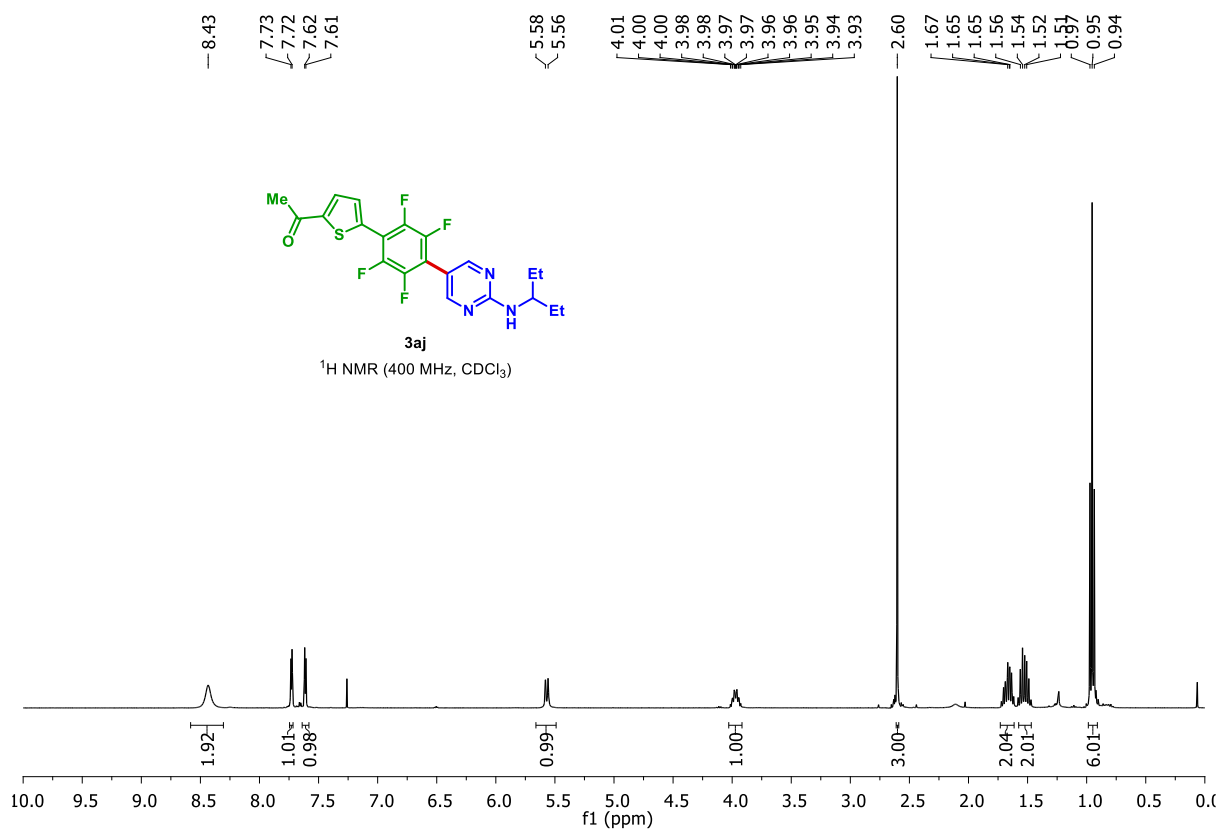



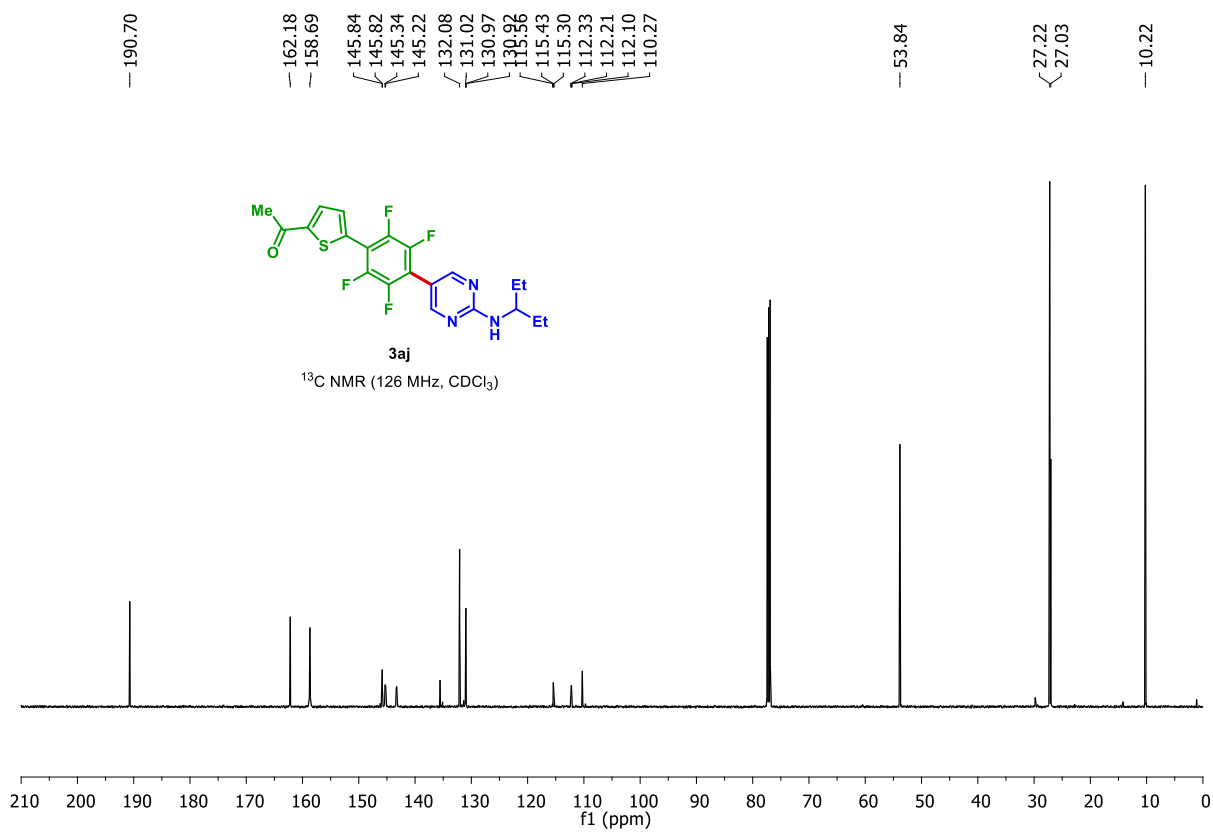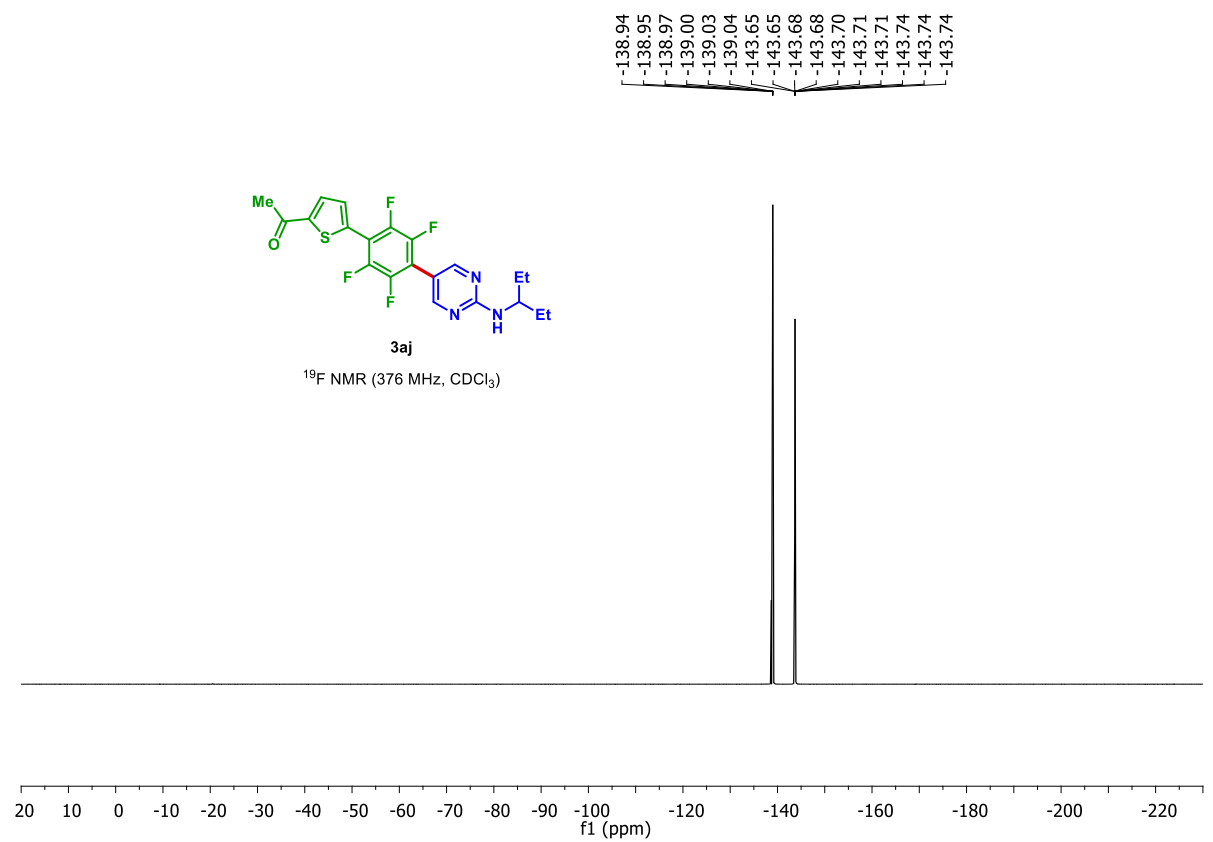

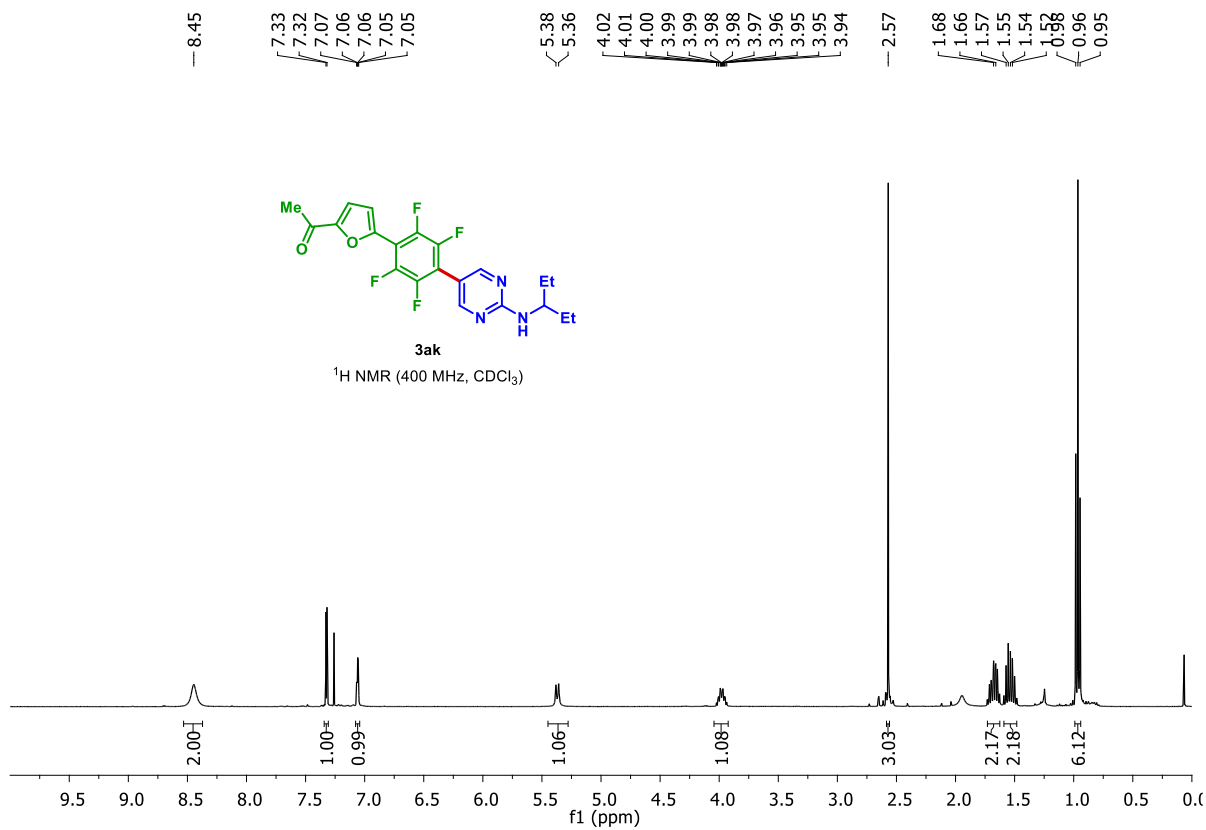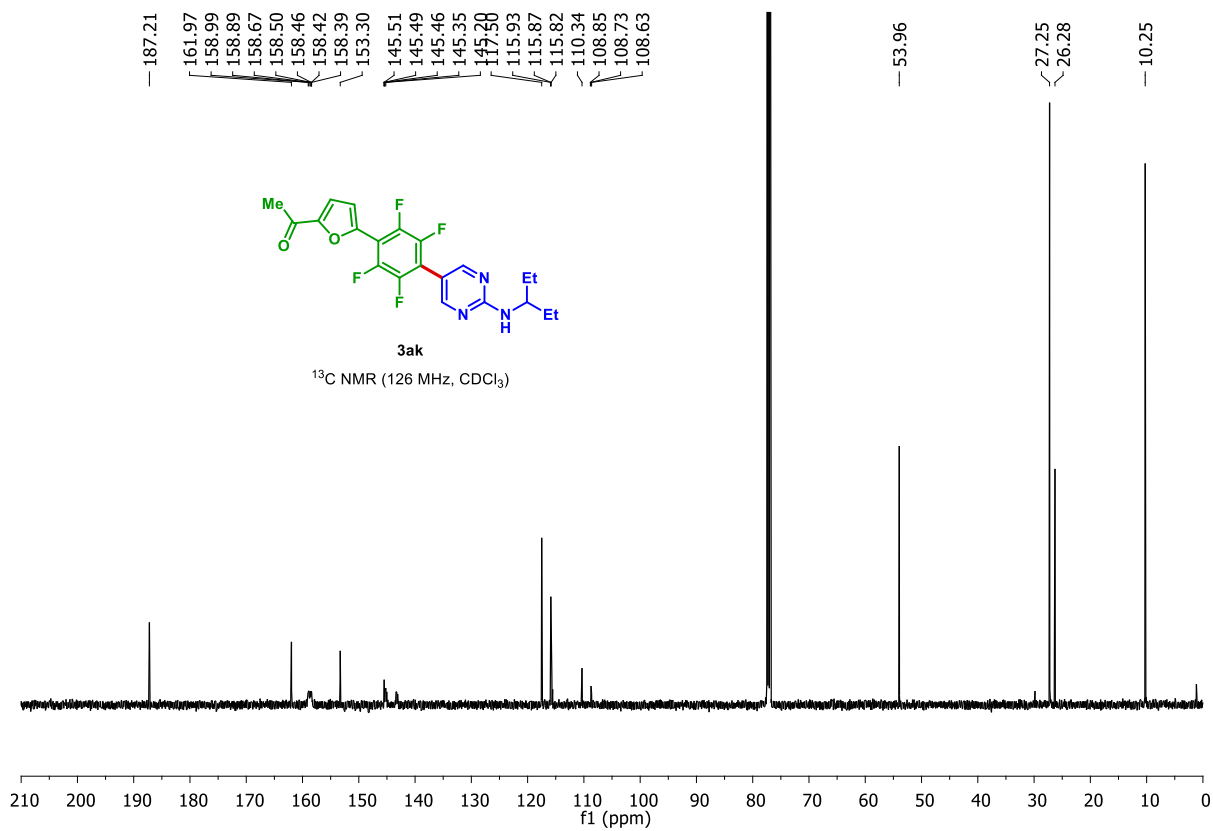

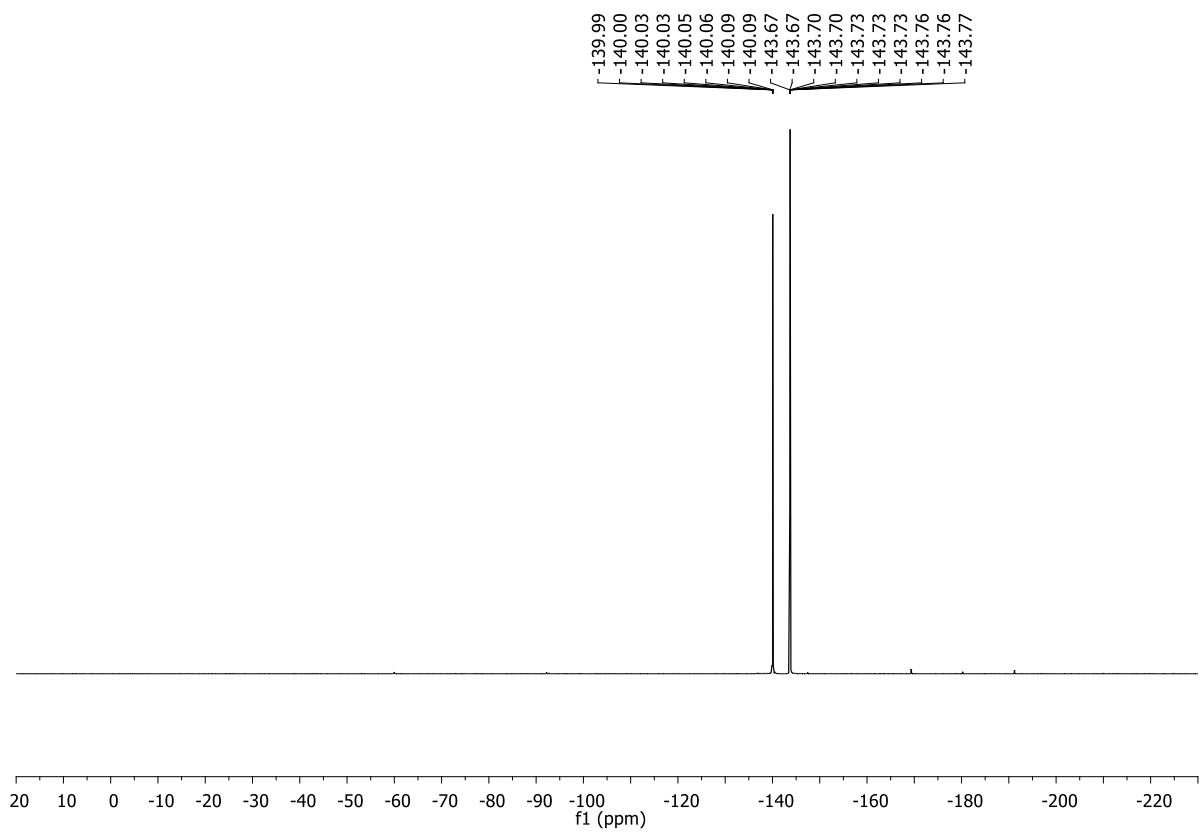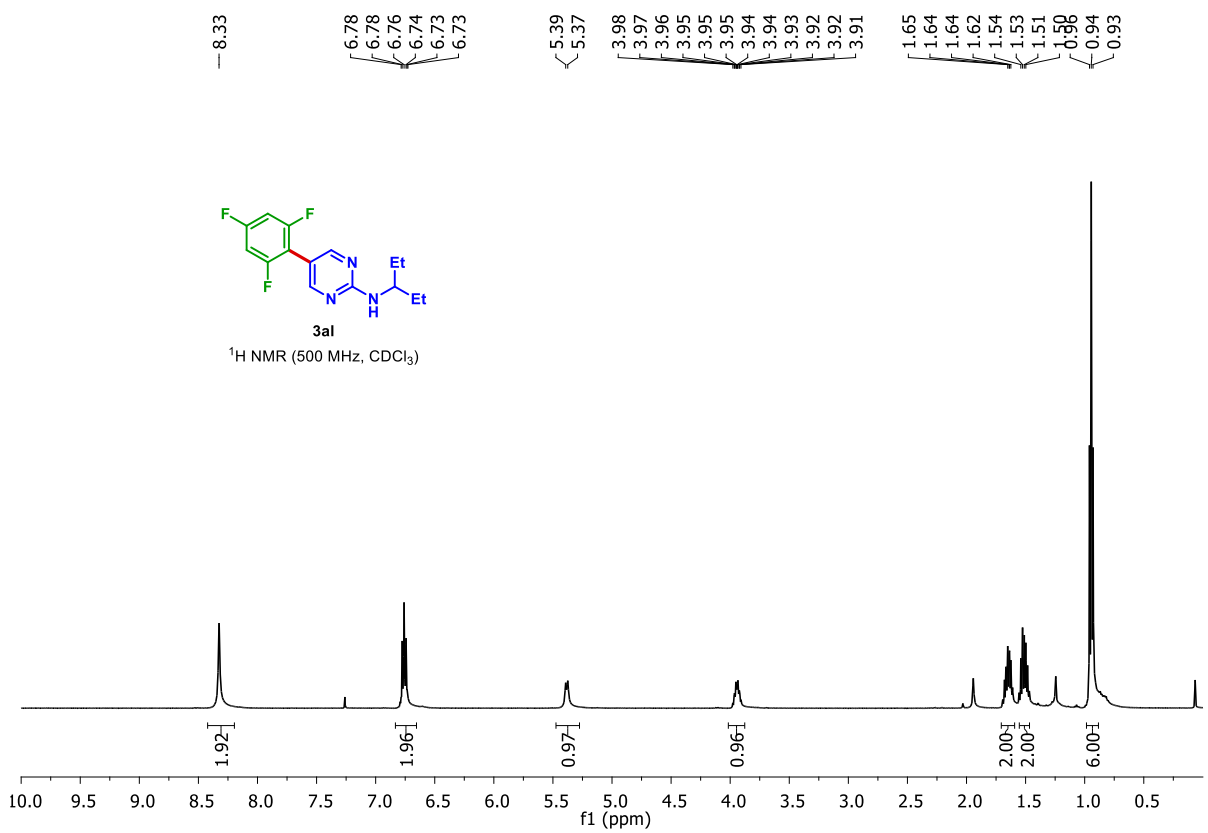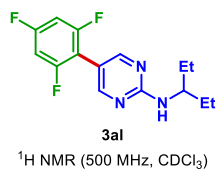

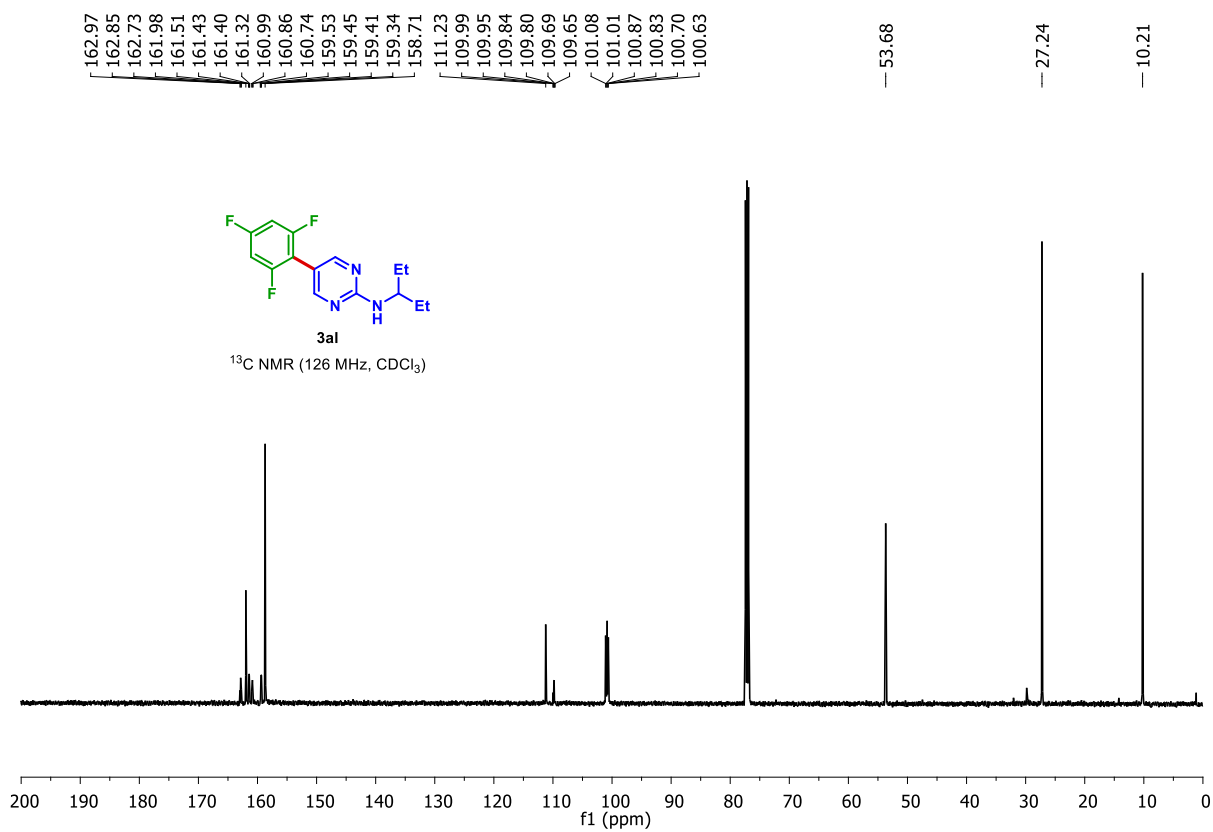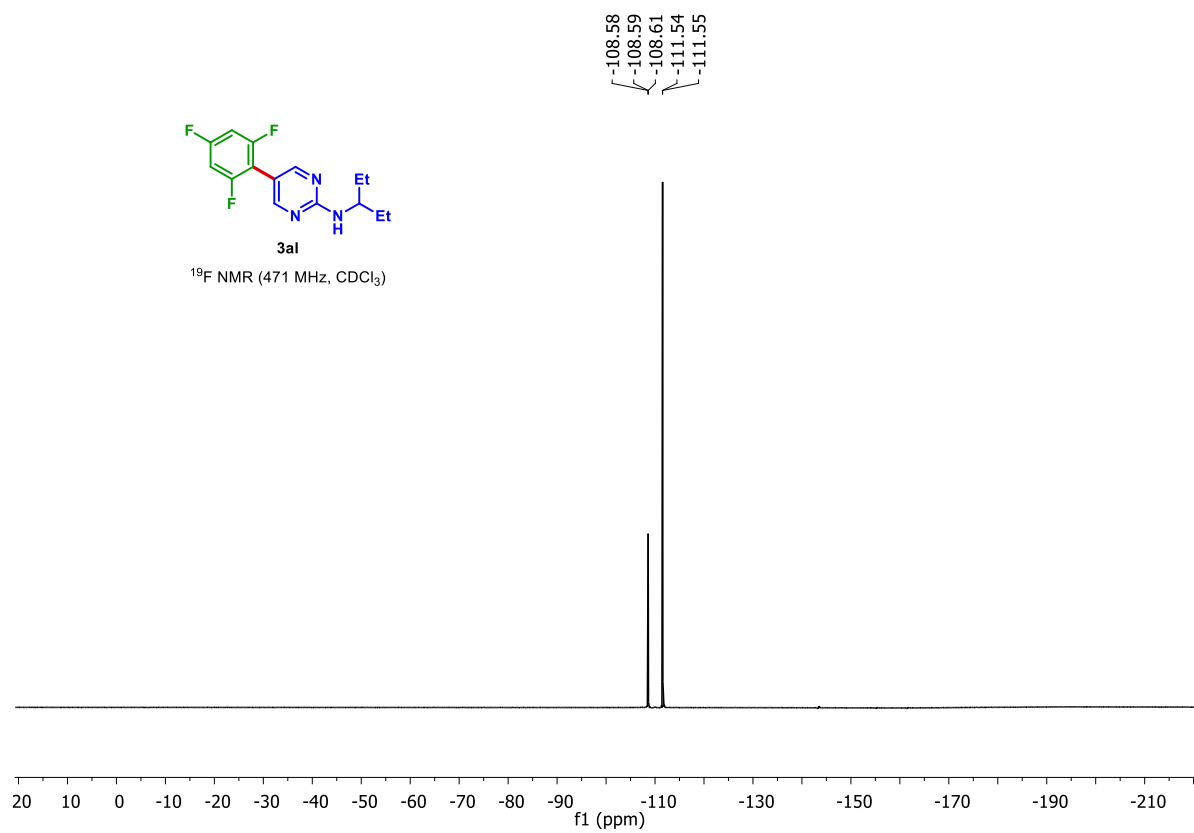

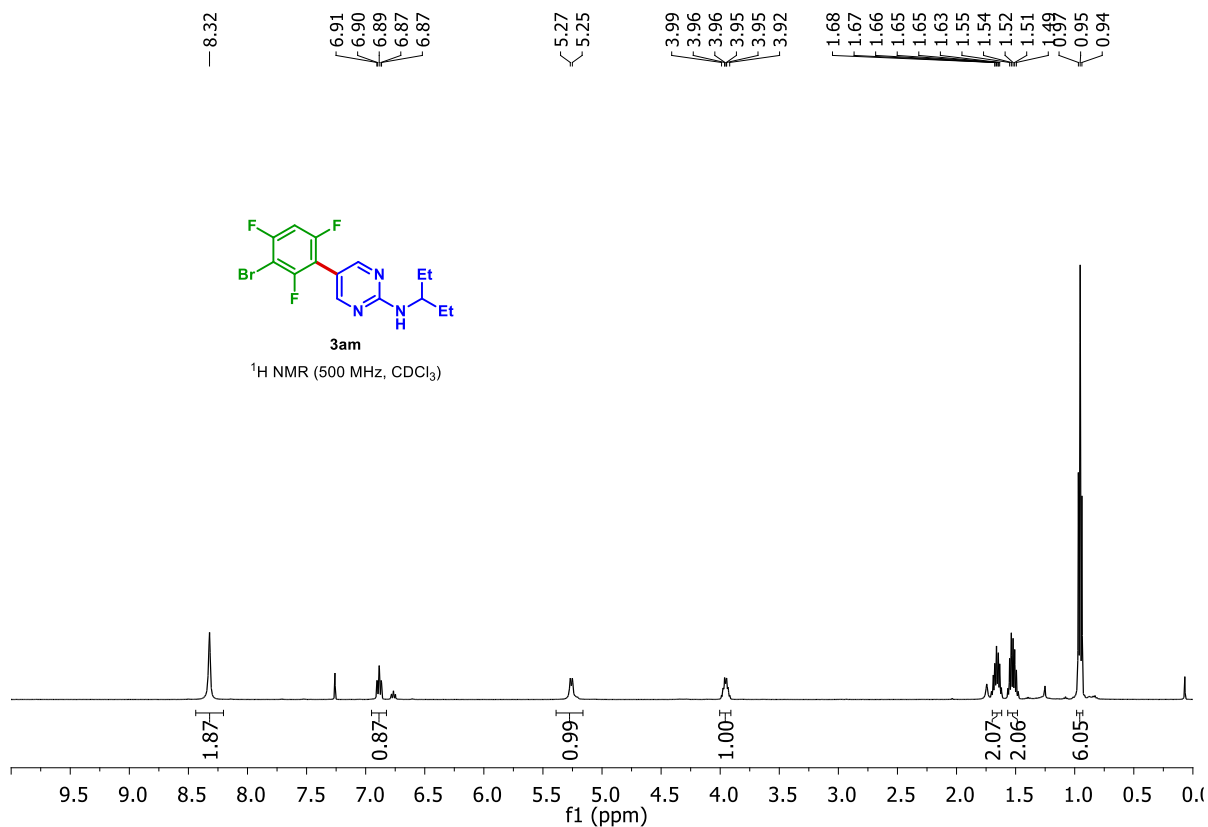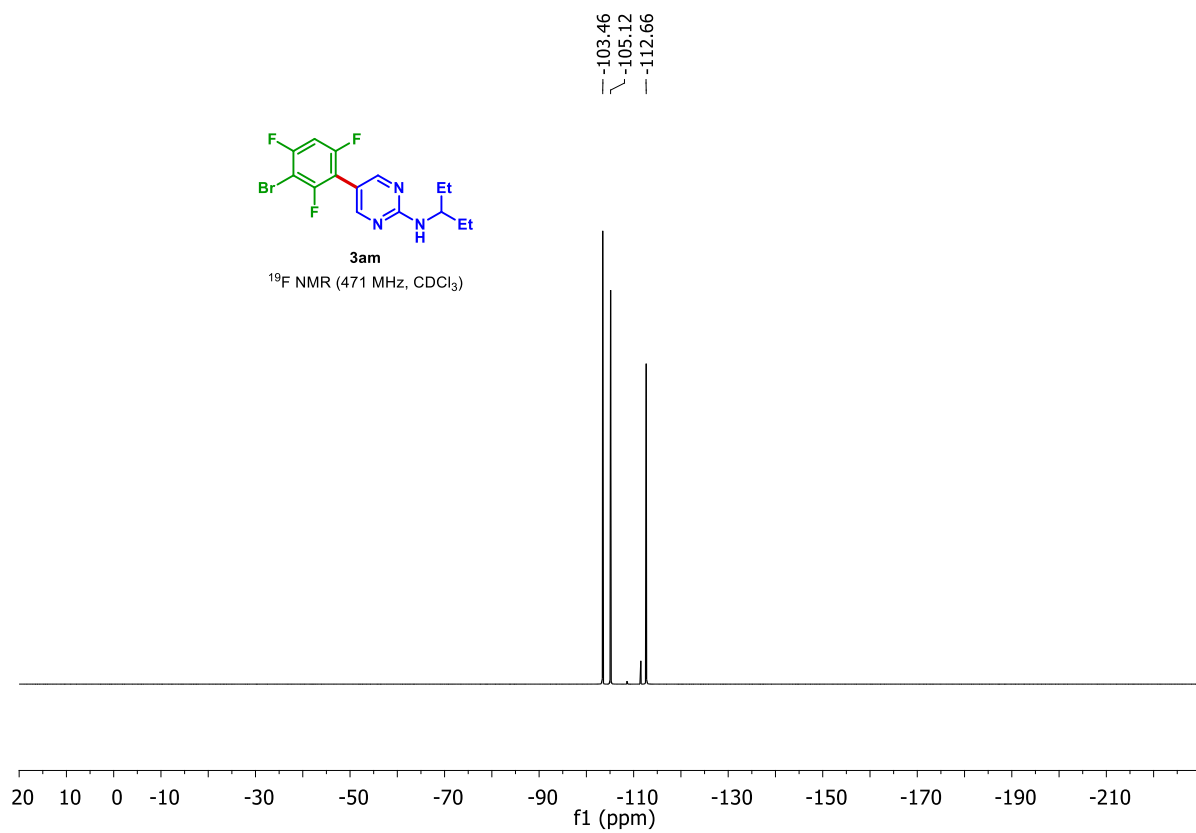

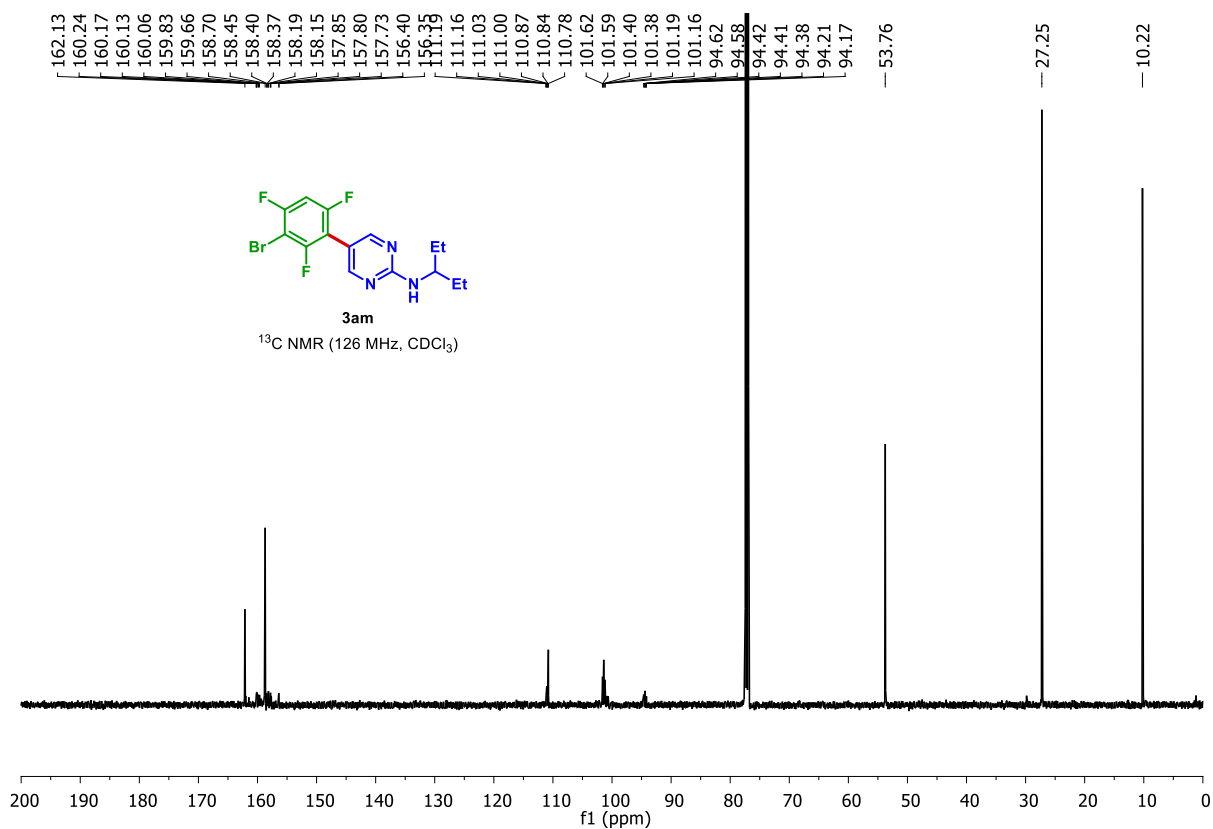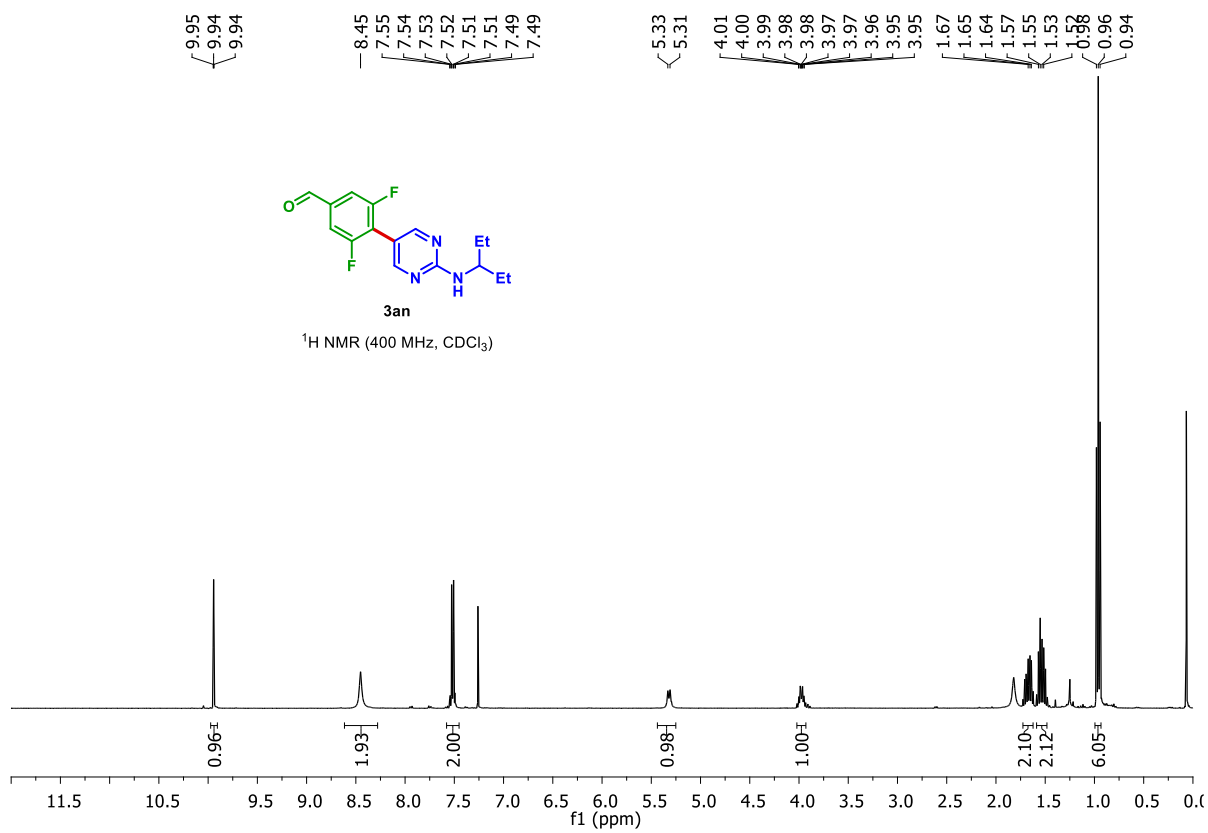

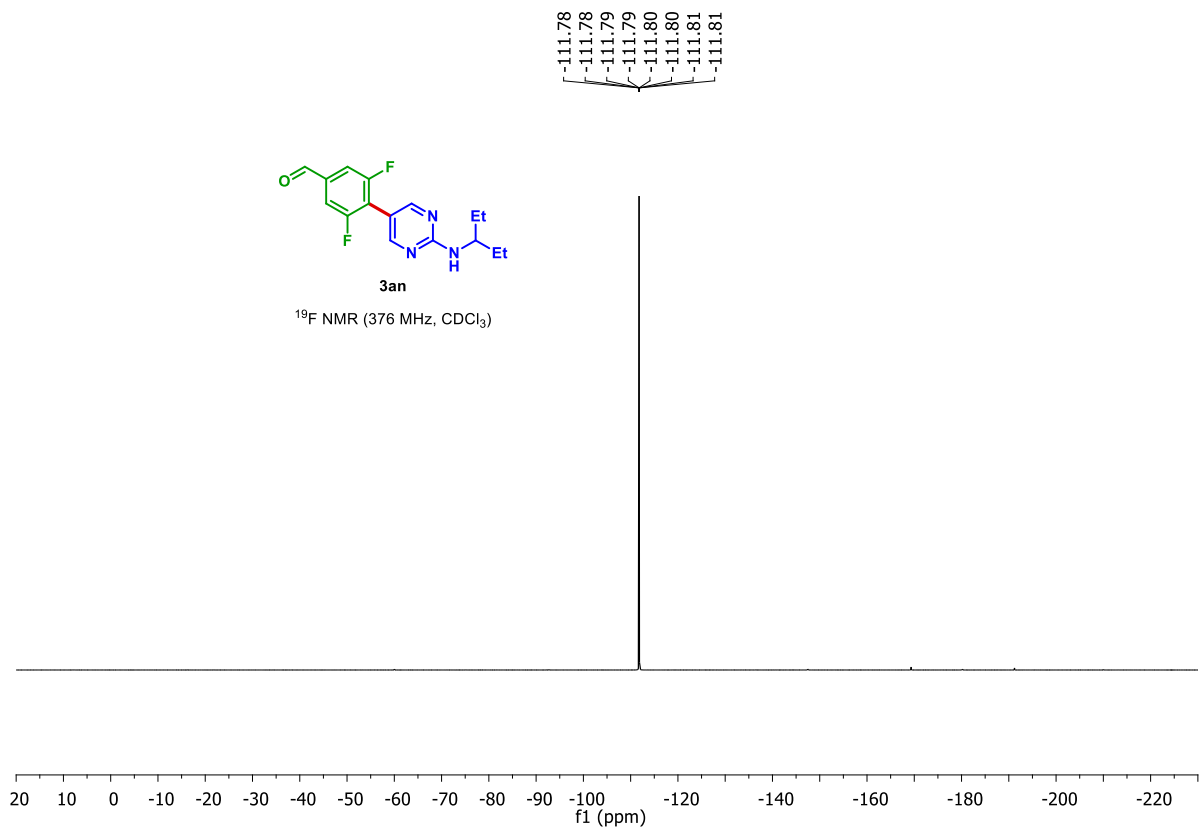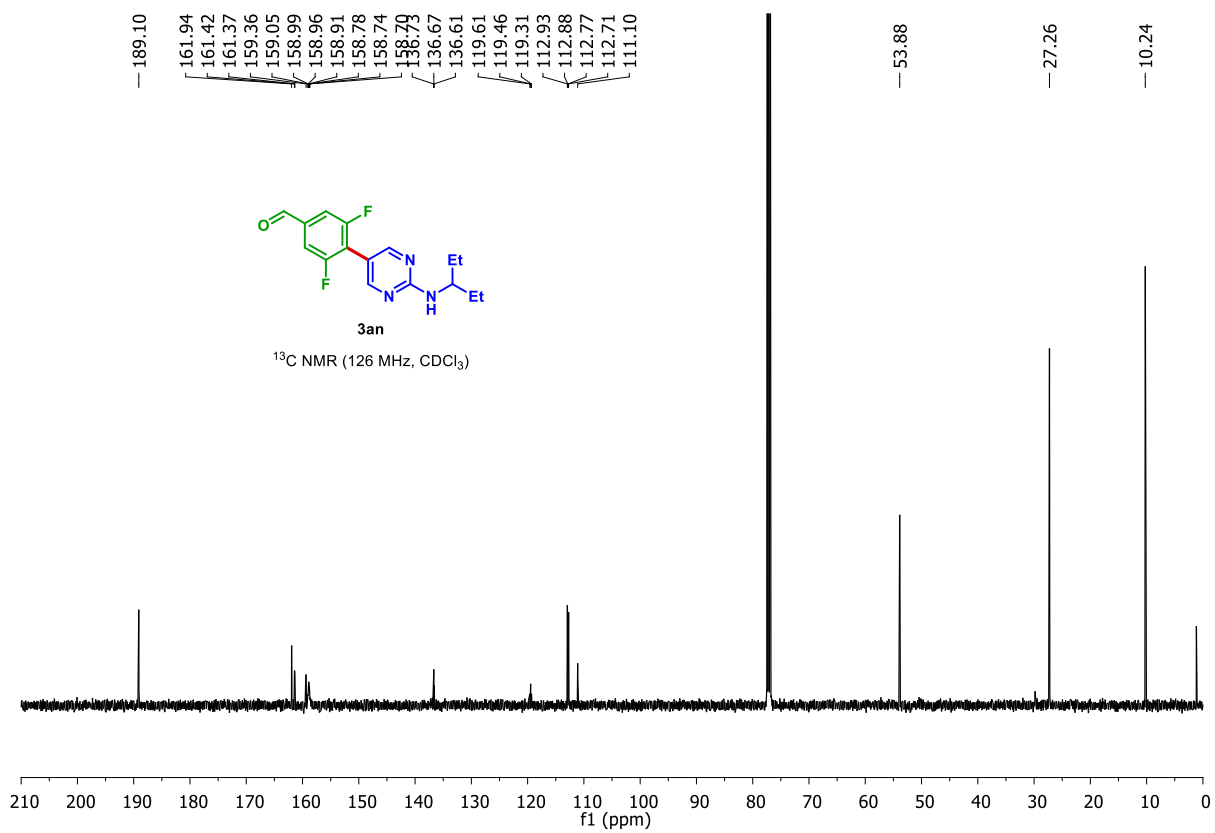

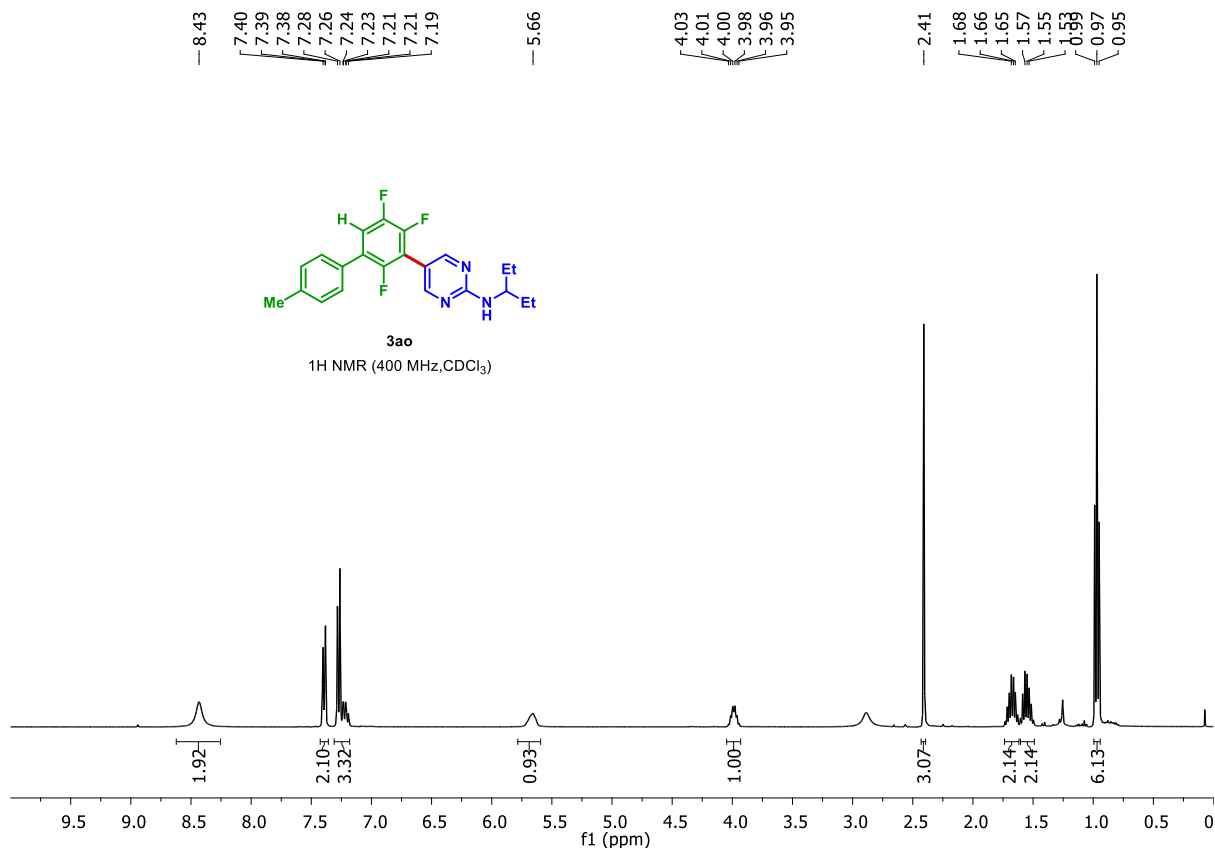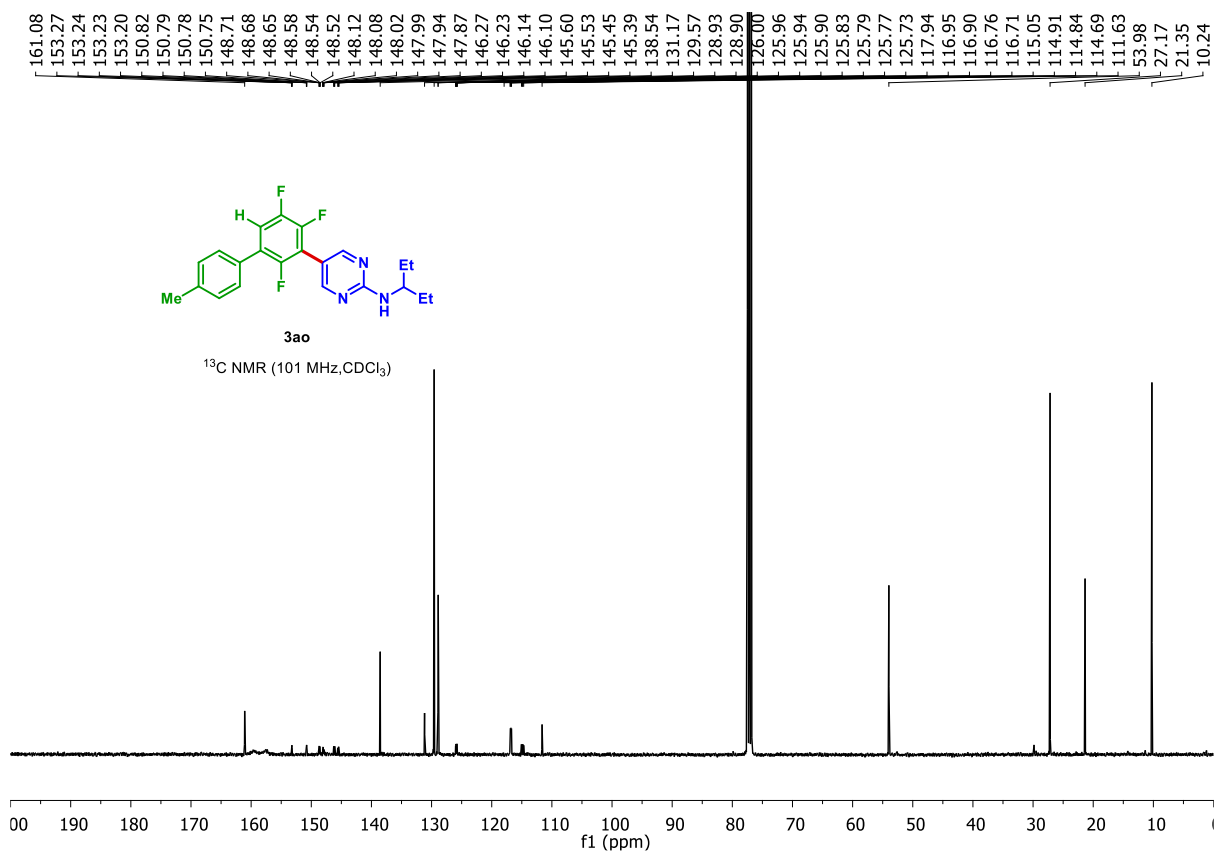



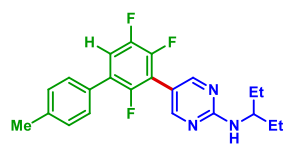

**3ao**

<sup>19</sup>F NMR (376 MHz, CDCl<sub>3</sub>)

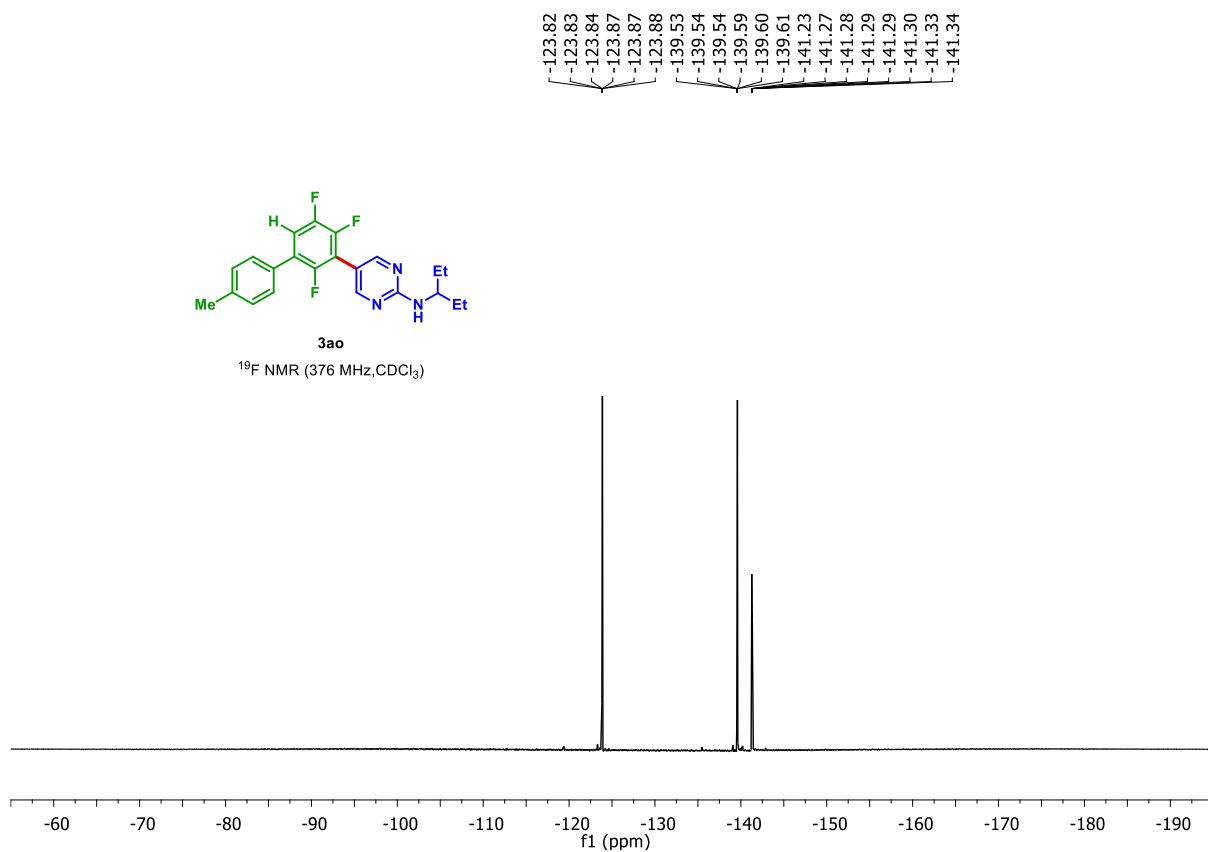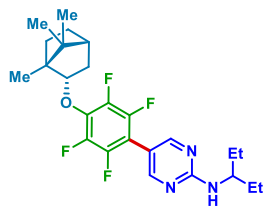

**3ap**

<sup>1</sup>H NMR (400 MHz, CDCl<sub>3</sub>)

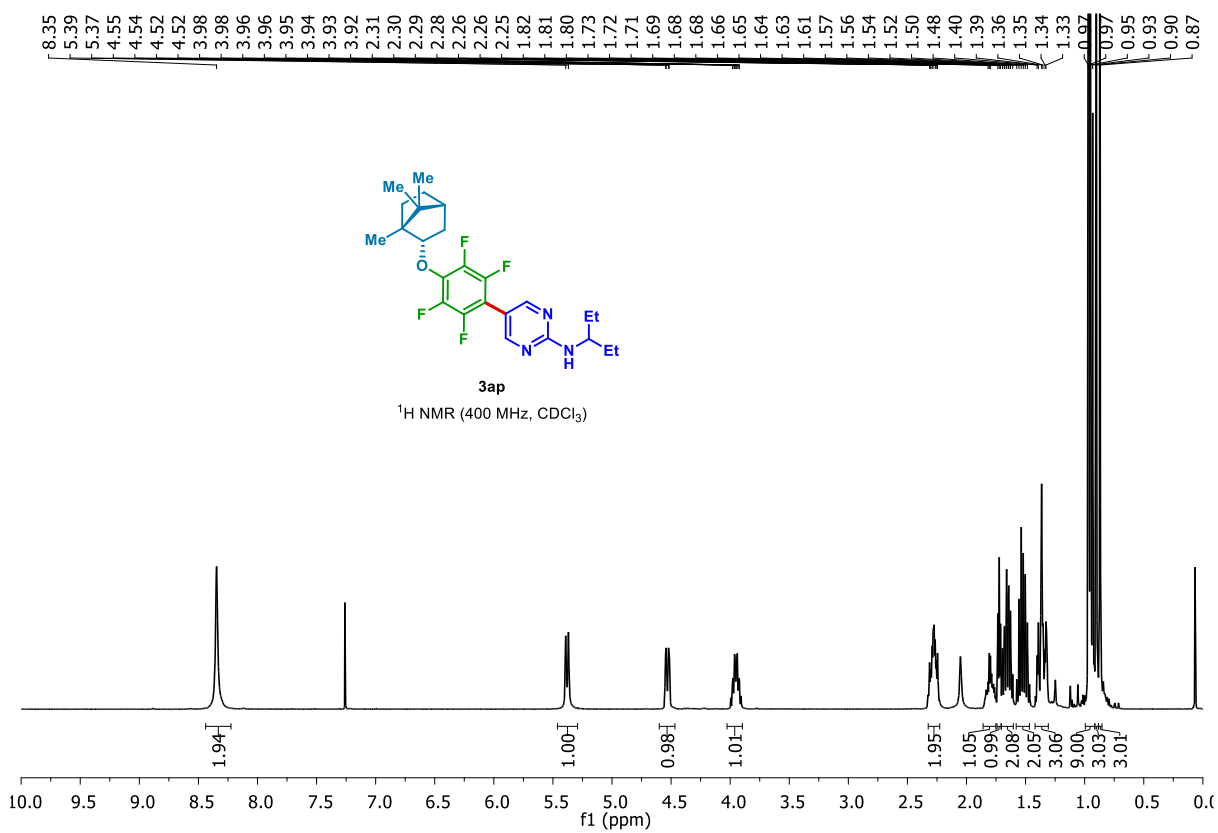

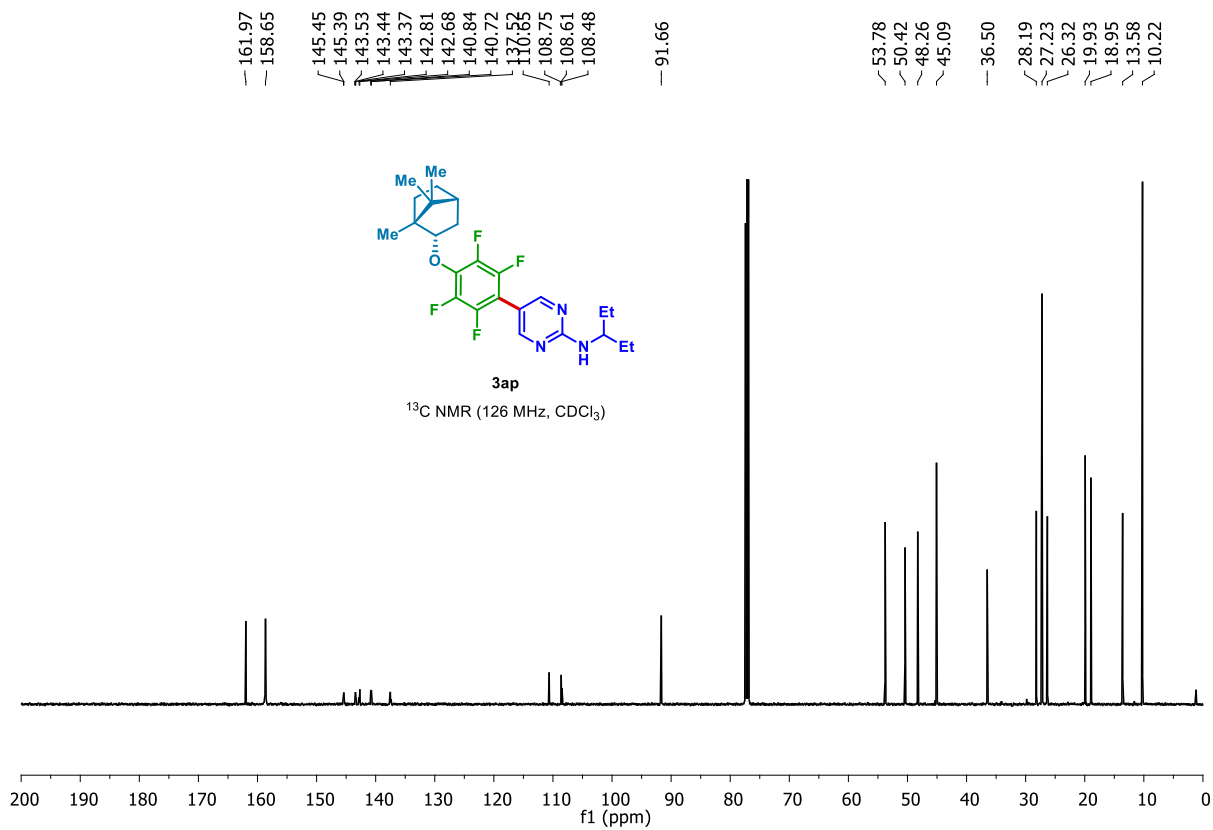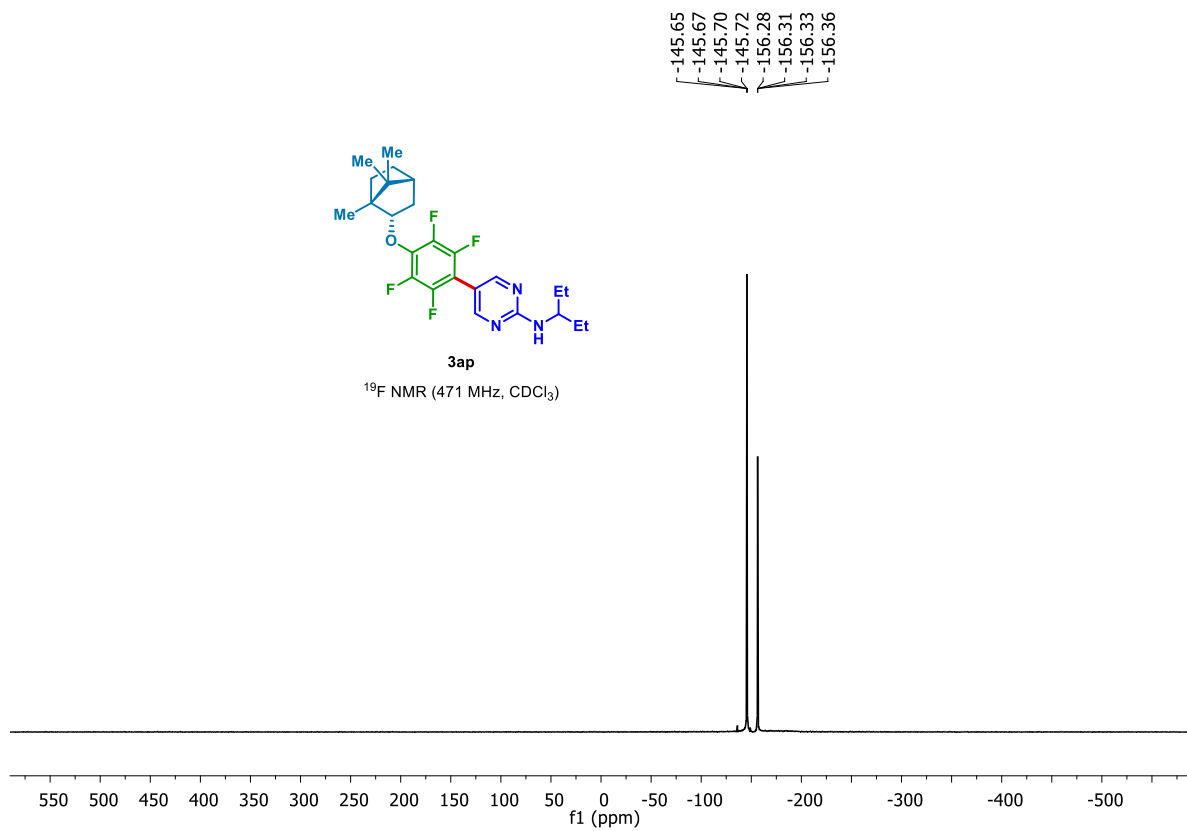

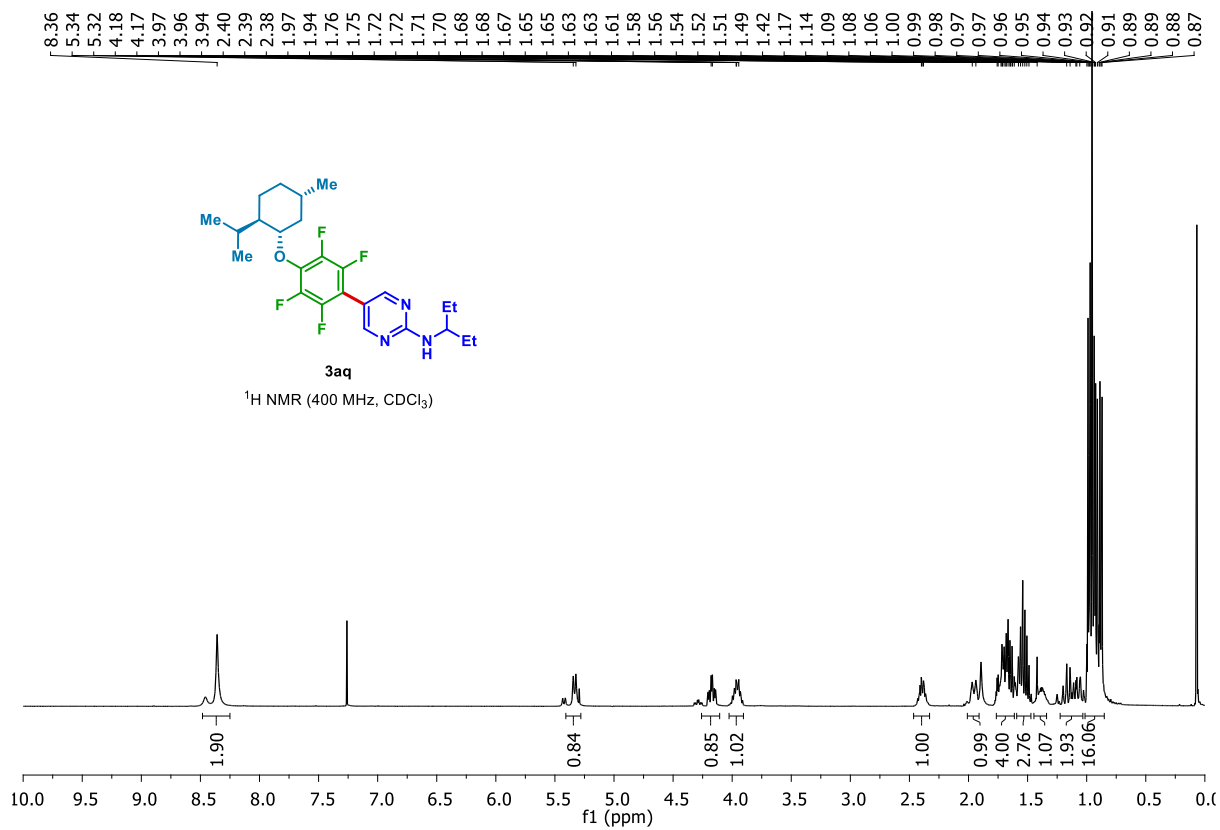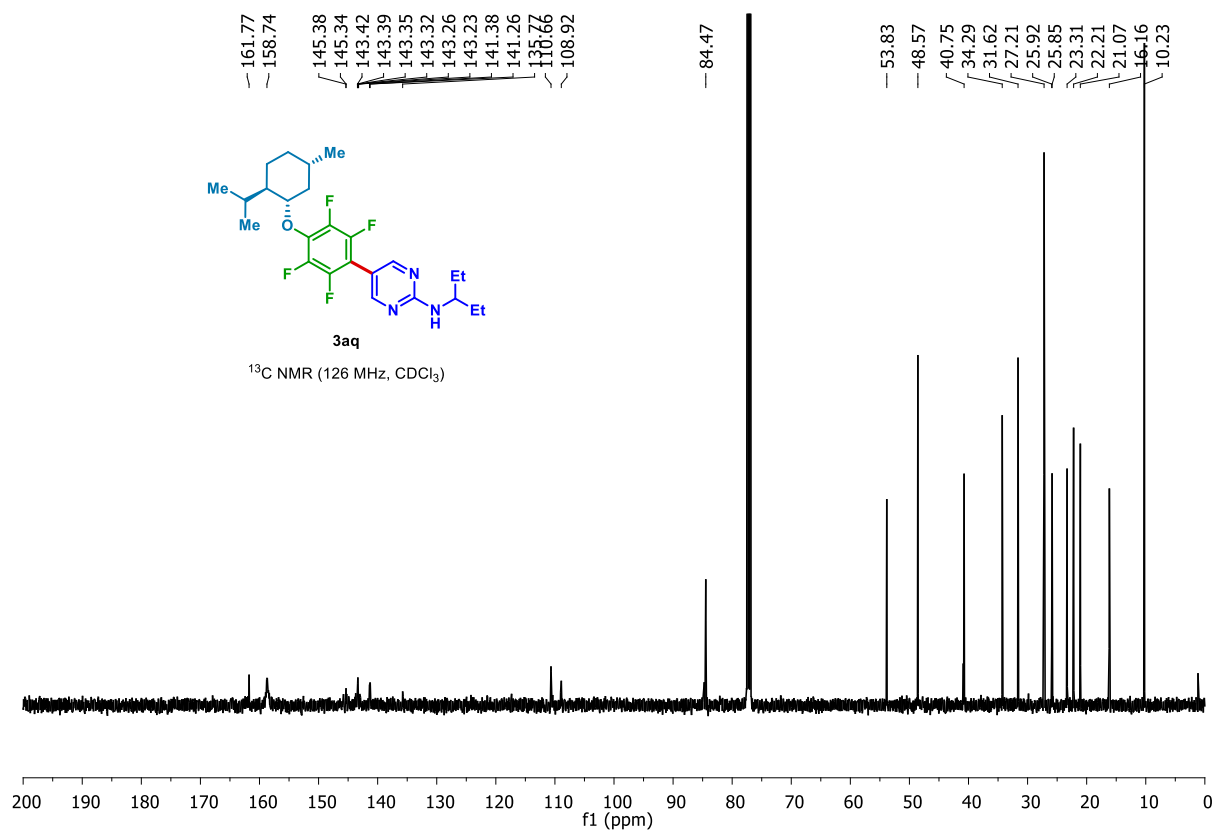

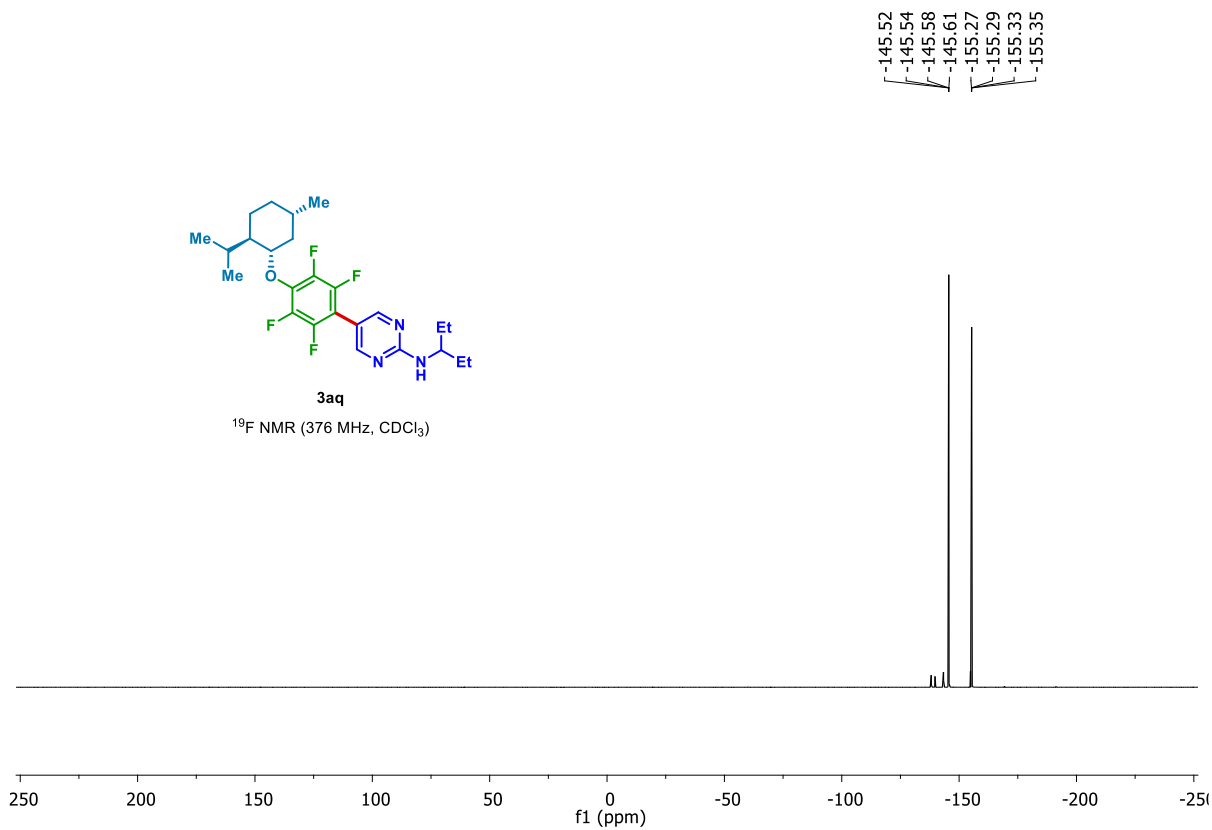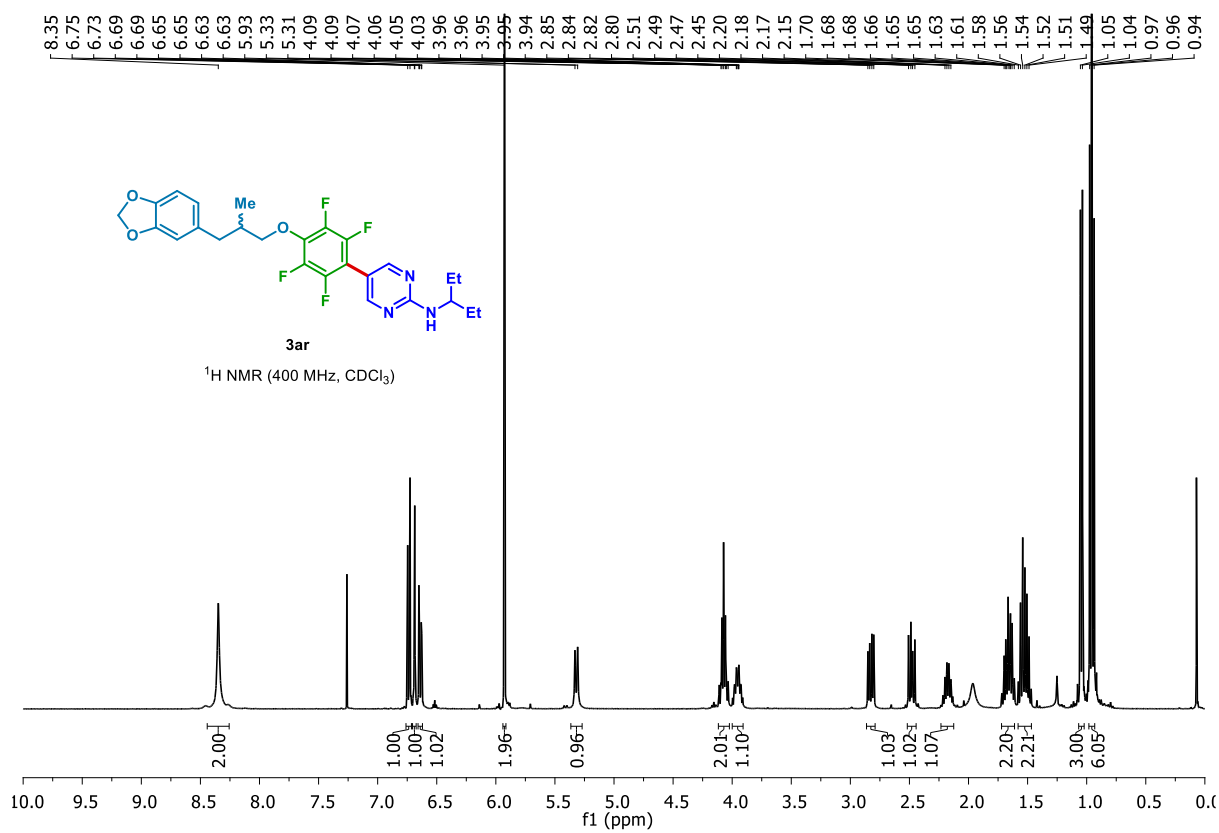

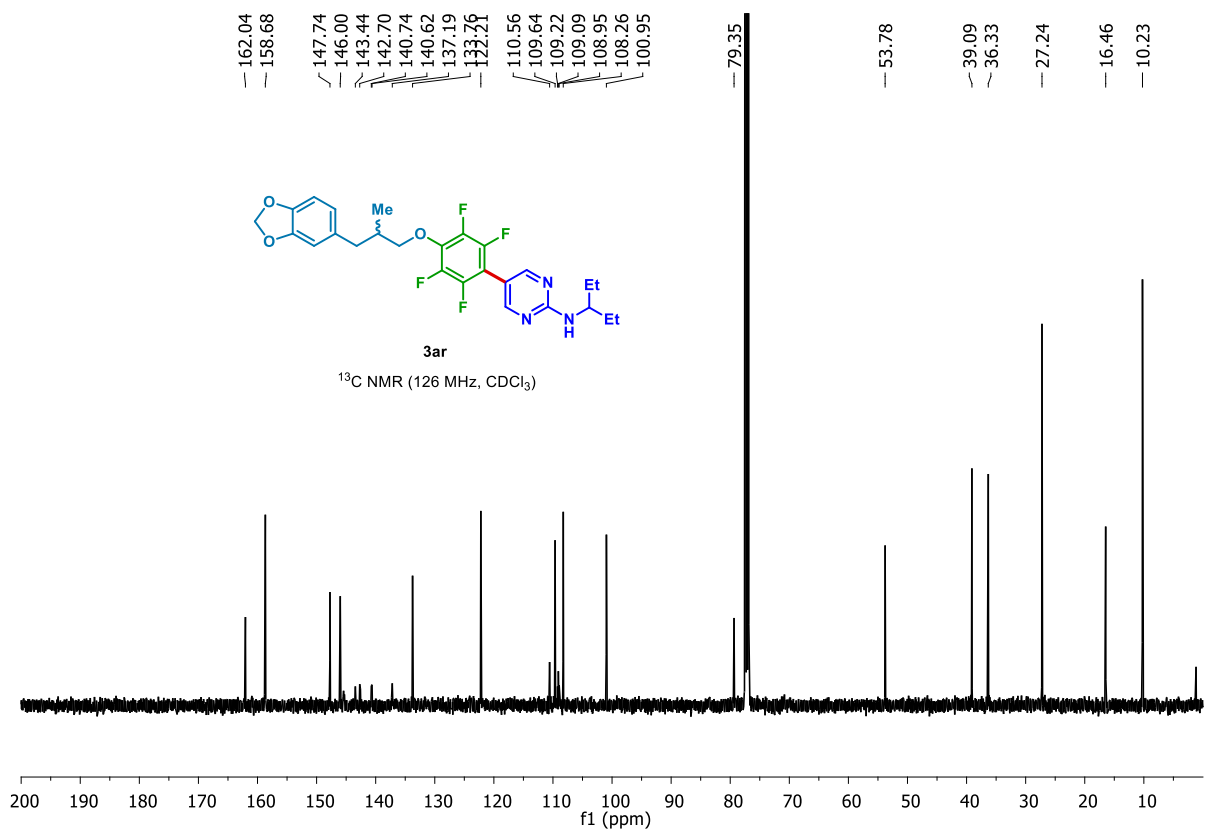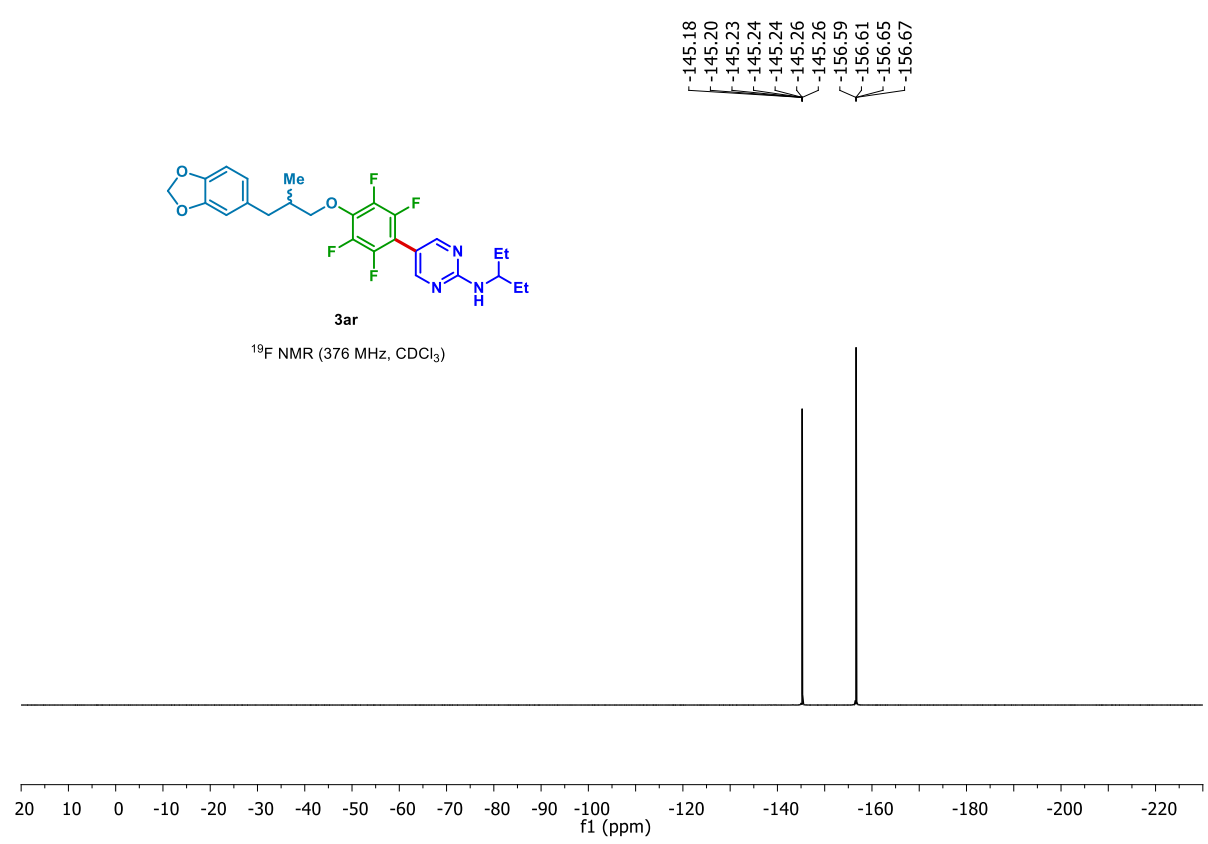

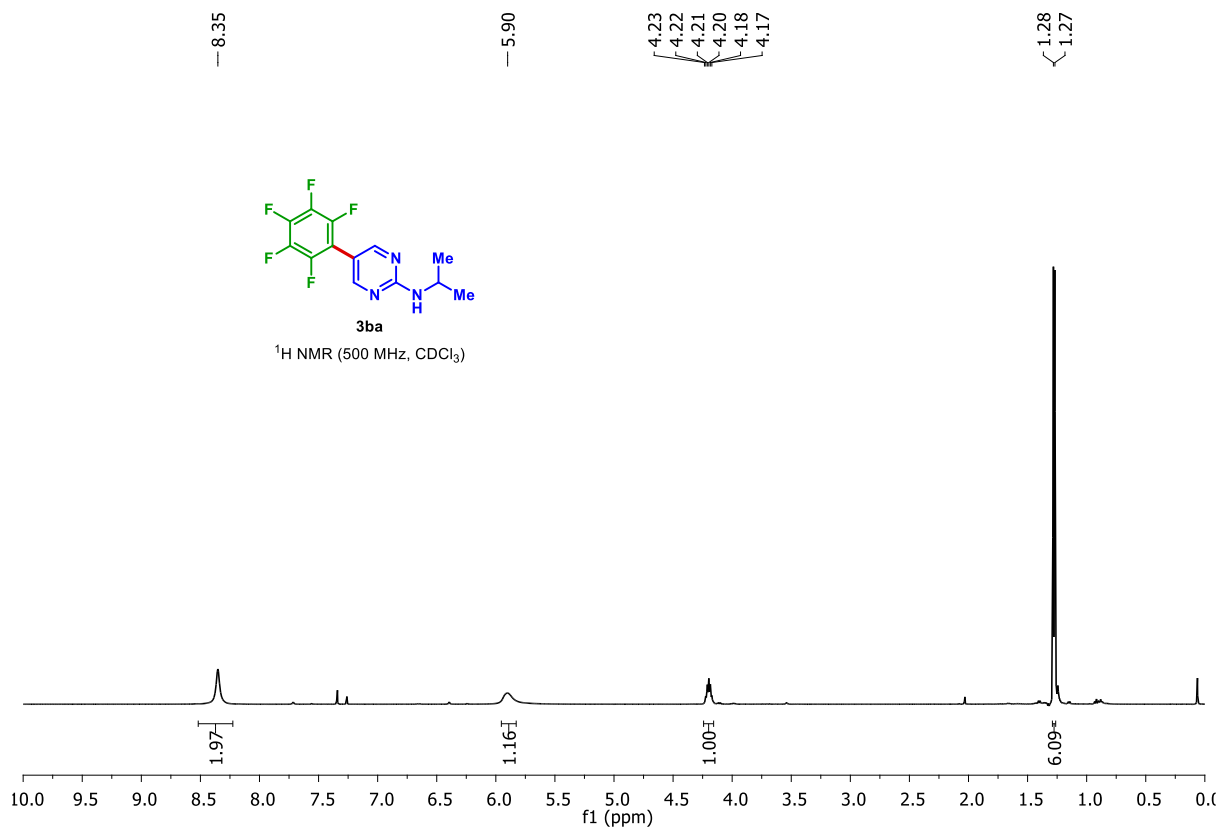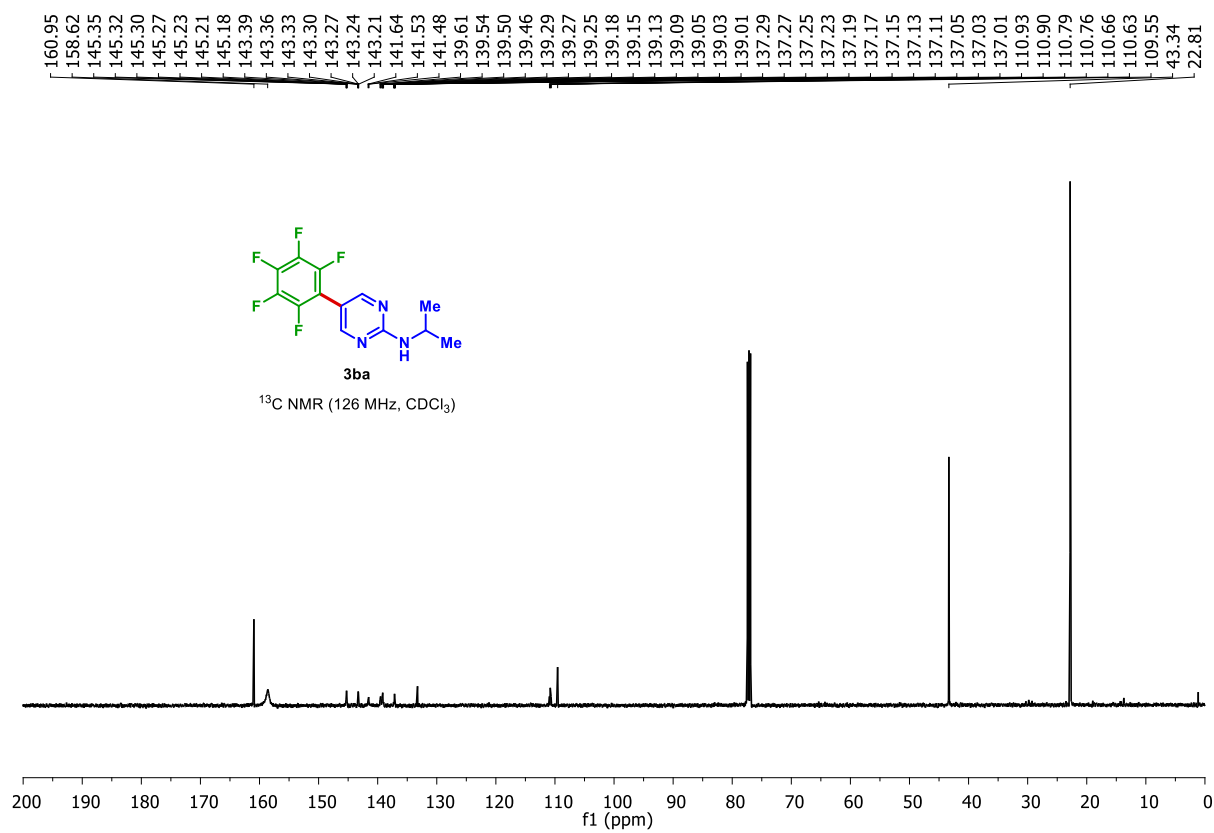

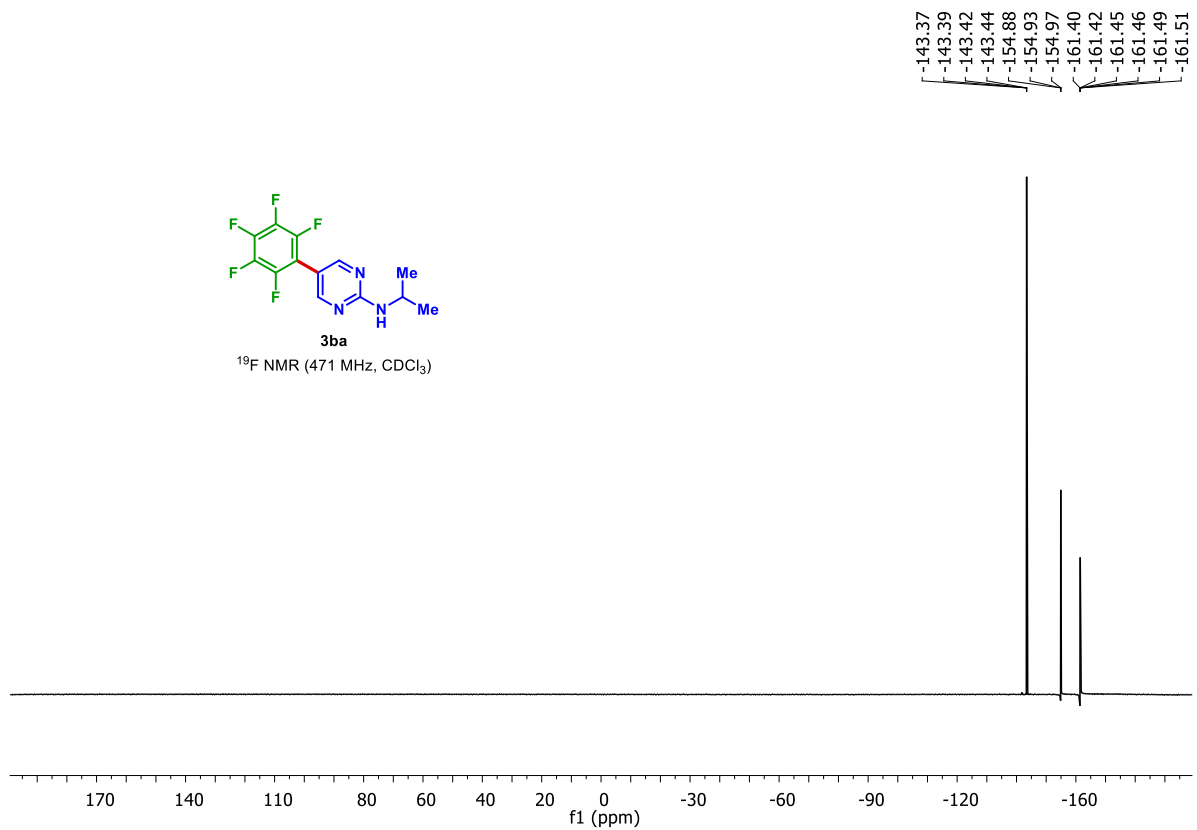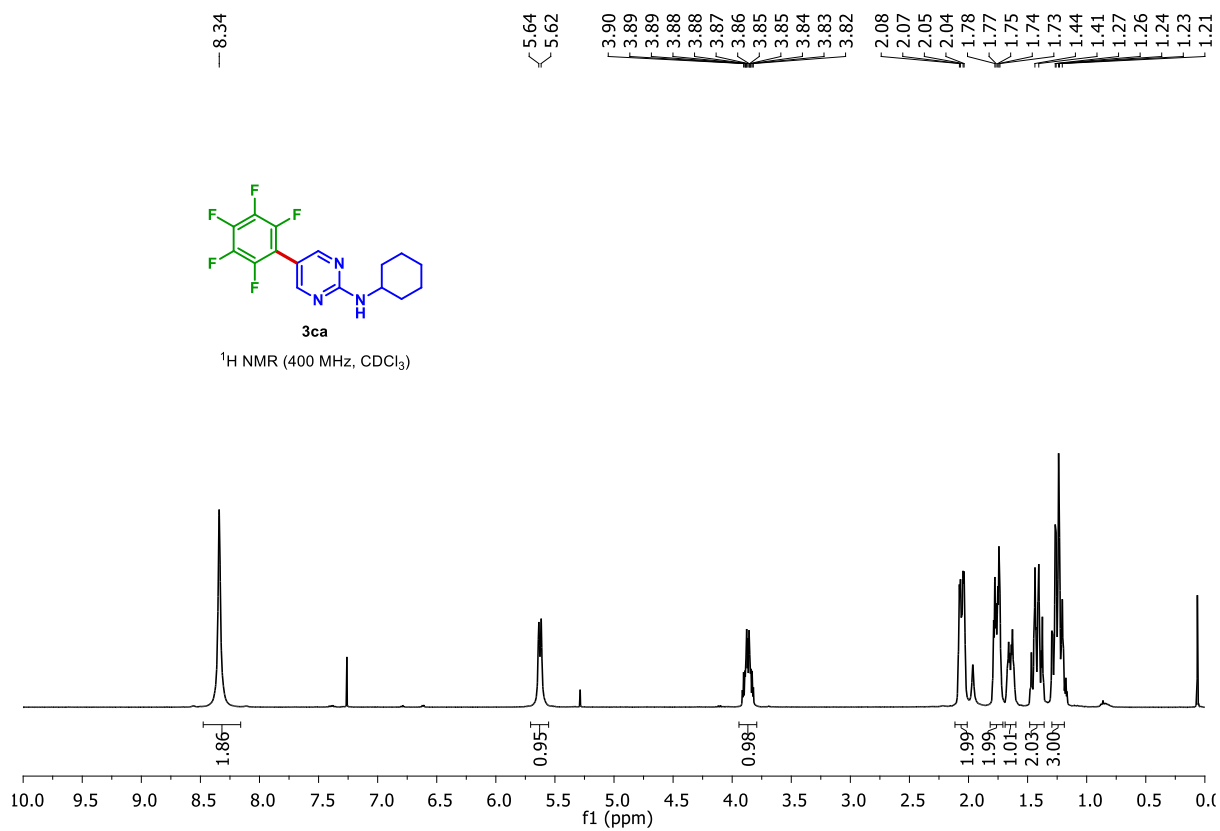

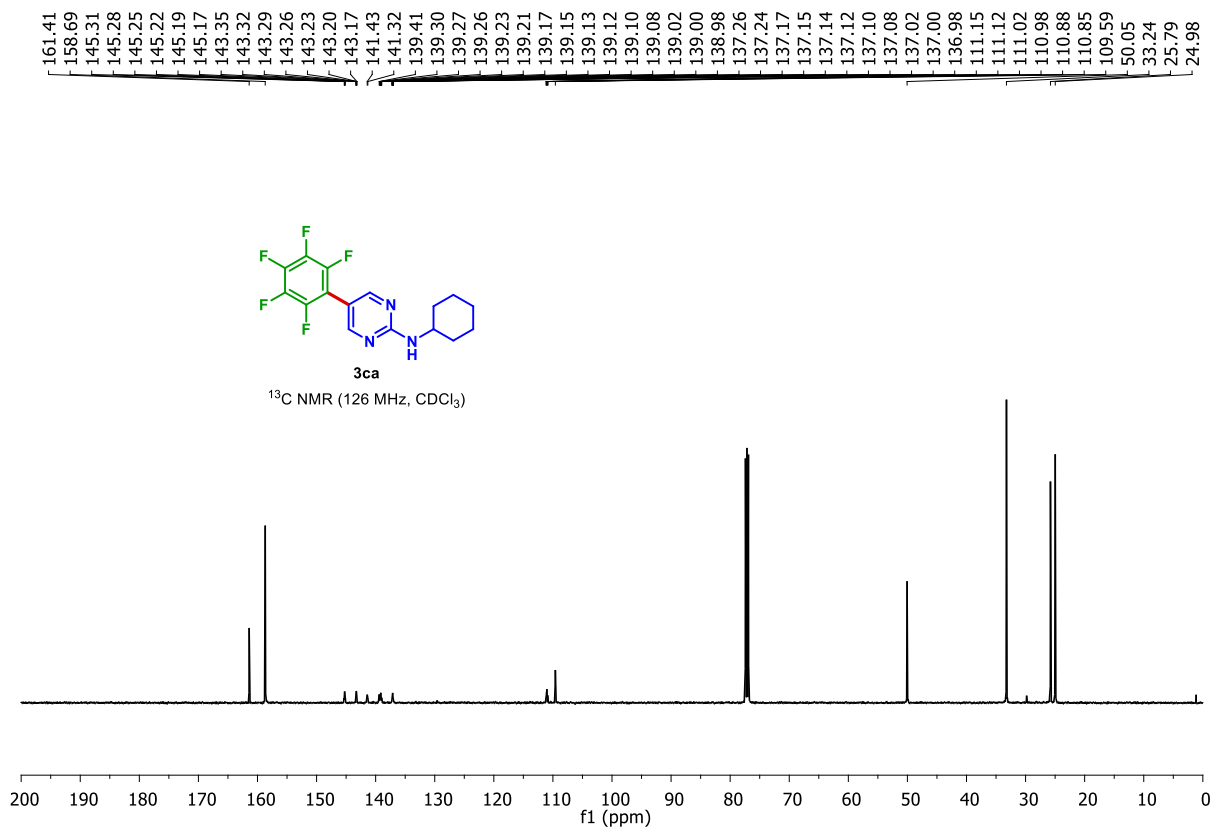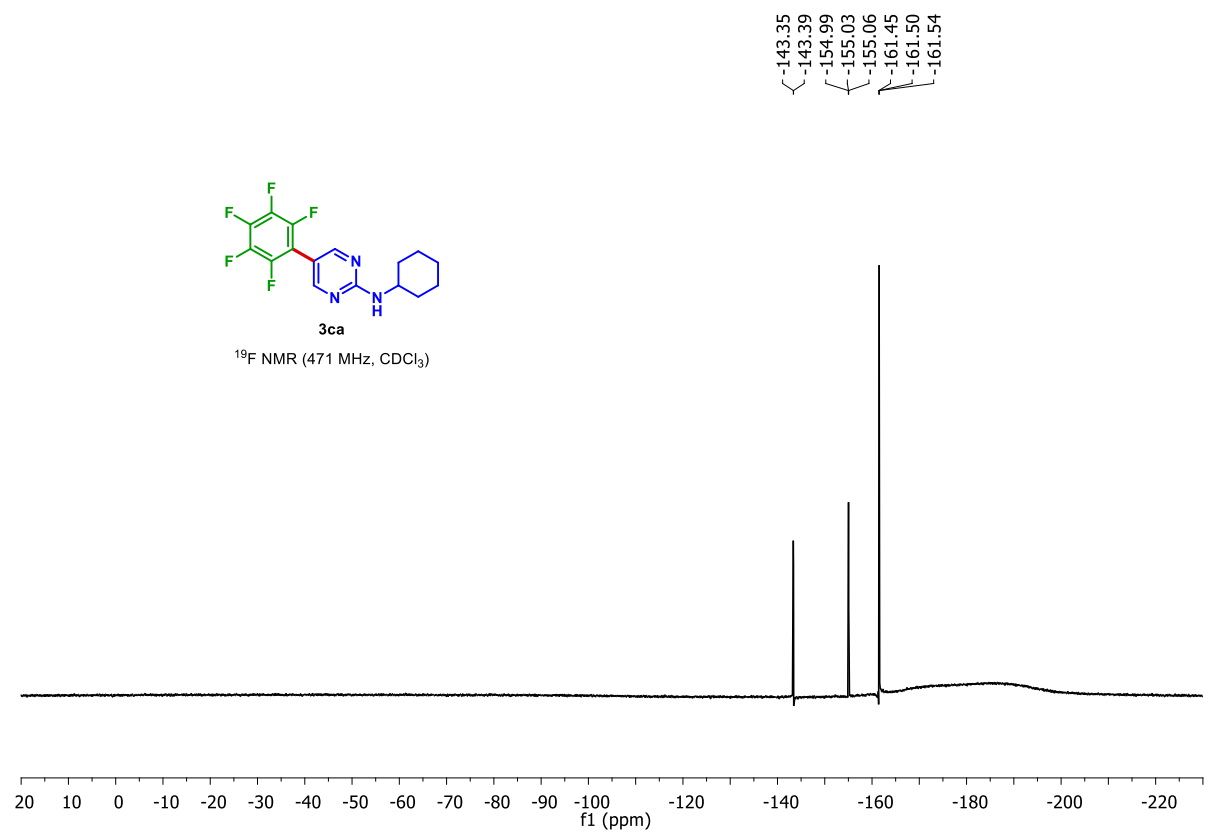



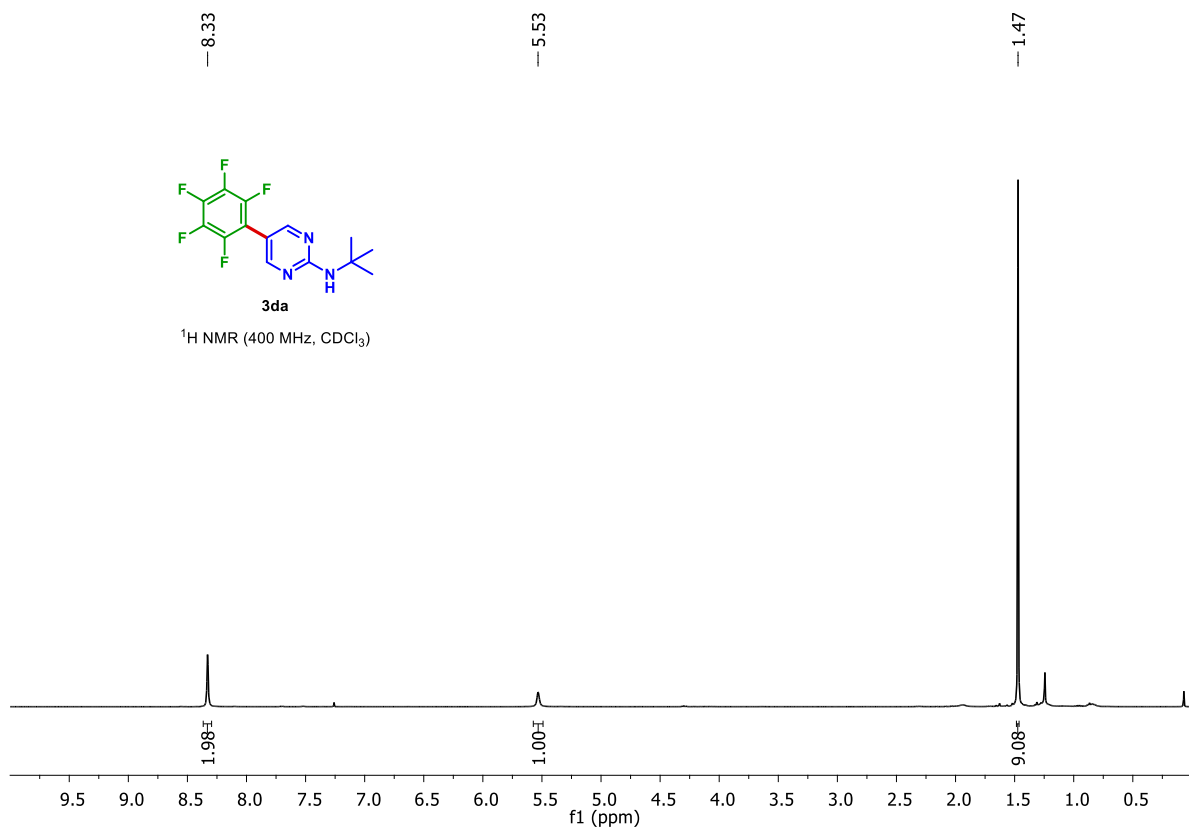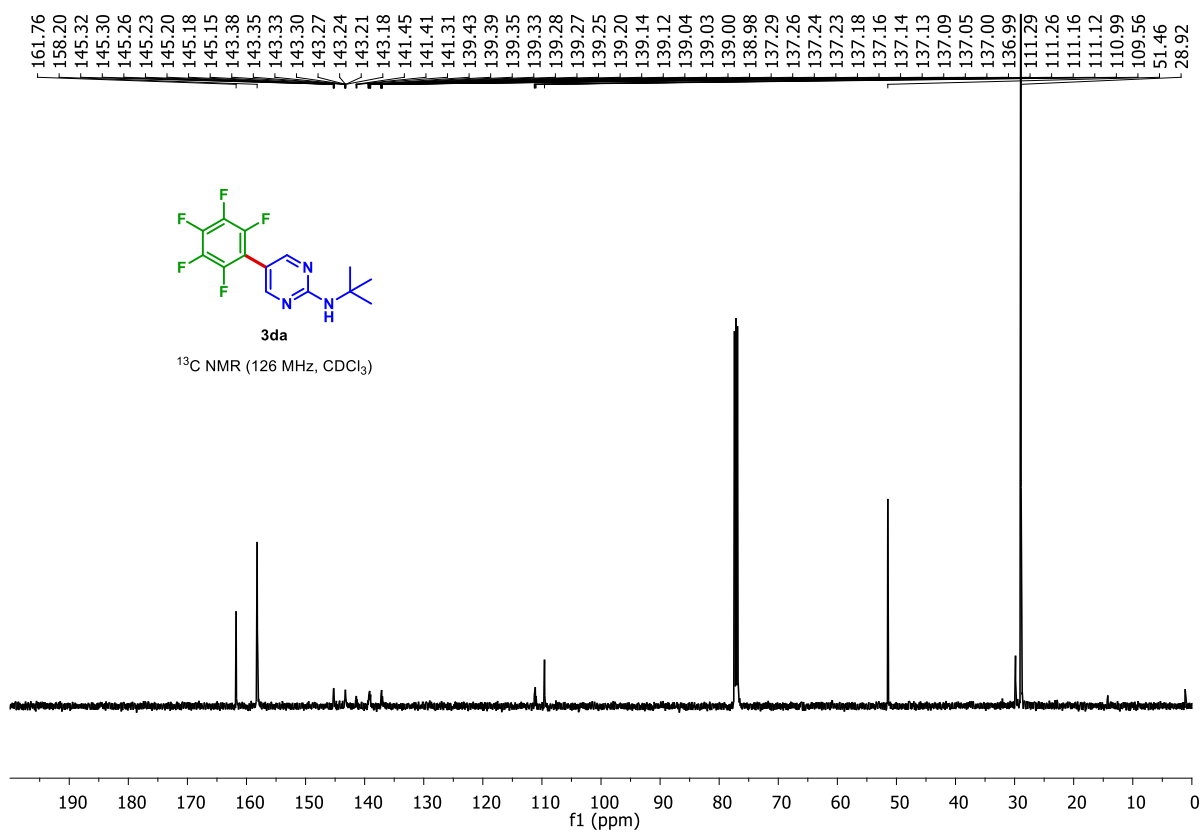

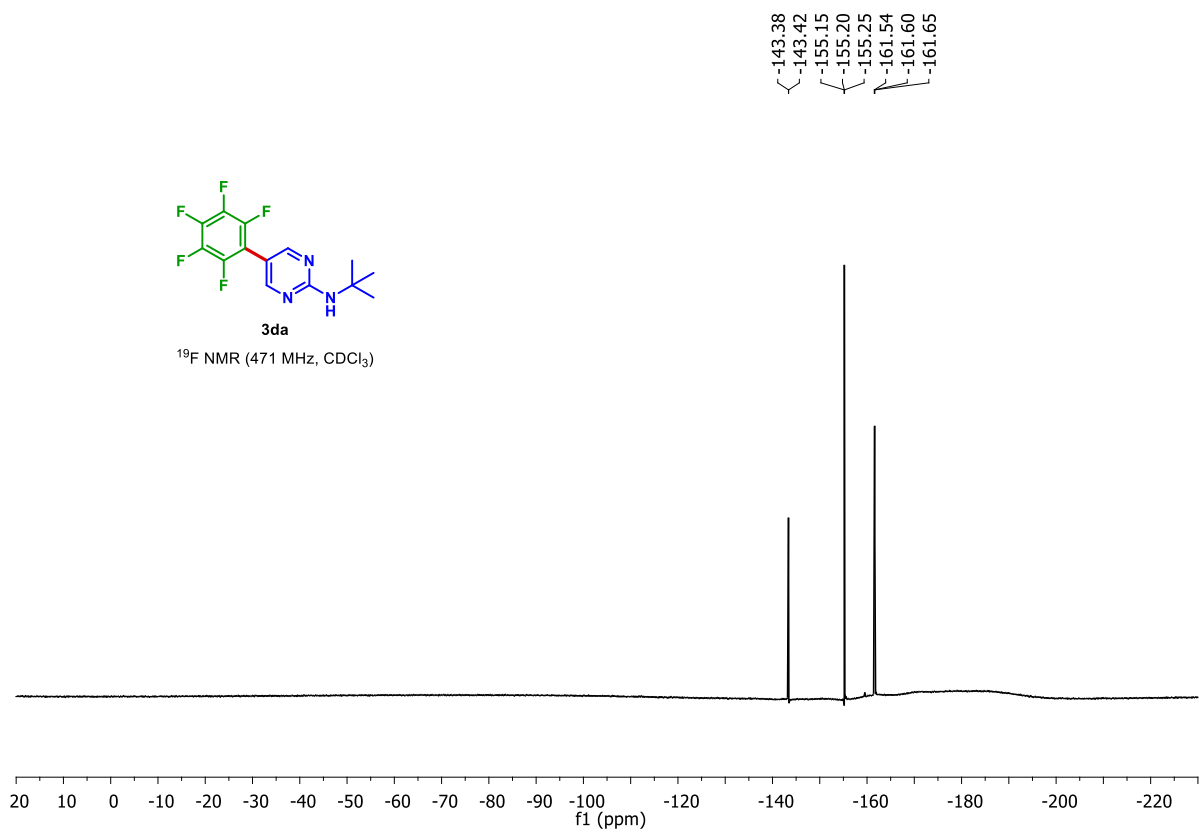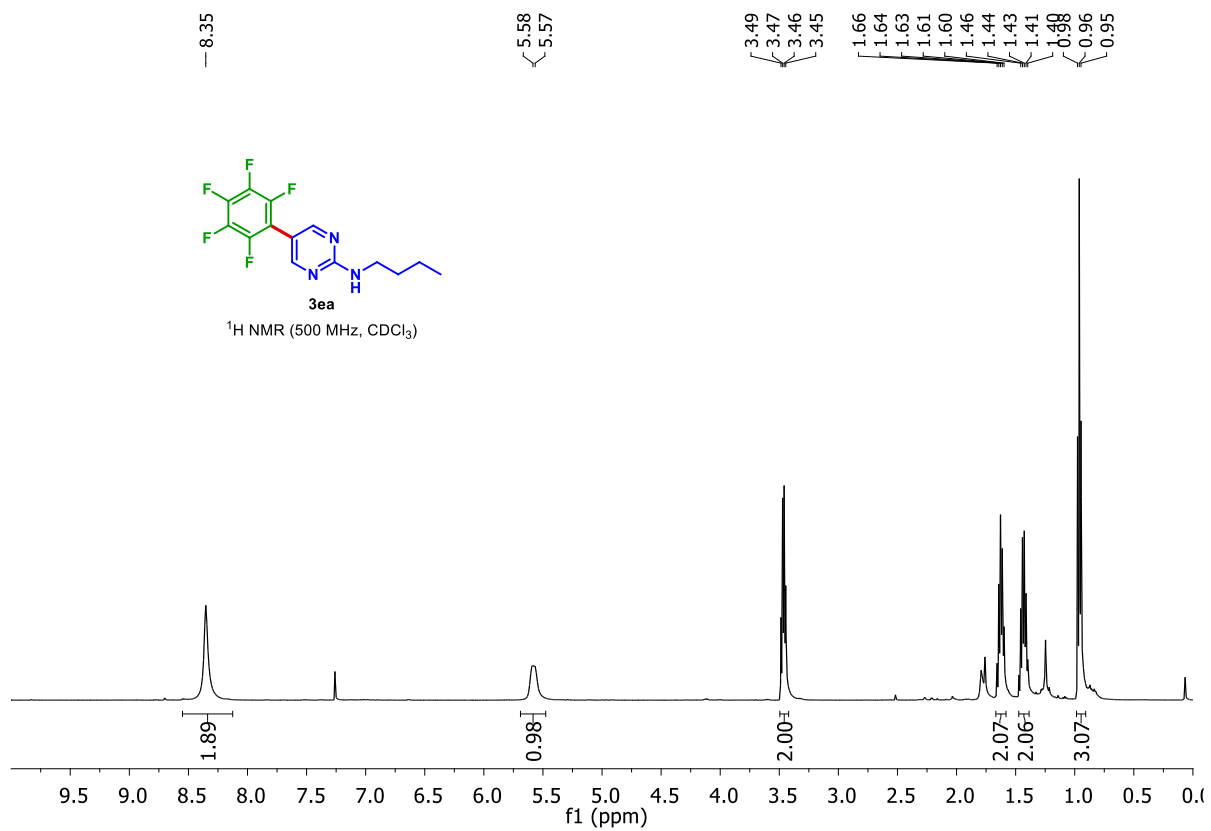

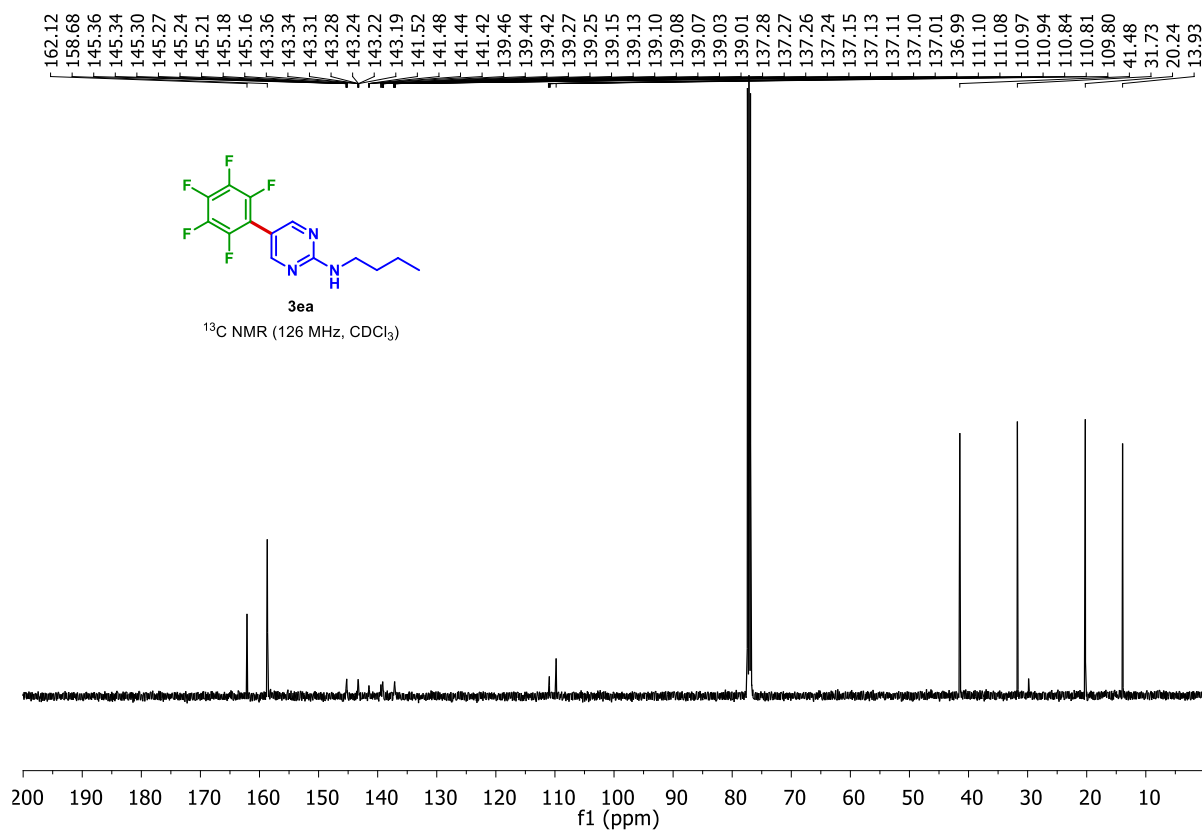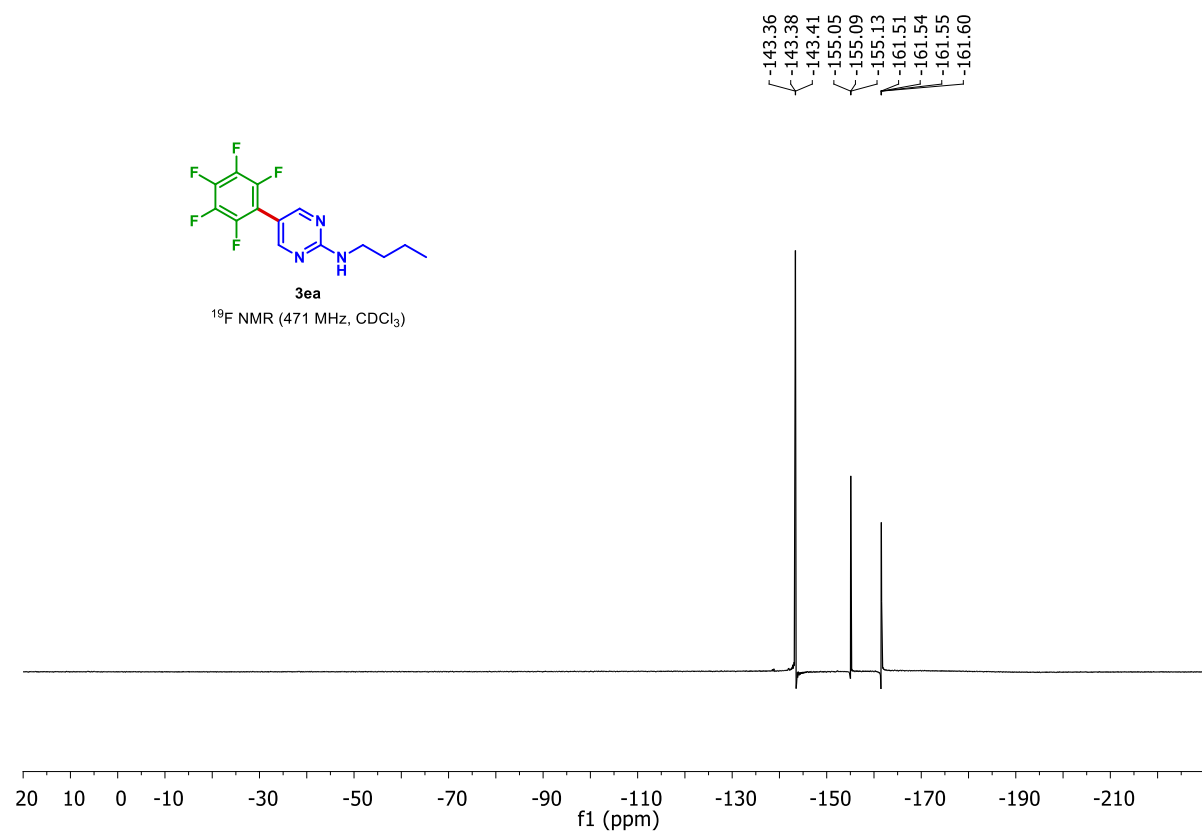

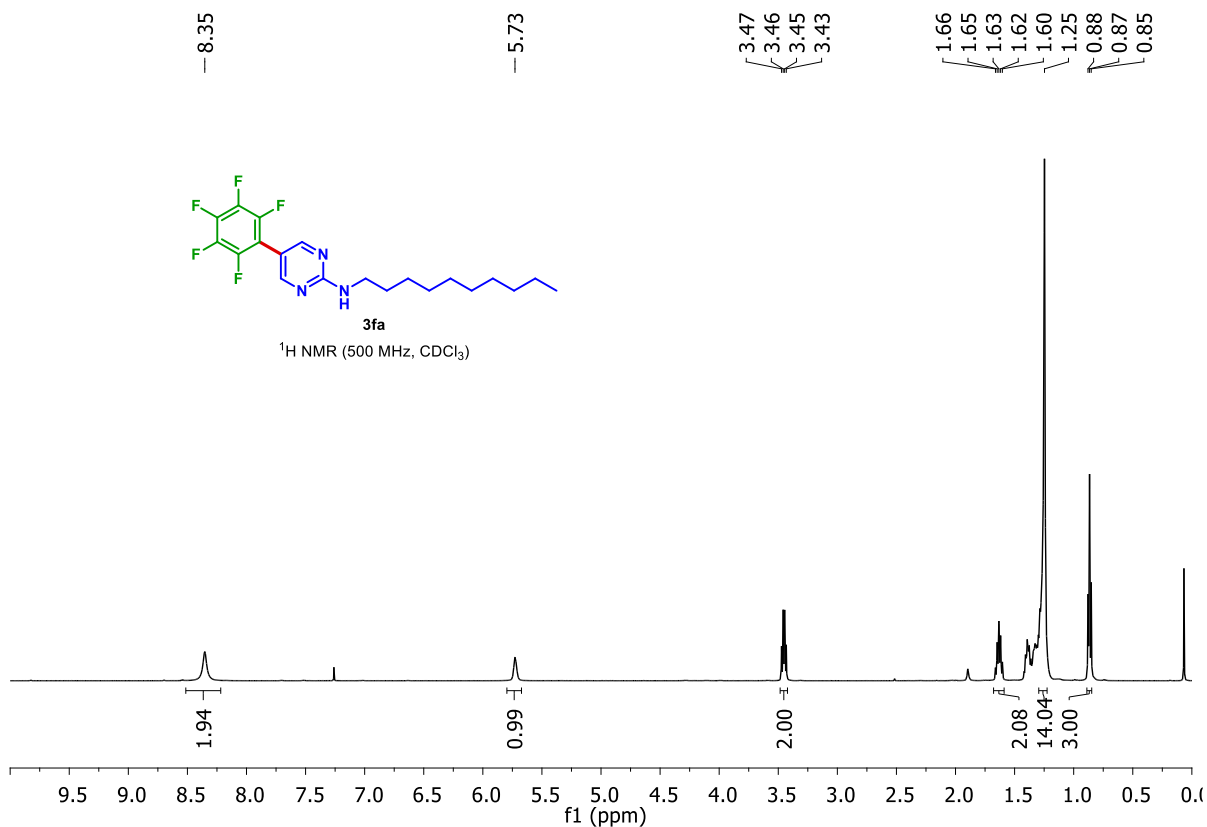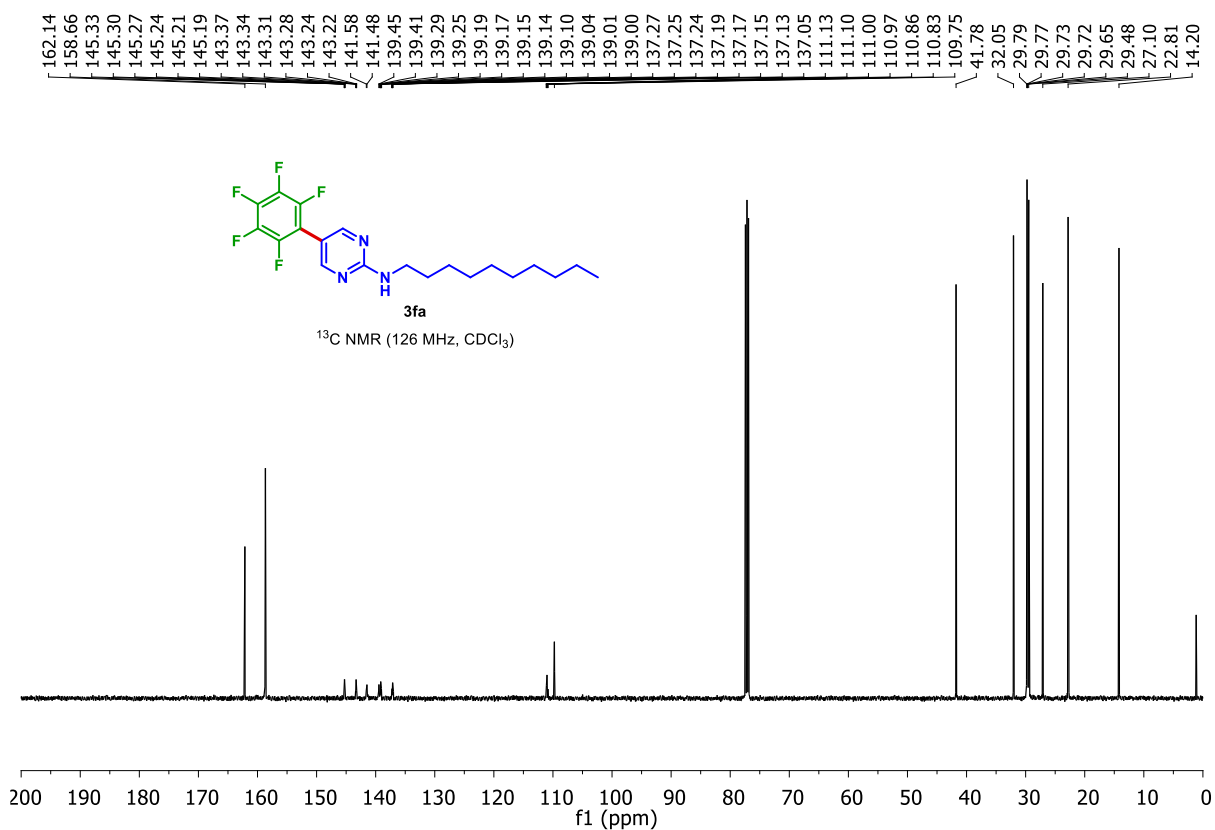

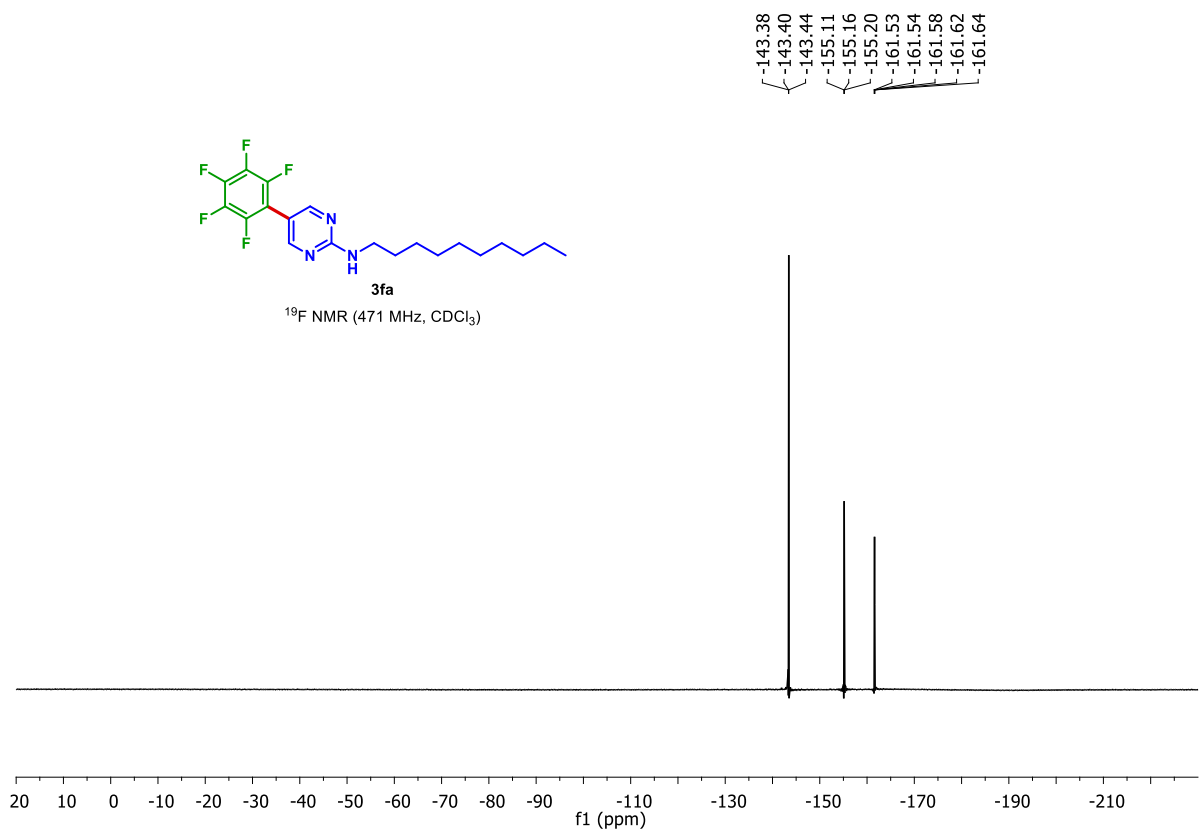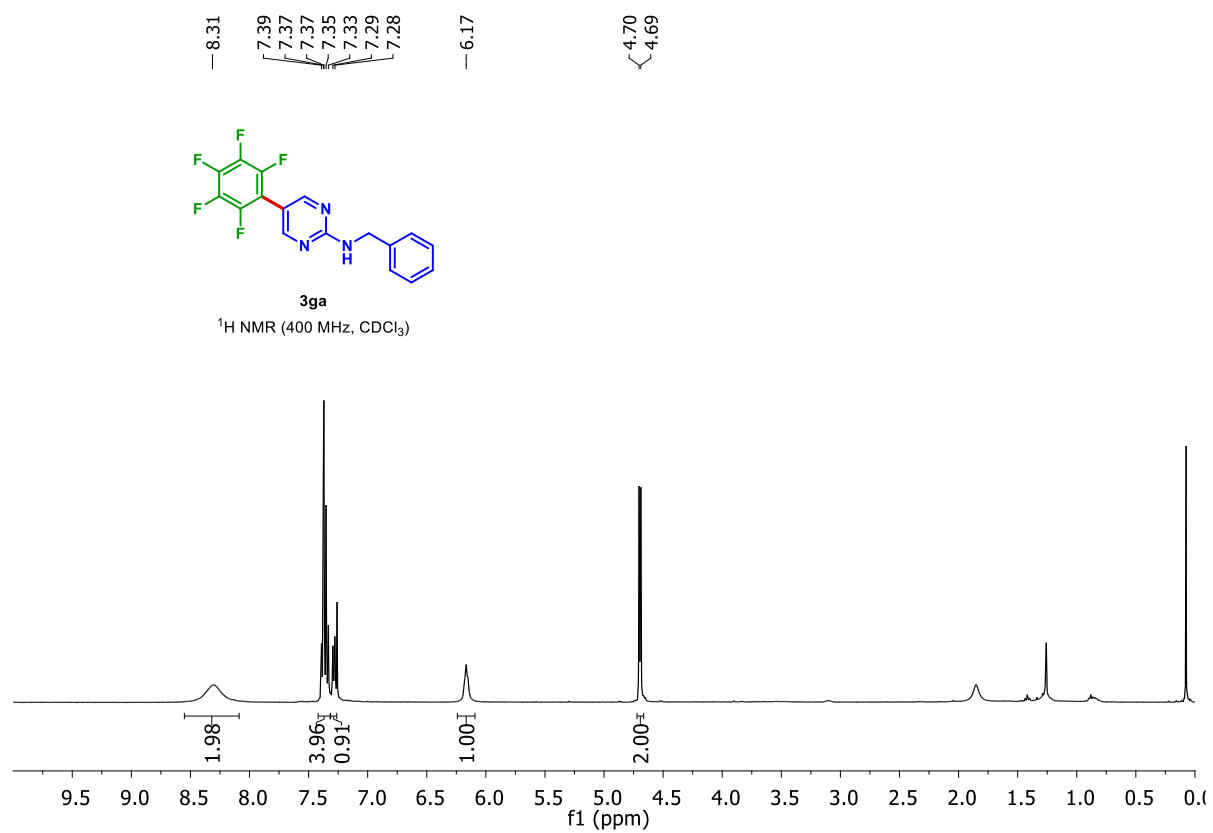

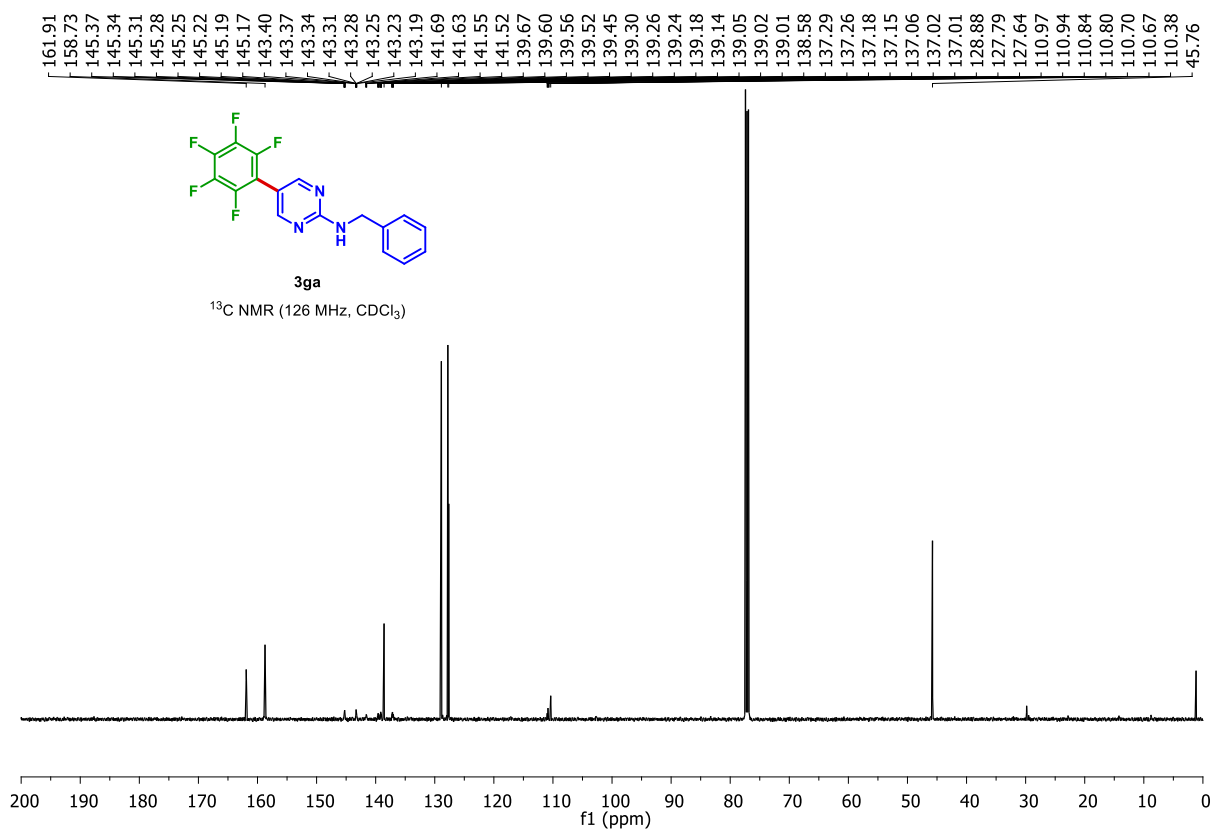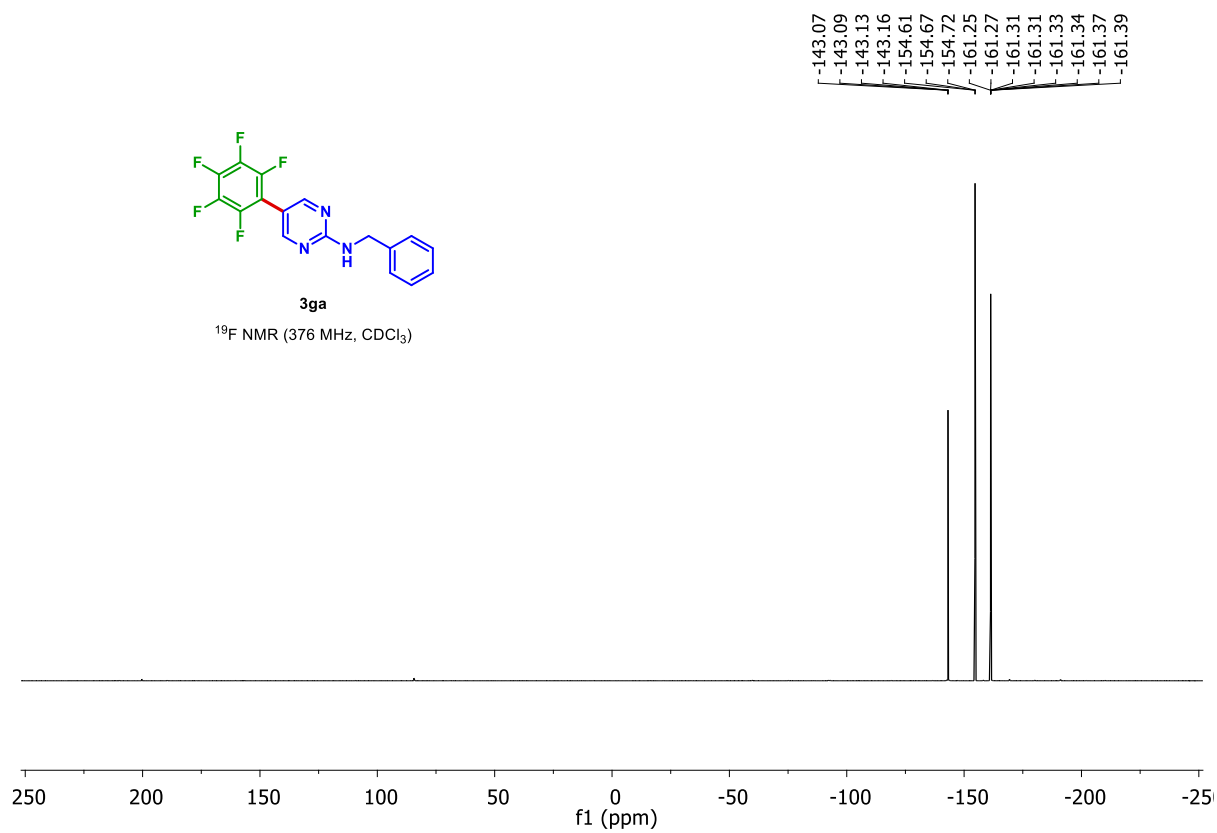

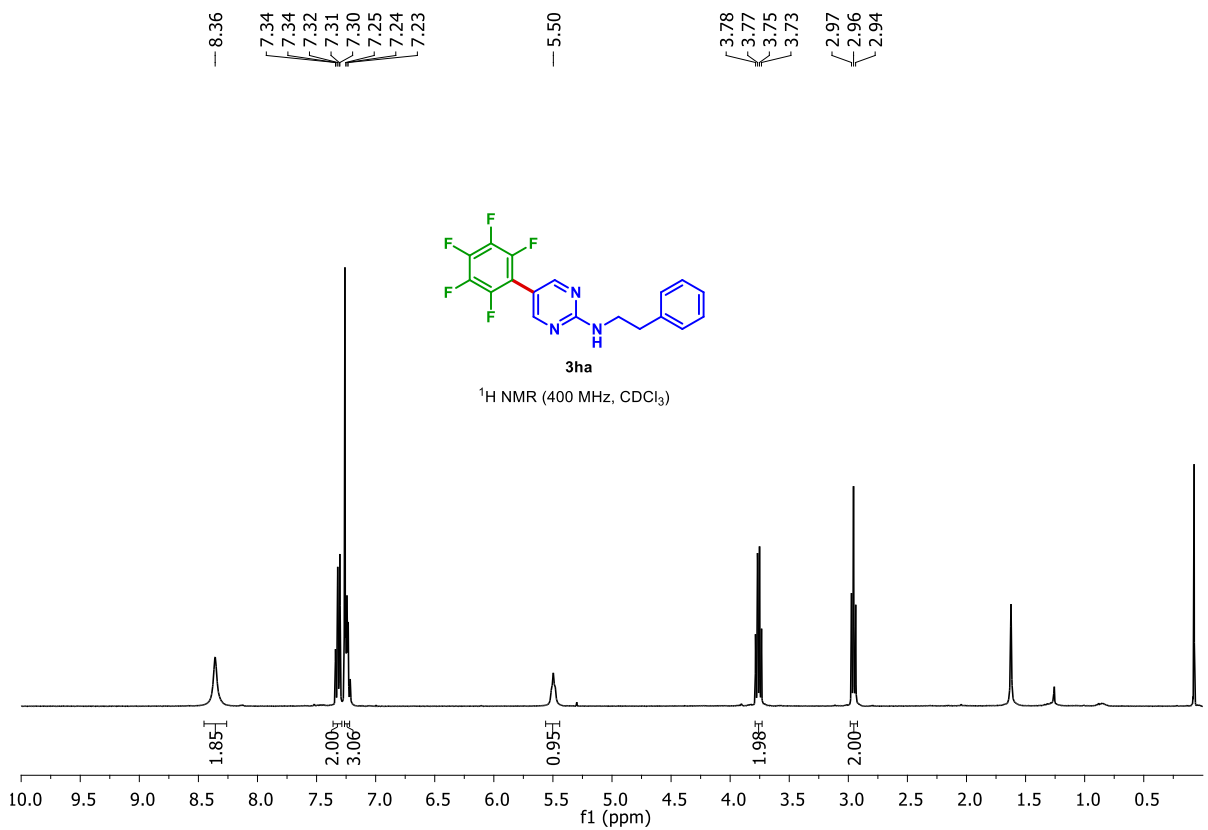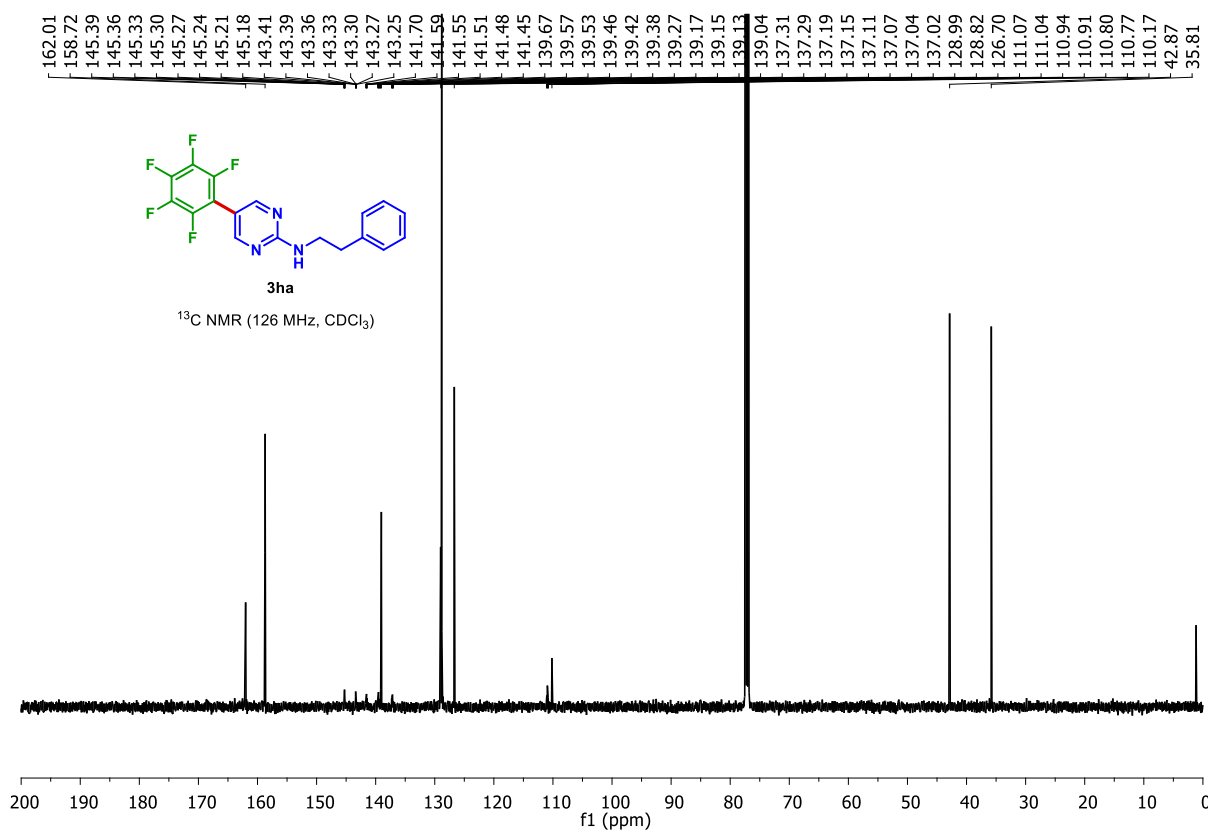

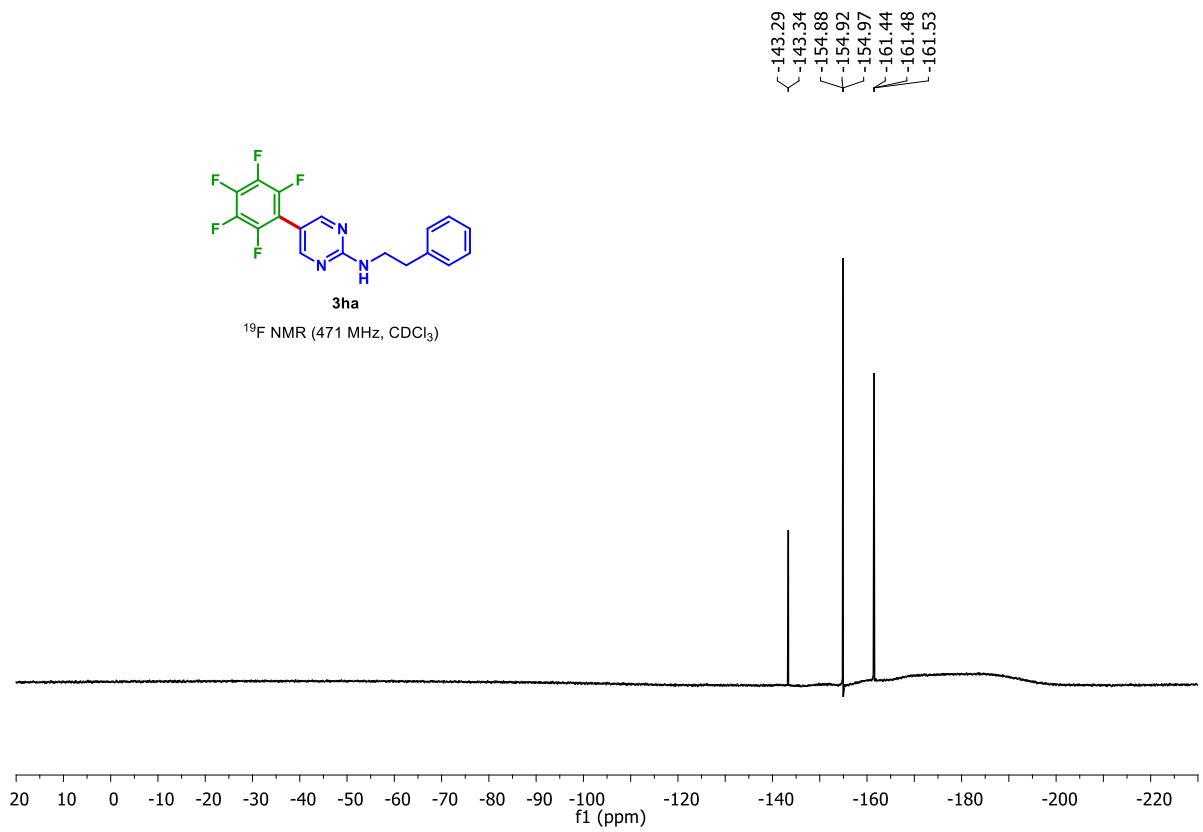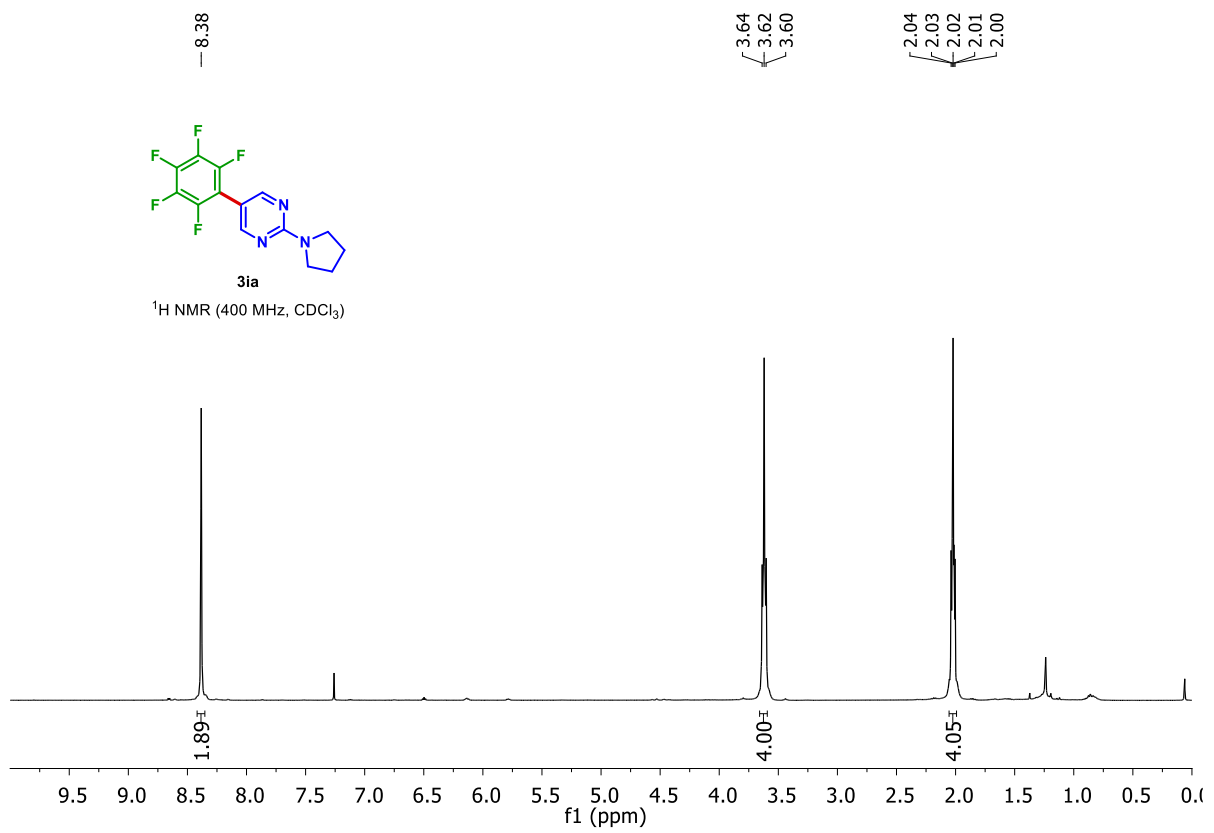



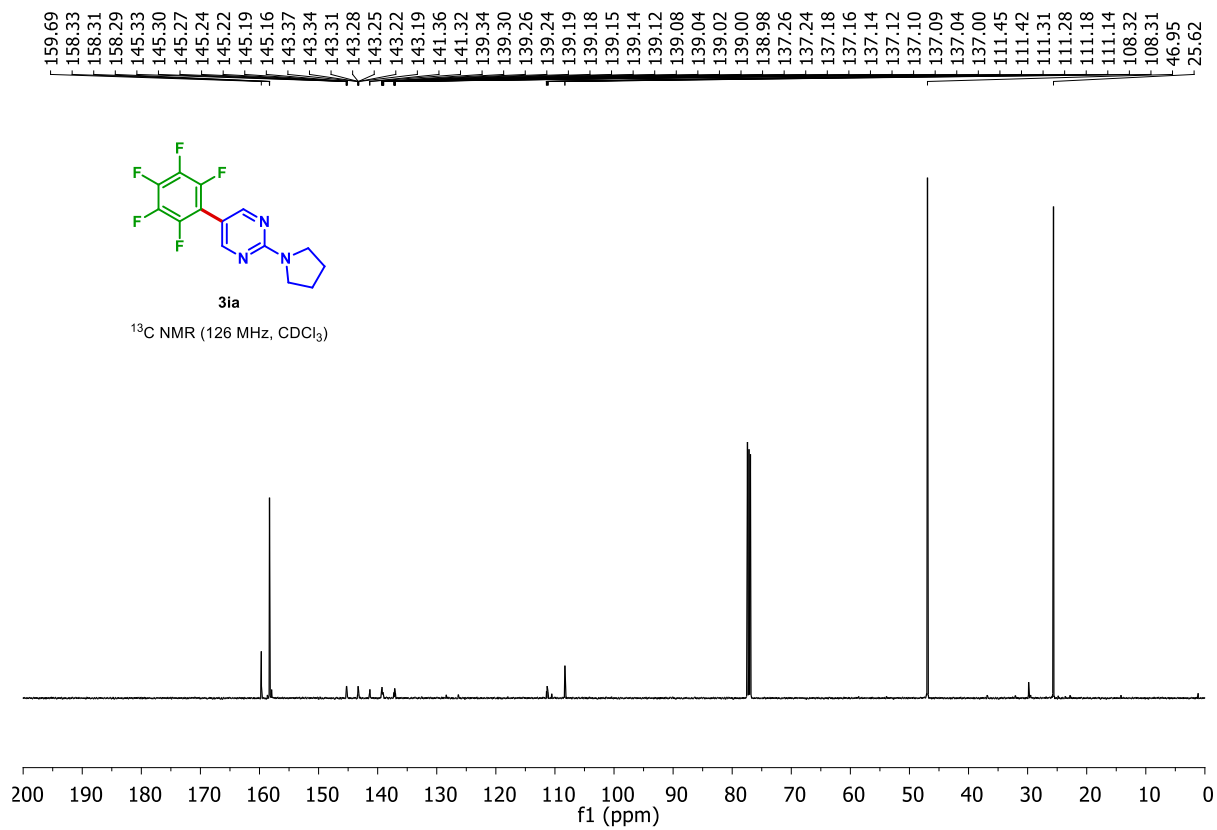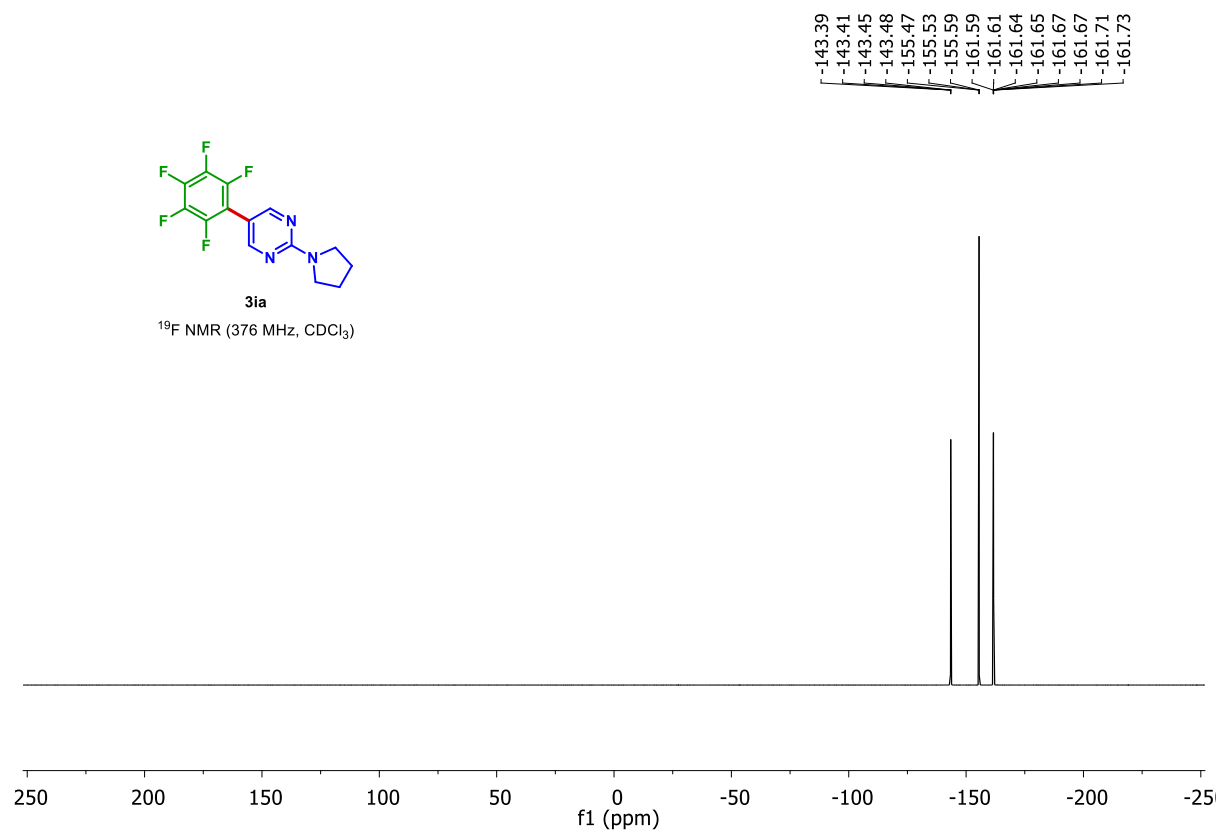

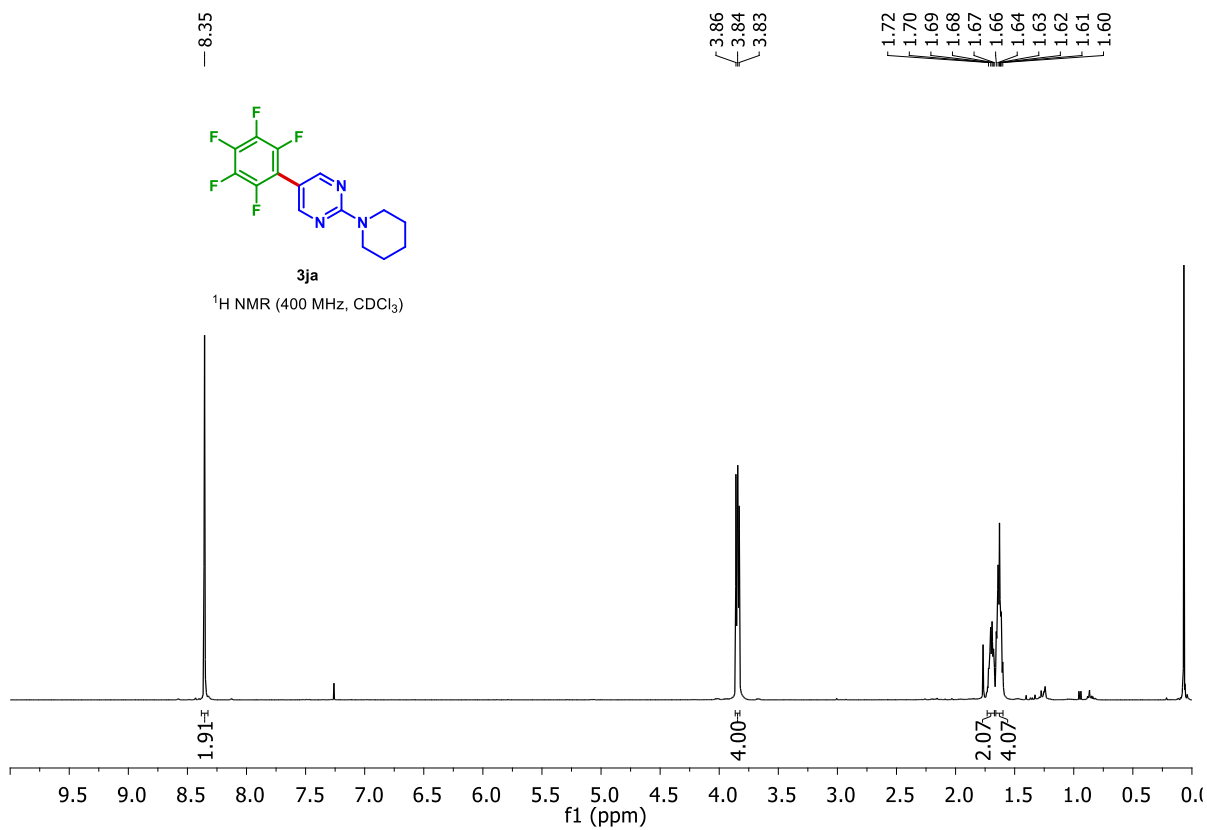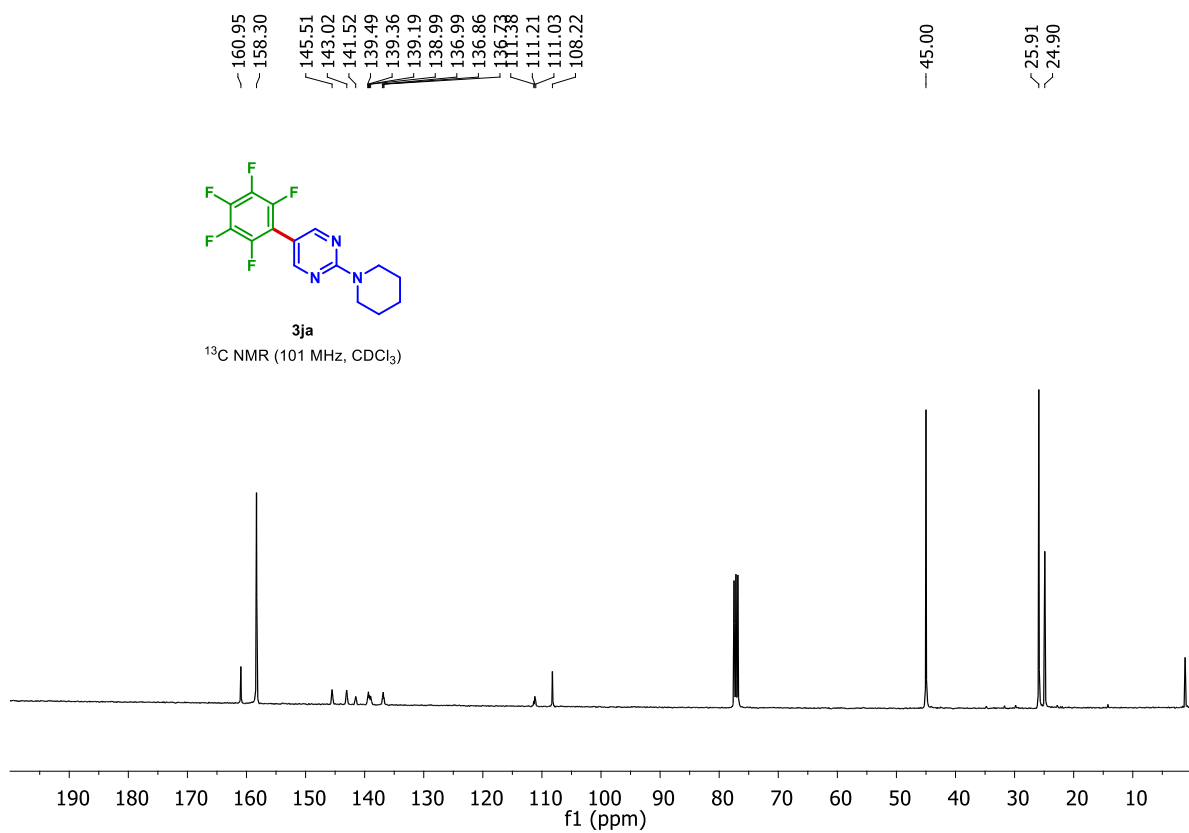

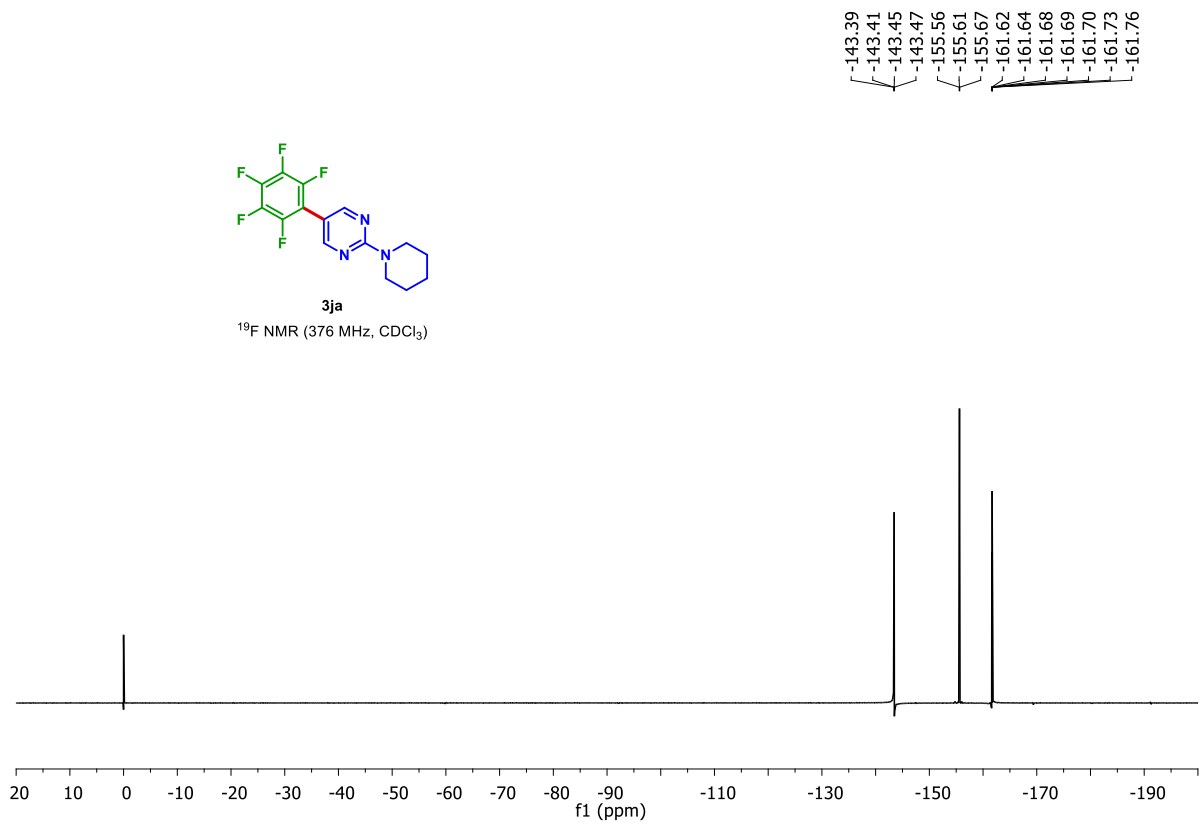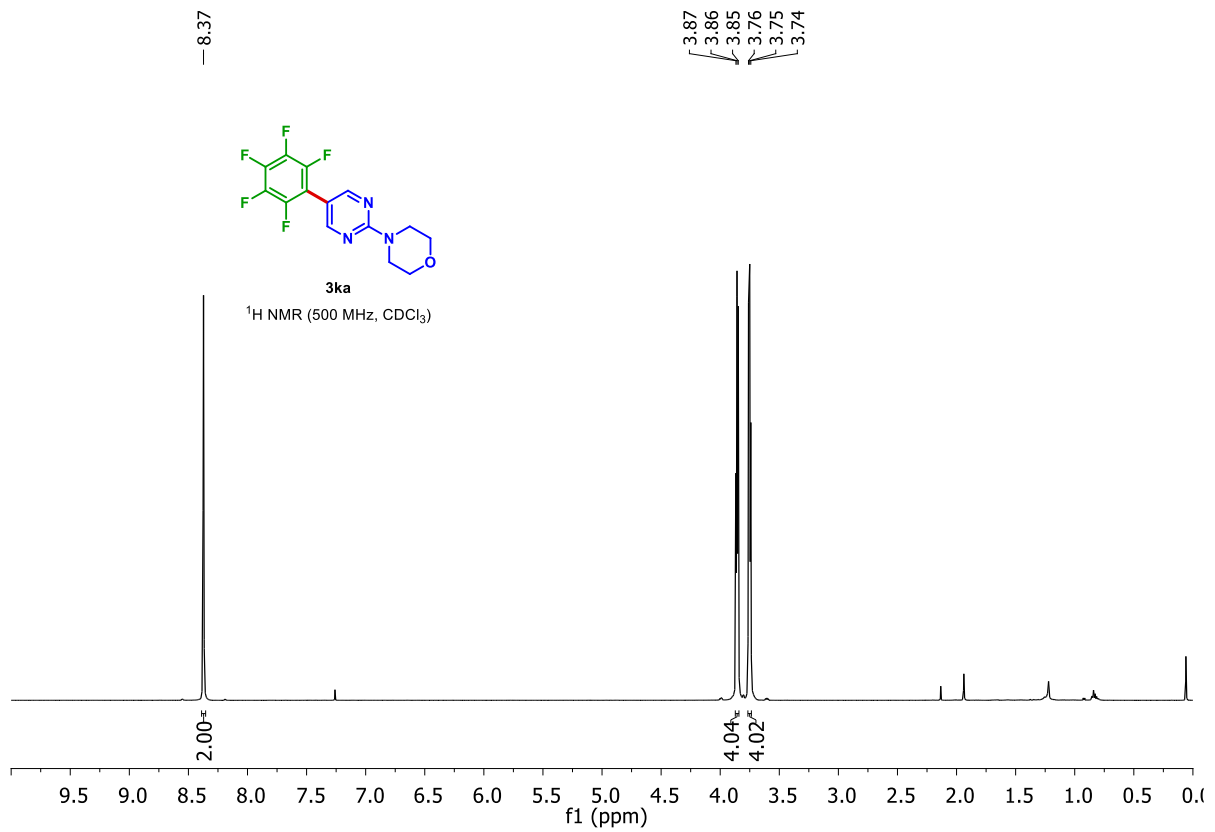

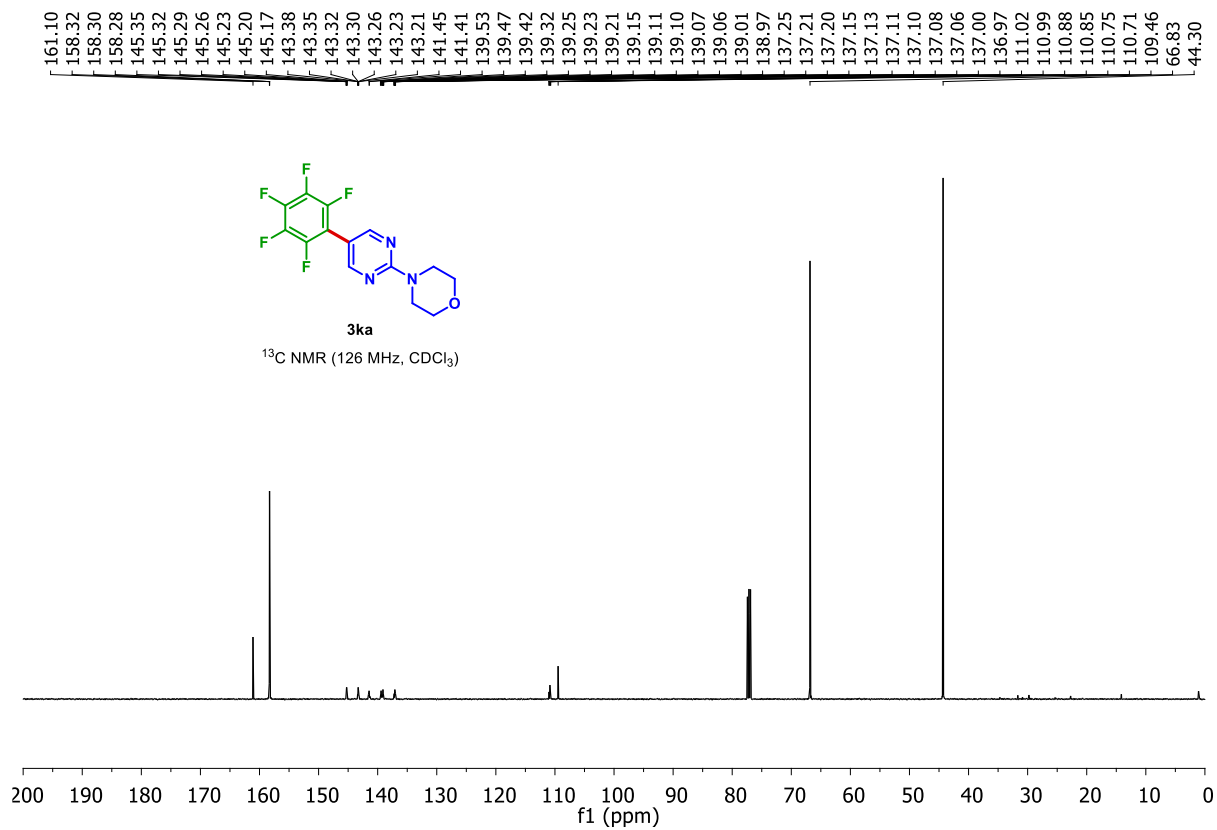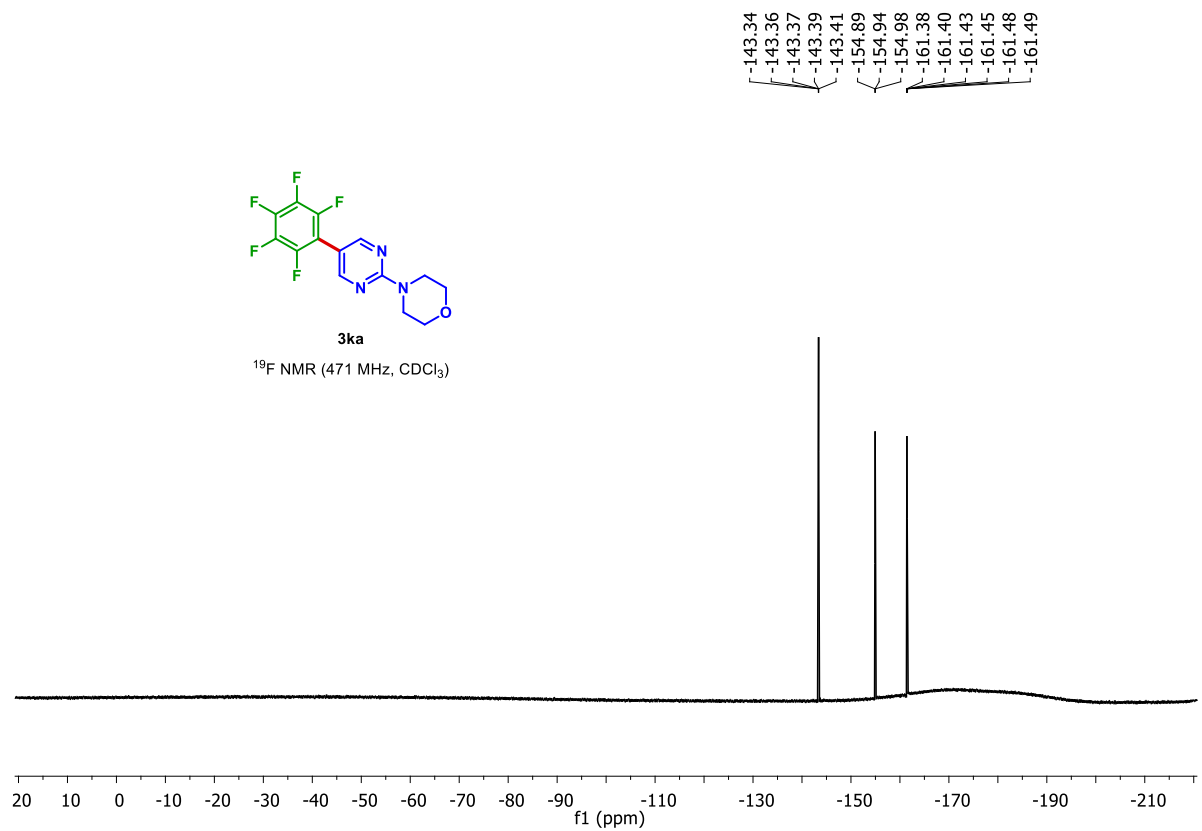

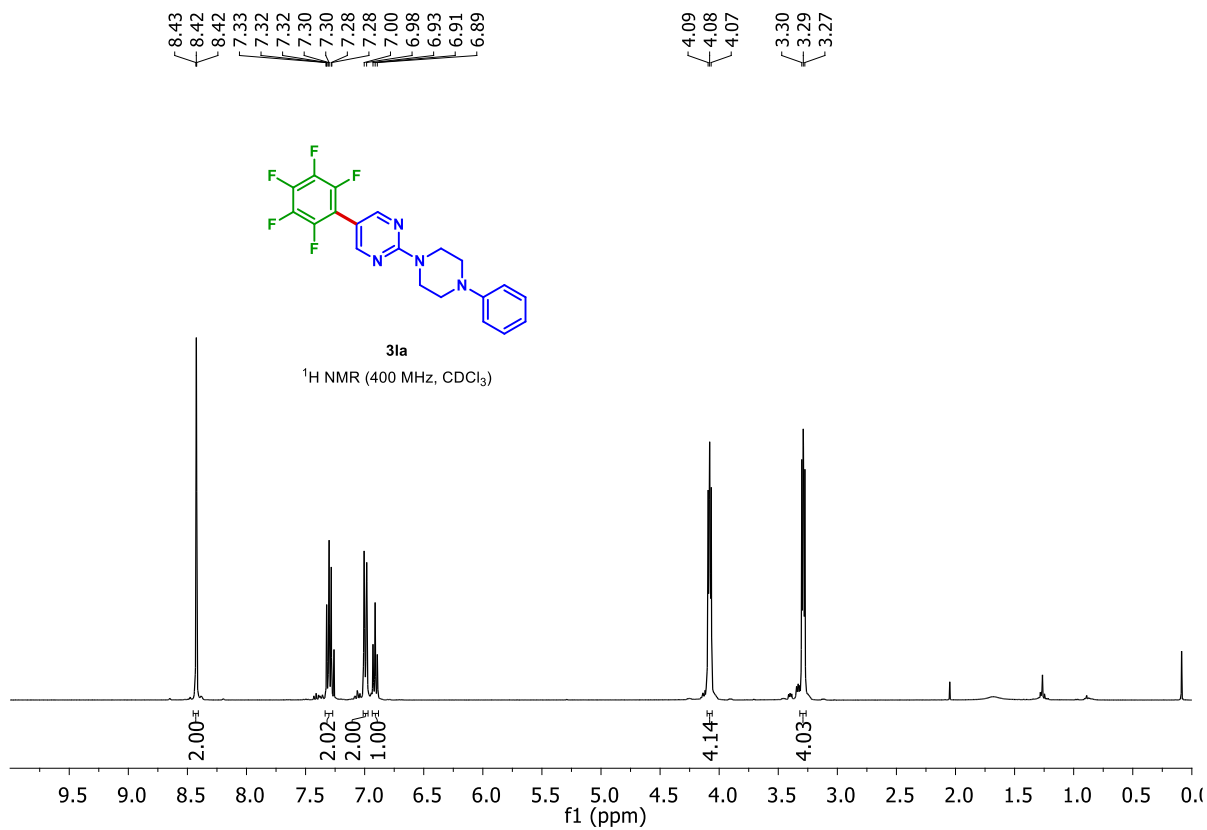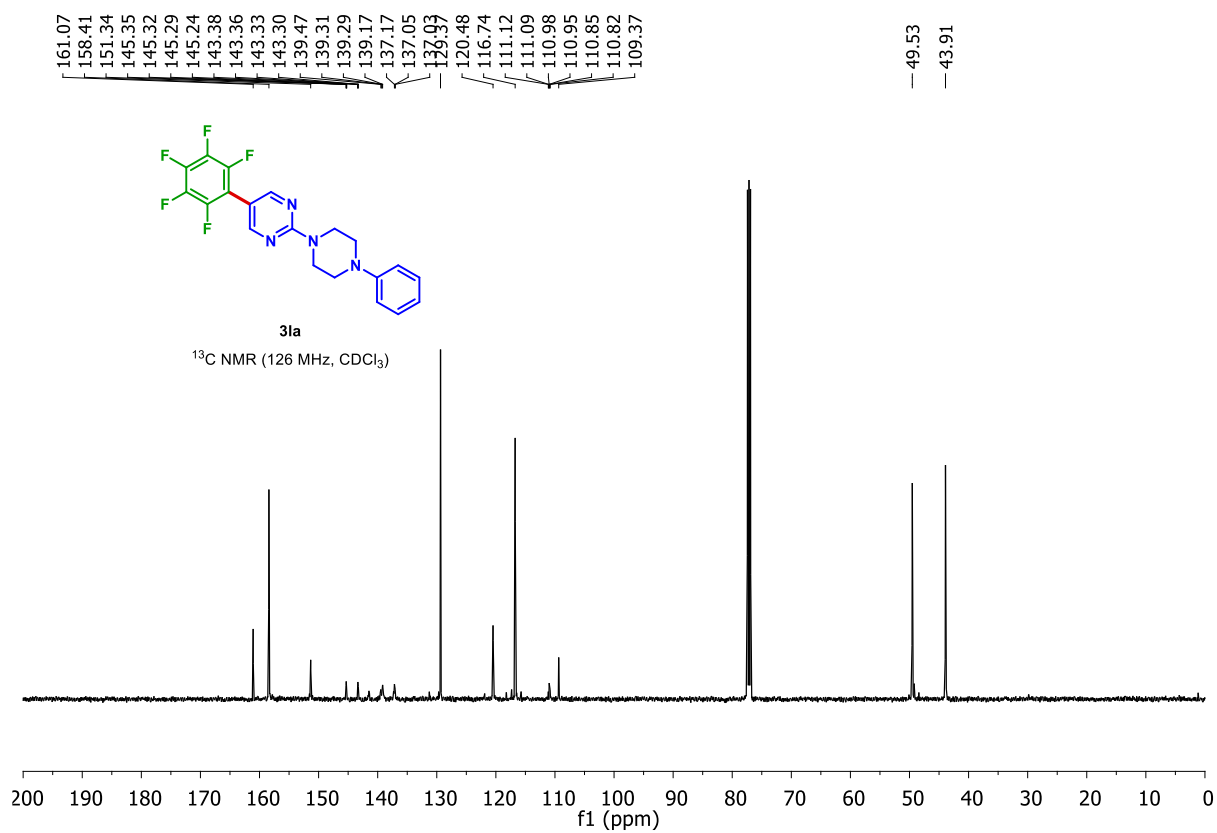

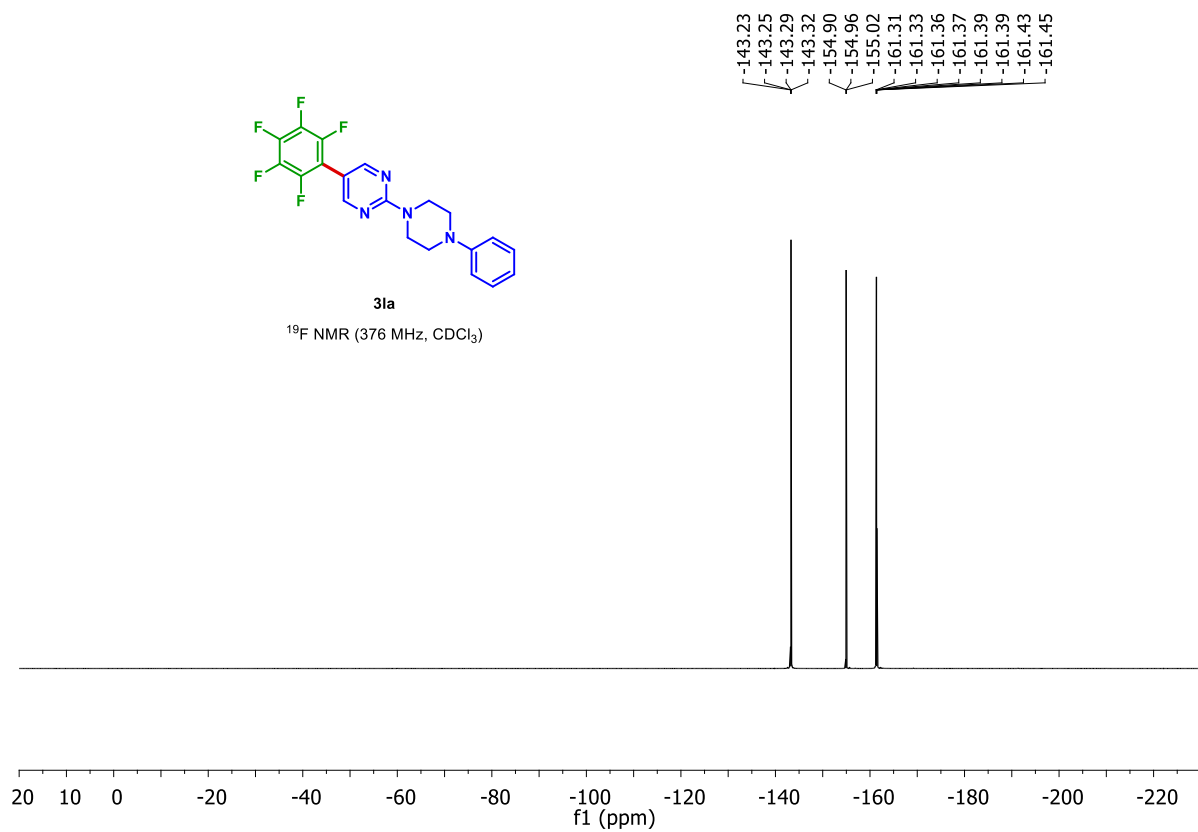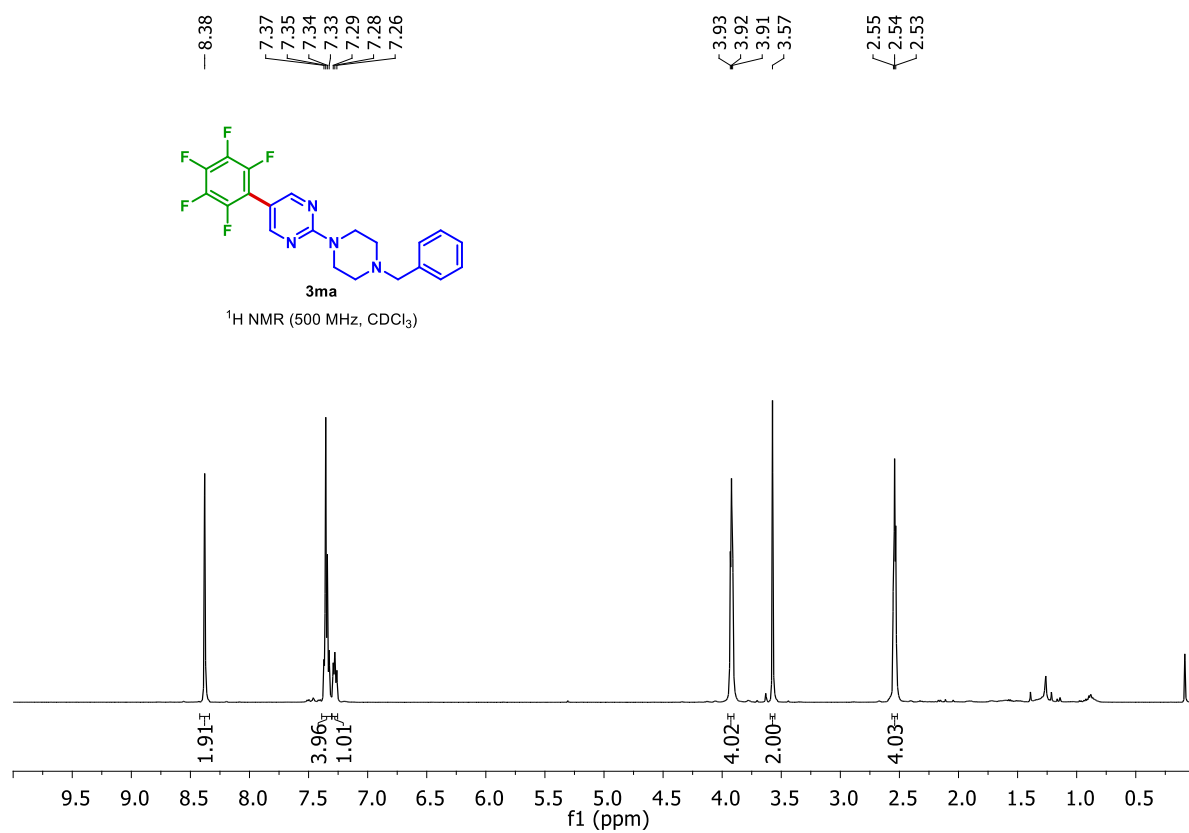

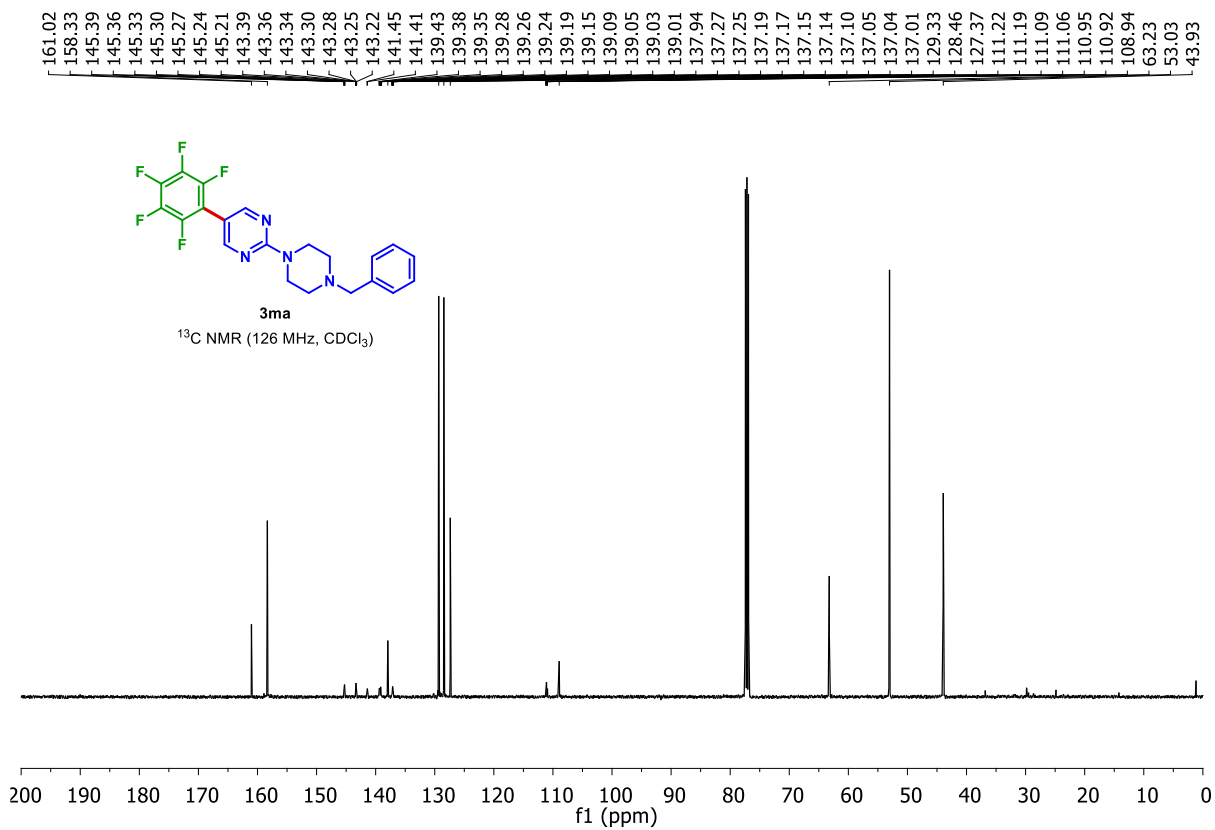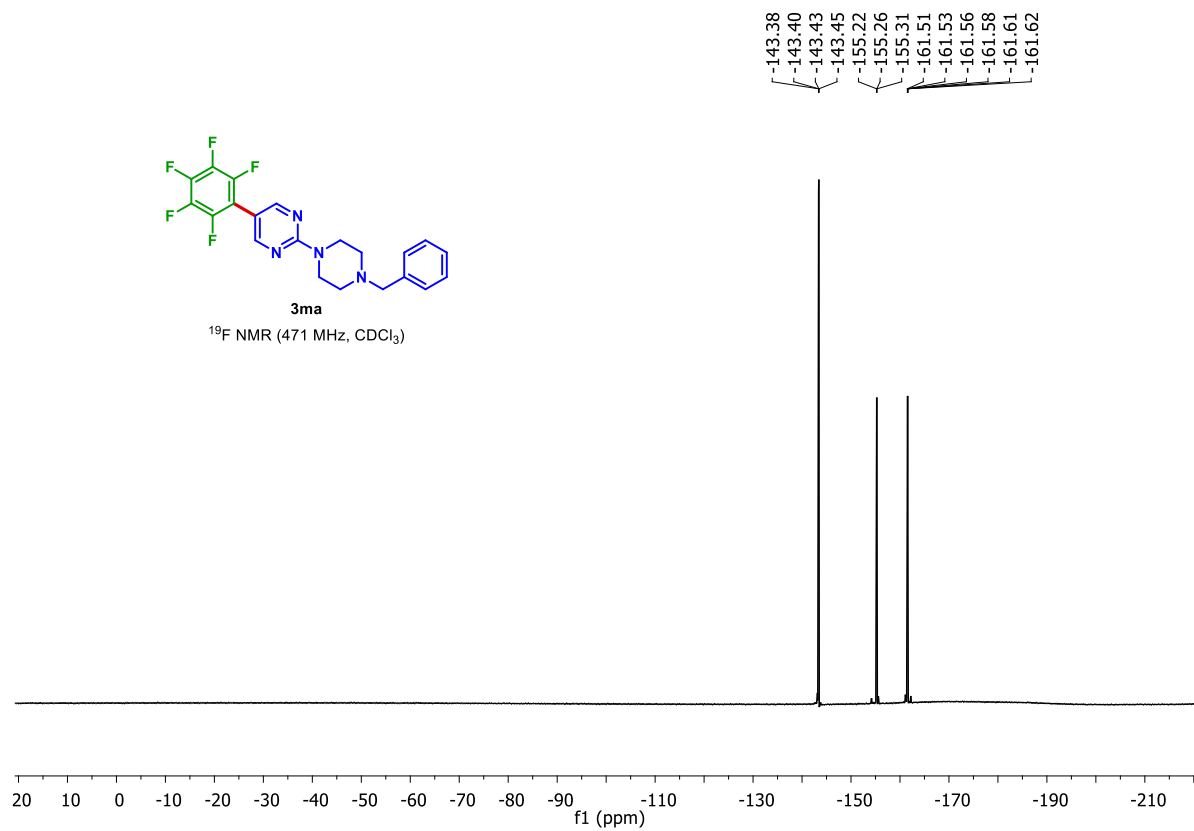

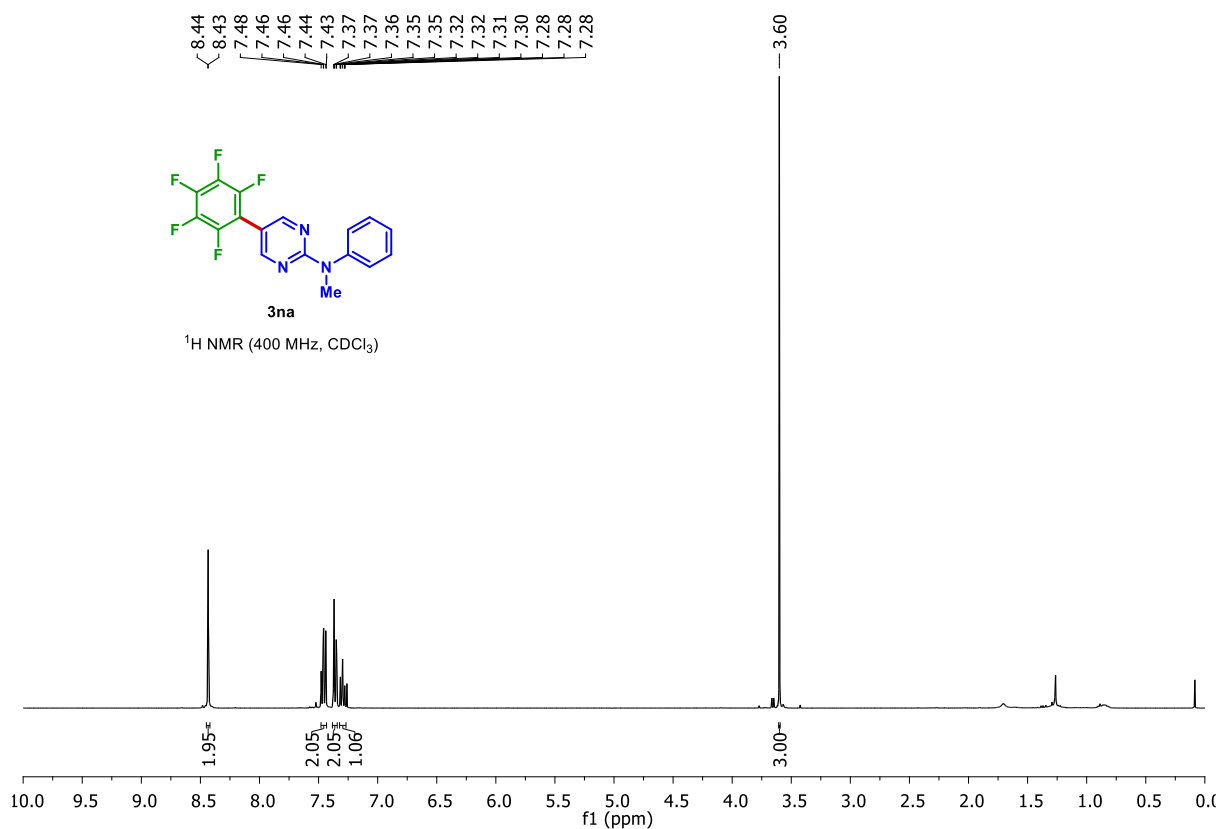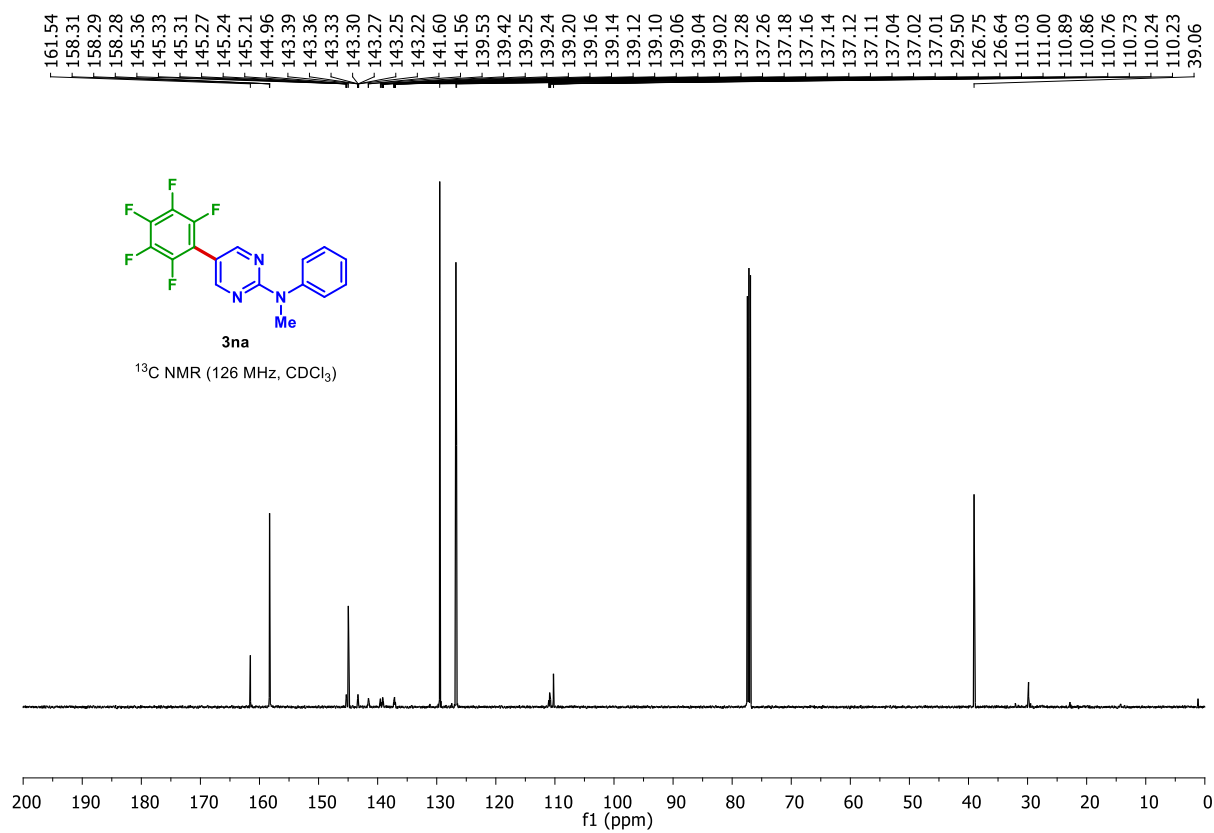



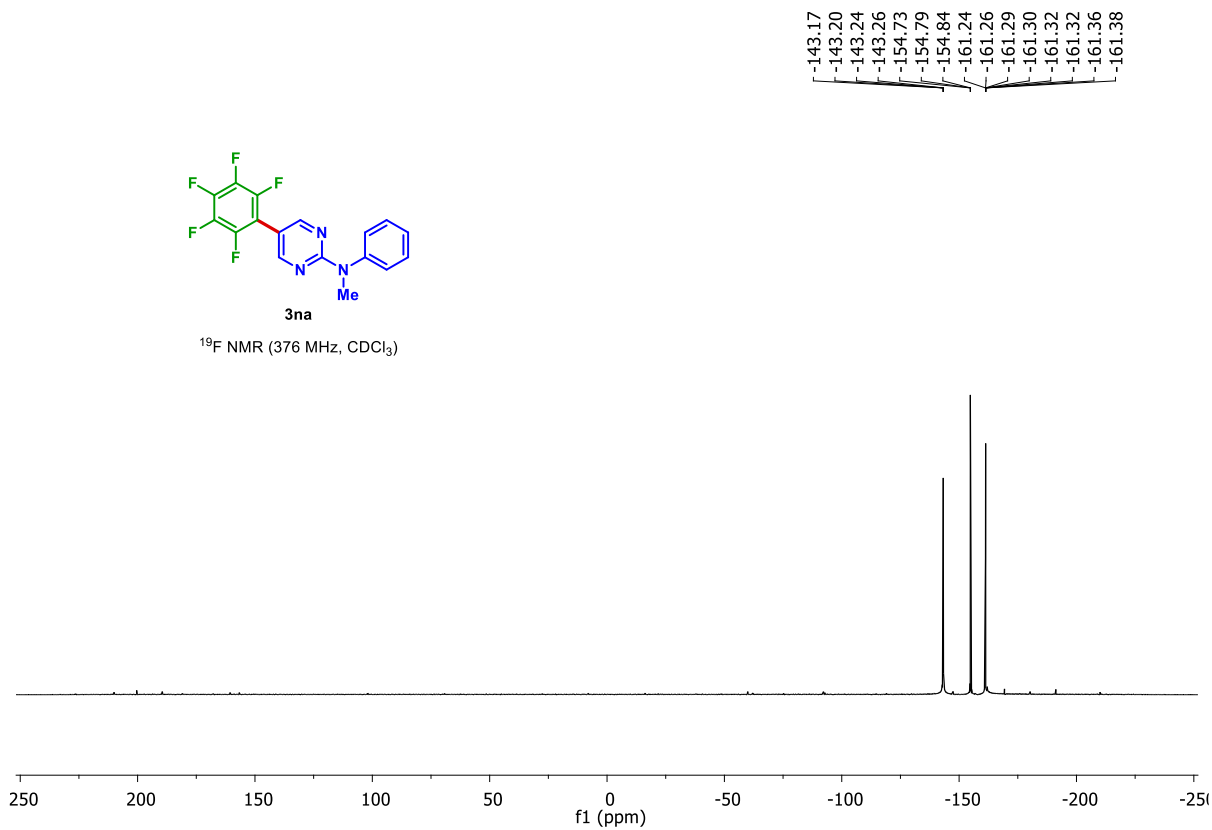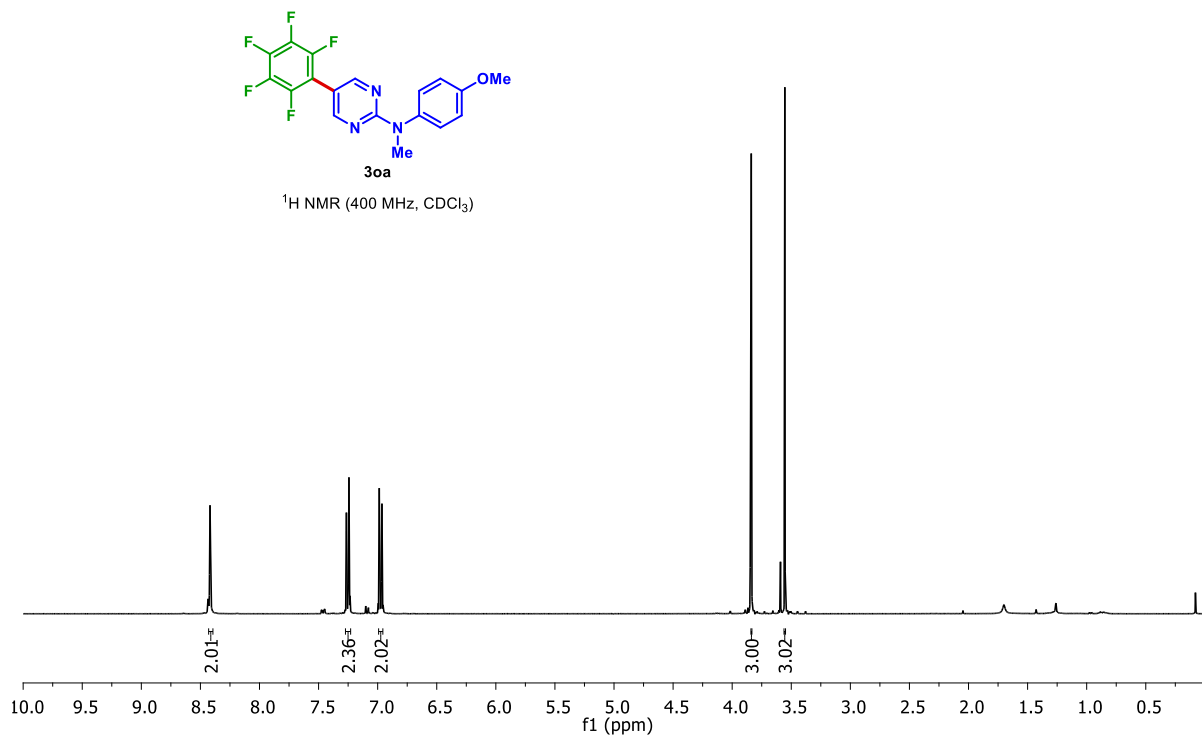

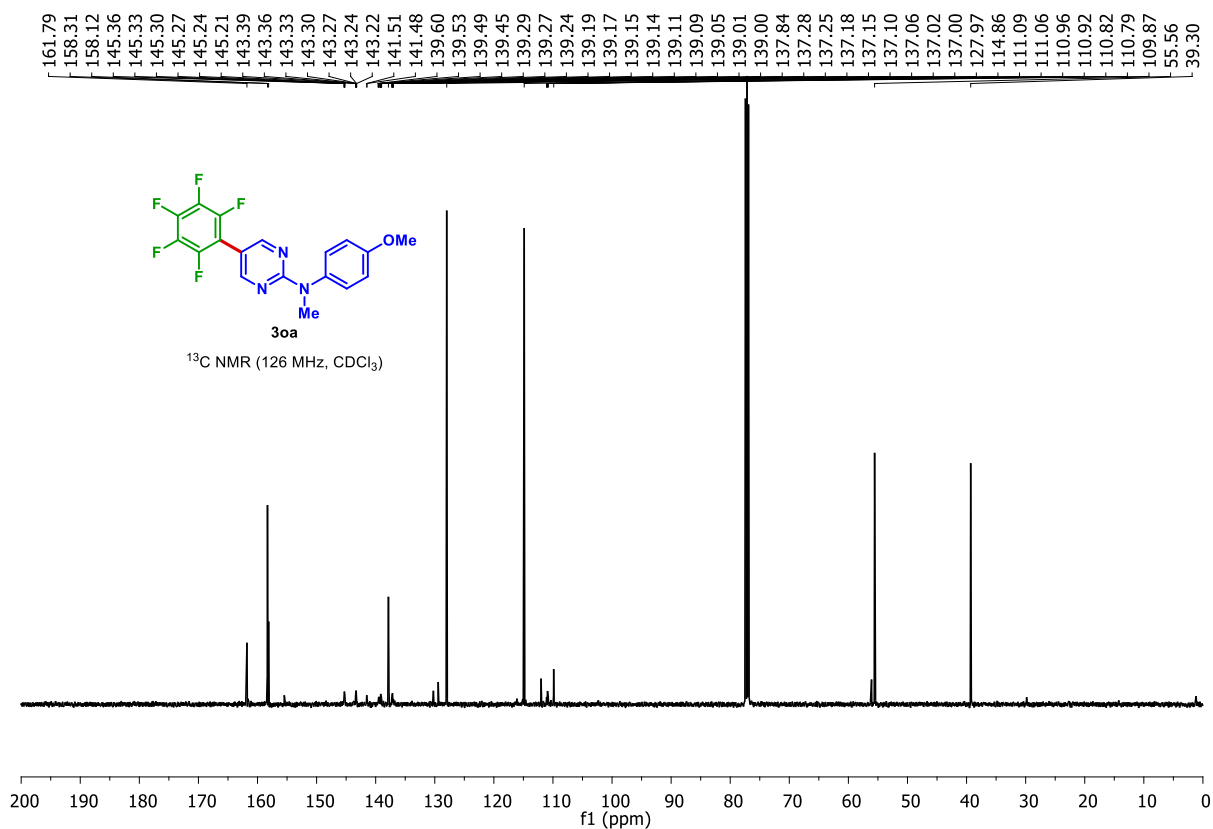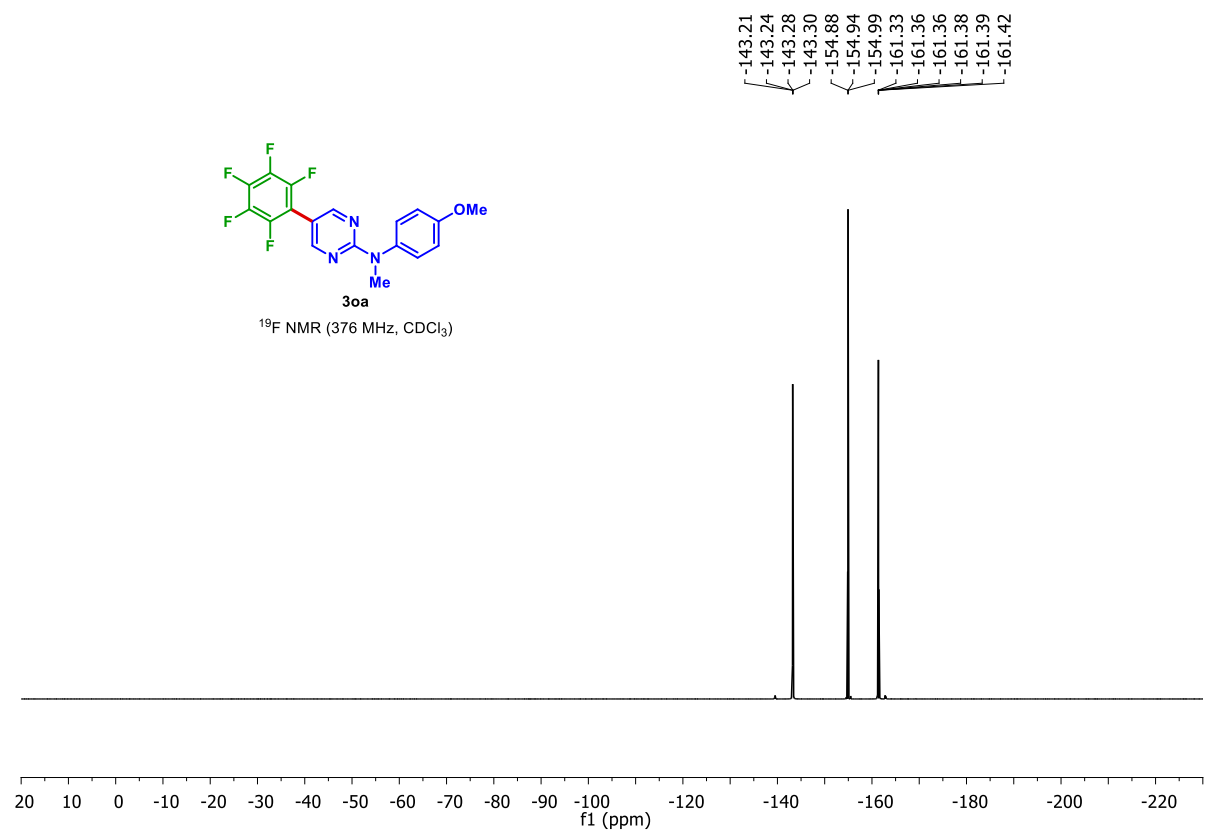

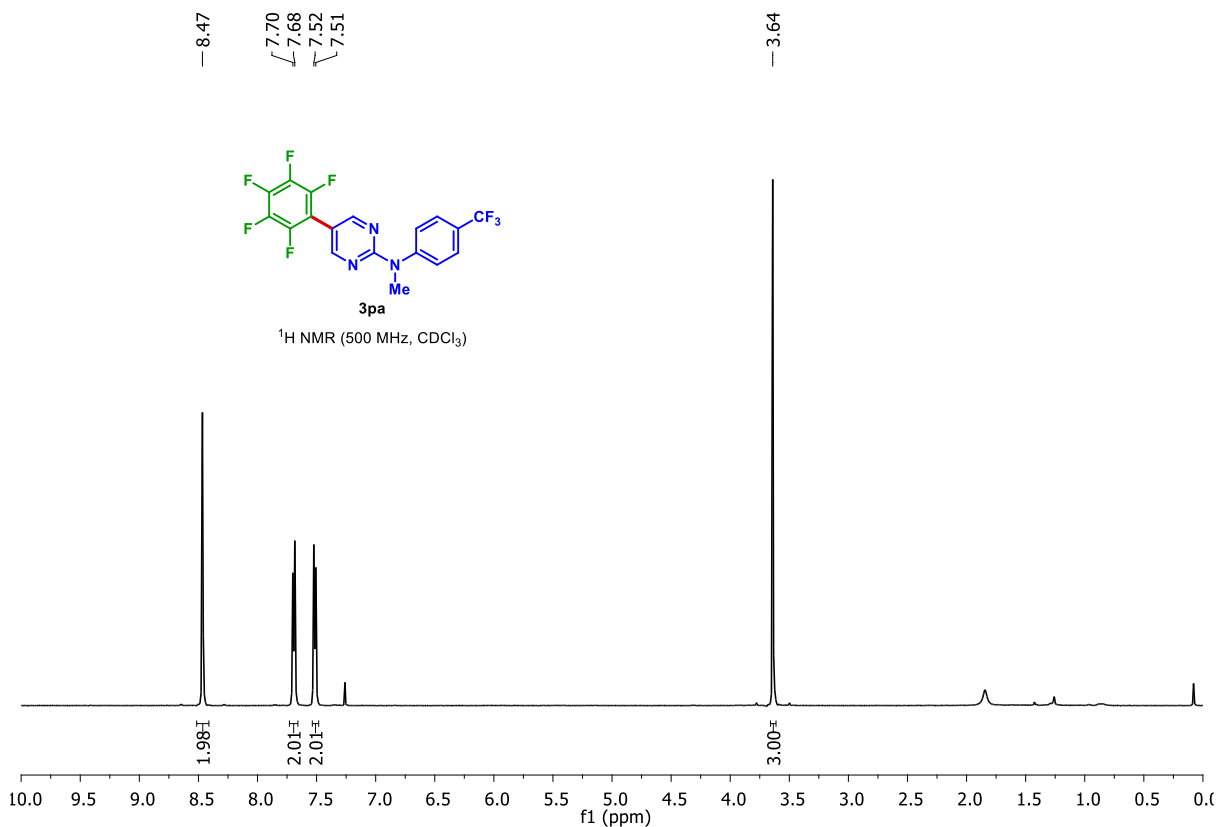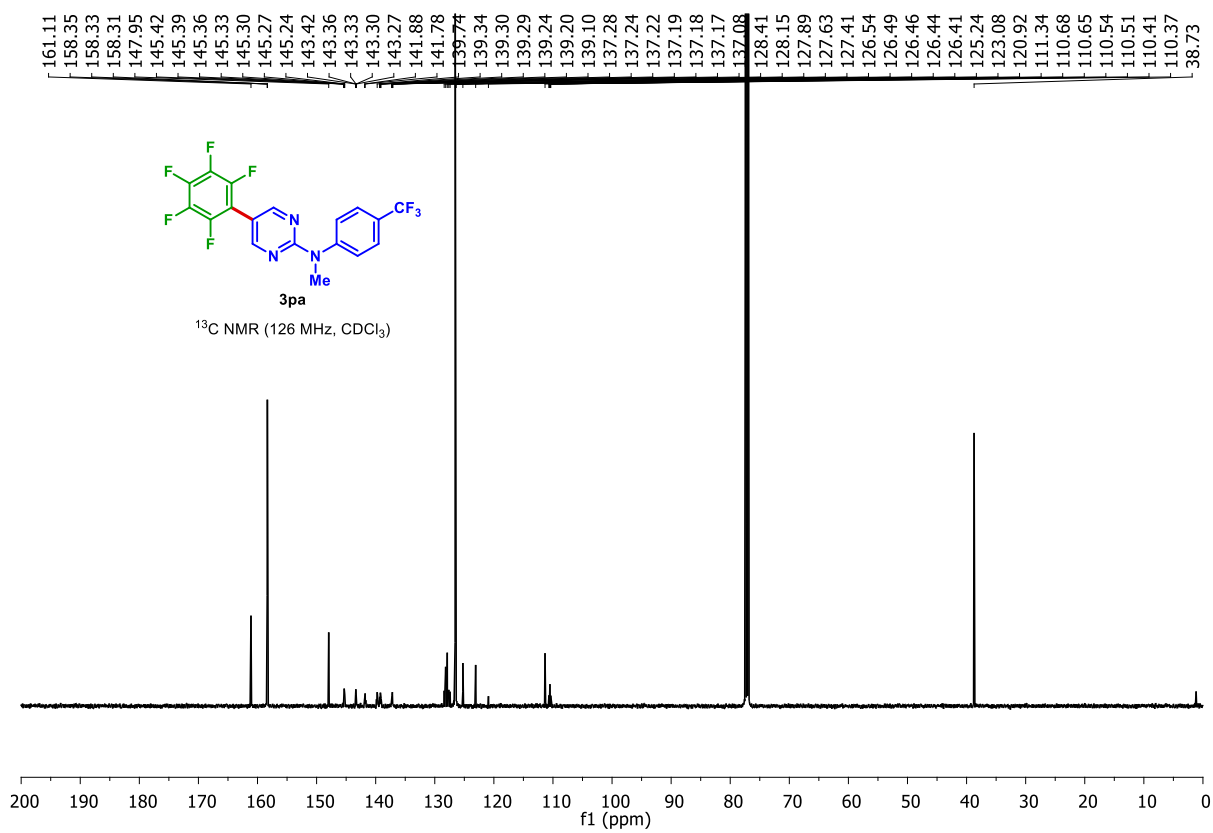

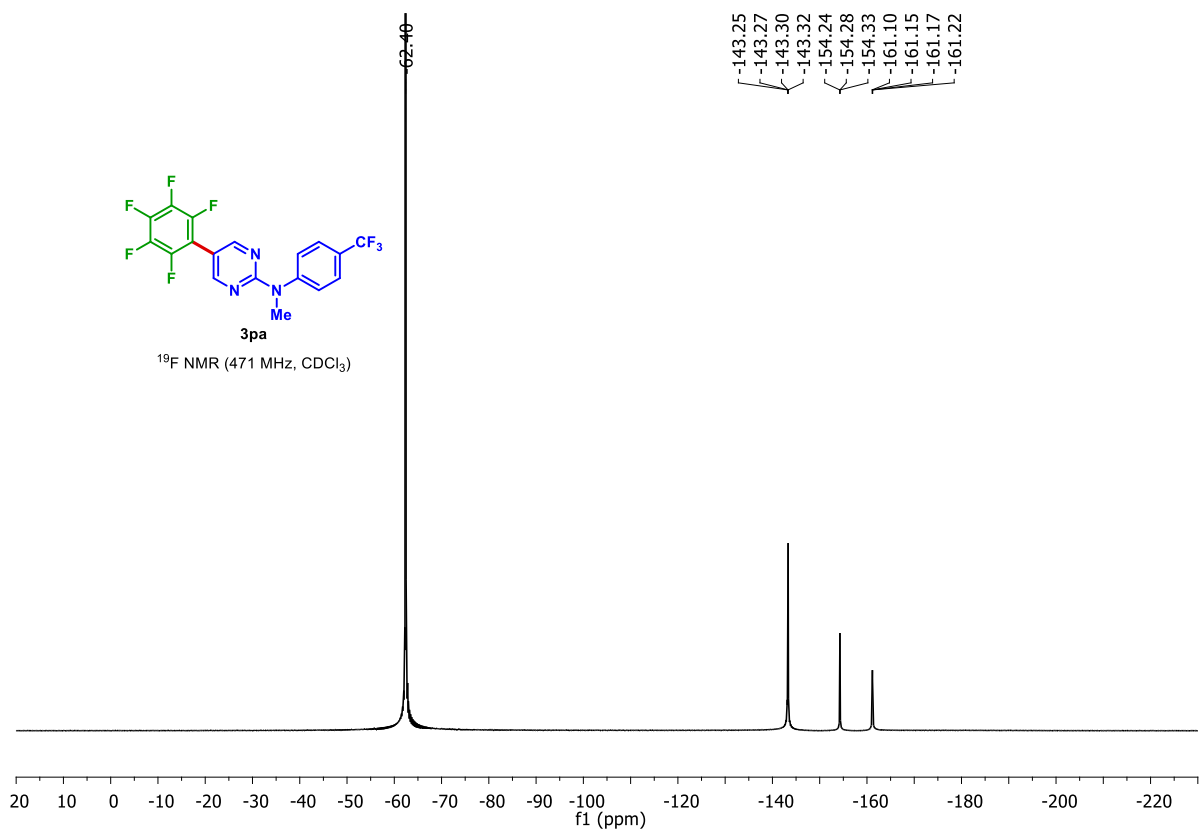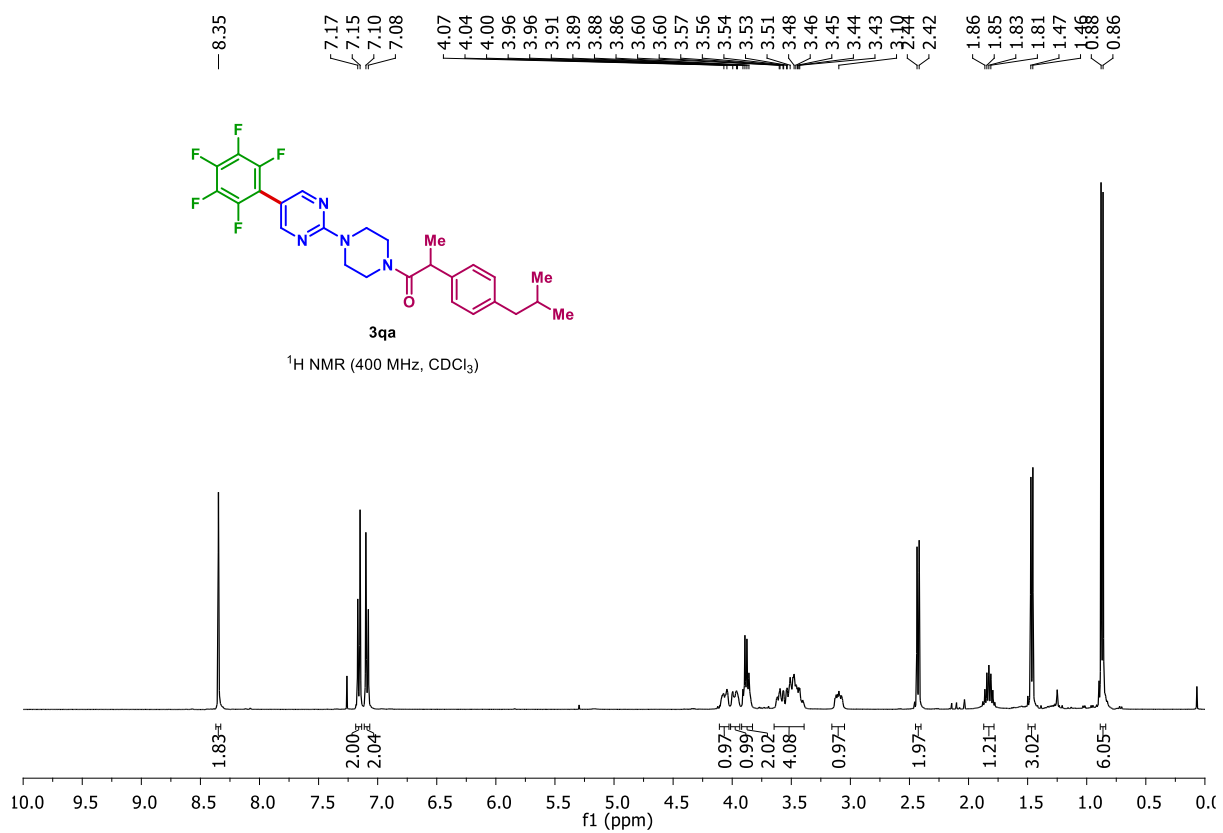

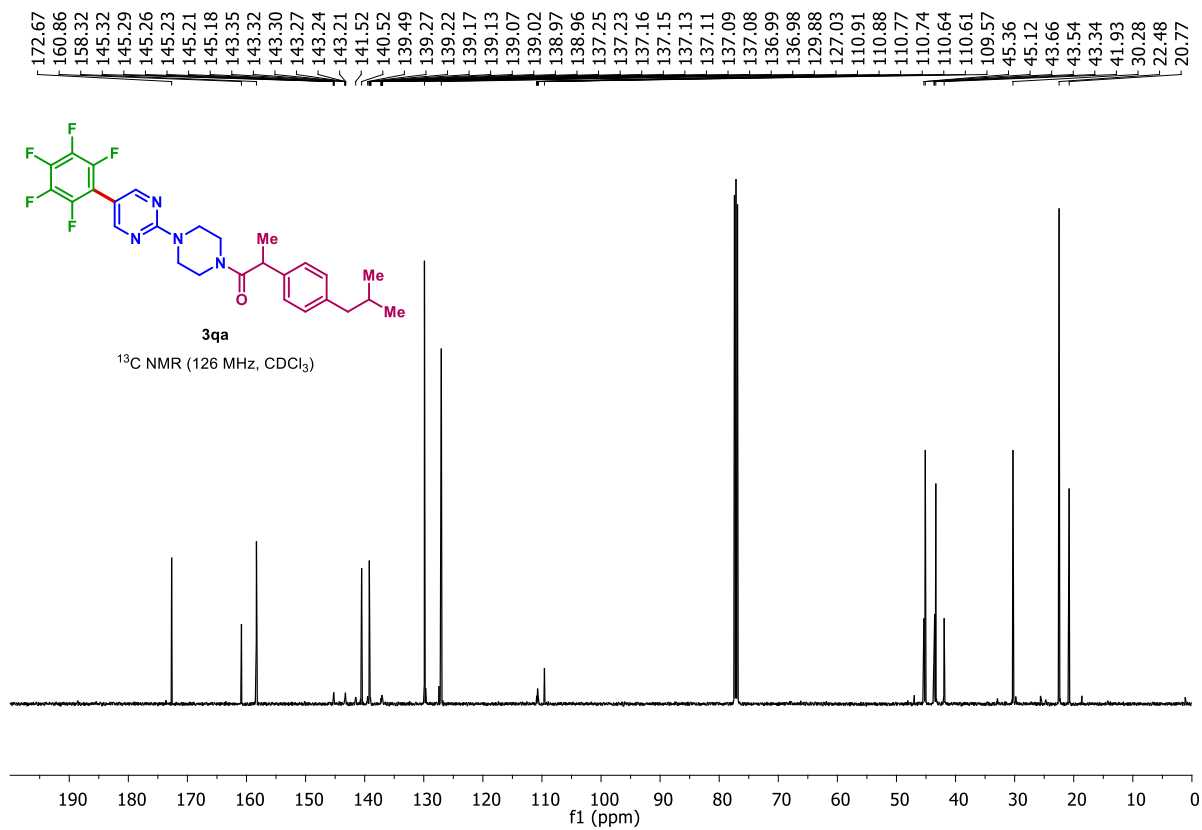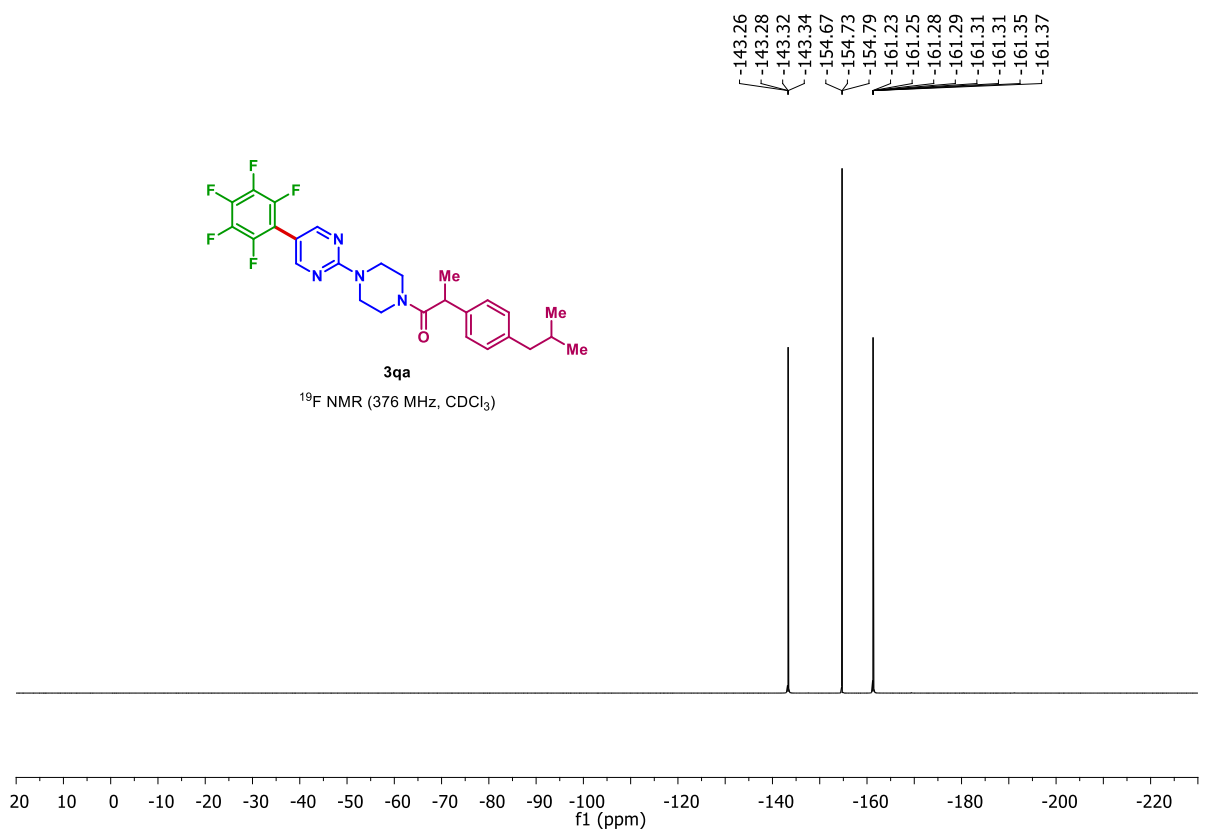

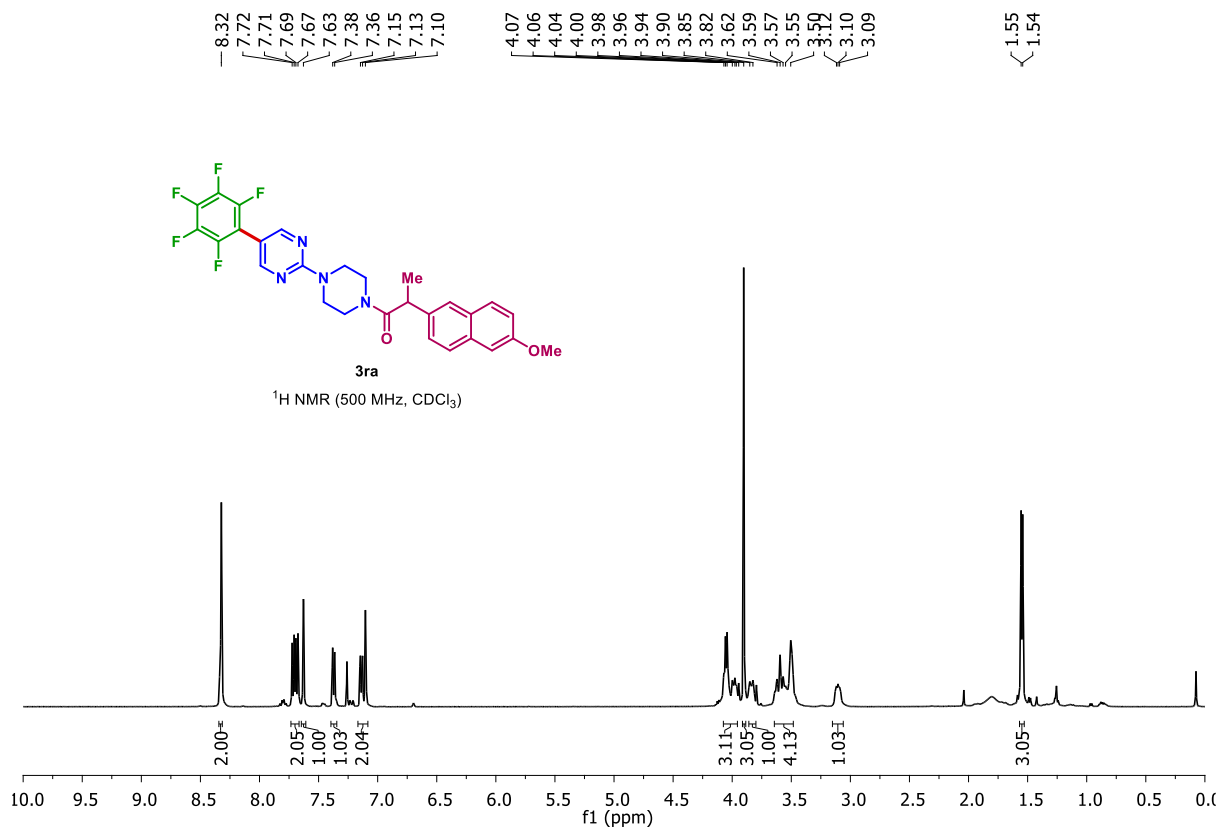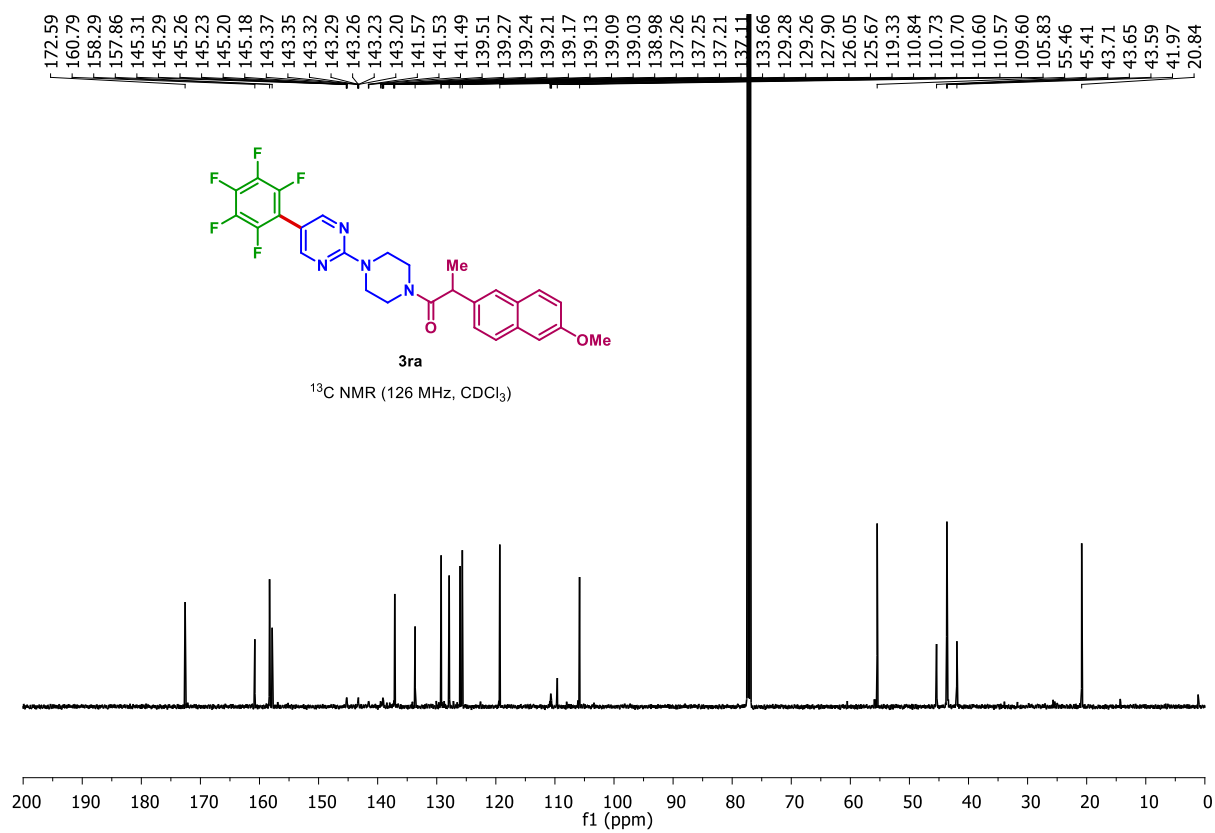

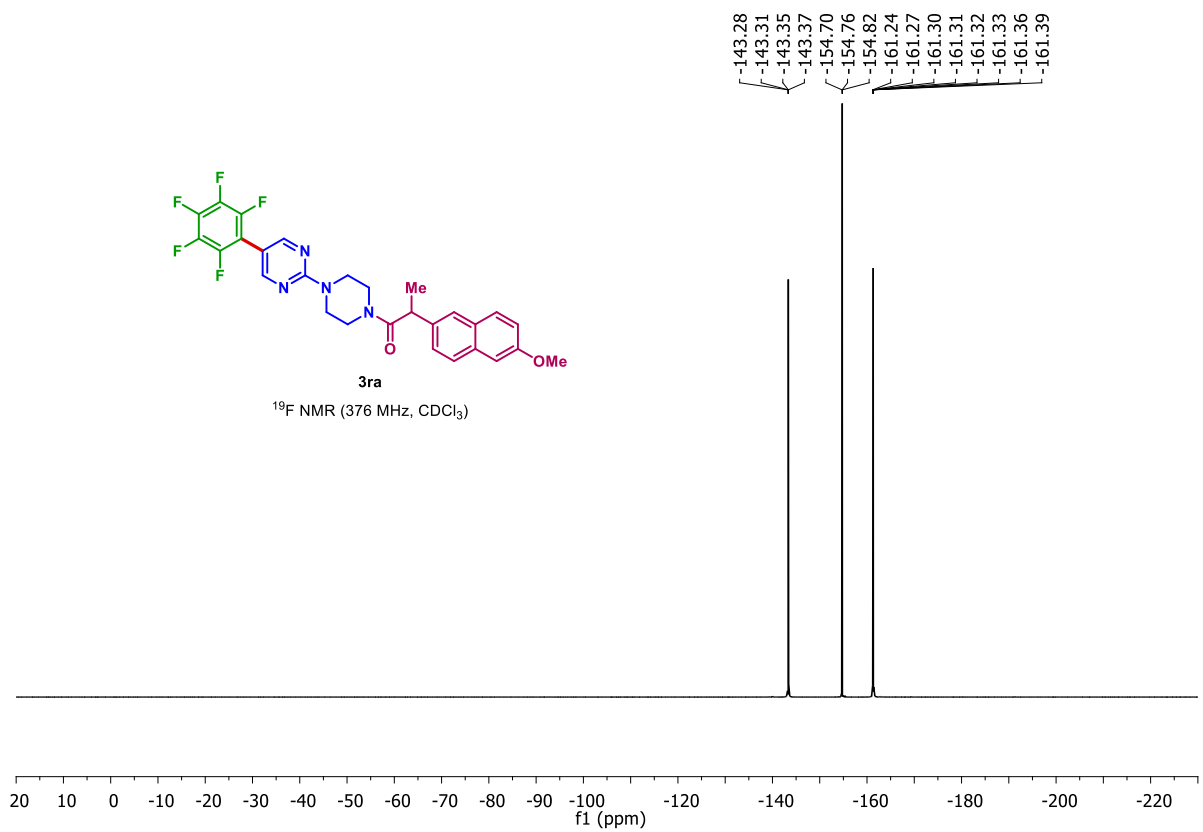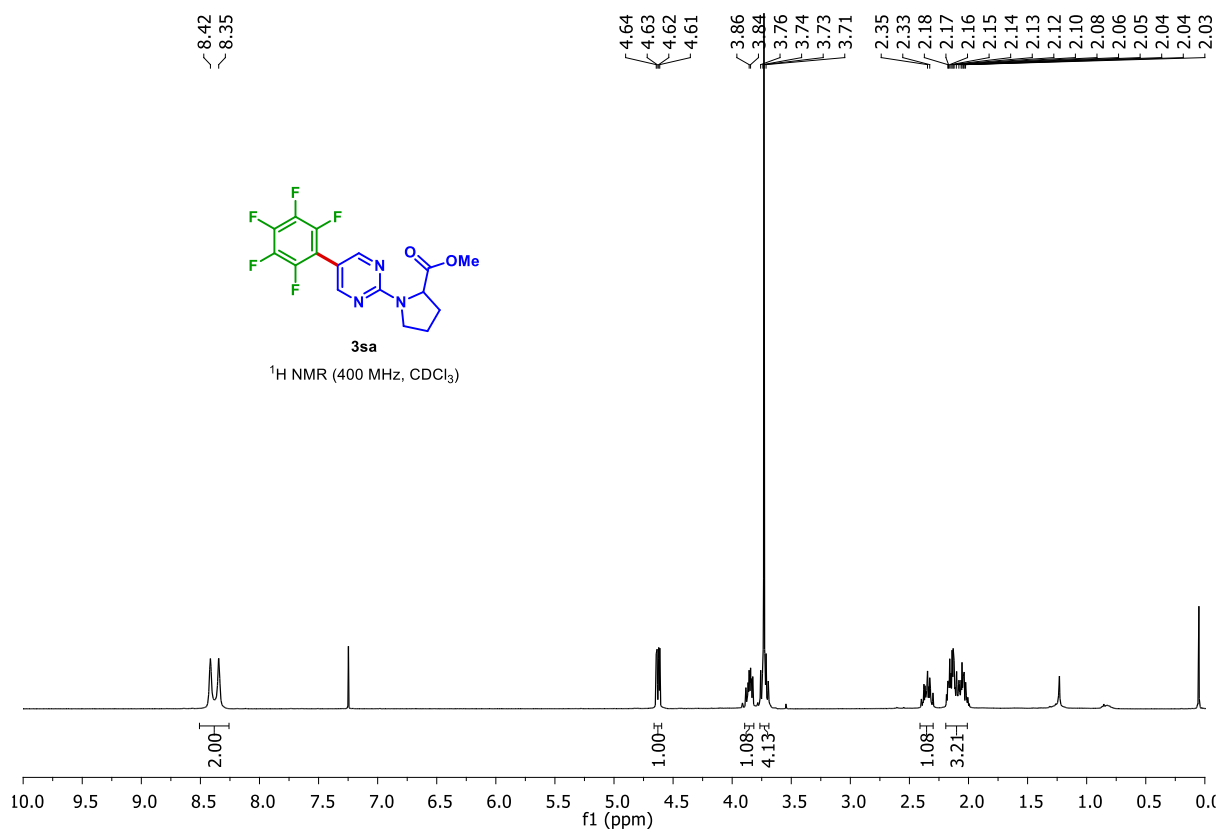

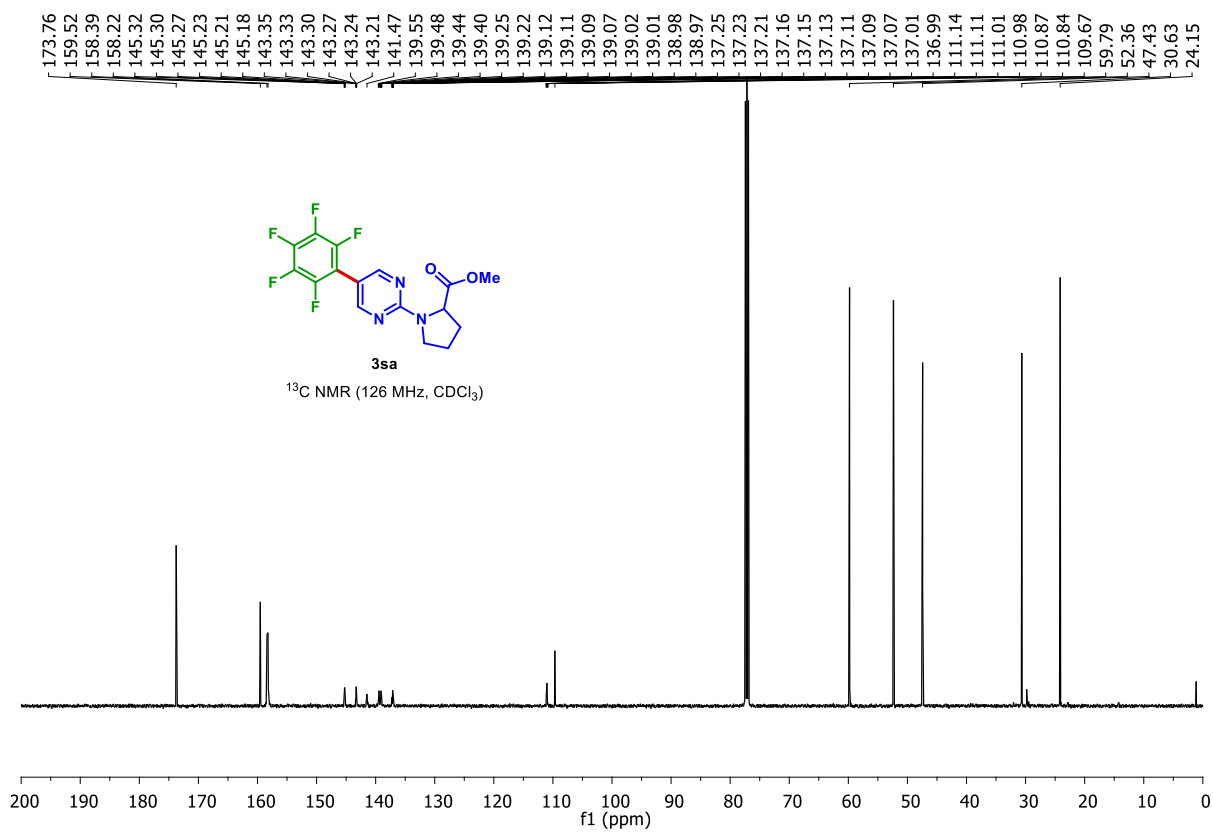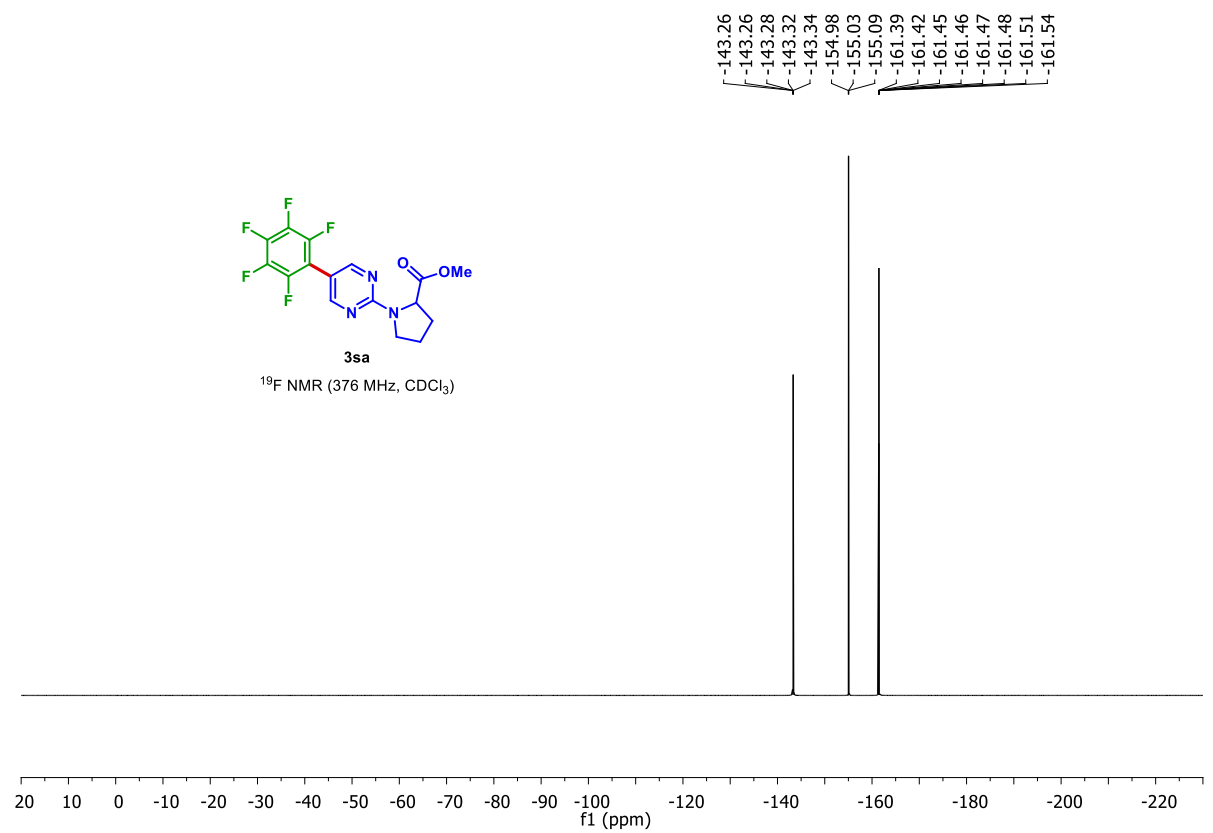



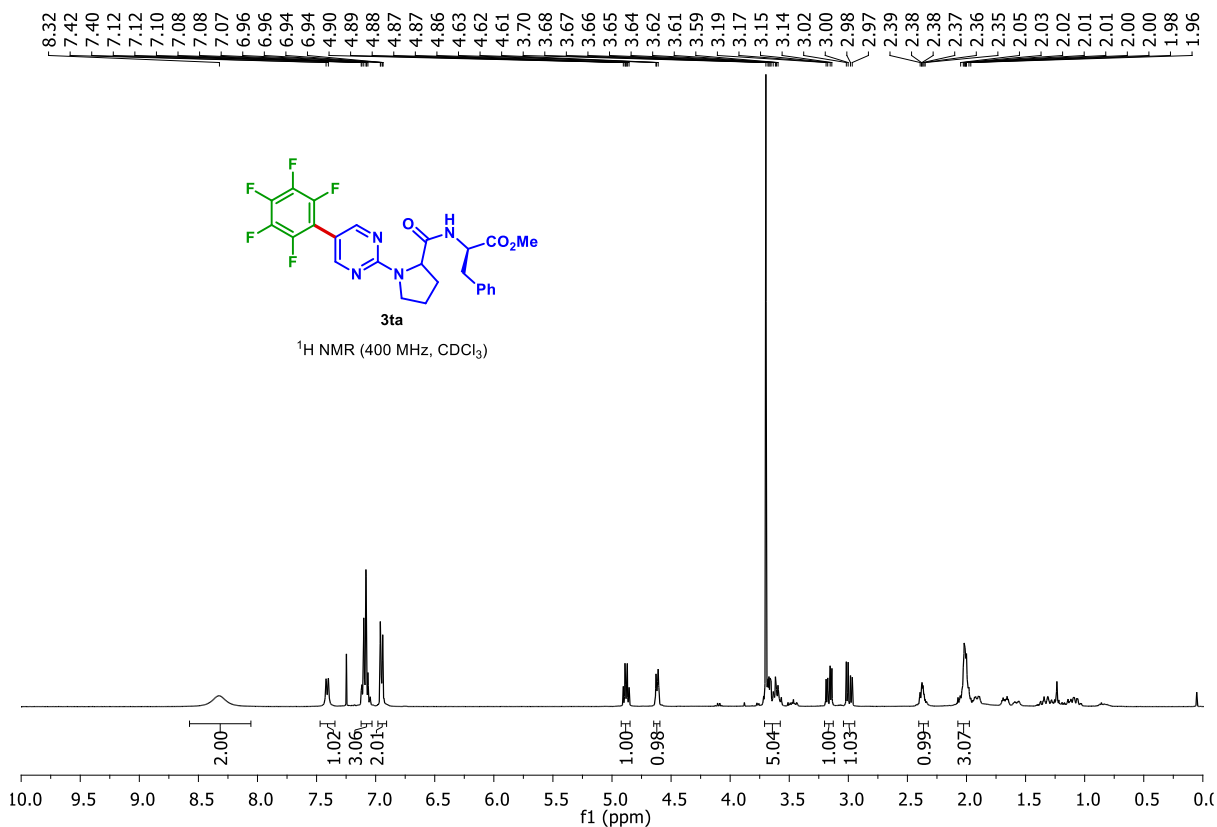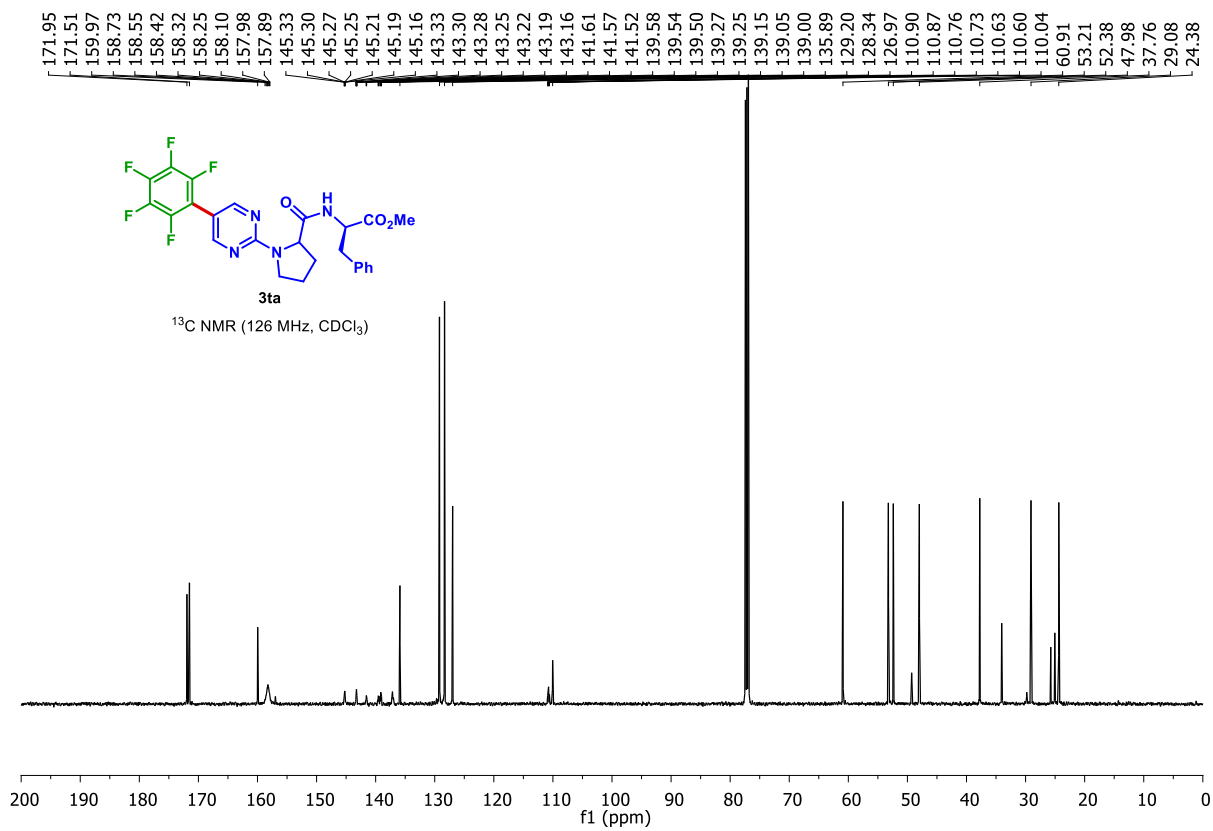

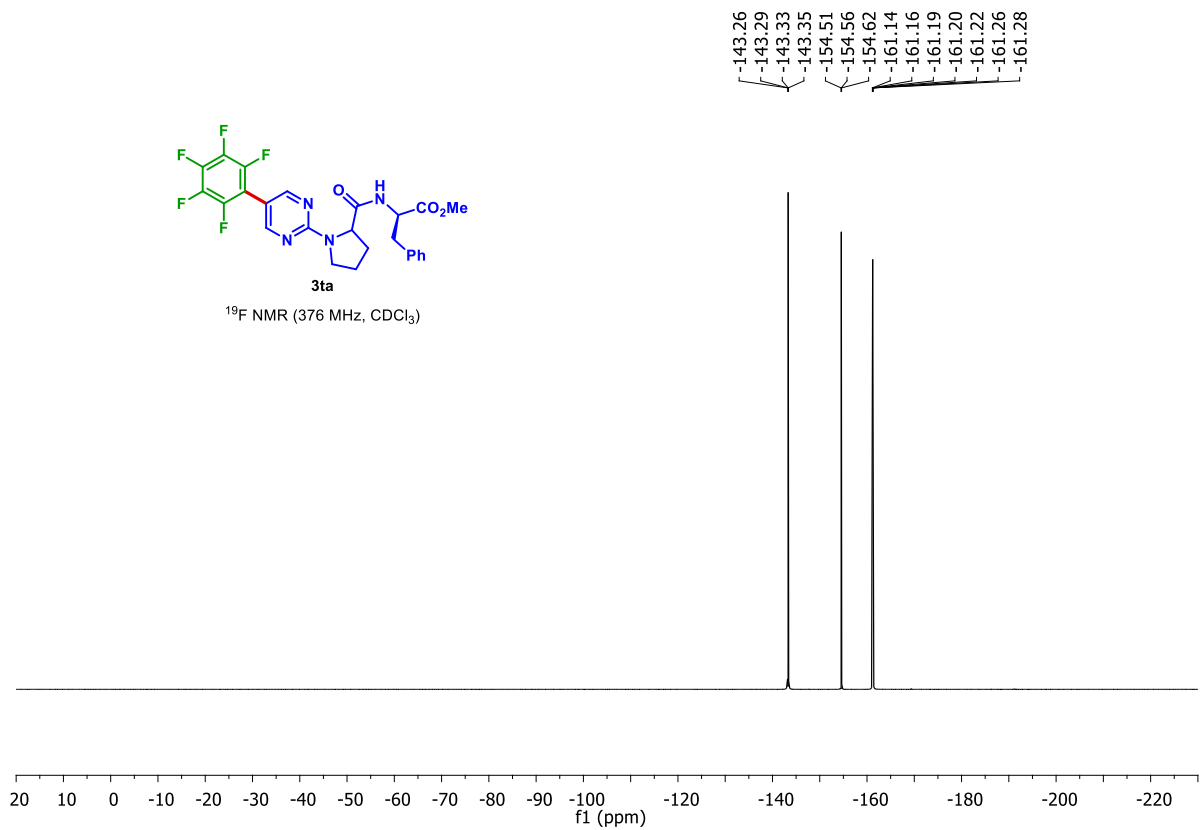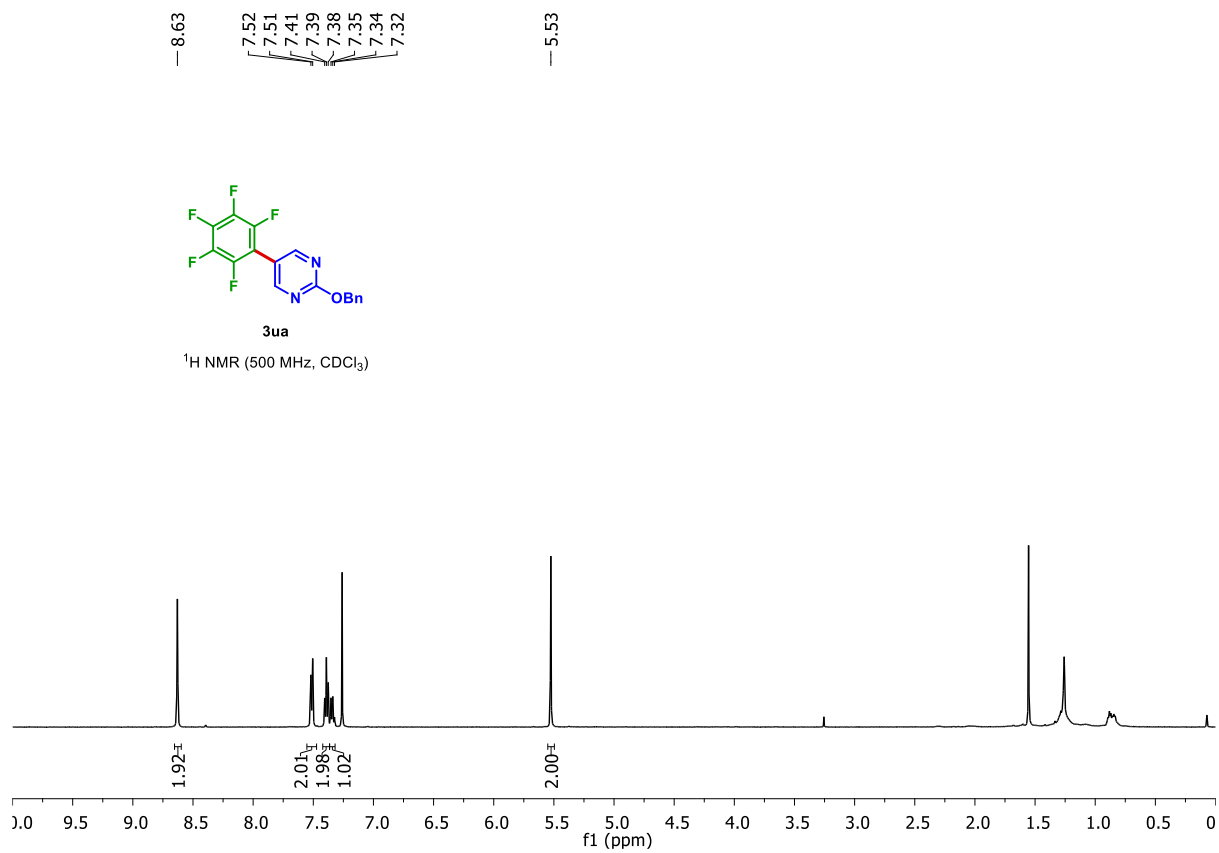

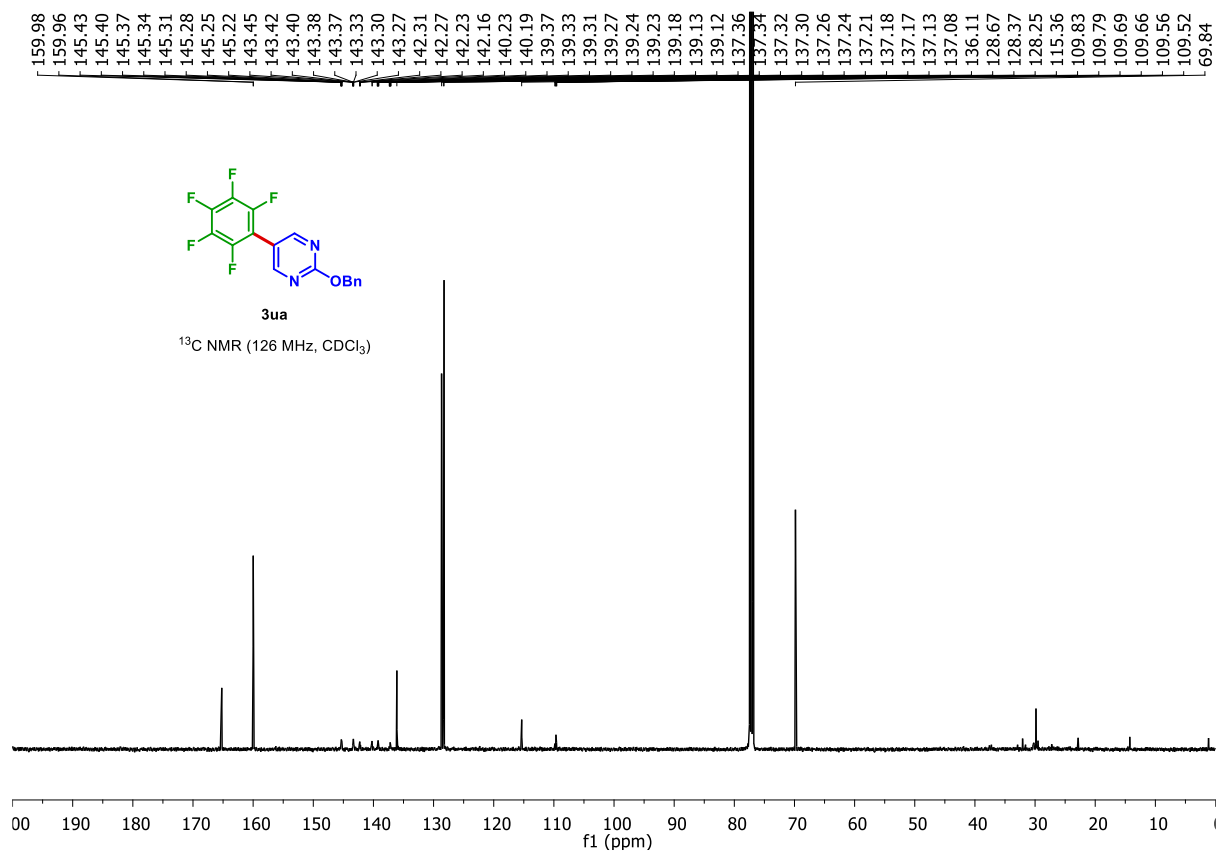

-142.74  
-142.75  
-142.78  
-142.80  
-152.75  
-152.79  
-152.83  
-160.57  
-160.59  
-160.62  
-160.63  
-160.66  
-160.68

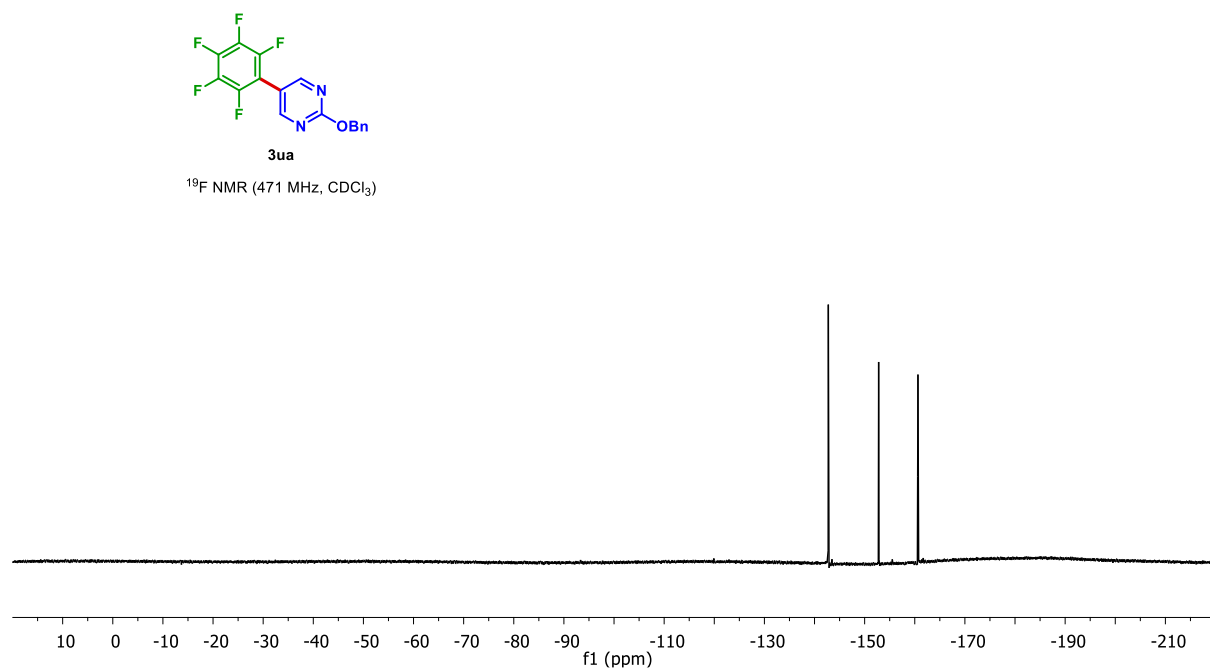

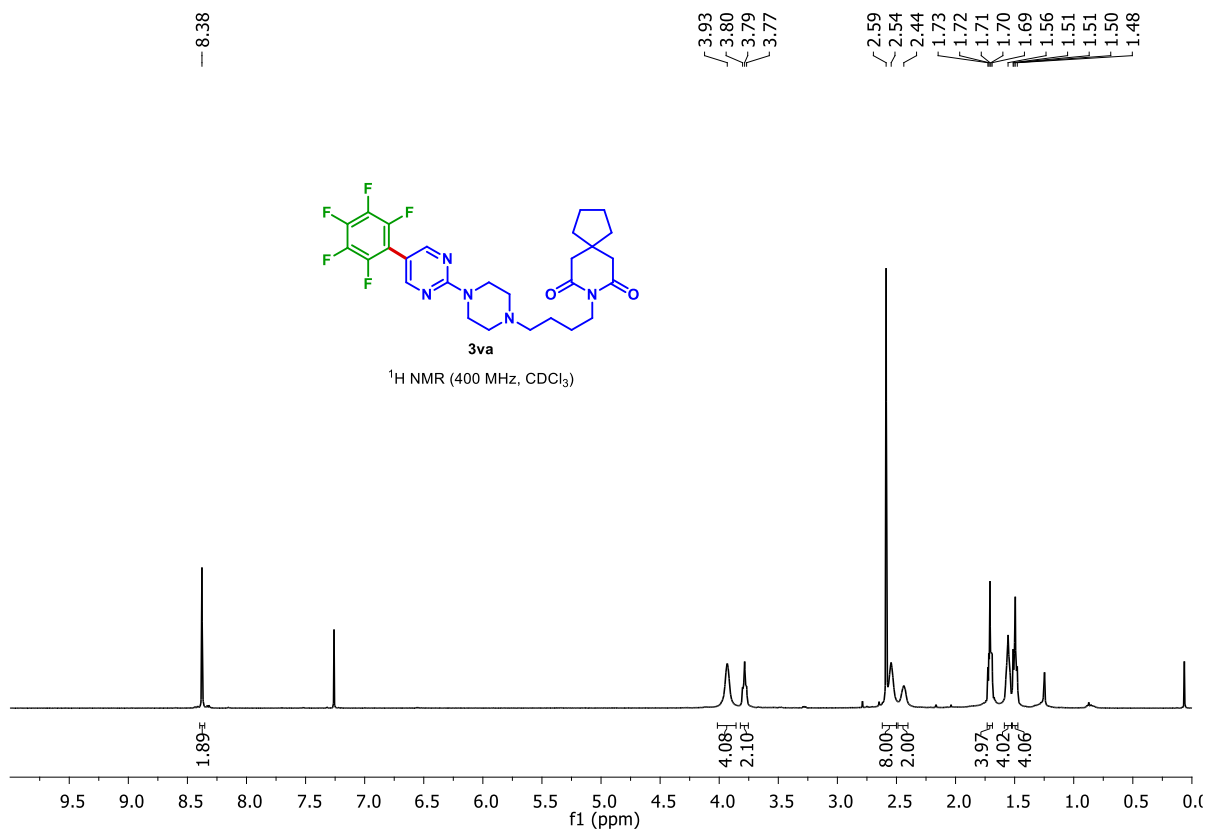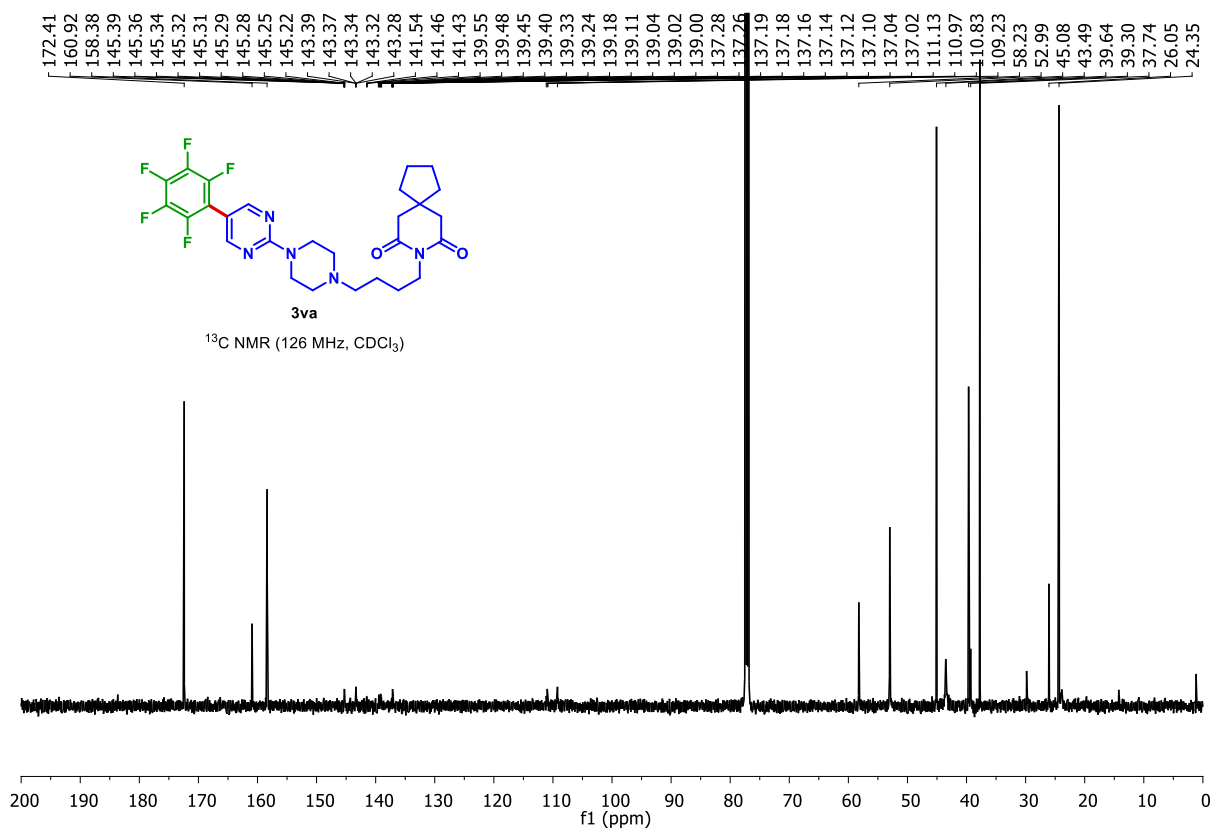

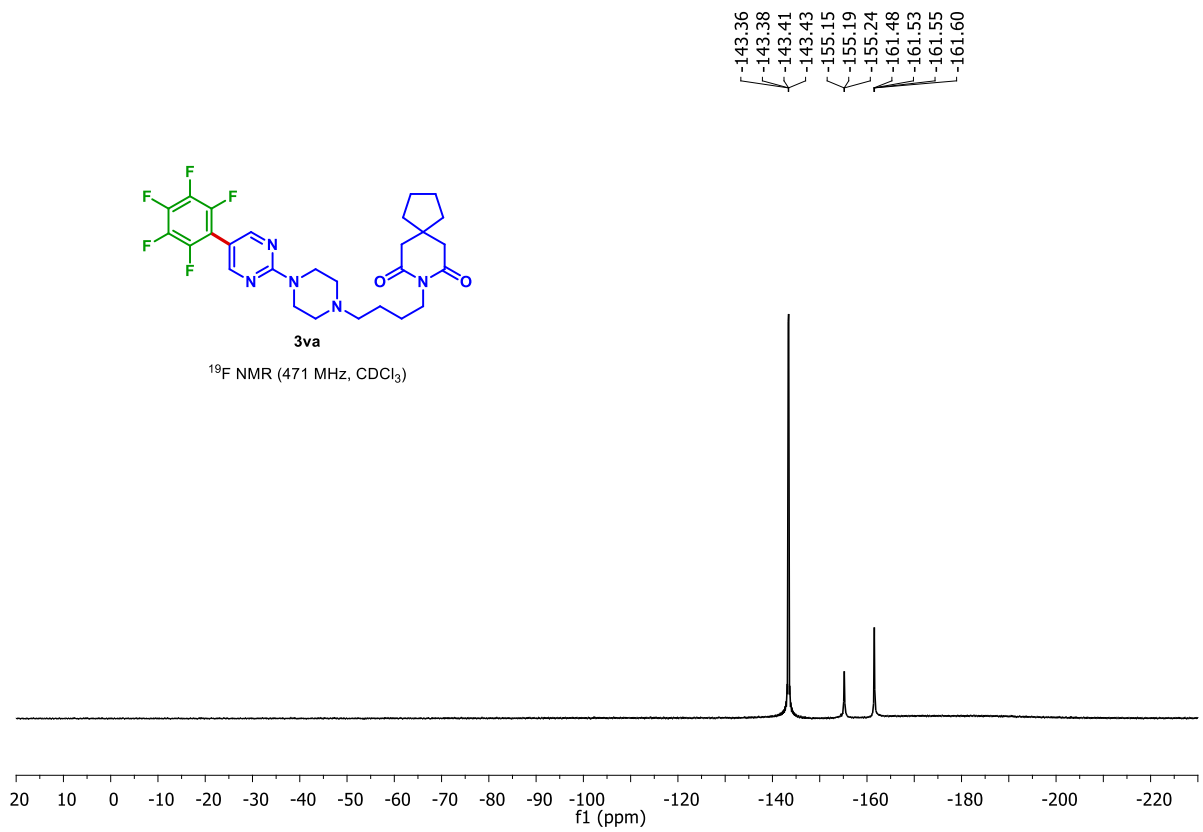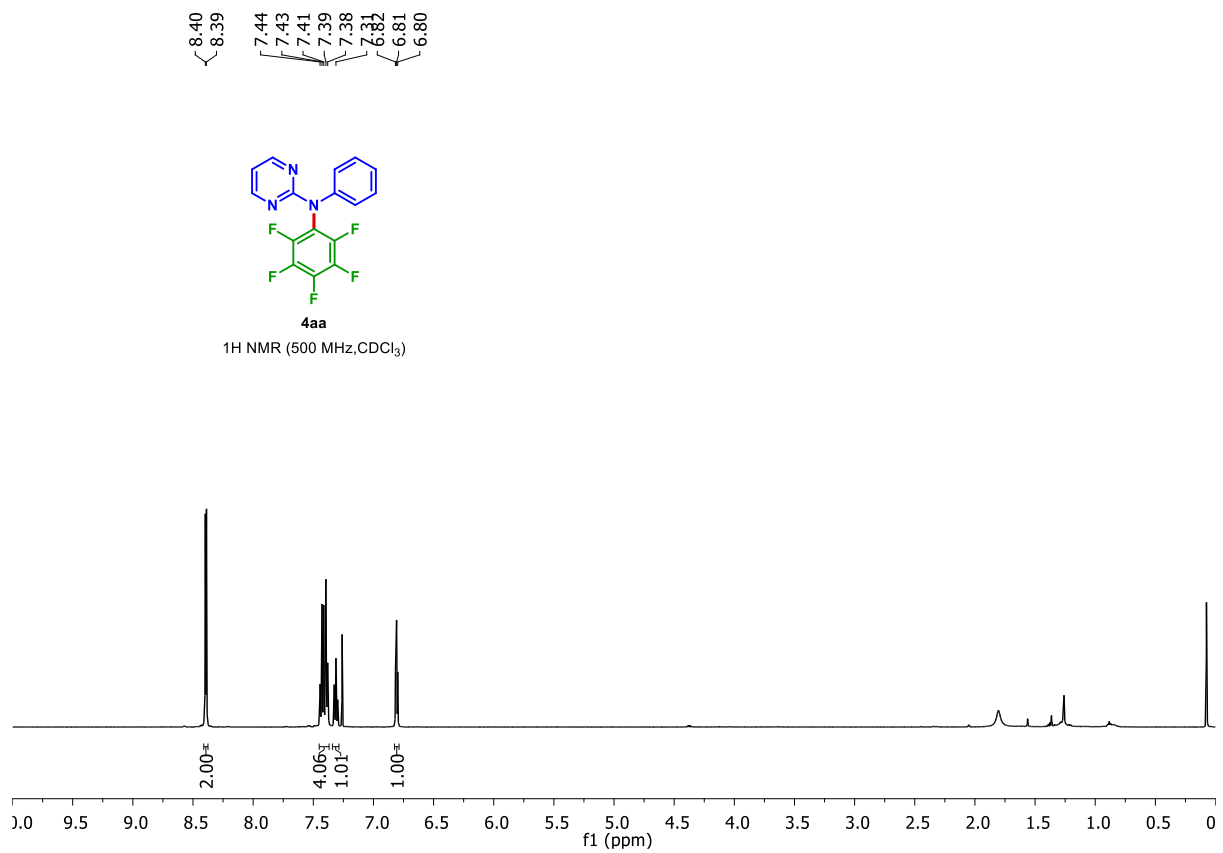

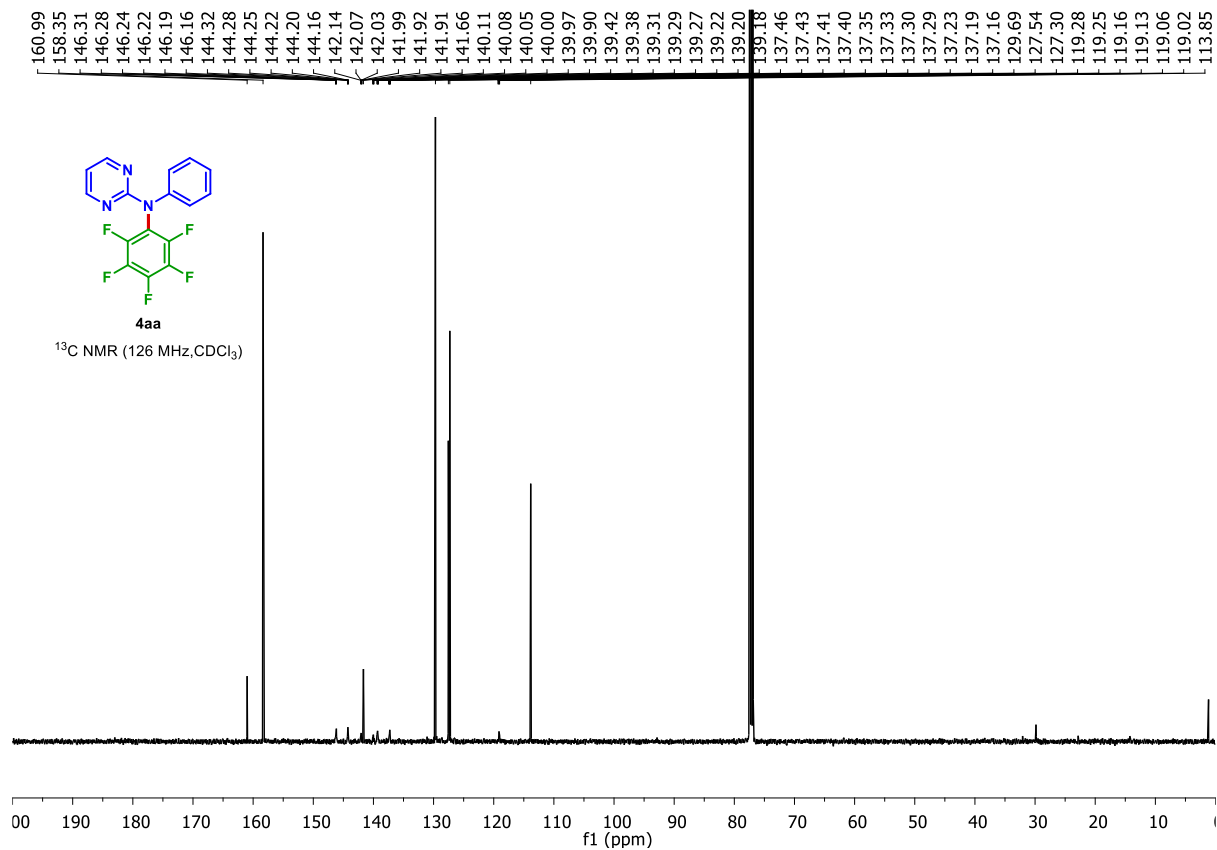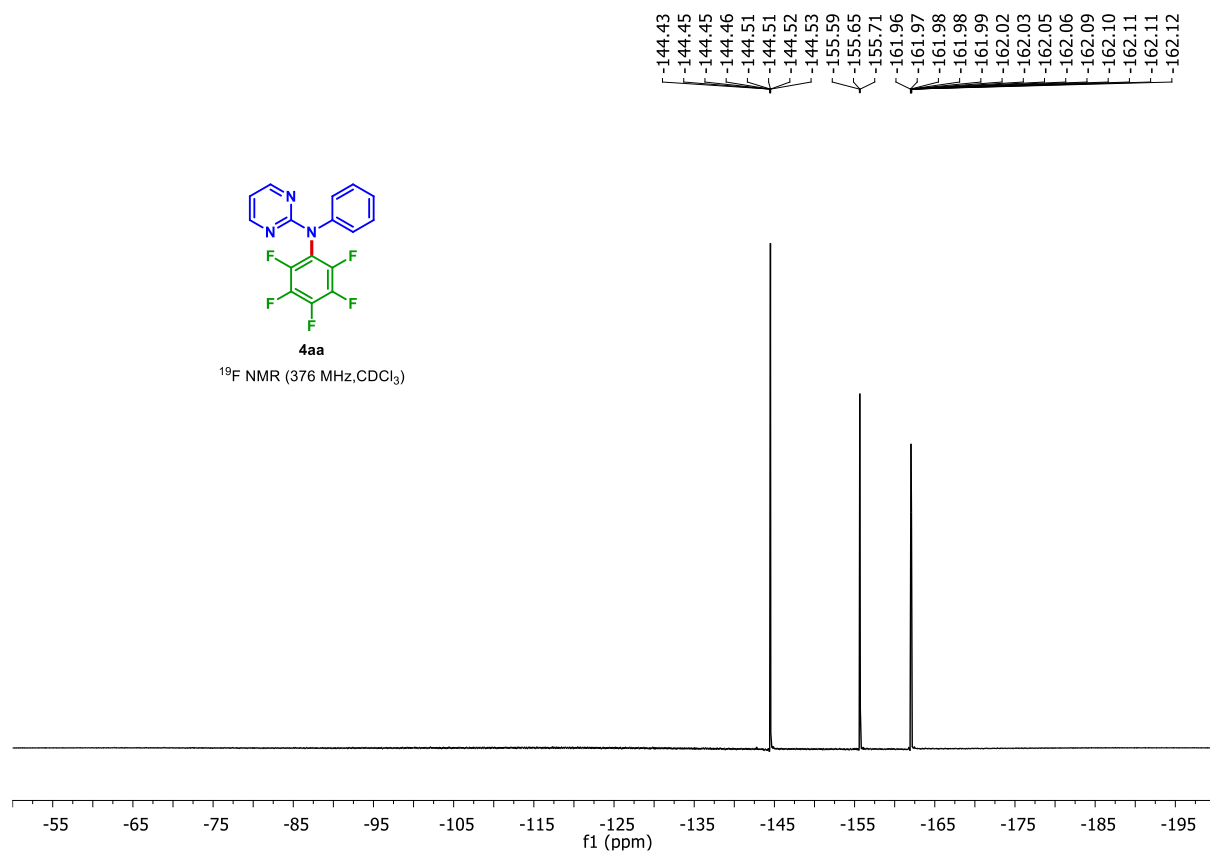

8.41  
8.40  
7.38  
7.37  
7.36  
7.35  
7.35  
7.34  
7.34  
7.34  
7.33  
7.33  
7.33  
7.32  
7.32  
7.31  
7.21  
7.19  
7.18  
7.17  
7.17  
6.85  
6.84  
6.83

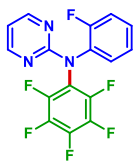

4ba

<sup>1</sup>H NMR (500 MHz, CDCl<sub>3</sub>)

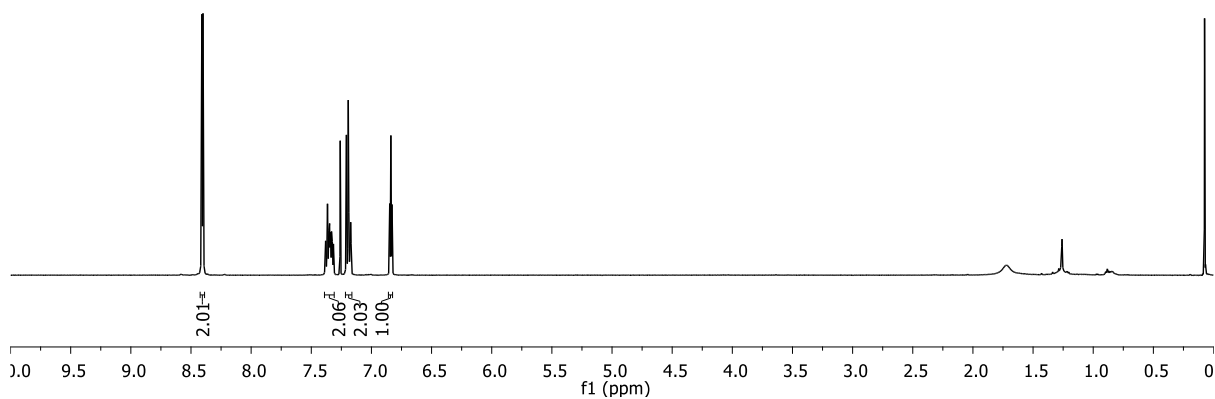

160.28  
159.87  
158.46  
157.36  
146.50  
146.47  
146.43  
146.39  
146.35  
146.31  
146.27  
146.25  
144.00  
143.96  
143.92  
143.89  
143.85  
143.81  
143.75  
142.25  
139.72  
139.68  
139.63  
139.59  
139.54  
139.47  
139.43  
139.40  
139.35  
139.33  
139.30  
139.27  
137.05  
137.01  
136.99  
136.95  
136.93  
136.90  
136.84  
136.82  
129.57  
129.49  
129.10  
128.98  
124.99  
124.95  
118.38  
118.36  
118.28  
118.27  
118.24  
118.13  
118.09  
117.15  
116.95  
114.28

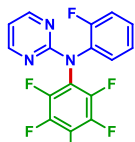

4ba

<sup>13</sup>C NMR (101 MHz, CDCl<sub>3</sub>)

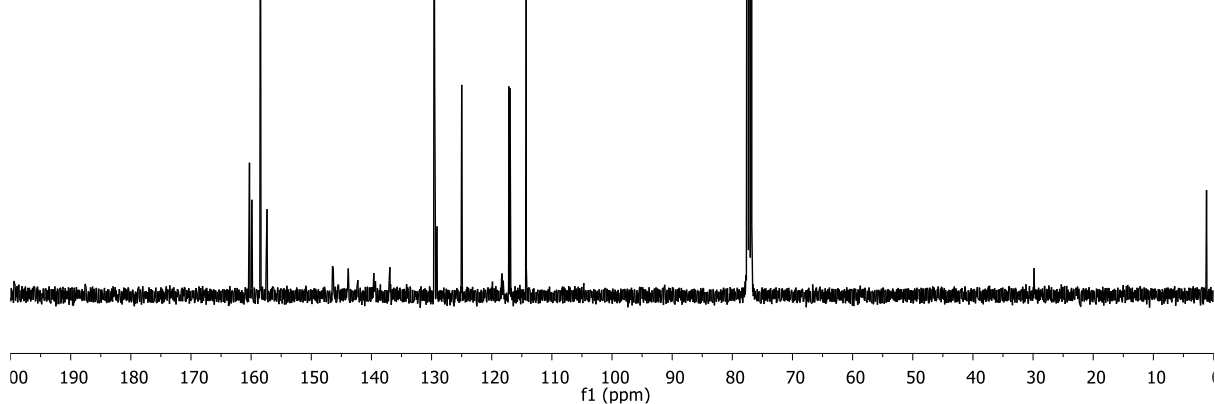

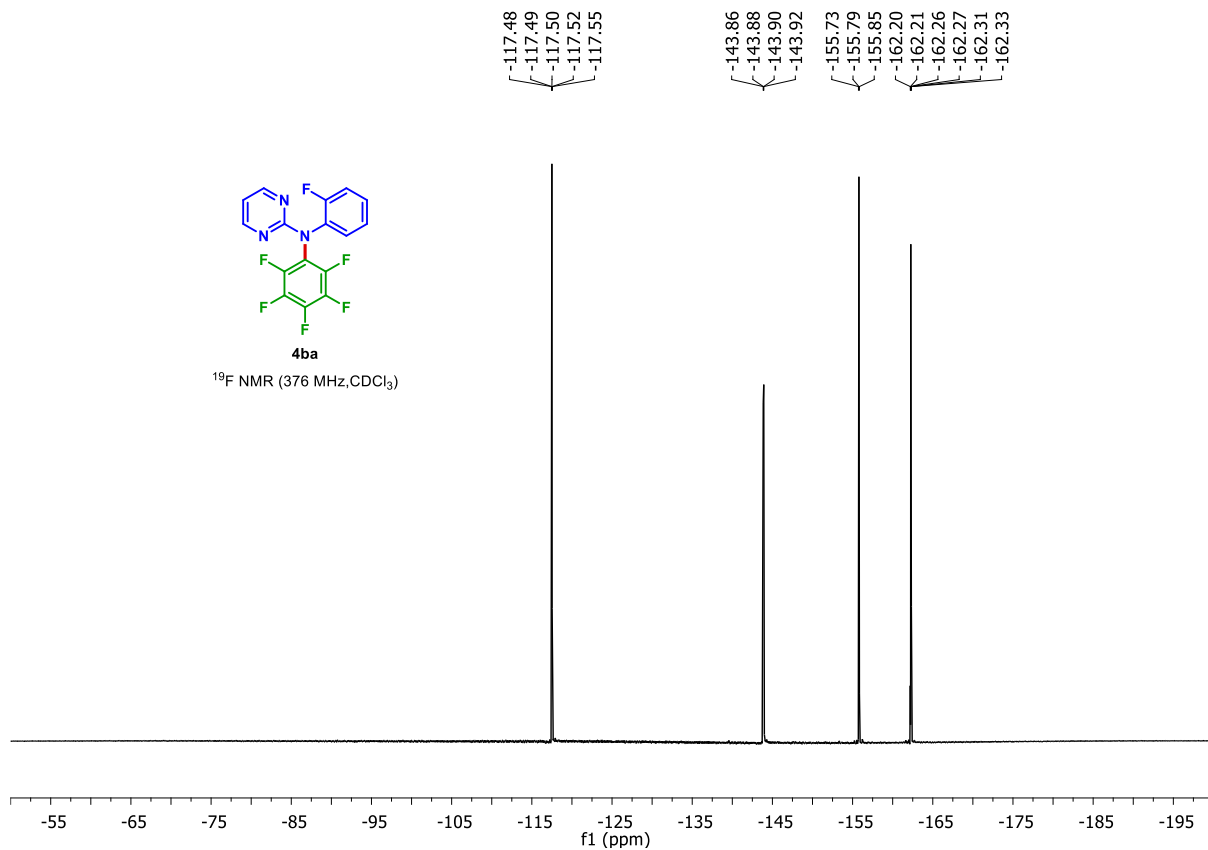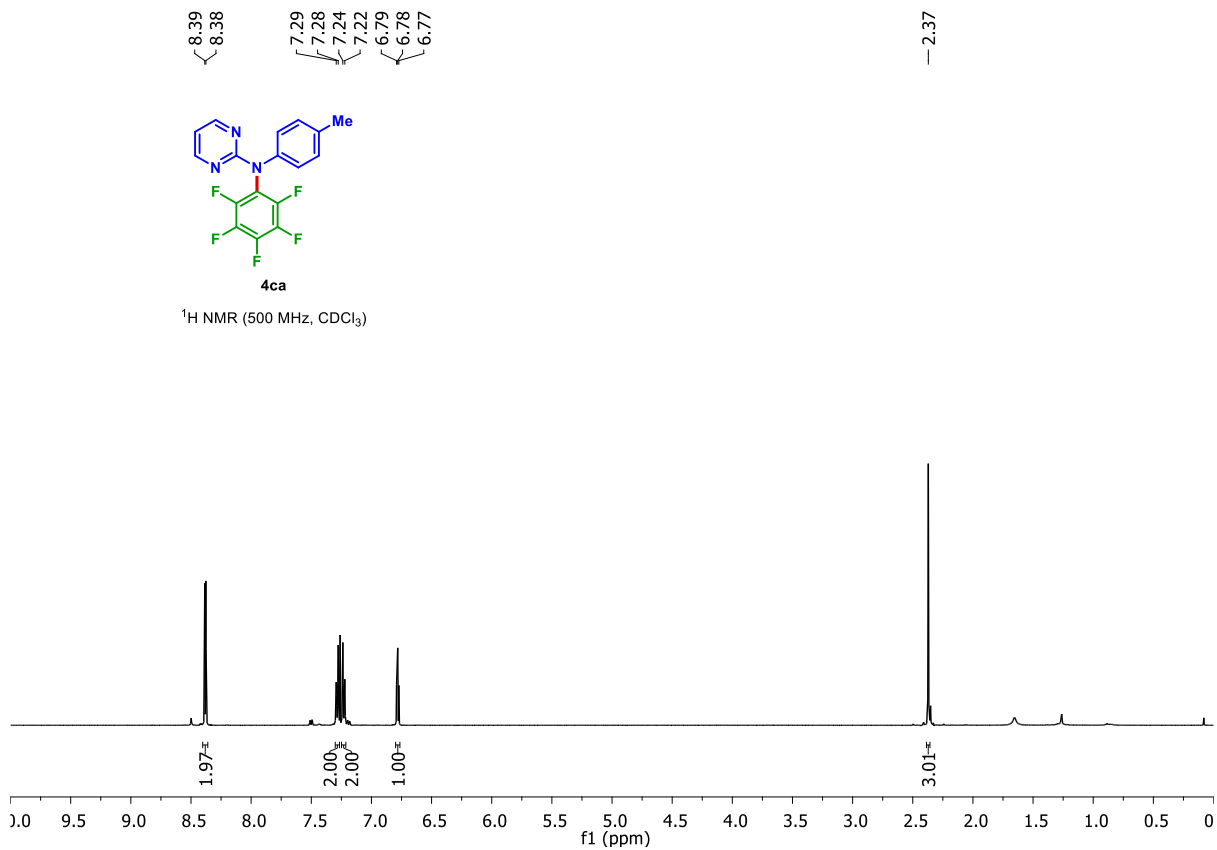



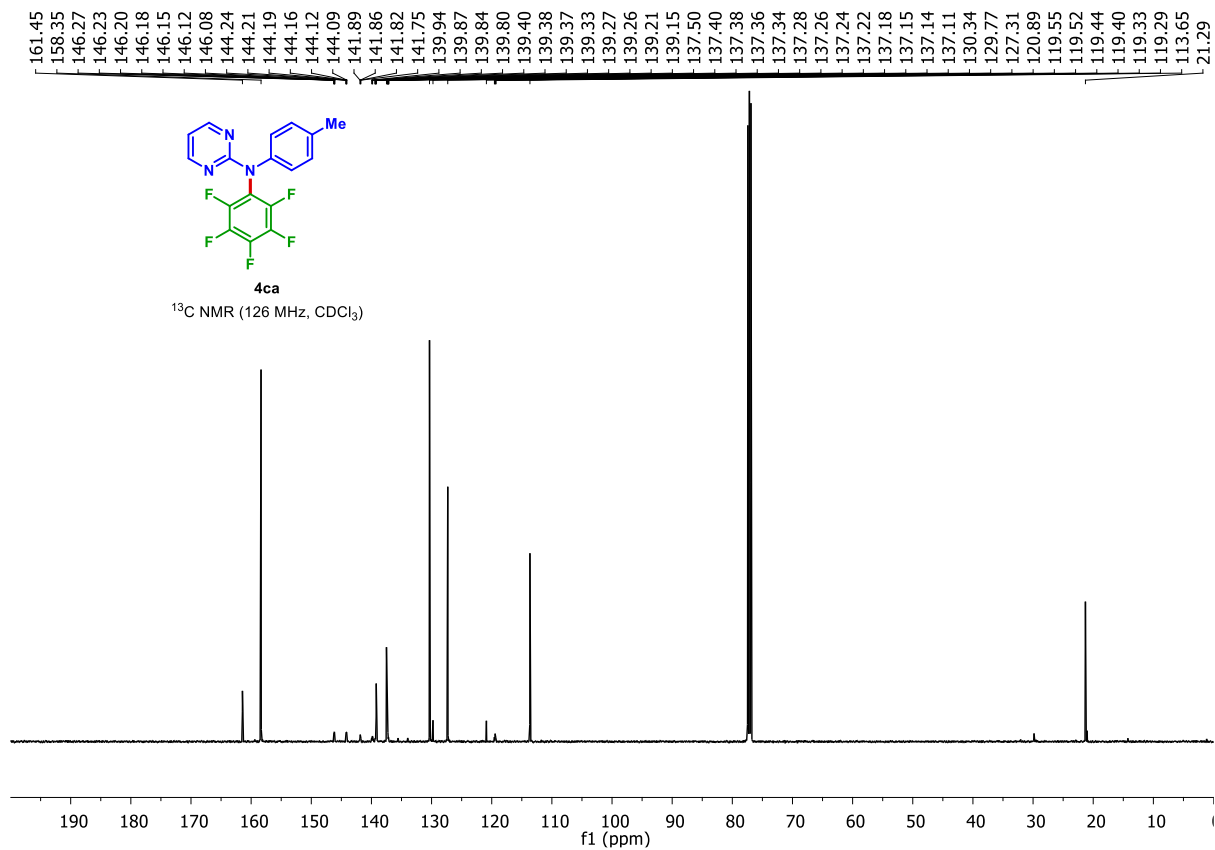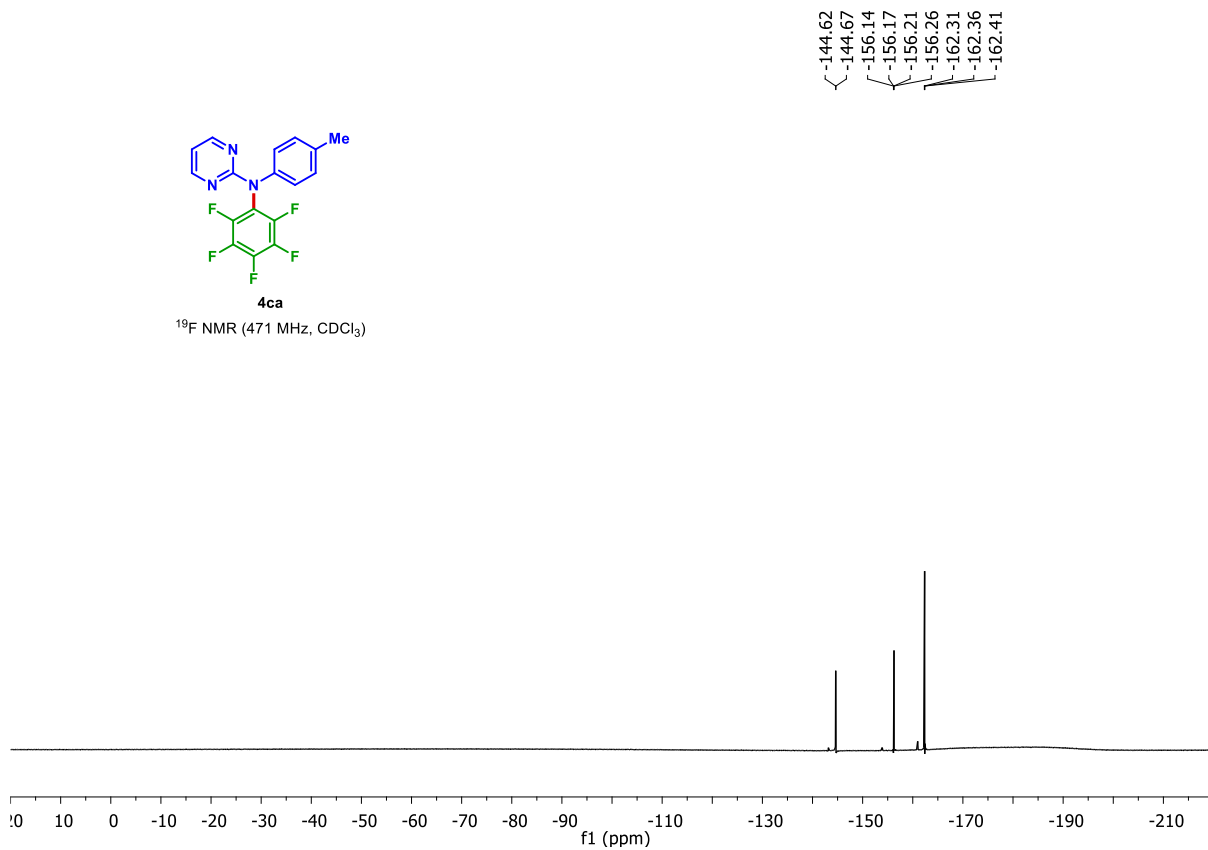

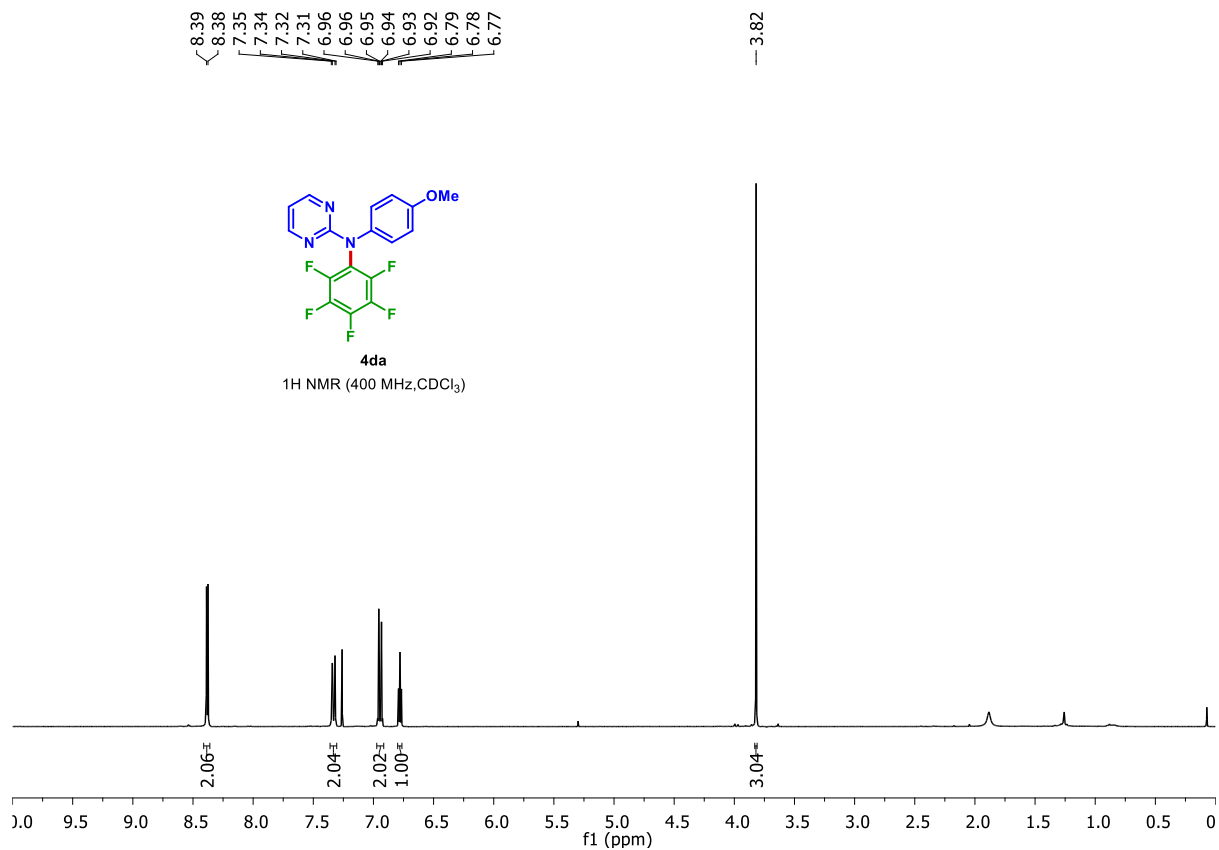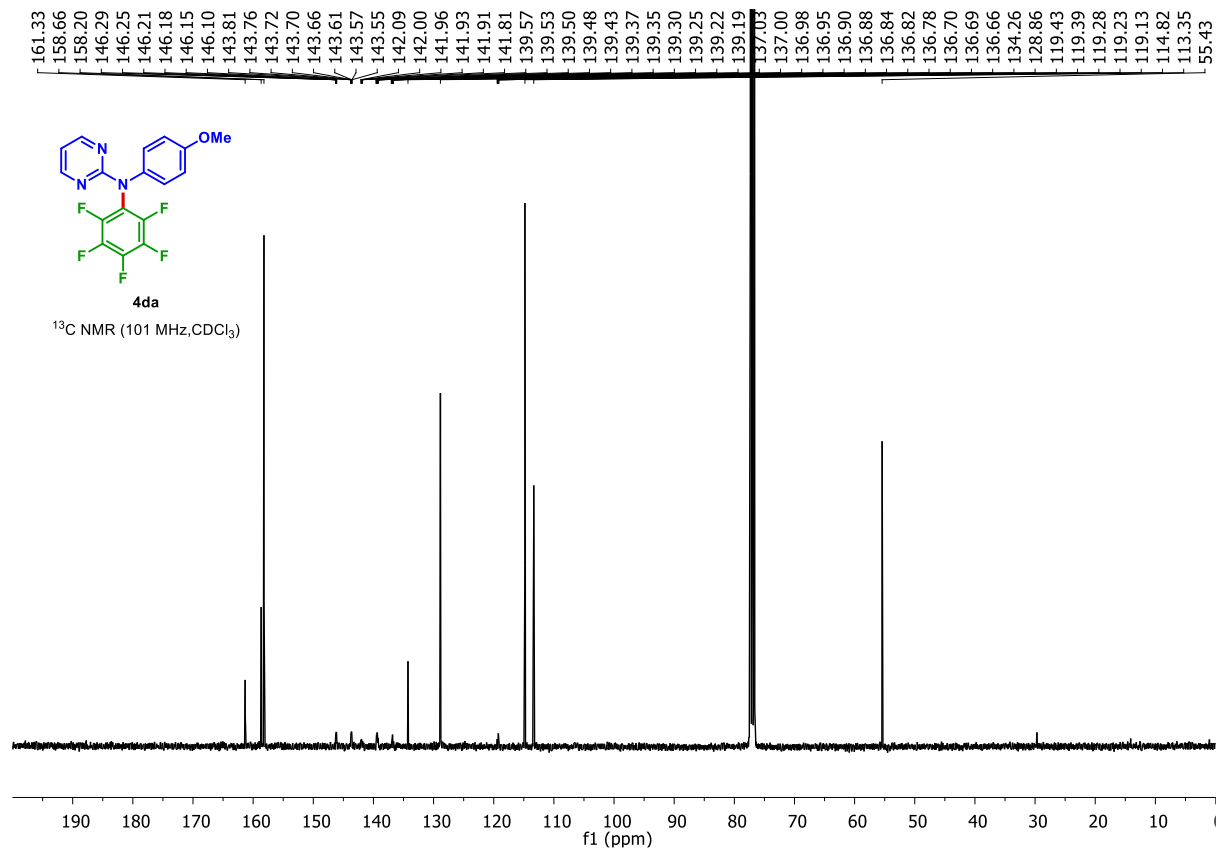

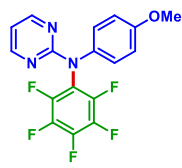

4da

<sup>19</sup>F NMR (471 MHz, CDCl<sub>3</sub>)

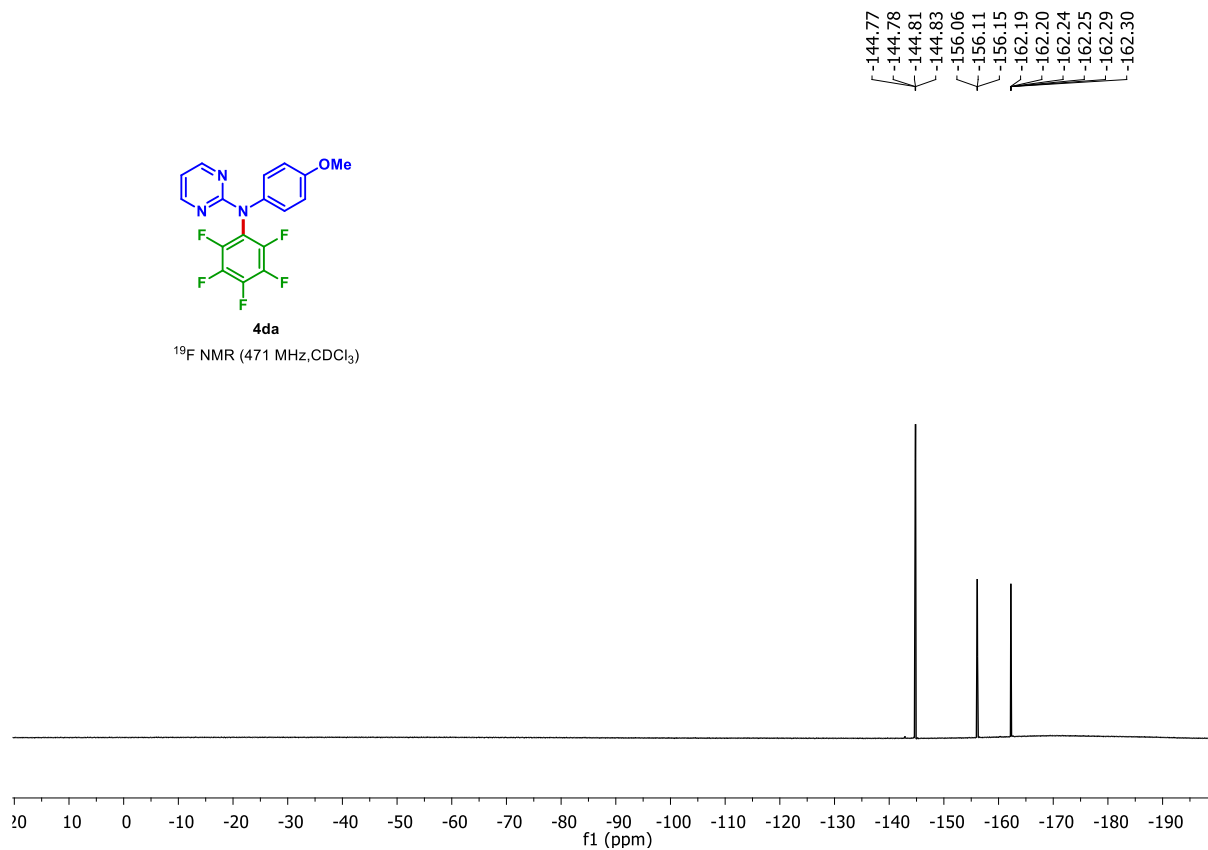

8.43  
8.42  
7.67  
7.65  
7.48  
7.47  
6.89  
6.88  
6.87

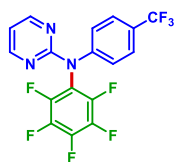

4ea

<sup>1</sup>H NMR (500 MHz, CDCl<sub>3</sub>)

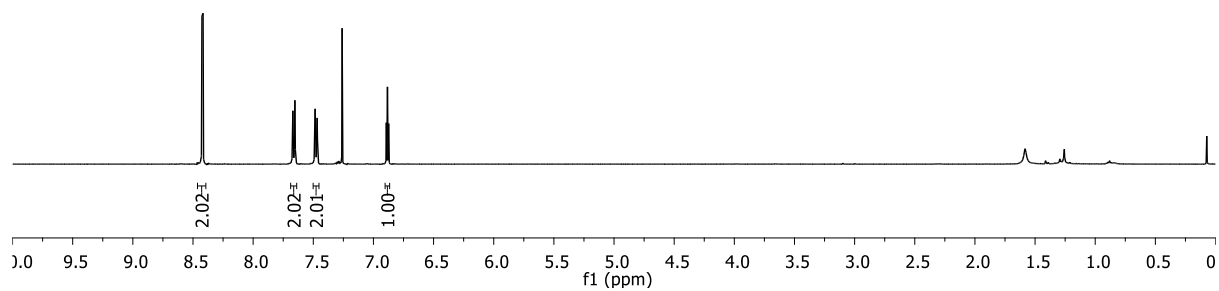

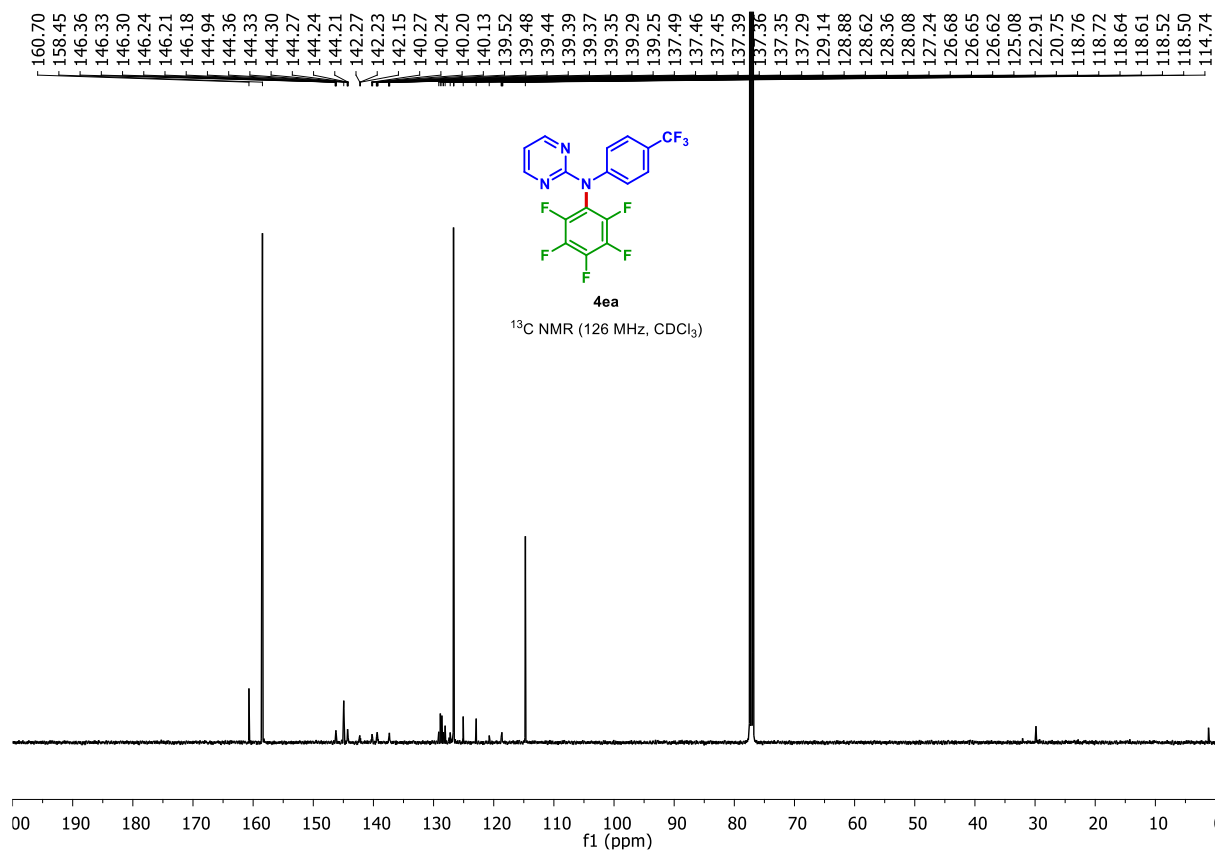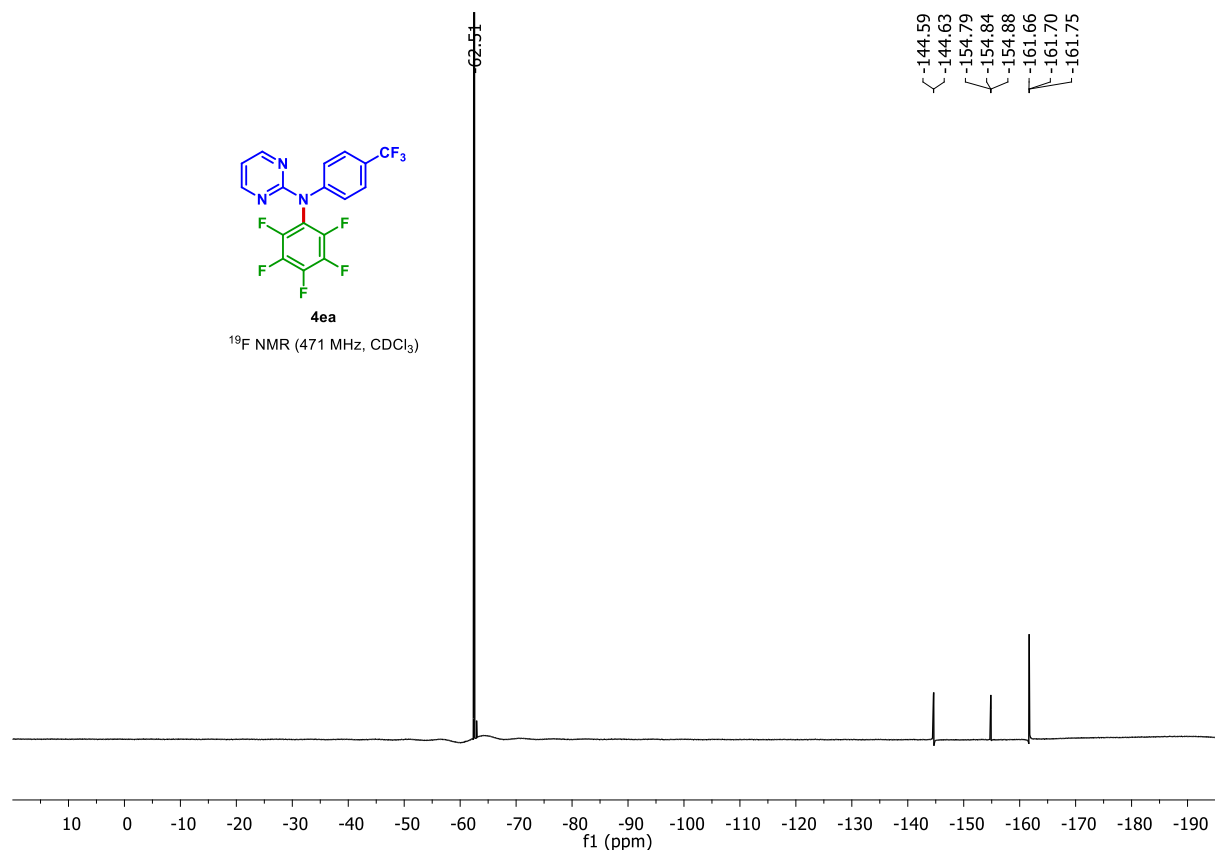

8.39  
8.38  
7.39  
7.38  
7.38  
7.37  
7.36  
7.13  
7.12  
7.12  
7.11  
7.11  
7.10  
7.09  
6.82  
6.81  
6.80

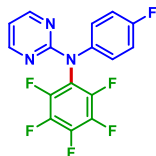

4fa

<sup>1</sup>H NMR (500 MHz, CDCl<sub>3</sub>)

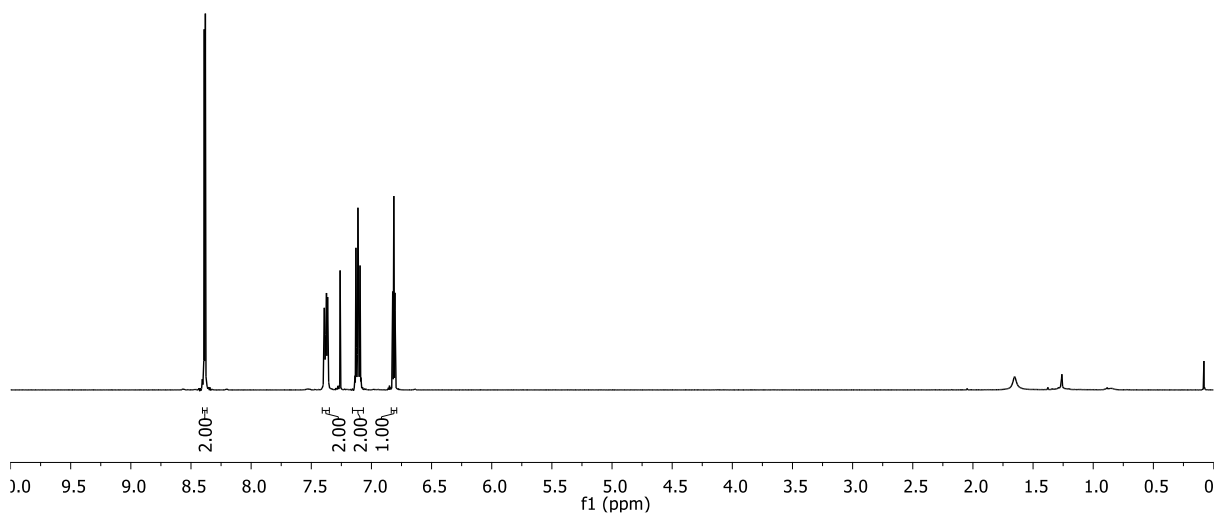

162.49  
161.27  
160.52  
158.38  
146.26  
146.23  
146.20  
146.17  
146.14  
146.11  
146.08  
144.27  
144.24  
144.20  
144.18  
144.15  
144.12  
144.08  
142.07  
142.03  
141.99  
140.11  
140.04  
140.01  
139.97  
139.90  
139.41  
139.40  
139.33  
139.31  
139.30  
139.27  
139.21  
139.19  
139.14  
137.73  
137.70  
137.44  
137.41  
137.39  
137.37  
137.31  
137.29  
137.27  
137.25  
137.21  
137.18  
137.17  
129.46  
129.39  
119.16  
119.13  
119.05  
116.70  
116.51  
113.93

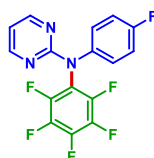

4fa

<sup>13</sup>C NMR (126 MHz, CDCl<sub>3</sub>)

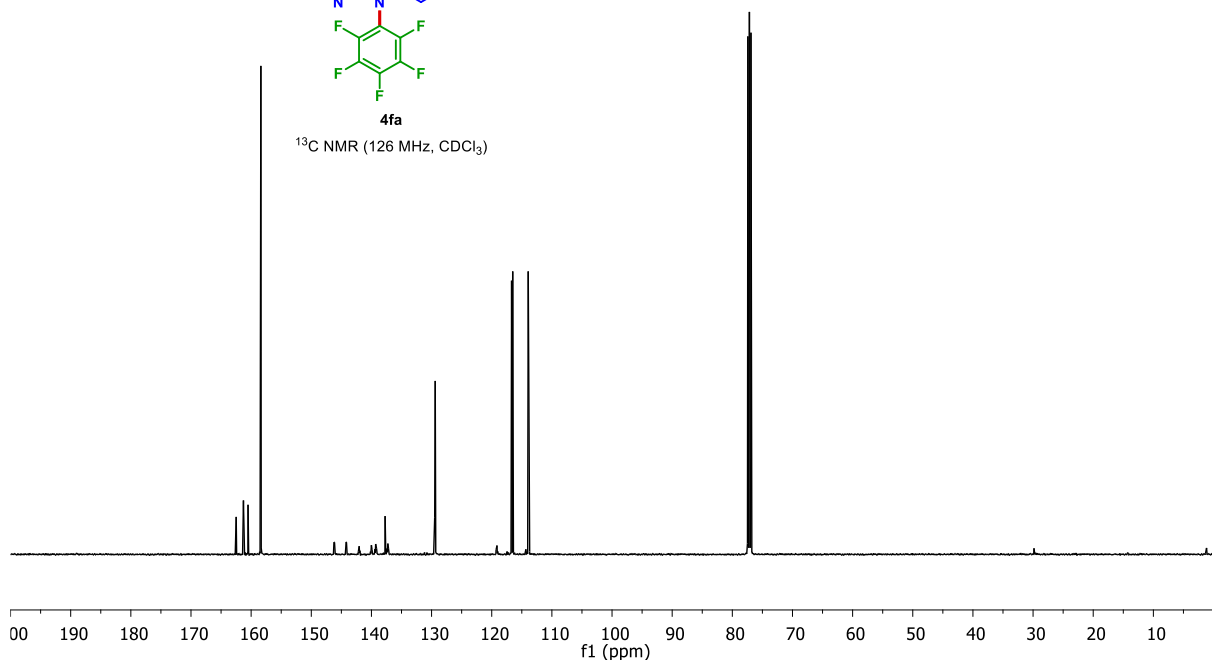

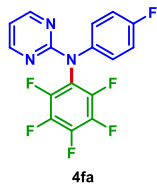

<sup>19</sup>F NMR (471 MHz, CDCl<sub>3</sub>)

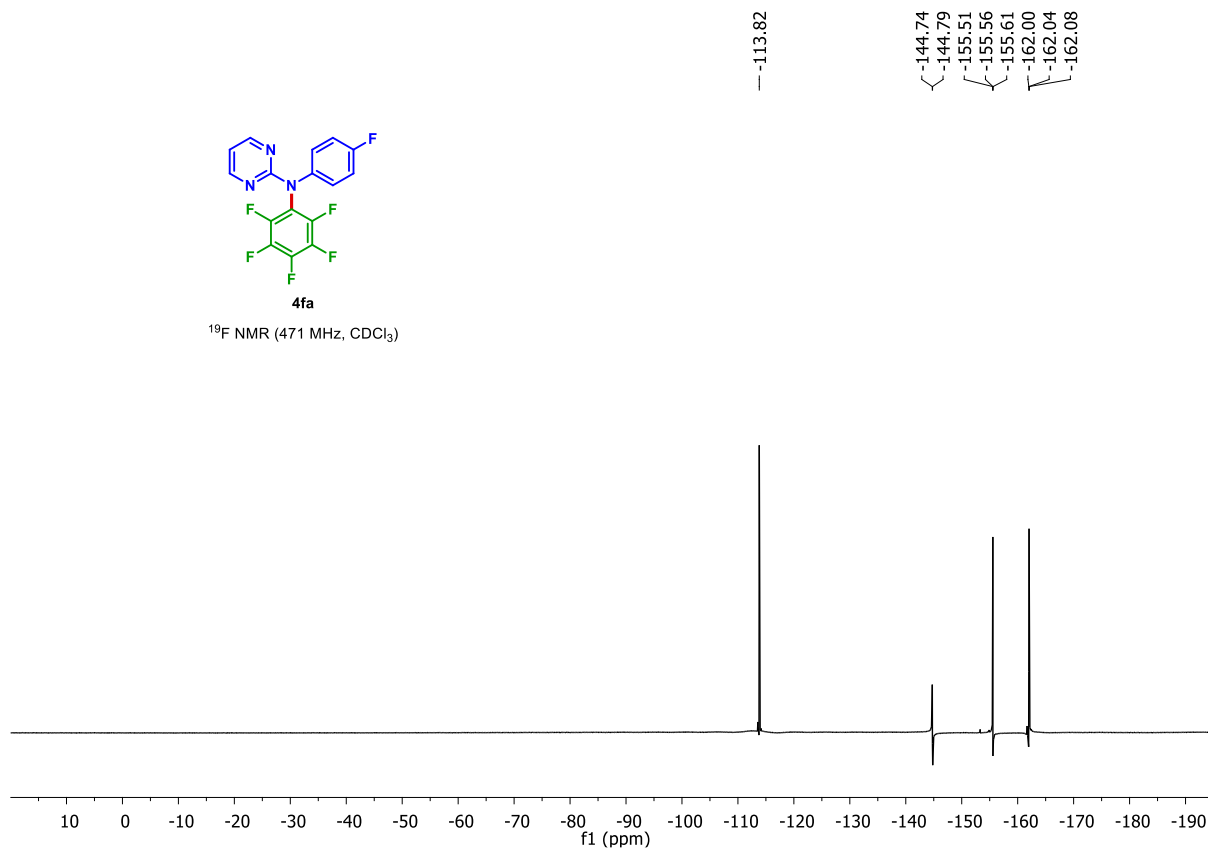

Chemical shift values (ppm): 8.41, 8.40, 7.38, 7.35, 7.33, 7.29, 7.28, 6.85, 6.84, 6.84.

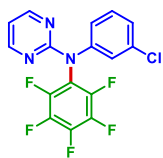

<sup>1</sup>H NMR (500 MHz, CDCl<sub>3</sub>)

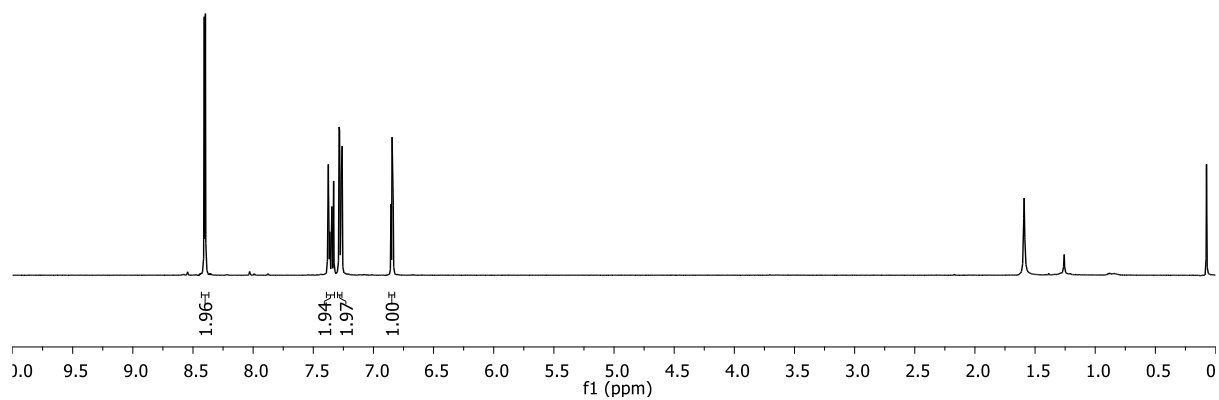

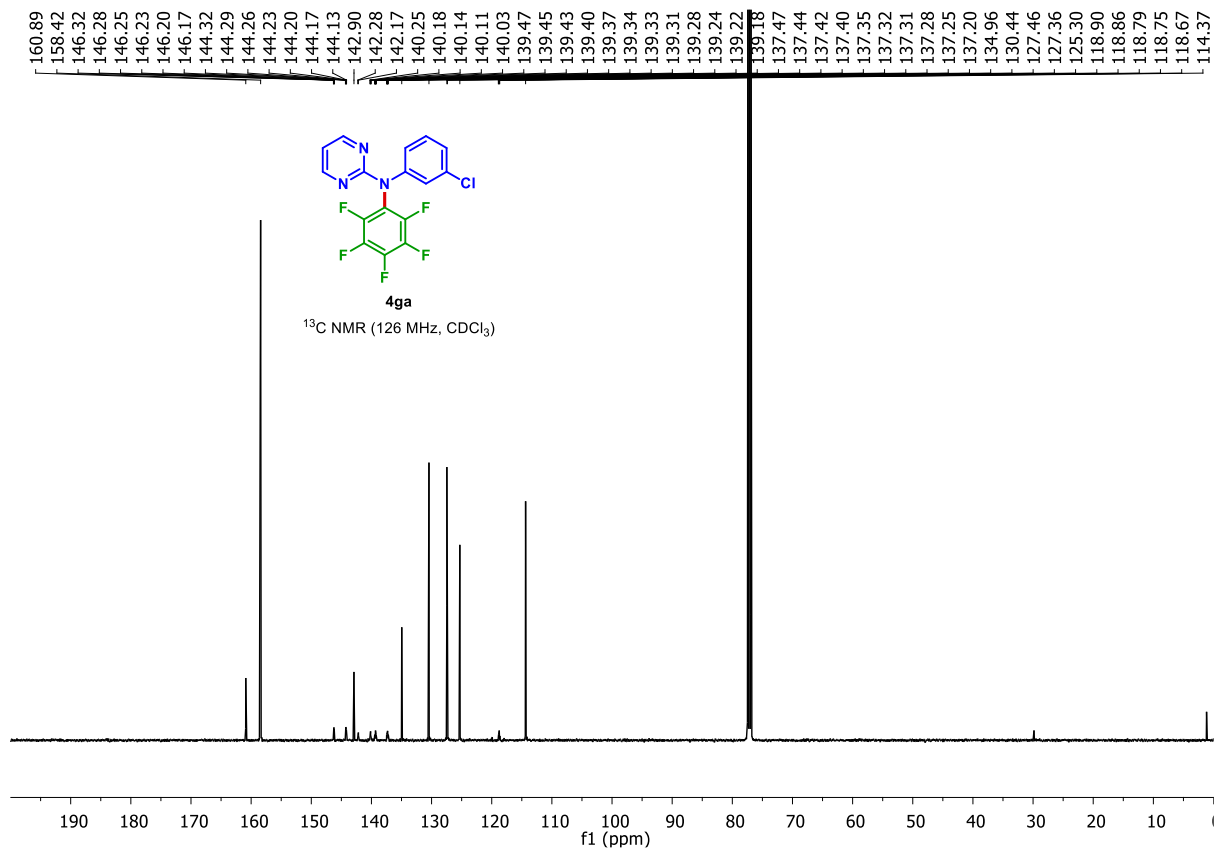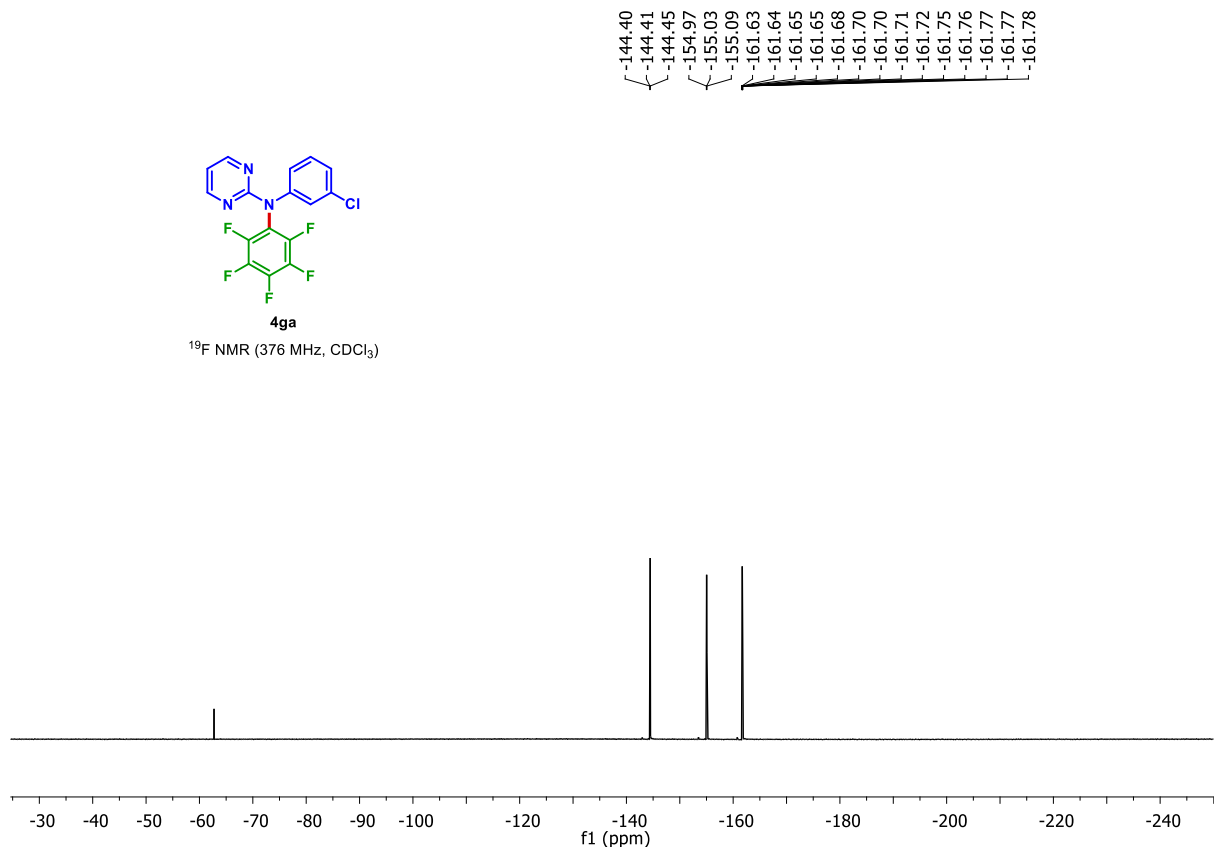

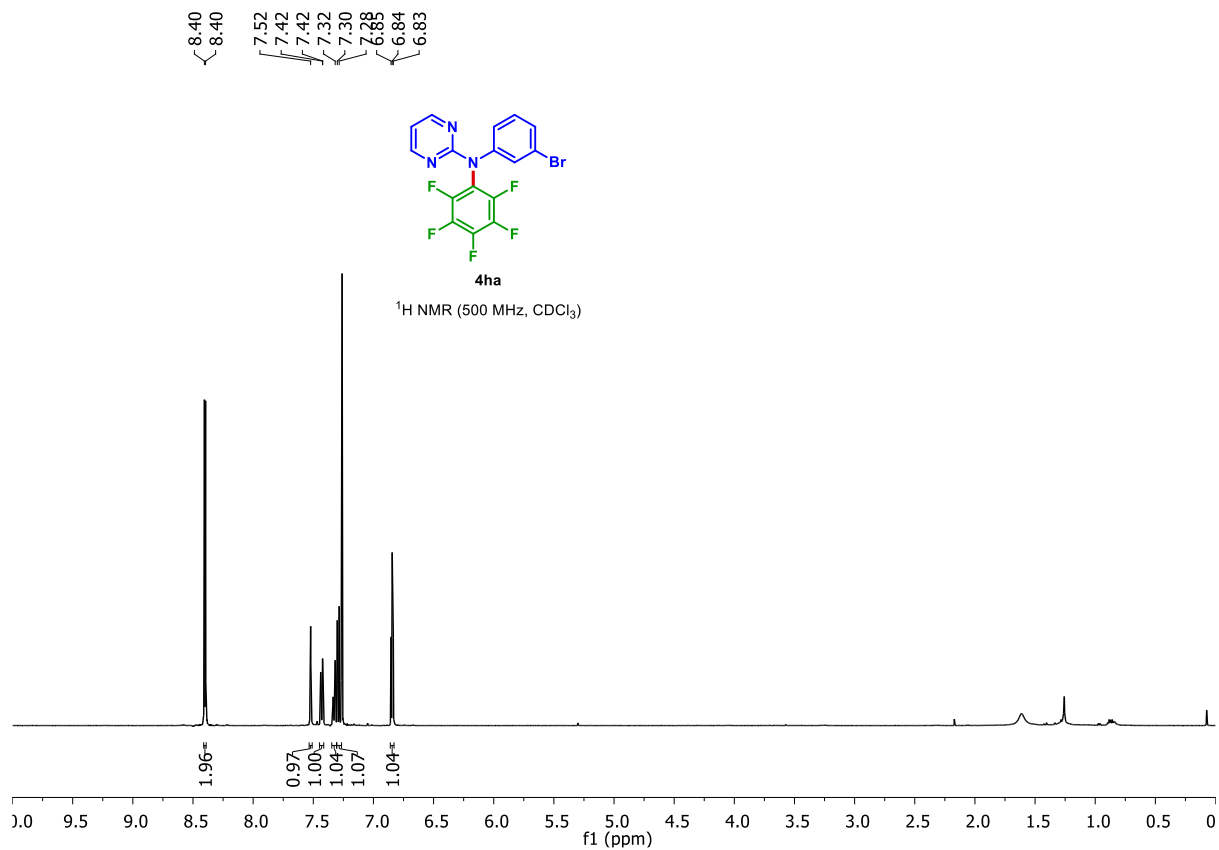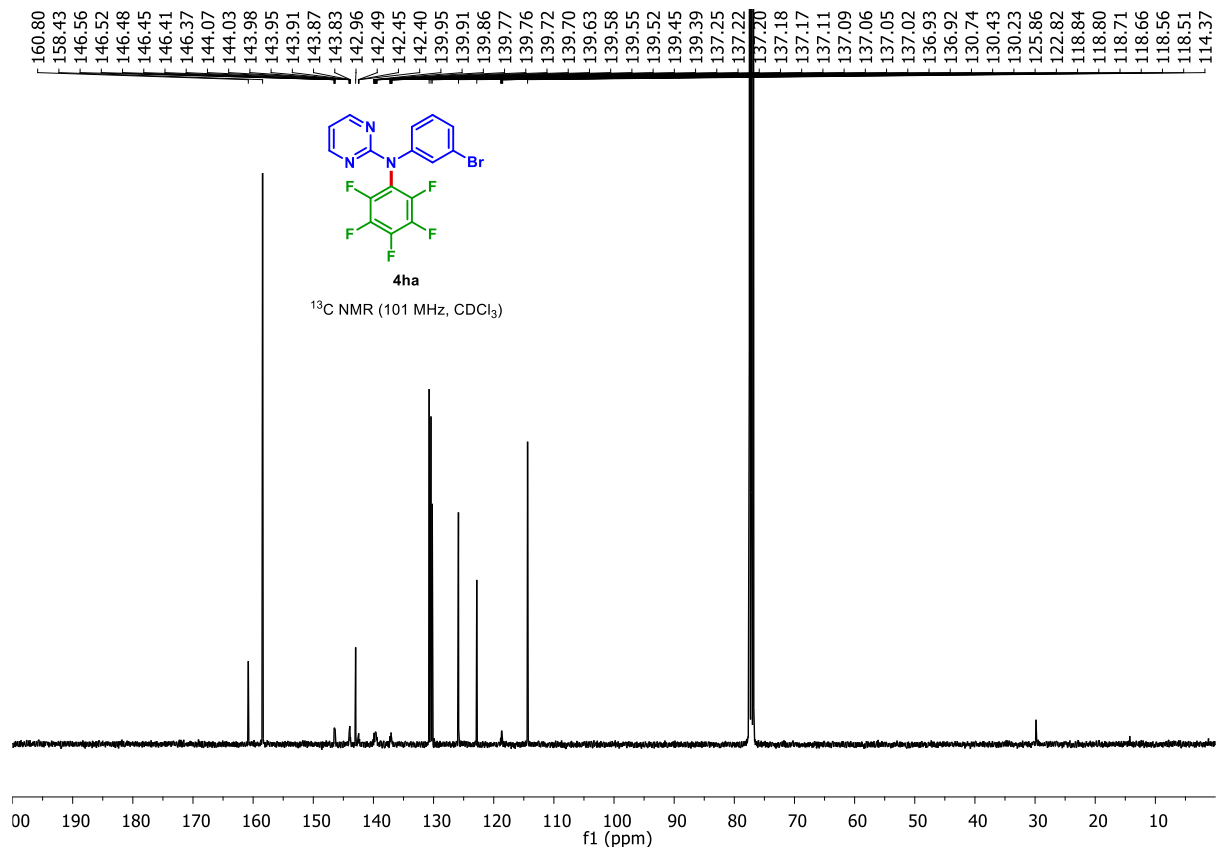



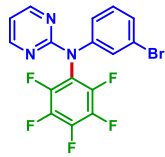

4ha

<sup>19</sup>F NMR (471 MHz, CDCl<sub>3</sub>)

-144.52  
-144.56  
-155.09  
-155.14  
-155.18  
-161.78  
-161.83

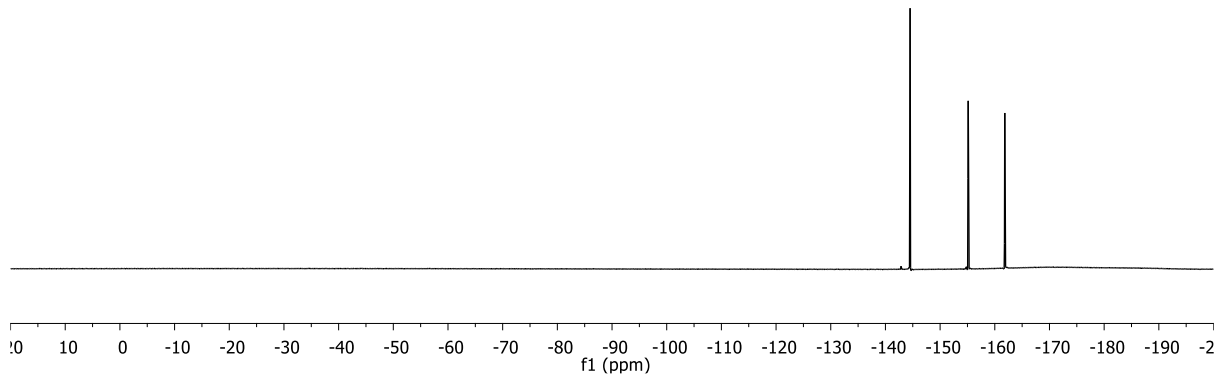

8.42  
8.41  
7.59  
7.59  
7.58  
7.57  
7.44  
6.84  
6.82  
6.81

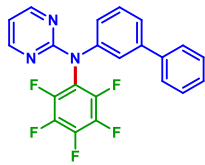

4ia

<sup>1</sup>H NMR (400 MHz, CDCl<sub>3</sub>)

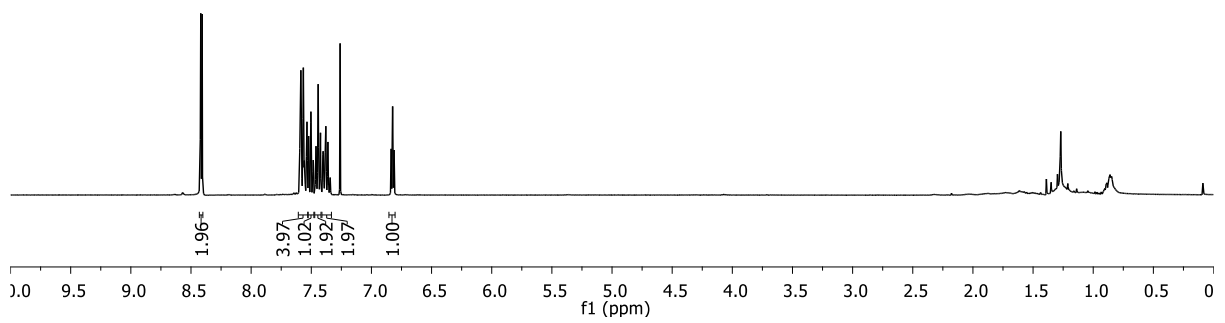

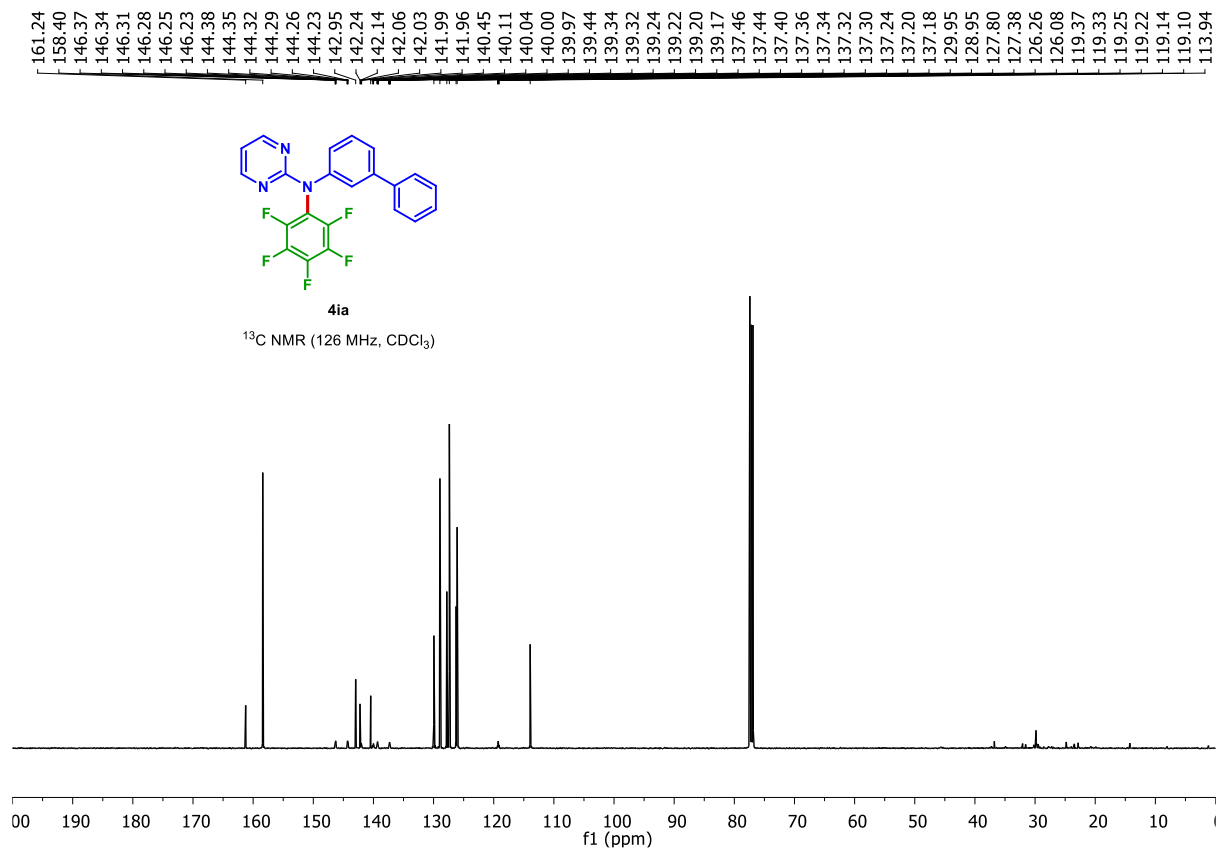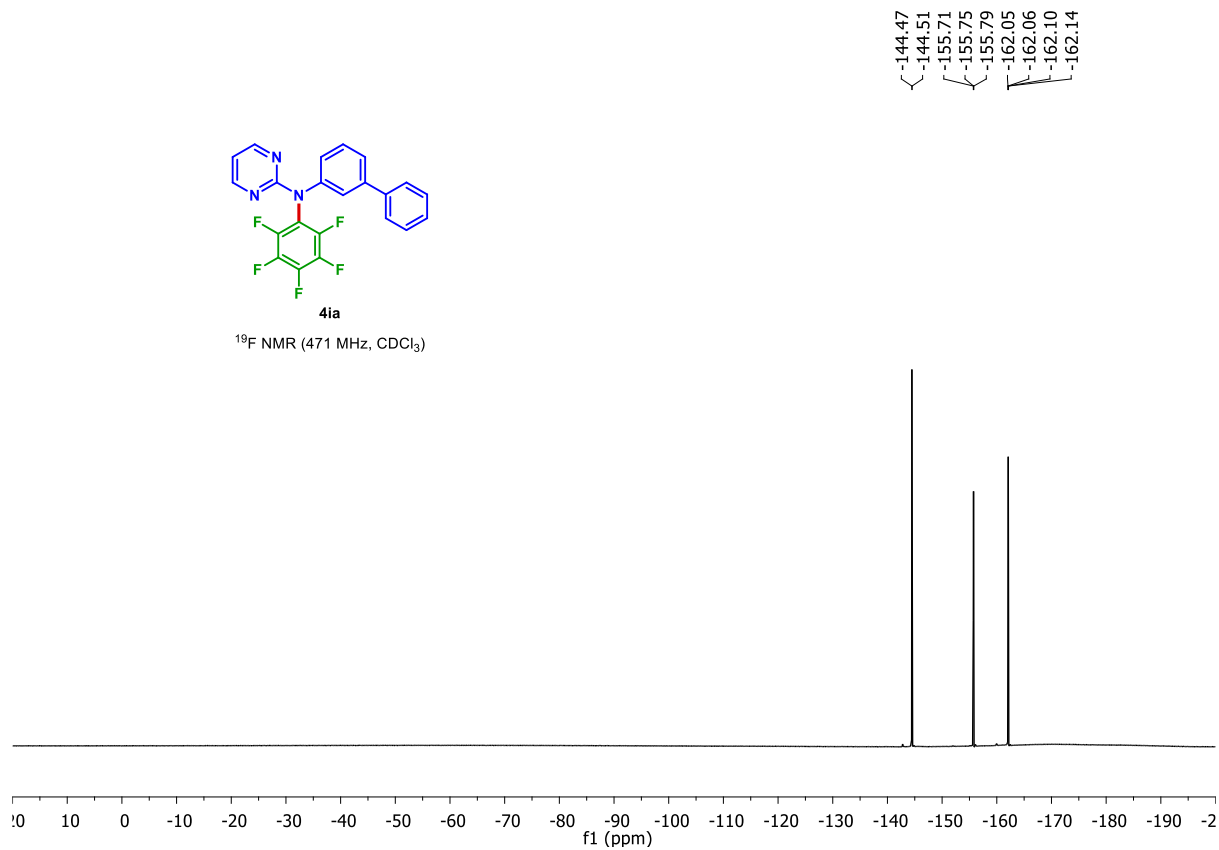

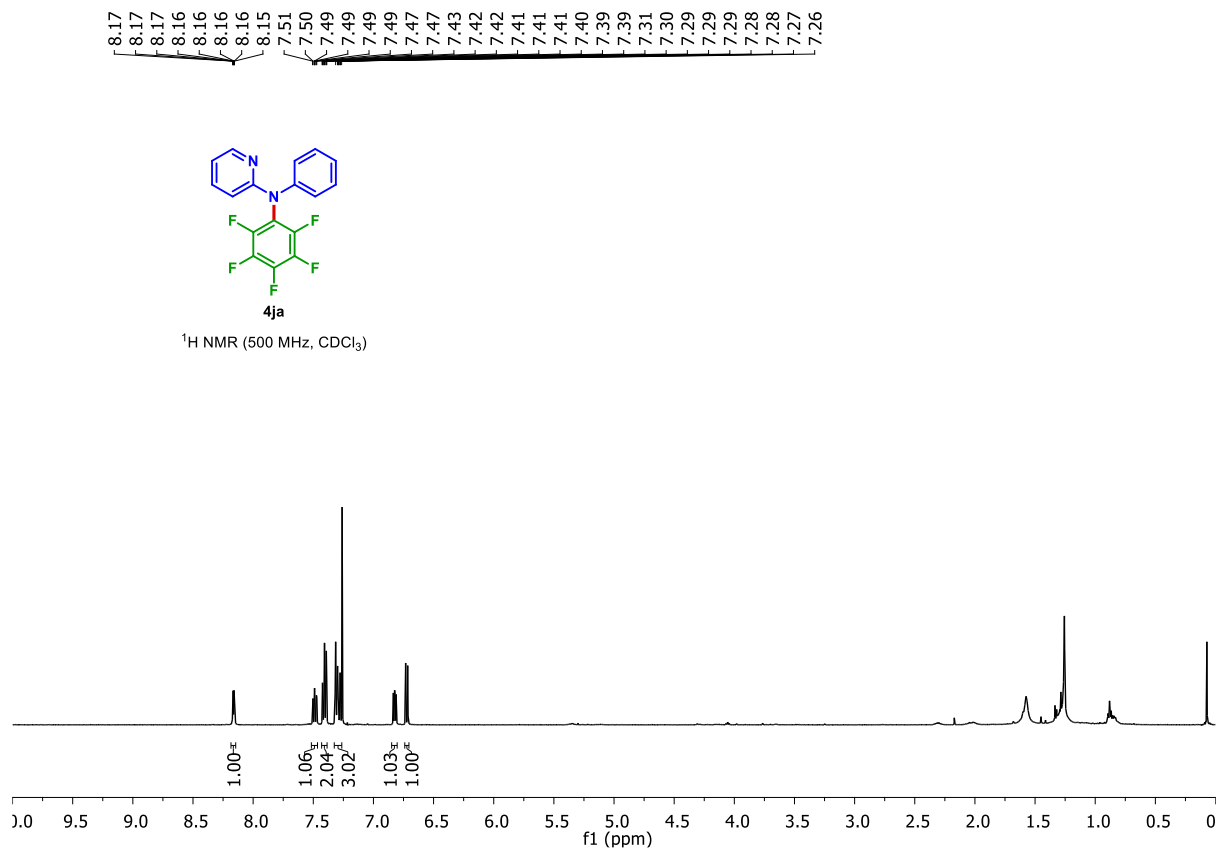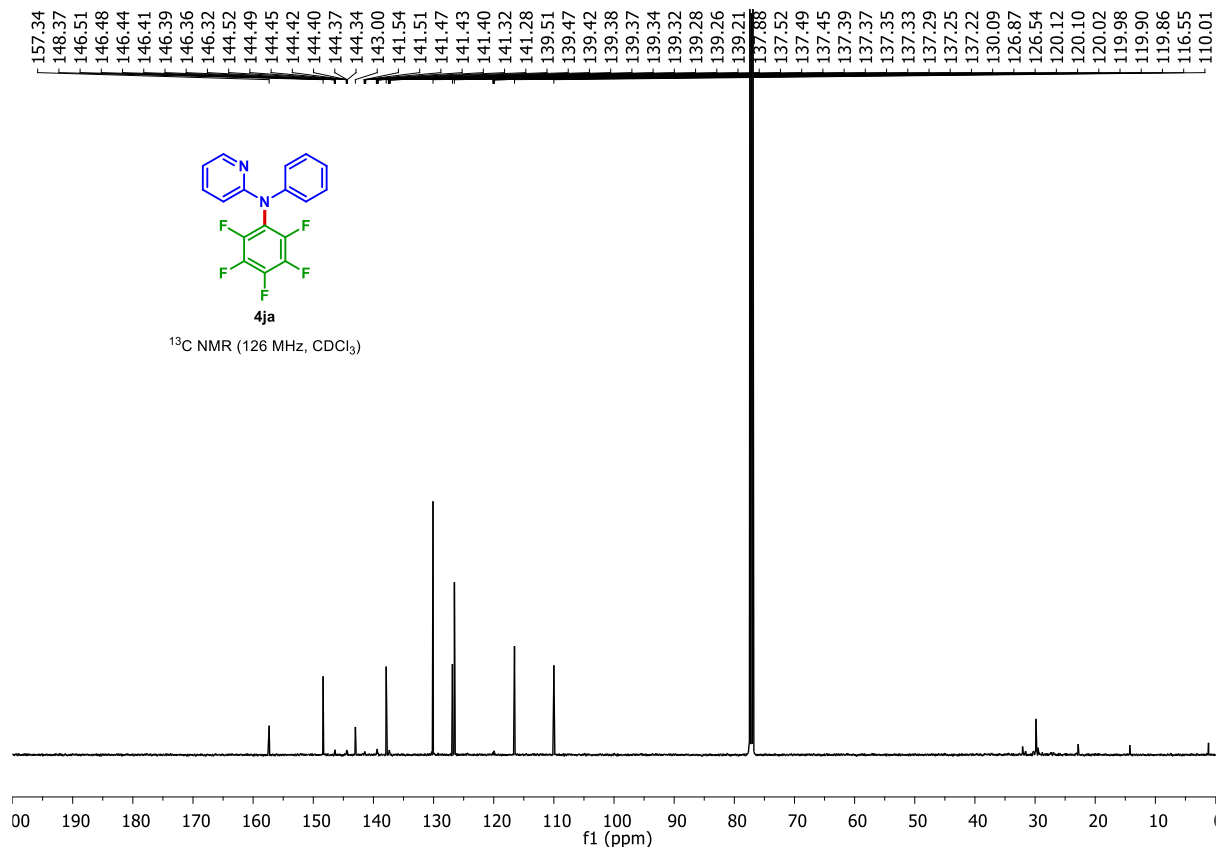

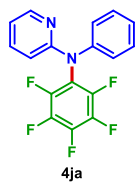

$^{19}\text{F}$  NMR (471 MHz,  $\text{CDCl}_3$ )

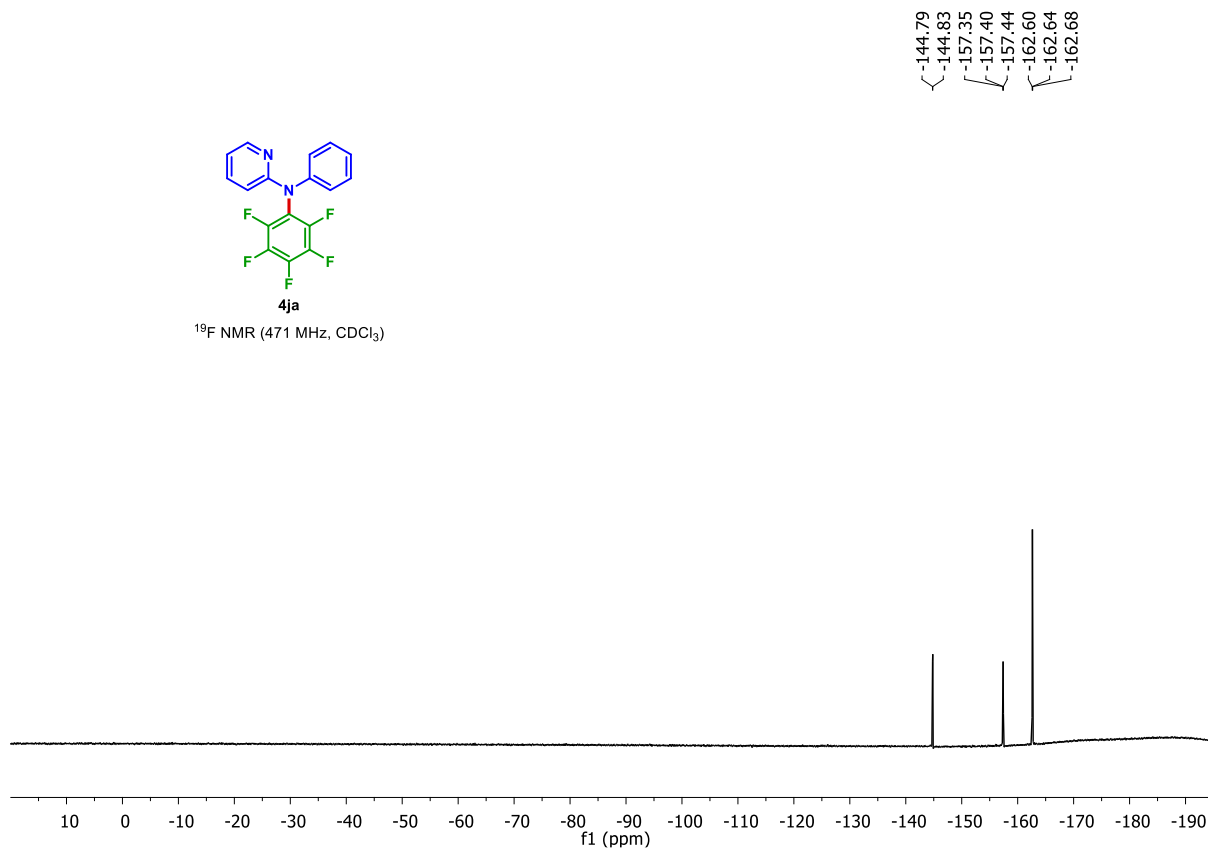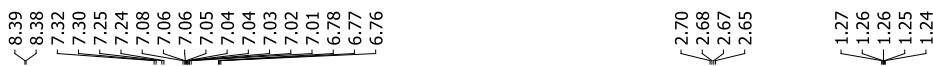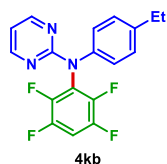

$^1\text{H}$  NMR (500 MHz,  $\text{CDCl}_3$ )

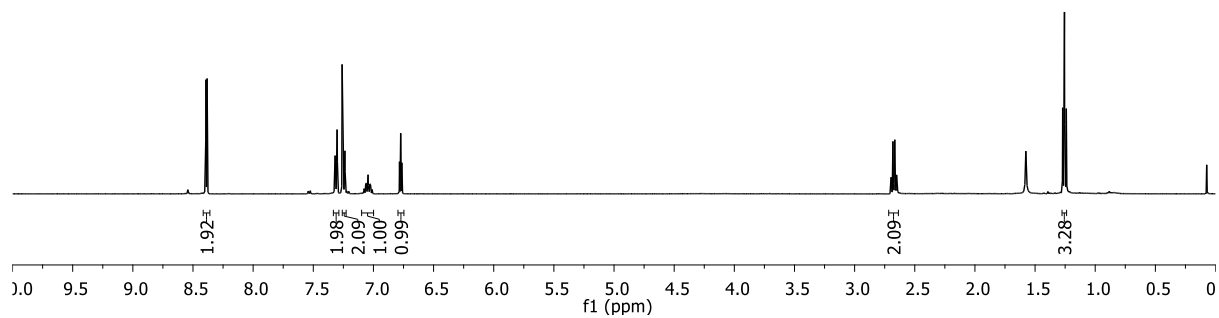

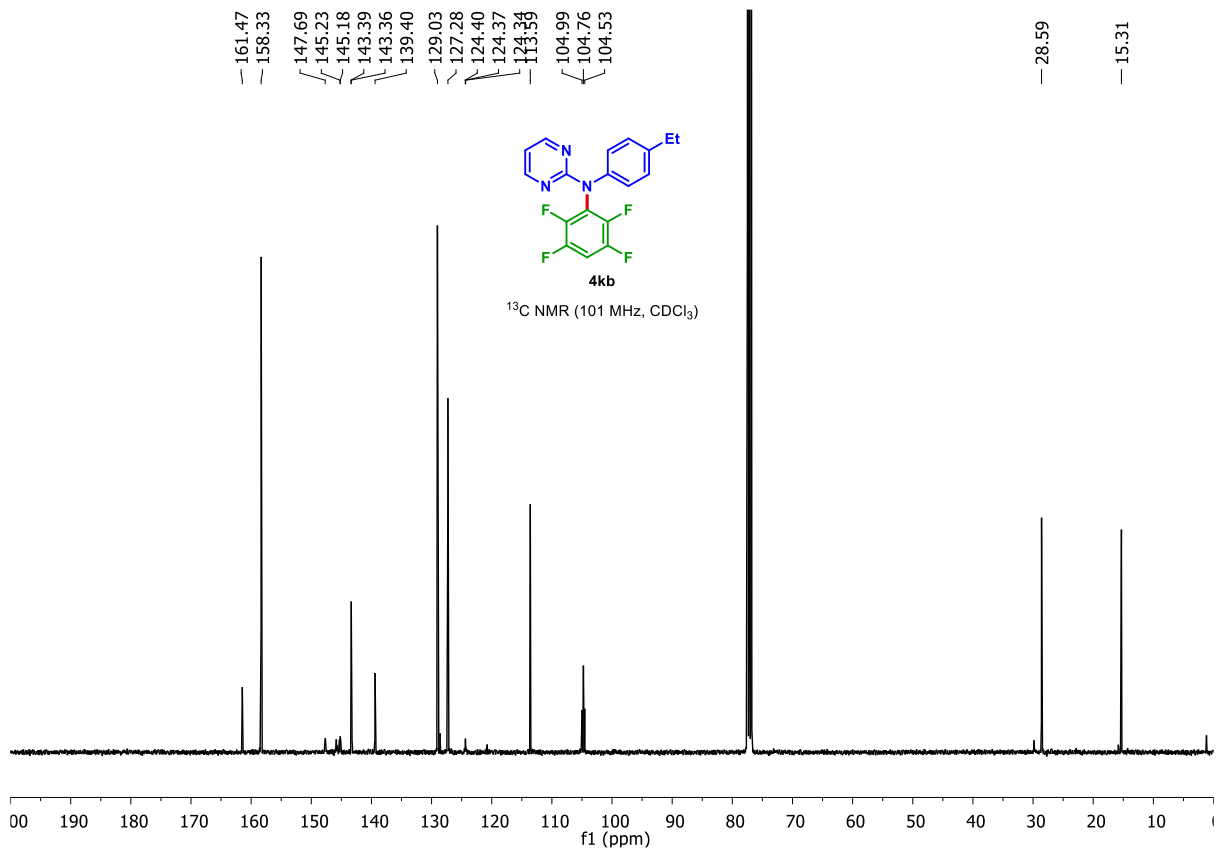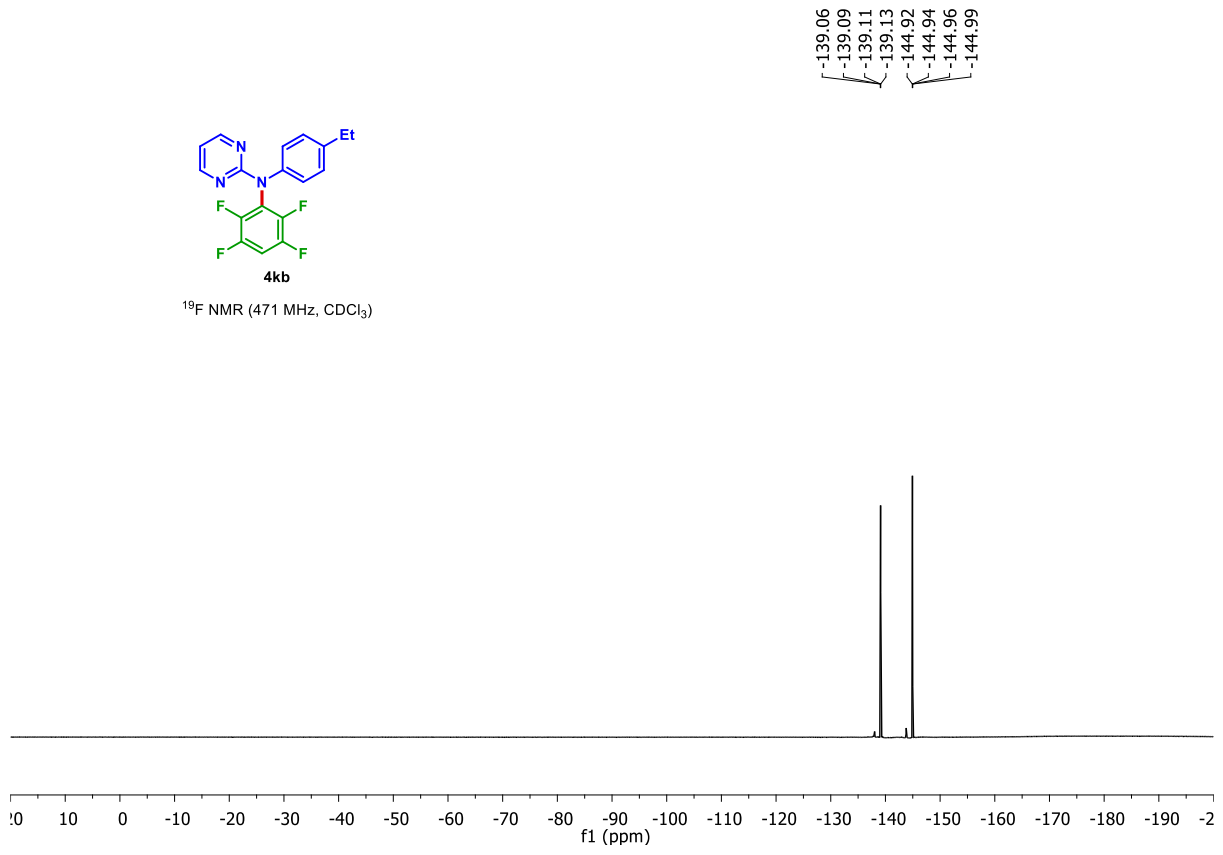

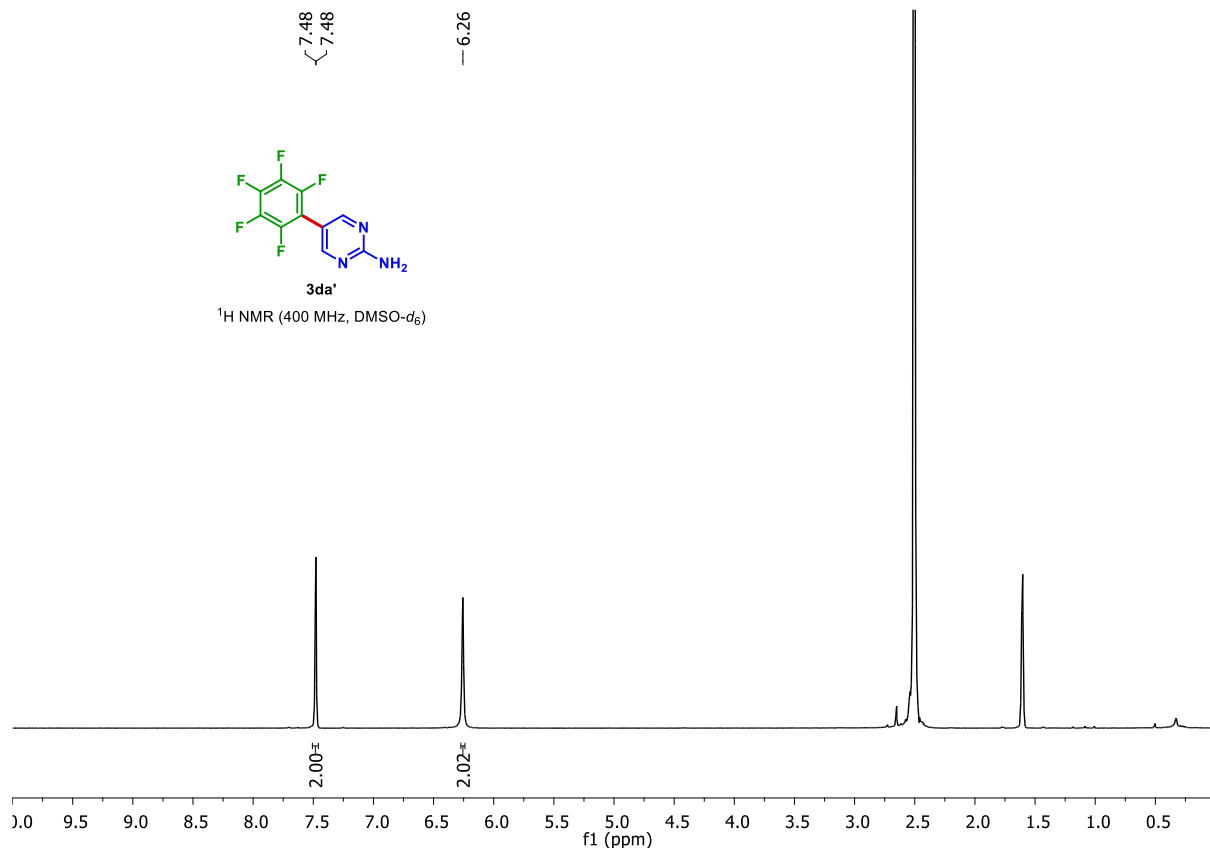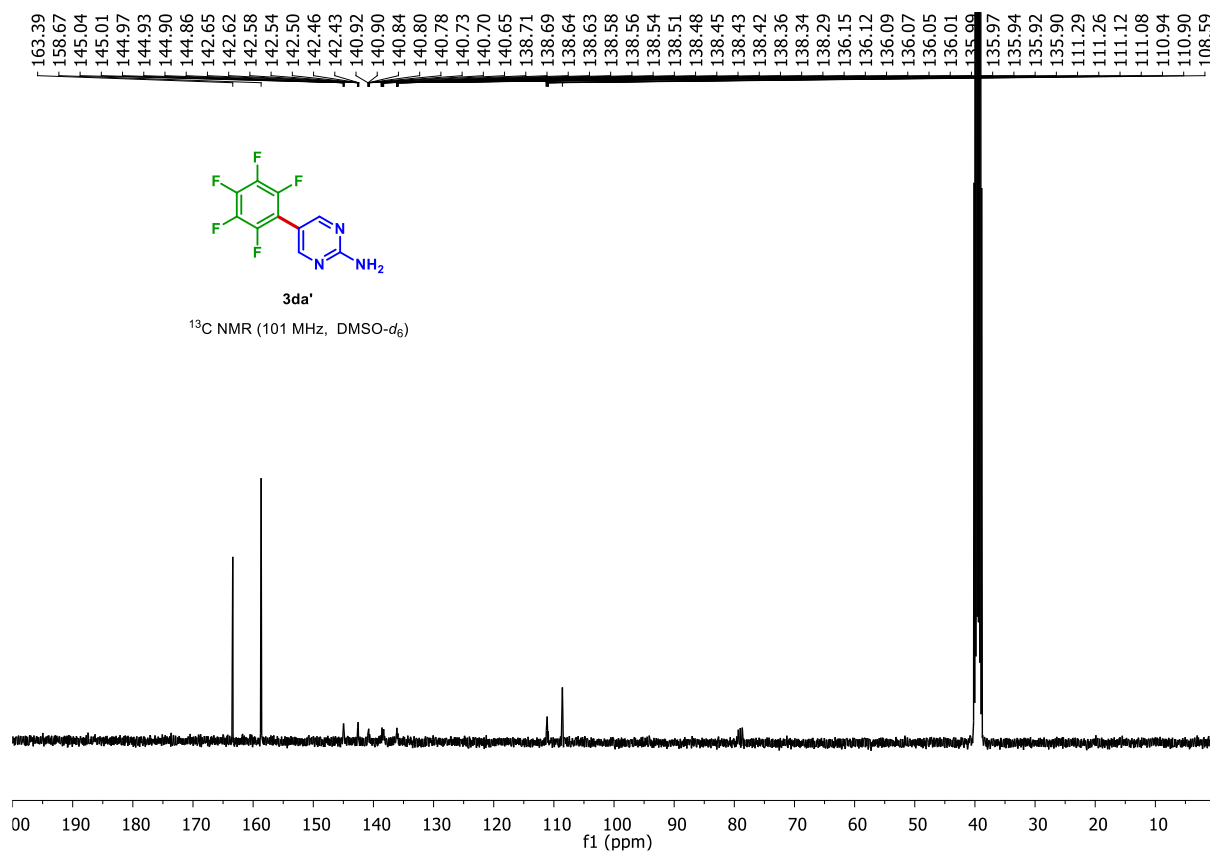

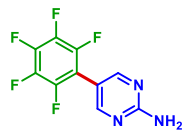

3da'

<sup>19</sup>F NMR (376 MHz, DMSO-d<sub>6</sub>)

-143.43  
-143.45  
-143.49  
-143.51

-156.30  
-156.36  
-156.42

-162.51  
-162.53  
-162.58  
-162.59  
-162.64  
-162.66

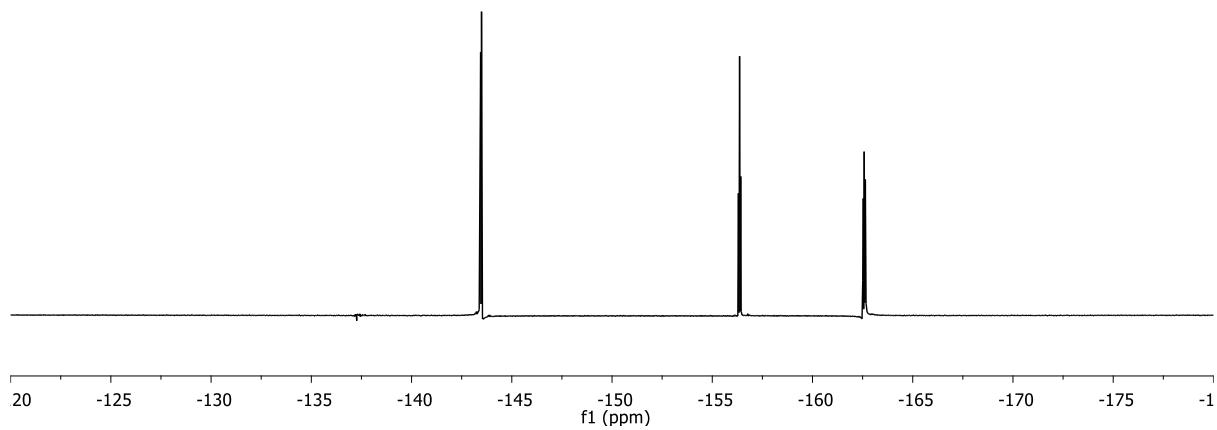

Supplement: d4cc01518e1.pdf [file d4cc01518e1.pdf]
